# Supplementary material for: Increasing the economic value of lignocellulosic stillage through medium-chain fatty acid production
Source: Springer Nature journal article supplement (doi:10.1186/s13068-018-1193-x), 2018-07-19
Supplement: MOESM7 [file 13068_2018_1193_MOESM7_ESM.pdf]

# Ethanol Production Process Engineering Analysis

Corn Stover Design Report Case: 2012 model DW1102A  
 Dilute Acid Pretreatment with Enzymatic Hydrolysis and Co-Fermentation  
 All Values in 2007\$

|                                              |                                        |
|----------------------------------------------|----------------------------------------|
| <b>Minimum Ethanol Selling Price (MESP):</b> | <b>\$1.76 /gal</b>                     |
| Gasoline-Equivalent MESP:                    | <b>\$2.68 /gal gasoline equivalent</b> |
| Contributions: Feedstock                     | <b>\$0.74 /gal</b>                     |
| Enzymes                                      | <b>\$0.34 /gal</b>                     |
| Non-Enzyme Conversion                        | <b>\$0.68 /gal</b>                     |
| Ethanol Production                           | 61.0 MMgal/yr (Ethanol at 68 °F)       |
| Ethanol Yield                                | 79.0 gal / dry U.S. ton feedstock      |
| Feedstock + Handling Cost                    | \$58.50 /dry U.S. ton                  |
| Internal Rate of Return (After-Tax)          | 10%                                    |
| Equity Percent of Total Investment           | 40%                                    |

| Capital Costs                               |                      |
|---------------------------------------------|----------------------|
| Pretreatment                                | \$29,900,000         |
| Neutralization/Conditioning                 | \$3,000,000          |
| Saccharification & Fermentation             | \$31,300,000         |
| On-site Enzyme Production                   | \$18,700,000         |
| Distillation and Solids Recovery            | \$22,300,000         |
| Wastewater Treatment                        | \$60,200,000         |
| Storage                                     | \$5,000,000          |
| Boiler/Turbogenerator                       | \$65,800,000         |
| Utilities                                   | \$6,900,000          |
| <b>Total Installed Equipment Cost</b>       | <b>\$243,100,000</b> |
| Added Direct + Indirect Costs<br>(% of TCI) | \$198,100,000<br>45% |
| <b>Total Capital Investment (TCI)</b>       | <b>\$441,200,000</b> |
| Installed Equipment Cost/Annual Gallon      | \$3.98               |
| Total Capital Investment/Annual Gallon      | \$7.23               |
| Loan Rate                                   | 8.0%                 |
| Term (years)                                | 10                   |
| Capital Charge Factor (Computed)            | 0.131                |
| Denatured Fuel Production (MMgal/yr)        | 61.7                 |
| Denatured Fuel Min. Sales Price             | \$1.80               |
| Denaturant Cost (\$/gal denaturant)         | \$2.10               |
| Maximum Yields (100% of Theoretical)        |                      |
| Ethanol Production (MMgal/yr)               | 80.3                 |
| Theoretical Yield (gal/U.S. ton)            | 103.9                |
| Current Yield (Actual/Theoretical)          | 76.0%                |

| Manufacturing Costs (cents/gal ethanol) |       |
|-----------------------------------------|-------|
| Feedstock + Handling                    | 74.1  |
| Sulfuric Acid                           | 2.4   |
| Ammonia                                 | 6.5   |
| Glucose (enzyme production)             | 19.3  |
| Other Raw Materials                     | 51.7  |
| Waste Disposal                          | 2.5   |
| Coproducts                              | -93.0 |
| Fixed Costs                             | 17.7  |
| Capital Depreciation                    | 22.8  |
| Average Income Tax                      | 12.8  |
| Average Return on Investment            | 59.5  |

| Manufacturing Costs (\$/yr)  |               |
|------------------------------|---------------|
| Feedstock + Handling         | \$45,200,000  |
| Sulfuric Acid                | \$1,500,000   |
| Ammonia                      | \$4,000,000   |
| Glucose (enzyme production)  | \$11,800,000  |
| Other Raw Materials          | \$31,600,000  |
| Waste Disposal               | \$1,500,000   |
| Net Coproducts               | -\$56,700,000 |
| Fixed Costs                  | \$10,800,000  |
| Capital Depreciation         | \$13,900,000  |
| Average Income Tax           | \$7,800,000   |
| Average Return on Investment | \$36,300,000  |

| Specific Operating Conditions   |      |
|---------------------------------|------|
| Enzyme Loading (mg/g cellulose) | 20   |
| Saccharification Time (days)    | 3.5  |
| Fermentation Time (days)        | 1.5  |
| Ethanol titer (wt%)             | 5.4% |
| Excess Electricity (kWh/gal)    | 0.4  |
| Plant Electricity Use (kWh/gal) | 5.3  |
| Plant Water Usage (gal/gal)     | 5.4  |
