# Supplementary material for: Increasing the economic value of lignocellulosic stillage through medium-chain fatty acid production
Source: Biotechnol Biofuels. 2018 Jul 19;11:200. doi: 10.1186/s13068-018-1193-x (PMC6052542; doi:10.1186/s13068-018-1193-x)
Supplement: Supplementary file 1 — Additional file 1. Chemical analyses of stillage production and mixed culture fermentation reactor. Table S1. Results from two fermentations of switchgrass hydrolysate with Saccharomyces cerevisiae Y128. Table S2. Soluble COD results for fermented switchgrass hydrolysate. Table S3. Summary of organic components in switchgrass stillage and the mixed culture fermentation reactor. Table S4. Total soluble COD in switchgrass stillage and mixed culture fermentation reactor. Table S5. Components in stillage and mixed culture fermentation reactor samples measured by GC-MS and HPLC analyses. Table S6. Total soluble carbohydrates measured in stillage and mixed culture fermentation reactor with the anthrone method. Table S7. Total soluble proteins in stillage and mixed culture fermentation reactor measured with the BCA assay. Table S8. Summary of aromatic compounds in stillage. [file 13068_2018_1193_MOESM1_ESM.xlsx]

## Sheet: Table_S1
Table S1. Results from two fermentations of switchgrass hydrolysate with Saccharomyces cerevisiae Y128
	Concentration (g/L)
Batch	Reac. Time(Hrs)	Glucose(g/L)	Xylose(g/L)	Pyruvate(g/L)	Xylitol(g/L)	Succinate(g/L)	Lactate(g/L)	Glycerol(g/L)	Formate(g/L)	Acetate(g/L)	Ethanol(g/L)
Batch1	0	52.9	33.9	0	0	0.0667	0	0.251	0.295	1.95	0.00473
Batch1	4.5	40.6	29.1	0	0	0.0577	0	0.35	0.235	1.62	0.588
Batch1	9	29.4	32.4	0	0	0.0732	0.0144	1.09	0.209	1.74	7.42
Batch1	22	0.0743	29.6	0	0	0.0868	0.038	2.2	0.154	1.59	23.9
Batch1	28	0.0666	27.3	0	0	0.0731	0.0369	2.18	0.149	1.57	24.2
Batch1	44	0.0484	22.3	0	0	0.0525	0.0366	2.18	0.139	1.53	25.4
Batch1	50.5	0.04	18.9	0	0	0.046	0.0344	2.06	0.126	1.44	24.7
Batch1	69	0.0419	15.9	0.179	0	0.0413	0.0364	2.22	0.127	1.53	26.6
Batch1	72	0.0426	14.9	0.176	0	0.0385	0.0346	2.13	0.122	1.47	25.7
Batch2	0	52.5	33.6	0	0	0.064	0	0.252	0.294	1.91	0.0246
Batch2	4.5	38	27.2	0	0	0.0541	0	0.323	0.224	1.55	0.44
Batch2	9	30.6	31.5	0	0	0.0671	0.0125	0.964	0.207	1.68	6.4
Batch2	22	0.103	31.4	0	0	0.089	0.0367	2.09	0.158	1.64	23.3
Batch2	28	0.0665	28.9	0	0	0.074	0.0348	2	0.145	1.53	22.8
Batch2	44	0.0421	24.9	0	0	0.0574	0.0337	1.95	0.129	1.48	23.1
Batch2	50.5	0.0439	26.2	0	0	0.0572	0.0378	2.15	0.129	1.61	25.4
Batch2	69	0.0422	22.6	0	0	0.0464	0.0335	2.09	0.118	1.53	24.8
Batch2	72	0.0403	20.9	0	0	0.043	0.0327	1.98	0.11	1.46	23.7
	Concentration mgCOD/L)
	Reac. Time(Hrs)	Glucose(mgCOD/L)	Xylose(mgCOD/L)	Pyruvate(mgCOD/L)	Xylitol(mgCOD/L)	Succinate(mgCOD/L)	Lactate(mgCOD/L)	Glycerol(mgCOD/L)	Formate(mgCOD/L)	Acetate(mgCOD/L)	Ethanol(mgCOD/L)
Batch1	0	56603	36273	0	0	63.365	0	306.22	103.25	2086.5	9.8384
Batch1	4.5	43442	31137	0	0	54.815	0	427	82.25	1733.4	1223.04
Batch1	9	31458	34668	0	0	69.54	15.408	1329.8	73.15	1861.8	15433.6
Batch1	22	79.501	31672	0	0	82.46	40.66	2684	53.9	1701.3	49712
Batch1	28	71.262	29211	0	0	69.445	39.483	2659.6	52.15	1679.9	50336
Batch1	44	51.788	23861	0	0	49.875	39.162	2659.6	48.65	1637.1	52832
Batch1	50.5	42.8	20223	0	0	43.7	36.808	2513.2	44.1	1540.8	51376
Batch1	69	44.833	17013	162.89	0	39.235	38.948	2708.4	44.45	1637.1	55328
Batch1	72	45.582	15943	160.16	0	36.575	37.022	2598.6	42.7	1572.9	53456
Batch2	0	56175	35952	0	0	60.8	0	307.44	102.9	2043.7	51.168
Batch2	4.5	40660	29104	0	0	51.395	0	394.06	78.4	1658.5	915.2
Batch2	9	32742	33705	0	0	63.745	13.375	1176.08	72.45	1797.6	13312
Batch2	22	110.21	33598	0	0	84.55	39.269	2549.8	55.3	1754.8	48464
Batch2	28	71.155	30923	0	0	70.3	37.236	2440	50.75	1637.1	47424
Batch2	44	45.047	26643	0	0	54.53	36.059	2379	45.15	1583.6	48048
Batch2	50.5	46.973	28034	0	0	54.34	40.446	2623	45.15	1722.7	52832
Batch2	69	45.154	24182	0	0	44.08	35.845	2549.8	41.3	1637.1	51584
Batch2	72	43.121	22363	0	0	40.85	34.989	2415.6	38.5	1562.2	49296
Hydorlysate	avg	56389	36112.5	0	0	62.0825	0	306.83	103.075	2065.1	30.5032
Hydrolysate	stdev	302.642	226.981	0	0	1.81373	0	0.86267	0.247487	30.2642	29.2244
Fermented Hydrolsate	avg	44.3515	19153	80.08	0	38.7125	36.0055	2507.1	40.6	1567.55	51376
Fermented Hydrolysate	stdev	1.74019	4539.63	113.25	0	3.02288	1.43755	129.401	2.96985	7.56604	2941.56

## Sheet: Table_S2
Table S2. Soluble COD results for fermented switchgrass hydrolysate
	Soluble COD (mg/L)
	Rep 1	Rep 2	Rep 3	Avg	Stdev
FermentedHydrolysate_Batch1_Rep1	162486	162064	163330	162627	644.344
FermentedHydrolysate_Batch1_Rep2	159533	160799	159955	160096	644.344
FermentedHydrolysate_Batch1_Rep3	165861	166282	165861	166001	243.539
FermentedHydrolysate_Batch2_Rep1	152362	150253	153628	152081	1704.77
FermentedHydrolysate_Batch2_Rep2	146035	150253	146457	147582	2323.22
FermentedHydrolysate_Batch2_Rep3	154893	154893	148566	152784	3653.09
Total				156862	1536

## Sheet: Table_S3
Table S3. Summary of organic components in switchgrass stillage and the mixed culture fermentation reactor
Sample ID	Unknown COD (mgCOD/L)	Other Soluble Carbohydrates (mgCOD/L)	Glucose (mgCOD/L)	Xylose (mgCOD/L)	Pyruvate (mgCOD/L)	Xylitol (mgCOD/L)	Succinate (mgCOD/L)	Lactate (mgCOD/L)	Glycerol (mgCOD/L)	Formate (mgCOD/L)	Acetate (mgCOD/L)	Butyrate (mgCOD/L)	Hexanoate (mgCOD/L)	Octanoate (mgCOD/L)	Propionate (mgCOD/L)	Valerate (mgCOD/L)	Heptanoate (mgCOD/L)	Propanoic acid, 2-methyl (mgCOD/L)	Butanoic acid, 3-methyl (mgCOD/L)	Pentanoic acid, 4-methyl (mgCOD/L)	Ethanol (mgCOD/L)	Acetamide (mgCOD/L)
Stillage	40224.8	17433.7	2488.07	20826.2	234.429	0	162.846	46.8724	3909.93	75.3747	2566.42	0	0	0	0	0	0	0	0	0	1403.4	4114.48
12	16522	1052.98	0	127.603	0	41.1433	0	49.4254	0	87.2889	11785.5	13208	5594.9	35.2	5622.4	3632.72	343.52	0	203.84	0	0	7320.32
18	22966.6	4415.1	83.7671	464.525	0	39.1947	2018.57	0	18.369	0	11072.3	10752	9726.51	369.6	3785.6	3893.76	532	0	131.04	0	0	4132.48
24	21728.5	8094.93	151.337	1428.58	58.1624	253.784	5541.11	91.2845	13.1582	36.6689	10227	9400	12308.8	862.4	2016	2246.4	425.6	0	216.32	0	691.2	4512
30	16133.2	11058.9	211.88	948.472	150.659	273.605	2395.21	802.22	0	38.3772	10326.8	15744	15307.1	1566.4	756	2670.72	288.8	0	374.4	0	1667.52	3877.76
36	19359.3	13826.8	216.279	1894.04	628.577	298.21	818.663	39.1241	41.3015	68.4715	9674.17	12856	14977.1	1601.6	6692	863.2	0	0	0	0	1346.88	3437.76
42	21231.4	14596.5	234.574	2111.09	631.287	300.068	414.95	0	59.6768	70.5843	9197.15	13416	15335.8	1654.4	5236	1252.16	0	0	0	0	1953.6	3935.68
48	26163.7	12667.9	252.815	4065.56	600.362	349.996	322.327	288.956	11.3175	79.1587	8779.79	11800	13843.8	1724.8	0	0	0	0	0	0	1862.4	3527.68
54	24282.5	17063.2	234.885	717.933	26.577	293.572	168.044	0	45.4708	76.356	7605.56	14888	13972.9	1636.8	0	0	0	0	0	0	1604.16	6396.8
60	24373.2	16296.2	227.114	723.841	35.3599	282.143	160.084	0	18.4288	83.029	6039.71	16440	14934.1	1320	169.12	1045.2	0	0	0	0	1891.2	5168
66	21101.6	15914.8	238.236	709.638	28.4268	373.91	207.122	22.0332	15.9635	92.5539	6375.02	16952	14776.3	1372.8	6658.4	538.72	0	0	0	0	0	3936.96
72	23343.6	16648.2	270.946	855.091	7.53903	407.257	233.155	23.0538	15.8914	101.924	6153.29	17744	14288.5	1249.6	3085.6	752.96	0	0	0	0	0	4657.28
78	27522.3	11959.5	193.947	613.876	37.4426	455.194	277.813	31.8922	12.0609	103.552	7857.73	16248	14489.3	1179.2	789.6	474.24	0	0	0	0	355.2	5568.96
84	19390.8	13667.4	177.893	528.315	0	401.445	295.649	0	19.864	93.7762	8244.6	18648	14403.3	1267.2	296.24	679.12	0	0	0	0	1260.96	5892.48
90	23893.2	13488.1	182.759	560.386	0	411.027	286.102	0	23.5581	82.0281	7973.17	16904	15421.8	1460.8	0	904.8	0	0	0	0	1603.2	5879.36
96	26628.7	11241.5	178.694	565.388	0	385.996	266.922	0	27.0512	77.1926	8114.64	15504	14331.5	1390.4	0	478.4	0	0	0	0	1761.6	6636.8
102	23290.8	13588.6	174.677	588.103	0	389.388	293.169	0	26.4045	80.2889	8227.63	15152	14145	1460.8	0	786.24	0	0	0	0	1992	6241.6
108	25354.2	11337.3	147.851	593.454	0	394.727	299.461	0	33.4494	77.2924	7781.04	14216	12925.6	1284.8	0	68.64	0	0	0	0	2150.4	5235.2
114	23160.6	10051.1	143.206	2860.34	315.678	401.306	367.778	0	60.5137	80.5387	7879.44	14672	16296.9	1654.4	0	1071.2	0	0	0	17.92	1944	4528.32
120	20877.8	4288.78	171.992	6820.56	523.854	514.1	425.97	0	100.679	123.986	9098.75	13680	18262.3	2393.6	0	453.44	0	0	0	0	1809.6	5198.08
126	25872.5	6106.86	120.267	11973.1	727.602	508.588	281.533	0	99.9351	83.9916	6546.95	10048	12079.2	1689.6	0	715.52	0	0	0	0	1963.2	6565.76
132	28812.6	936.713	98.4363	13410.7	101.523	569.825	296.881	0	105.6	94.786	7003.26	12232	12265.7	1619.2	0	629.2	0	0	0	0	2438.4	6018.88
138	23366.8	2271.29	123.643	11500.9	92.6789	633.794	344.443	0	126.183	119.295	8139.22	15384	14446.3	2059.2	0	599.04	0	0	0	0	2486.4	5953.6
144	18970.8	1398.24	150.168	13079.4	0	711.183	384.292	26.0964	110.409	130.836	9121.29	14520	16741.6	2164.8	0	777.92	0	0	0	0	2884.8	4505.6
150	26779.1	6228.08	63.9636	4242.44	352.477	411.361	265.056	0	72.0195	84.9144	6705.37	12144	14962.8	1672	0	652.08	0	0	0	0	2836.8	6623.04
156	24510.2	4191.9	45.5919	6064.96	237.147	427.884	294.982	0	62.5519	89.1666	7711.31	12480	15335.8	1742.4	450.24	557.44	0	0	0	0	2313.6	8343.36
162	28939.4	1386.42	79.2723	10460.6	219.638	401.585	264.125	0	90.8244	79.4707	6957.93	10456	14302.8	1848	0	773.76	0	0	0	0	2433.6	5338.88
168	30114	7902.99	38.6003	1759.86	135.746	305.78	174.453	0	34.3692	65.6819	5071.75	10864	11720.6	1496	166.88	953.68	0	0	0	0	3585.6	5961.28
174	21713	10798.9	82.2137	393.666	0	320.061	322.695	0	56.9274	82.6399	8215.62	15496	15622.7	1478.4	561.12	1283.36	0	0	0	0	556.8	5936
180	19100.5	10476.9	65.7523	300.461	0	293.974	315.715	0	55.1788	85.0657	8607.07	14784	16340	1548.8	163.52	1432.39	0	0	0	0	3883.2	5011.2
186	29437	9802.68	45.6131	693.385	0	330.51	238.399	0	35.3505	78.904	6541.8	12824	14173.7	1408	0	0	0	0	0	0	4468.8	5124.16
192	20968.7	9811.16	60.4943	310.943	0	448.477	319.998	0	51.9596	83.956	7671.9	16384	18491.8	1513.6	436.8	0	0	0	0	0	2923.2	5970.56
198	19073.2	9782.76	59.7757	350.109	0	477.757	331.962	0	47.0757	93.544	7685.26	15488	17430.3	1636.8	342.72	628.16	0	0	0	0	2457.6	6377.28
204	22603.6	7362.8	63.8868	349.941	0	355.553	308.222	0	45.8798	96.7973	7441.98	15648	16971.2	1496	0	877.76	0	0	0	0	4113.6	4677.44
210	21021.9	6811.25	60.9866	345.909	0	387.169	319.004	0	47.5887	103.944	7411.1	15632	18606.6	1619.2	0	919.36	0	0	0	0	4838.4	4208.32
216	8476.19	10441.9	60.2625	359.81	0	547.873	332.006	0	45.4242	96.6749	8115.29	15912	18190.6	1619.2	0	1355.12	0	0	0	0	4646.4	5265.6
222	25738	7368.45	45.2692	299.044	0	483.793	317.364	0	46.5378	91.5963	8012.04	14664	16684.3	1531.2	0	0	0	0	0	0	3120	3490.56
228	16136.2	8279.71	48.3082	400.264	0	326.781	320.079	0	35.3666	95.2421	8021.77	14472	18420.1	1636.8	0	1170	0	0	0	15.36	4296	4354.56
234	17223.6	8800.18	42.0599	93.5612	42.3108	247.816	301.43	0	36.5303	98.063	7953.39	14864	17889.3	1566.4	421.12	869.44	0	0	43.68	0	4800	5345.28
240	19989.8	6851.76	48.7844	407.568	0	168.803	297.535	12.6116	28.1083	92.2716	7494.49	14824	18090.2	1795.2	362.88	1123.2	0	0	0	0	3873.6	5119.36
246	17533.2	7552.02	66.16	717.121	0	47.7129	317.746	8.37014	60.052	82.0564	7613.63	16312	17918	1812.8	0	0	0	0	0	0	3892.8	5329.6
252	12700.7	7352.92	48.4683	83.6673	52.1383	45.1461	361.76	0	42.9283	80.8539	7909.72	16944	18721.4	1848	558.88	763.36	0	0	0	0	4809.6	4738.56
Sample ID	Unknown COD	Other Measured Organics	Other Soluble Carbohydrates	Octanoate (C8)	Heptanoate (C7)	Hexanoate (C6)	Valerate (C5)	Butyrate (C4)	Propanoate (C3)	Acetate (C2)	Ethanol	Glycerol	Xylose
Stillage	40224.8	9232.76	17433.7	0	0	0	0	0	0	2566.42	1403.4	3909.93	20826.2
12	16522	10424.8	1052.98	35.2	343.52	5594.9	3632.72	13208	5622.4	11785.5	0	0	127.603
18	22966.6	9238.07	4415.1	369.6	532	9726.51	3893.76	10752	3785.6	11072.3	0	18.369	464.525
24	21728.5	13661.9	8094.93	862.4	425.6	12308.8	2246.4	9400	2016	10227	691.2	13.1582	1428.58
30	16133.2	11085.6	11058.9	1566.4	288.8	15307.1	2670.72	15744	756	10326.8	1667.52	0	948.472
36	19359.3	8318.12	13826.8	1601.6	0	14977.1	863.2	12856	6692	9674.17	1346.88	41.3015	1894.04
42	21231.4	8369.72	14596.5	1654.4	0	15335.8	1252.16	13416	5236	9197.15	1953.6	59.6768	2111.09
48	26163.7	8293.63	12667.9	1724.8	0	13843.8	0	11800	0	8779.79	1862.4	11.3175	4065.56
54	24282.5	10214.2	17063.2	1636.8	0	13972.9	0	14888	0	7605.56	1604.16	45.4708	717.933
60	24373.2	9158.65	16296.2	1320	0	14934.1	1045.2	16440	169.12	6039.71	1891.2	18.4288	723.841
66	21101.6	8072.61	15914.8	1372.8	0	14776.3	538.72	16952	6658.4	6375.02	0	15.9635	709.638
72	23343.6	8609.26	16648.2	1249.6	0	14288.5	752.96	17744	3085.6	6153.29	0	15.8914	855.091
78	27522.3	8952.01	11959.5	1179.2	0	14489.3	474.24	16248	789.6	7857.73	355.2	12.0609	613.876
84	19390.8	9361.28	13667.4	1267.2	0	14403.3	679.12	18648	296.24	8244.6	1260.96	19.864	528.315
90	23893.2	10399.3	13488.1	1460.8	0	15421.8	904.8	16904	0	7973.17	1603.2	23.5581	560.386
96	26628.7	10936.5	11241.5	1390.4	0	14331.5	478.4	15504	0	8114.64	1761.6	27.0512	565.388
102	23290.8	9934.51	13588.6	1460.8	0	14145	786.24	15152	0	8227.63	1992	26.4045	588.103
108	25354.2	8697.94	11337.3	1284.8	0	12925.6	68.64	14216	0	7781.04	2150.4	33.4494	593.454
114	23160.6	8000.78	10051.1	1654.4	0	16296.9	1071.2	14672	0	7879.44	1944	60.5137	2860.34
120	20877.8	9121.68	4288.78	2393.6	0	18262.3	453.44	13680	0	9098.75	1809.6	100.679	6820.56
126	25872.5	10337.3	6106.86	1689.6	0	12079.2	715.52	10048	0	6546.95	1963.2	99.9351	11973.1
132	28812.6	8945.87	936.713	1619.2	0	12265.7	629.2	12232	0	7003.26	2438.4	105.6	13410.7
138	23366.8	8969.35	2271.29	2059.2	0	14446.3	599.04	15384	0	8139.22	2486.4	126.183	11500.9
144	18970.8	7563.63	1398.24	2164.8	0	16741.6	777.92	14520	0	9121.29	2884.8	110.409	13079.4
150	26779.1	9515.74	6228.08	1672	0	14962.8	652.08	12144	0	6705.37	2836.8	72.0195	4242.44
156	24510.2	10806.9	4191.9	1742.4	0	15335.8	557.44	12480	450.24	7711.31	2313.6	62.5519	6064.96
162	28939.4	8834.58	1386.42	1848	0	14302.8	773.76	10456	0	6957.93	2433.6	90.8244	10460.6
168	30114	9045.98	7902.99	1496	0	11720.6	953.68	10864	166.88	5071.75	3585.6	34.3692	1759.86
174	21713	8985.34	10798.9	1478.4	0	15622.7	1283.36	15496	561.12	8215.62	556.8	56.9274	393.666
180	19100.5	7748.09	10476.9	1548.8	0	16340	1432.39	14784	163.52	8607.07	3883.2	55.1788	300.461
186	29437	7461.77	9802.68	1408	0	14173.7	0	12824	0	6541.8	4468.8	35.3505	693.385
192	20968.7	8998.38	9811.16	1513.6	0	18491.8	0	16384	436.8	7671.9	2923.2	51.9596	310.943
198	19073.2	10935.2	9782.76	1636.8	0	17430.3	628.16	15488	342.72	7685.26	2457.6	47.0757	350.109
204	22603.6	7412.68	7362.8	1496	0	16971.2	877.76	15648	0	7441.98	4113.6	45.8798	349.941
210	21021.9	7328.84	6811.25	1619.2	0	18606.6	919.36	15632	0	7411.1	4838.4	47.5887	345.909
216	8476.19	8607.56	10441.9	1619.2	0	18190.6	1355.12	15912	0	8115.29	4646.4	45.4242	359.81
222	25738	6741.35	7368.45	1531.2	0	16684.3	0	14664	0	8012.04	3120	46.5378	299.044
228	16136.2	7503.91	8279.71	1636.8	0	18420.1	1170	14472	0	8021.77	4296	35.3666	400.264
234	17223.6	7966.72	8800.18	1566.4	0	17889.3	869.44	14864	421.12	7953.39	4800	36.5303	93.5612
240	19989.8	7714.89	6851.76	1795.2	0	18090.2	1123.2	14824	362.88	7494.49	3873.6	28.1083	407.568
246	17533.2	7911.51	7552.02	1812.8	0	17918	0	16312	0	7613.63	3892.8	60.052	717.121
252	12700.7	7670.51	7352.92	1848	0	18721.4	763.36	16944	558.88	7909.72	4809.6	42.9283	83.6673

## Sheet: Table_S4
Table S4. TotalsSoluble COD in switchgrass stillage and mixed culture fermentation reactor.
	Soluble COD (mgCOD/L)
Sample ID
Stillage_Batch1_Rep1	95412.3	95624.9	96050.2	95695.8	324.795
Stillage_Batch1_Rep2	94945.5	95158.1	94945.5	95016.4	122.767
Stillage_Batch2_Rep1	94594.7	95444.8	95869.9	95303.1	649.272
Stillage_Batch2_Rep2	97510.1	96018	95591.6	96373.2	1007.37
Stillage_Combined				95597.1	752.036
12	68558.8	68349.7	68140.5	68349.7	209.13
18	76540.5	77789.6	77373.2	77234.5	636
24	83172.8	83378.1	82762.1	83104.3	313.672
30	86869	88101.1	87690.4	87553.5	627.344
36	91313.6	91108.1	91929.9	91450.5	427.7
42	93989.6	94625.4	94625.4	94413.5	367.086
48	89143.1	89143.1	89352.3	89212.8	120.792
54	91750.1	92591.8	91750.1	92030.6	485.962
60	92618.9	92409.6	92200.4	92409.6	209.25
66	91857.3	92908.2	92698	92487.8	556.112
72	92113.7	93167.5	92956.8	92746	557.619
78	90663	90663	90033.1	90453.1	363.662
84	87830	87452.6	88018.7	87767.1	288.208
90	92843.8	92209.6	92843.8	92632.4	366.19
96	92097.3	90630.6	90211.6	90979.8	990.181
102	89122.3	89541.4	88912.8	89192.2	320.062
108	84722.2	84303.1	84303.1	84442.8	241.944
114	87736.5	87736.5	87481.1	87651.3	147.446
120	86269.3	86907.2	87545.1	86907.2	637.885
126	87290.5	87715.8	87290.5	87432.3	245.534
132	87839.8	89098.6	88259.4	88399.2	640.951
138	90059.7	89419.8	88566.5	89348.7	749.121
144	86976.5	87831.9	87190.3	87332.9	445.196
150	85881.2	86093.8	85456.2	85810.4	324.636
156	86442.3	86227.2	86012.2	86227.2	215.081
162	85510.7	86970.6	86970.6	86484	842.831
168	82715.7	81877	83554.4	82715.7	838.663
174	84393	85231.7	85860.7	85161.8	736.322
180	85484.3	83604.7	84231.2	84440.1	957.078
186	85293.3	90164.6	85081.5	86846.5	2875.55
192	85146.6	87704.6	89836.2	87562.5	2348.03
198	87491.4	84933.4	85146.6	85857.1	1419.31
204	82433.6	83483.5	87053.3	84323.4	2421.69
210	83943.4	85008.1	84795.1	84582.2	563.38
216	77066.6	78120.9	78120.9	77769.5	608.744
222	84275.2	84486	83853.6	84204.9	322.001
228	82313.9	80048.6	78754.1	80372.2	1801.87
234	85840.7	80484.6	81127.4	82484.2	2924.51
240	80270.4	80270.4	87126.2	82555.7	3958.19
246	81886.4	81252.7	80830.2	81323.1	531.608
252	79405.6	79691.7	79119.6	79405.6	286.081

## Sheet: Table_S5
Table S5. Components in stillage and mixed culture fermentation reactor samples measured by GC-MS and HPLC analyses
COD (mgCOD/mg)	1.06568		1.06568		0.908394		1.15671		0.948386		1.06568		1.21607		0.347615		1.06568		2.08388		1.08346		1.51191		1.81591		2.03662		2.20389		2.33514		2.44088		1.81591		2.03662		2.20389
	Glucose (mgCOD/L)		Xylose (mgCOD/L)		Pyruvate (mgCOD/L)		Xylitol (mgCOD/L)		Succinate (mgCOD/L)		Lactate (mgCOD/L)		Glycerol (mgCOD/L)		Formate (mgCOD/L)		Acetate (mgCOD/L)		Ethanol (mgCOD/L)		Acetamide (mgCOD/L)		Propionate (mgCOD/L)		Butyrate (mgCOD/L)		Valerate (mgCOD/L)		Hexanoate (mgCOD/L)		Heptanoate (mgCOD/L)		Octanoate (mgCOD/L)		Propanoic acid, 2-methyl (mgCOD/L)		Butanoic acid, 3-methyl (mgCOD/L)		Pentanoic acid, 4-methyl (mgCOD/L)		Total HPLC GC-MS Quantified COD (mgCOD/L)
Sample ID	Avg	Stdev	Avg	Stdev	Avg	Stdev	Avg	Stdev	Avg	Stdev	Avg	Stdev	Avg	Stdev	Avg	Stdev	Avg	Stdev	Avg		Avg		Avg	Stdev	Avg	Stdev	Avg	Stdev	Avg	Stdev	Avg		Avg	Stdev	Avg	Stdev	Avg	Stdev	Avg	Stdev	Avg	Stdev
Stillage_Batch1_Rep1	2486.68	5.2464	20808.6	18.7023	226.06	3.86502	0	0	169.46	3.56497	46.4821	1.64797	3905.95	6.93011	74.588	0.492606	2547.35	7.10148	975.84	8.82469	4238.72	152.961	0	0	0	0	0	0	0	0	0	0	0	0	0	0	0	0	0	0	35479.7	154.859
Stillage_Batch1_Rep2	2485.49	30.373	20794.1	255.238	225.896	1.00351	0	0	160.855	1.07048	46.9736	2.4903	3899.49	54.7897	74.0349	0.0630519	2557.3	34.3686	1465.44	196.18	3811.84	116.757	0	0	0	0	0	0	0	0	0	0	0	0	0	0	0	0	0	0	35521.5	349.827
Stillage_Batch2_Rep1	2482.92	16.0186	20791	152.667	237.146	2.65338	0	0	159.81	0.480523	45.9619	2.15588	3902.06	34.6286	77.8576	0.779508	2578.11	26.3814	1723.2	21.7223	4318.4	502.781	0	0	0	0	0	0	0	0	0	0	0	0	0	0	0	0	0	0	36316.5	527.951
Stillage_Batch2_Rep2	2497.21	25.2895	20910.9	203.337	248.616	7.39432	0	0	161.258	2.67317	48.0719	0.126694	3932.23	42.8383	75.0184	0.856111	2582.92	23.3047	1449.12	48.1964	4088.96	212.698	0	0	0	0	0	0	0	0	0	0	0	0	0	0	0	0	0	0	35994.3	303.298
Stillage_Combined	2488.07	17.2523	20826.2	146.207	234.429	10.5603	0	0	162.846	4.47431	46.8724	1.62314	3909.93	32.6277	75.3747	1.64744	2566.42	24.4422	1403.4	298.424	4114.48	300.851	0	0	0	0	0	0	0	0	0	0	0	0	0	0	0	0	0	0	35828	450.601
12	0	0	127.603	1.36025	0	0	41.1433	7.55317	0	0	49.4254	0.164207	0	0	87.2889	8.22199	11785.5	86.6261	0	0	7320.32	231.705	5622.4	126.714	13208	192.333	3632.72	201.497	5594.9	81.1526	343.52	90.2834	35.2	0	0	0	203.84	64.7144	0	0	48051.9	417.003
18	83.7671	1.43034	464.525	3.68573	0	0	39.1947	9.49389	2018.57	0.743555	0	0	18.369	0.108736	0	0	11072.3	1.34724	0	0	4132.48	178.304	3785.6	205.909	10752	22.6274	3893.76	247.091	9726.51	81.1526	532	12.8976	369.6	24.8902	0	0	131.04	50.0066	0	0	47019.7	381.756
24	151.337	3.28247	1428.58	2.3704	58.1624	1.08526	253.784	22.581	5541.11	25.69	91.2845	0.40779	13.1582	0.748748	36.6689	0.153915	10227	31.9832	691.2	89.6046	4512	171.968	2016	63.3568	9400	124.451	2246.4	352.988	12308.8	121.729	425.6	111.779	862.4	74.6705	0	0	216.32	152.961	0	0	50479.7	490.103
30	211.88	1.3974	948.472	0.46589	150.659	1.11548	273.605	5.66959	2395.21	11.3549	802.22	3.08423	0	0	38.3772	0.279168	10326.8	43.4279	1667.52	42.087	3877.76	115.852	756	87.1156	15744	113.137	2670.72	211.793	15307.1	223.17	288.8	21.496	1566.4	74.6705	0	0	374.4	0	0	0	57399.9	371.942
36	216.279	8.51755	1894.04	35.5002	628.577	11.5452	298.21	1.47866	818.663	27.9787	39.1241	0.154951	41.3015	0.461932	68.4715	2.12817	9674.17	234.925	1346.88	17.6494	3437.76	175.136	6692	245.507	12856	101.823	863.2	147.078	14977.1	284.034	0	0	1601.6	174.231	0	0	0	0	0	0	55453.4	540.125
42	234.574	2.40559	2111.09	6.07317	631.287	3.59411	300.068	6.62387	414.95	10.2112	0	0	59.6768	0.107989	70.5843	0.458673	9197.15	32.291	1953.6	772.5	3935.68	206.815	5236	245.507	13416	169.706	1252.16	200.026	15335.8	142.017	0	0	1654.4	49.7803	0	0	0	0	0	0	55803	890.228
48	252.815	7.3149	4065.56	67.5421	600.362	12.4889	349.996	10.175	322.327	13.1959	288.956	4.95875	11.3175	0.217546	79.1587	1.7819	8779.79	147.656	1862.4	67.8823	3527.68	158.392	0	0	11800	56.5685	0	0	13843.8	101.441	0	0	1724.8	99.5606	0	0	0	0	0	0	47508.9	282.803
54	234.885	0.269389	717.933	2.09017	26.577	0.980527	293.572	3.58765	168.044	1.29747	0	0	45.4708	9.63883	76.356	0.0449016	7605.56	37.6099	1604.16	77.3858	6396.8	23.5325	0	0	14888	214.96	0	0	13972.9	40.5763	0	0	1636.8	24.8902	0	0	0	0	0	0	47667	237.789
60	227.114	4.28025	723.841	7.01285	35.3599	1.33013	282.143	4.03396	160.084	1.20239	0	0	18.4288	0.11239	83.029	0.596976	6039.71	40.9111	1891.2	54.3058	5168	109.517	169.12	61.7728	16440	305.47	1045.2	275.036	14934.1	142.017	0	0	1320	24.8902	0	0	0	0	0	0	48537.3	458.547
66	238.236	3.75895	709.638	6.37	28.4268	1.1345	373.91	13.4636	207.122	2.44812	22.0332	0.530234	15.9635	0.209554	92.5539	0.619232	6375.02	35.7845	0	0	3936.96	198.669	6658.4	293.025	16952	486.489	538.72	108.838	14776.3	162.305	0	0	1372.8	49.7803	0	0	0	0	0	0	52298	635.764
72	270.946	0.785273	855.091	0.940385	7.53903	10.6618	407.257	26.2506	233.155	0.933615	23.0538	0.821887	15.8914	0.411513	101.924	0.460712	6153.29	13.6239	0	0	4657.28	1116.89	3085.6	356.382	17744	90.5097	752.96	294.156	14288.5	202.881	0	0	1249.6	74.6705	0	0	0	0	0	0	49846.1	1231.62
78	193.947	5.8569	613.876	22.0442	37.4426	6.25538	455.194	6.56688	277.813	12.143	31.8922	0.749296	12.0609	0.866638	103.552	4.96186	7857.73	343.191	355.2	54.3058	5568.96	371.542	789.6	39.598	16248	124.451	474.24	294.156	14489.3	202.881	0	0	1179.2	24.8902	0	0	0	0	0	0	48688.1	636.328
84	177.893	0.688937	528.315	0.557627	0	0	401.445	26.5883	295.649	1.99168	0	0	19.864	0.594176	93.7762	0.132875	8244.6	21.5843	1260.96	141.874	5892.48	276.054	296.24	72.0683	18648	848.528	679.12	163.257	14403.3	405.763	0	0	1267.2	49.7803	0	0	0	0	0	0	52208.8	1008.21
90	182.759	0.691226	560.386	2.7418	0	0	411.027	24.4174	286.102	0.80089	0	0	23.5581	0.228923	82.0281	0.229385	7973.17	28.2102	1603.2	54.3058	5879.36	161.56	0	0	16904	758.018	904.8	226.5	15421.8	710.085	0	0	1460.8	24.8902	0	0	0	0	0	0	51693	1077.58
96	178.694	2.7425	565.388	3.41419	0	0	385.996	31.8844	266.922	3.5316	0	0	27.0512	0.400646	77.1926	0.732919	8114.64	40.4598	1761.6	61.094	6636.8	87.7944	0	0	15504	226.274	478.4	176.494	14331.5	142.017	0	0	1390.4	74.6705	0	0	0	0	0	0	49718.6	349.601
102	174.677	2.22015	588.103	6.24724	0	0	389.388	17.463	293.169	3.97795	0	0	26.4045	0.0630888	80.2889	0.95471	8227.63	87.2925	1992	196.859	6241.6	90.9622	0	0	15152	113.137	786.24	235.325	14145	202.881	0	0	1460.8	24.8902	0	0	0	0	0	0	49557.3	406.167
108	147.851	2.91853	593.454	6.3918	0	0	394.727	19.1044	299.461	5.04901	0	0	33.4494	2.99394	77.2924	1.39339	7781.04	88.7394	2150.4	190.07	5235.2	178.304	0	0	14216	33.9411	68.64	17.6494	12925.6	182.593	0	0	1284.8	24.8902	0	0	0	0	0	0	45208	334.167
114	143.206	2.78656	2860.34	4.10263	315.678	85.6699	401.306	36.8023	367.778	2.1603	0	0	60.5137	1.74417	80.5387	0.791346	7879.44	22.3995	1944	142.553	4528.32	78.2909	0	0	14672	158.392	1071.2	108.838	16296.9	121.729	0	0	1654.4	49.7803	0	0	0	0	17.92	25.3427	52293.6	300.917
120	171.992	6.14309	6820.56	131.138	523.854	0.424656	514.1	0.00757392	425.97	7.97321	0	0	100.679	1.0779	123.986	2.43716	9098.75	194.259	1809.6	61.094	5198.08	100.466	0	0	13680	565.685	453.44	294.156	18262.3	60.8644	0	0	2393.6	49.7803	0	0	0	0	0	0	59576.9	693.959
126	120.267	1.80313	11973.1	65.5108	727.602	6.1706	508.588	55.1087	281.533	1.52229	0	0	99.9351	0.703347	83.9916	0.420687	6546.95	38.1014	1963.2	115.4	6565.76	94.1301	0	0	10048	248.902	715.52	17.6494	12079.2	405.763	0	0	1689.6	99.5606	0	0	0	0	0	0	53403.3	517.515
132	98.4363	9.34697	13410.7	886.059	101.523	8.22513	569.825	35.5138	296.881	20.9687	0	0	105.6	6.17433	94.786	7.45363	7003.26	493.522	2438.4	366.564	6018.88	107.254	0	0	12232	395.98	629.2	122.075	12265.7	344.898	0	0	1619.2	49.7803	0	0	0	0	0	0	56884.4	1212.28
138	123.643	8.5735	11500.9	511.329	92.6789	6.7957	633.794	52.2194	344.443	15.9846	0	0	126.183	4.67012	119.295	6.19206	8139.22	407.097	2486.4	230.8	5953.6	154.319	0	0	15384	237.588	599.04	111.779	14446.3	142.017	0	0	2059.2	74.6705	0	0	0	0	0	0	62008.7	775.963
144	150.168	3.11477	13079.4	10.9279	0	0	711.183	64.5604	384.292	3.52482	26.0964	0.318602	110.409	0.94167	130.836	3.58283	9121.29	159.798	2884.8	251.164	4505.6	198.216	0	0	14520	79.196	777.92	164.728	16741.6	304.322	0	0	2164.8	74.6705	0	0	0	0	0	0	65308.4	513.641
150	63.9636	3.6333	4242.44	55.2498	352.477	46.5071	411.361	54.8219	265.056	2.97221	0	0	72.0195	0.391083	84.9144	1.75441	6705.37	89.4187	2836.8	305.47	6623.04	113.59	0	0	12144	45.2548	652.08	69.1268	14962.8	344.898	0	0	1672	24.8902	0	0	0	0	0	0	51088.3	498.856
156	45.5919	1.21449	6064.96	30.853	237.147	5.06331	427.884	47.6605	294.982	2.77609	0	0	62.5519	0.820824	89.1666	1.19381	7711.31	30.7445	2313.6	325.835	8343.36	167.895	450.24	50.6854	12480	181.019	557.44	123.546	15335.8	101.441	0	0	1742.4	24.8902	0	0	0	0	0	0	56156.4	447.295
162	79.2723	1.89901	10460.6	107.787	219.638	2.28416	401.585	50.6127	264.125	2.4257	0	0	90.8244	0.301666	79.4707	1.20126	6957.93	74.0736	2433.6	251.164	5338.88	62.4517	0	0	10456	56.5685	773.76	123.546	14302.8	60.8644	0	0	1848	24.8902	0	0	0	0	0	0	53706.5	330.839
168	38.6003	2.34262	1759.86	16.152	135.746	0.385811	305.78	63.8905	174.453	2.44984	0	0	34.3692	0.849994	65.6819	0.844871	5071.75	65.5234	3585.6	210.435	5961.28	124.451	166.88	61.7728	10864	316.784	953.68	189.731	11720.6	60.8644	0	0	1496	74.6705	0	0	0	0	0	0	42334.3	466.761
174	82.2137	2.66421	393.666	4.82173	0	0	320.061	2.92346	322.695	3.57031	0	0	56.9274	0.223476	82.6399	1.61914	8215.62	105.316	556.8	95.0352	5936	228.989	561.12	64.9407	15496	192.333	1283.36	302.981	15622.7	142.017	0	0	1478.4	99.5606	0	0	0	0	0	0	50408.2	485.491
180	65.7523	0.335725	300.461	1.17191	0	0	293.974	1.18015	315.715	0.991588	0	0	55.1788	0.928838	85.0657	0.118377	8607.07	19.4787	3883.2	115.4	5011.2	89.6046	163.52	57.0211	14784	113.137	1432.39	74.5687	16340	101.441	0	0	1548.8	99.5606	0	0	0	0	0	0	52886.3	252.081
186	45.6131	2.39174	693.385	8.14441	0	0	330.51	58.6457	238.399	4.68004	0	0	35.3505	0.172711	78.904	4.86212	6541.8	68.2627	4468.8	115.4	5124.16	227.632	0	0	12824	11.3137	0	0	14173.7	121.729	0	0	1408	49.7803	0	0	0	0	0	0	45962.7	301.287
192	60.4943	1.80051	310.943	6.37741	0	0	448.477	43.4286	319.998	4.16528	0	0	51.9596	0.440772	83.956	7.89165	7671.9	101.528	2923.2	101.823	5970.56	173.779	436.8	79.196	16384	135.765	0	0	18491.8	60.8644	0	0	1513.6	49.7803	0	0	0	0	0	0	54667.7	289.433
198	59.7757	0.694458	350.109	1.03642	0	0	477.757	47.2815	331.962	1.15776	0	0	47.0757	0.953659	93.544	8.14973	7685.26	101.309	2457.6	244.376	6377.28	156.129	342.72	25.3427	15488	113.137	628.16	241.208	17430.3	20.2881	0	0	1636.8	24.8902	0	0	0	0	0	0	53406.3	411.485
204	63.8868	0.989572	349.941	0.0698706	0	0	355.553	3.10963	308.222	0.698965	0	0	45.8798	1.57805	96.7973	7.16662	7441.98	10.9858	4113.6	251.164	4677.44	162.465	0	0	15648	181.019	877.76	211.793	16971.2	223.17	0	0	1496	24.8902	0	0	0	0	0	0	52446.2	466.597
210	60.9866	2.97025	345.909	3.12141	0	0	387.169	7.8283	319.004	2.43391	0	0	47.5887	0.215147	103.944	9.58815	7411.1	51.0074	4838.4	122.188	4208.32	132.597	0	0	15632	22.6274	919.36	244.15	18606.6	101.441	0	0	1619.2	49.7803	0	0	0	0	0	0	54499.6	328.908
216	60.2625	0.339904	359.81	0.324745	0	0	547.873	61.431	332.006	1.5082	0	0	45.4242	0.0267451	96.6749	7.42716	8115.29	18.4956	4646.4	176.494	5265.6	164.275	0	0	15912	33.9411	1355.12	277.978	18190.6	162.305	0	0	1619.2	49.7803	0	0	0	0	0	0	56546.2	411.77
222	45.2692	1.10654	299.044	0.302937	0	0	483.793	63.0799	317.364	0.37583	0	0	46.5378	0.955819	91.5963	9.00366	8012.04	18.2834	3120	162.917	3490.56	64.2619	0	0	14664	124.451	0	0	16684.3	20.2881	0	0	1531.2	74.6705	0	0	0	0	0	0	48785.7	237.789
228	48.3082	0.904656	400.264	0.181944	0	0	326.781	3.29115	320.079	0.433002	0	0	35.3666	0.141282	95.2421	7.52248	8021.77	170.515	4296	142.553	4354.56	181.019	0	0	14472	79.196	1170	301.51	18420.1	40.5763	0	0	1636.8	24.8902	0	0	0	0	15.36	21.7223	53612.7	426.792
234	42.0599	0.255513	93.5612	0.458606	42.3108	0.911855	247.816	1.18978	301.43	0.112002	0	0	36.5303	0.931863	98.063	8.60342	7953.39	10.8578	4800	108.612	5345.28	134.859	421.12	104.539	14864	158.392	869.44	300.04	17889.3	60.8644	0	0	1566.4	24.8902	0	0	43.68	61.7728	0	0	54614.4	405.412
240	48.7844	3.67363	407.568	7.41716	0	0	168.803	2.59065	297.535	5.13847	12.6116	0.22903	28.1083	1.18715	92.2716	10.8595	7494.49	92.7808	3873.6	115.4	5119.36	188.26	362.88	85.5316	14824	79.196	1123.2	294.156	18090.2	385.475	0	0	1795.2	49.7803	0	0	0	0	0	0	53738.6	555.673
246	66.16	9.67899	717.121	2.27453	0	0	47.7129	0.2663	317.746	1.81649	8.37014	3.94572	60.052	0.409615	82.0564	2.06789	7613.63	17.9888	3892.8	305.47	5329.6	122.641	0	0	16312	214.96	0	0	17918	142.017	0	0	1812.8	24.8902	0	0	0	0	0	0	54178.1	419.279
252	48.4683	1.79397	83.6673	0.793313	52.1383	0.768722	45.1461	0.383283	361.76	0.193872	0	0	42.9283	0.506111	80.8539	1.07711	7909.72	0.525746	4809.6	162.917	4738.56	360.228	558.88	125.13	16944	158.392	763.36	108.838	18721.4	142.017	0	0	1848	24.8902	0	0	0	0	0	0	57008.5	479.262

## Sheet: Table_S6
Table S6. Total soluble carbohydrates measured in stillage and mixed culture fermentation reactor with the anthrone method
	Total Soluble Carbohydrates (mg/L)					Total Soluble Carbohydrates (mgCOD/L)
Sample ID	Rep1	Rep2	Rep3	Avg	Stdev	Avg	Stdev
Stillage_Batch1_Rep1	41294.4	36906	38329.2	38843.2	2238.89	41406.8	2386.66
Stillage_Batch1_Rep2	40701.3	42954.8	39752.5	41136.2	1644.87	43851.2	1753.43
Stillage_Batch2_Rep1	37726.1	37066.3	38122.1	37638.2	533.379	40122.3	568.582
Stillage_Batch2_Rep2	36036.4	37366.2	32445.7	35282.8	2545.35	37611.4	2713.34
Stillage_Combined				38225.1	2587.11	40747.9	2757.86
6	907.538	1267.45	1147.48	1107.49	183.26	1180.59	195.355
12	4422.72	4656.09	4889.46	4656.09	233.371	4963.4	248.773
18	8893.05	9770.46	8564.02	9075.84	623.65	9674.85	664.811
24	11190.5	11190.5	12007.3	11462.7	471.578	12219.3	502.702
30	14252.9	13514.3	17084.1	14950.4	1884.35	15937.1	2008.72
36	16761.4	16389.3	14528.9	15893.2	1196.05	16942.2	1274.99
42	15025	17753.6	15025	15934.6	1575.33	16986.2	1679.3
48	16720.2	17261.2	16720.2	16900.6	312.322	18016	332.936
54	15962.9	16179.3	16395.7	16179.3	216.383	17247.1	230.665
60	15962.9	16071.1	15421.9	15818.6	347.788	16862.7	370.741
66	16468.6	17084.1	16468.6	16673.8	355.348	17774.2	378.801
72	11976.9	12479.1	11474.6	11976.9	502.287	12767.3	535.438
78	12855.9	13860.4	13734.9	13483.7	547.355	14373.6	583.48
84	12283.3	13021.9	14745.3	13350.2	1263.36	14231.3	1346.74
90	11283.4	11163.9	11283.4	11243.5	68.9909	11985.6	73.5443
96	14409.2	12860.7	13118.8	13462.9	829.647	14351.4	884.404
102	11046.5	12021	10924.7	11330.7	600.853	12078.6	640.51
108	12718.9	12246.4	11773.9	12246.4	472.479	13054.7	503.663
114	10802.8	11066.8	9878.98	10582.9	623.699	11281.3	664.863
120	16394.5	16649.1	18176.6	17073.4	963.852	18200.2	1027.47
126	13431.4	13551.4	13671.5	13551.4	120.055	14445.8	127.978
132	14281.1	11704	13121.4	13035.5	1290.71	13895.8	1375.89
138	13159.2	14068.5	13938.6	13722.1	491.809	14627.8	524.268
144	9970.91	9970.91	9704.94	9882.25	153.56	10534.5	163.695
150	9886.26	9487.25	9620.25	9664.59	203.166	10302.4	216.575
156	11109.1	10991	11463.5	11187.9	245.923	11926.3	262.154
162	9691.48	8391.97	9218.93	9100.79	657.762	9701.45	701.174
168	10166.9	10904.5	10658.6	10576.7	375.593	11274.7	400.382
174	11111.1	10406.6	8997.62	10171.8	1076.15	10843.1	1147.18
180	9847.54	10096.3	9723.15	9889	190.006	10541.7	202.546
186	9306.27	9552.16	9798.04	9552.16	245.884	10182.6	262.112
192	9432.8	9304.01	9947.94	9561.58	340.732	10192.6	363.221
198	6671.54	7918.76	7295.15	7295.15	623.611	7776.63	664.769
204	7114.67	6599.53	6599.53	6771.25	297.416	7218.15	317.045
210	9339.01	11487.5	9741.86	10189.5	1142.07	10862	1217.44
216	6921.91	7190.48	7593.33	7235.24	337.939	7712.77	360.243
222	8402.52	7887.38	8273.74	8187.88	268.087	8728.28	285.781
228	8343.85	8576.05	8227.75	8382.55	177.343	8935.8	189.048
234	7255.42	6655.75	6655.75	6855.64	346.22	7308.11	369.071
240	7357.46	8239.02	7861.21	7819.23	442.279	8335.3	471.469
246	6853.71	6853.71	7357.46	7021.63	290.841	7485.05	310.036

## Sheet: Table_S7
Table S7. Total soluble proteins in stillage and mixed culture fermentation reactor measured with the BCA assay
	Total Soluble Proteins (mg/L)					Total Soluble Proteins (mg COD/L)
Sample ID	Rep1	Rep2	Rep3	Avg	Stdev	Avg	Stdev
Stillage_Batch1_Rep1	1542.97	1491.8	1558.71	1531.16	34.9842	2296.74	52.4763
Stillage_Batch1_Rep2	1314.68	1391.43	1523.29	1409.8	105.511	2114.7	158.266
Stillage_Batch2_Rep1	1346.67	1472.04	1423.82	1414.18	63.2395	2121.27	94.8592
Stillage_Batch2_Rep2	1235.49	1189.63	1394.98	1273.37	107.788	1910.05	161.682
Stillage_Combined				1407.12	112.332	2110.69	168.498
12	2001.51	1755.51	1688.6	1815.21	164.777	2722.81	247.166
18	1922.79	1853.91	1889.34	1888.68	34.4449	2833.02	51.6674
24	1957.22	1679.18	1965.98	1867.46	163.113	2801.19	244.67
30	2026.22	1909.53	1987.32	1974.36	59.4142	2961.53	89.1212
36	1898.11	1874.03	1849.94	1874.03	24.0822	2811.04	36.1233
42	1841.19	1843.38	1880.59	1855.05	22.1469	2782.58	33.2203
48	1860.89	1928.76	1955.03	1914.89	48.5773	2872.34	72.8659
54	1825.86	2099.52	2110.47	2011.95	161.251	3017.93	241.877
60	2189.28	2121.42	2095.14	2135.28	48.5773	3202.92	72.8659
66	2084.2	2042.6	2219.93	2115.58	92.7375	3173.37	139.106
72	2009.78	1882.31	1924.11	1938.74	64.9807	2908.1	97.4711
78	1463.67	1506.55	1596.2	1522.14	67.6293	2283.21	101.444
84	1681.59	1604.36	1714.11	1666.69	56.3771	2500.03	84.5656
90	2533.17	2275.59	2307.29	2372.02	140.463	3558.03	210.694
96	2372.08	2237.56	2172.22	2260.62	101.907	3390.94	152.861
102	1851.19	1773.4	1886.19	1836.92	57.7353	2755.39	86.603
108	1707.27	1715.05	1664.49	1695.6	27.227	2543.41	40.8405
114	1508.2	1300.57	1483.29	1430.69	113.368	2146.03	170.052
120	1508.69	1456.61	1362.1	1442.47	74.3104	2163.7	111.466
126	1323.21	1363.08	1412.92	1366.4	44.95	2049.61	67.425
132	1159.28	1179.76	1192.04	1177.03	16.5511	1765.54	24.8266
138	1191.93	1141.93	1069.93	1134.6	61.3259	1701.9	91.9889
144	1006.1	1151.49	1153.31	1103.63	84.4758	1655.45	126.714
150	1069.38	1147.17	1213.3	1143.28	72.0358	1714.93	108.054
156	834.999	931.394	971.086	912.493	69.9847	1368.74	104.977
162	1701.23	1651.11	1550.87	1634.4	76.5578	2451.6	114.837
168	1622.78	1516.01	1590.09	1576.29	54.709	2364.44	82.0634
174	1468.86	1491.92	1522.67	1494.49	26.9958	2241.73	40.4937
180	1390.37	1193.56	1368.84	1317.59	107.951	1976.39	161.927
186	1117.26	1053.84	1117.26	1096.12	36.6126	1644.18	54.919
192	1407.37	1418.9	1403.52	1409.93	8.00088	2114.89	12.0013
198	2271.62	2282.48	2635.57	2396.56	207.064	3594.84	310.596
204	1258.46	1304.65	1258.46	1273.86	26.6712	1910.78	40.0067
210	1507.3	1441.96	1549.58	1499.61	54.2192	2249.42	81.3288
216	1403.52	1568.79	1637.98	1536.76	120.464	2305.15	180.695
222	1338.85	1651.36	1635.33	1541.85	175.981	2312.77	263.972
228	1607.23	1614.92	1465.02	1562.39	84.4112	2343.58	126.617
234	1230.01	1255.68	1206.47	1230.72	24.6139	1846.08	36.9208
240	1255.68	1360.52	1334.85	1317.02	54.6488	1975.53	81.9732
246	1433.12	1420.29	1266.31	1373.24	92.828	2059.86	139.242
252	1549.58	1522.67	1614.92	1562.39	47.4377	2343.58	71.1566

## Sheet: Table_S8
Table S8. Summary of aromatic compounds in stillage
	Vanillamide	4-hydroxybenzyl alcohol	Syringamide	Coumaryl amide	4-hydroxybenzoic acid	Feruloyl amide	Vanillic acid	p-Coumaric acid	Ferulic acid	Benzoic acid
Sample	Concentration (µg COD/L)	Concentration (µg COD/L)	Concentration (µg COD/L)	Concentration (µg COD/L)	Concentration (µg COD/L)	Concentration (µg COD/L)	Concentration (µg COD/L)	Concentration (µg COD/L)	Concentration (µg COD/L)	Concentration (µg COD/L)
Stillage_Batch1_Rep1	435.836	236.02	234.311	12418	387.089	11654.4	324.968	3494.25	241.81	1622.91
Stillage_Batch1_Rep2	437.902	241.198	234.224	12777.6	365.352	11467.6	324.834	3433.57	259.766	1767.13
Stillage_Batch2_Rep1	347.698	106.538	136.607	5289.26	319.495	3186.56	370.9	1049.86	87.4852	2014.96
Stillage_Batch2_Rep2	346.615	109.292	139.807	5581.24	318.846	3303.24	377.407	1097.4	91.9335	2045.41
S1_Avg	436.869	238.609	234.268	12597.8	376.221	11561	324.901	3463.91	250.788	1695.02
S1_stdev	1.46088	3.66133	0.0613257	254.28	15.3704	132.09	0.0945443	42.9063	12.6966	101.98
S2_avg	347.156	107.915	138.207	5435.25	319.17	3244.9	374.154	1073.63	89.7093	2030.18
S2_stdev	0.76532	1.94667	2.26284	206.466	0.459073	82.5092	4.60104	33.612	3.14545	21.5276
