# Supplementary material for: Increasing the economic value of lignocellulosic stillage through medium-chain fatty acid production
Source: Biotechnol Biofuels. 2018 Jul 19;11:200. doi: 10.1186/s13068-018-1193-x (PMC6052542; doi:10.1186/s13068-018-1193-x)
Supplement: Supplementary file 2 — Additional file 2. Rarefied tables of operational taxonomic units (OTUs) and classification with Silva. Table S9. OTU table for 6d experiments testing different pH conditions. Table S10. OTU table for 252 days of reactor operation at pH 5.5. [file 13068_2018_1193_MOESM2_ESM.xlsx]

## Sheet: Table_S9
Table S9. OTU table for 6d experiments testing different pH conditions
pH	Uncontrolled				5.0				5.5				6.0				6.5				Classifcation with Silva Database
Day	0	2	4	6	0	2	4	6	0	2	4	6	0	2	4	6	0	2	4	6
OTU	Seed.pHUnctrl	2d.pHUnctrl	4d.pHUnctrl	6d.pHUntrl	Seed.pH50	2d.pH50	4d.pH50	6d.pH50	Seed.pH55	2d.pH55	4d.pH55	6d.pH55	Seed.pH60	2d.pH60	4d.pH60	6d.pH60	Seed.pH65	2d.pH65	4d.pH65	6d.pH65	Kingdom	Phylum	Class	Order	Family	Genus	Species
denovo6146	23	13584	998	29	10	3028	14140	7302	6	173	7176	7216	2	3070	3197	3100	2	185	80	226	D_0__Bacteria	D_1__Firmicutes	D_2__Bacilli	D_3__Lactobacillales	D_4__Lactobacillaceae	D_5__Lactobacillus	D_6__uncultured bacterium
denovo9883	1	1	0	1	3	0	3	15	2	9	236	6212	1	5	180	416	1	3	6	120	D_0__Bacteria	D_1__Firmicutes	D_2__Clostridia	D_3__Clostridiales	D_4__Eubacteriaceae	D_5__Pseudoramibacter
denovo18072	0	0	0	3	0	0	2	124	2	16	250	6148	1	47	544	1750	1	1	1	1	D_0__Bacteria	D_1__Actinobacteria	D_2__Coriobacteriia	D_3__Coriobacteriales	D_4__Coriobacteriaceae	D_5__Olsenella	D_6__uncultured bacterium
denovo11601	0	0	3	0	0	2	0	9	4	19	983	3752	2	14	2922	7471	1	1	2	1	D_0__Bacteria	D_1__Firmicutes	D_2__Clostridia	D_3__Clostridiales	D_4__Lachnospiraceae	D_5__Acetitomaculum
denovo5505	10	349	16	2	10	444	616	37	12	560	3337	2227	19	1684	2970	536	18	2014	706	412	D_0__Bacteria	D_1__Firmicutes	D_2__Clostridia	D_3__Clostridiales	D_4__Lachnospiraceae	D_5__[Ruminococcus] gauvreauii group	D_6__uncultured bacterium
denovo21272	11	507	31385	27374	0	3	79	88	0	96	464	1630	0	47	80	384	1	71	260	1520	D_0__Bacteria	D_1__Firmicutes	D_2__Bacilli	D_3__Lactobacillales	D_4__Lactobacillaceae	D_5__Lactobacillus	D_6__uncultured bacterium
denovo13525	153	4	2	0	110	19	65	8	62	342	1935	1478	79	346	218	17	105	29	14	6	D_0__Bacteria	D_1__Firmicutes	D_2__Clostridia	D_3__Clostridiales	D_4__Defluviitaleaceae	D_5__Defluviitaleaceae UCG-011	D_6__uncultured bacterium
denovo12732	3	201	1759	8371	0	5	773	683	0	535	276	1376	0	26	25	468	0	324	506	2707	D_0__Bacteria	D_1__Firmicutes	D_2__Bacilli	D_3__Lactobacillales	D_4__Lactobacillaceae	D_5__Lactobacillus	D_6__uncultured bacterium
denovo11326	45	195	11	1	99	79	101	21	53	469	2112	1066	70	439	607	42	45	350	10	1	D_0__Bacteria	D_1__Firmicutes	D_2__Clostridia	D_3__Clostridiales	D_4__Lachnospiraceae	D_5__Lachnospiraceae NK3A20 group
denovo1729	0	0	0	1	0	5	3	5	5	66	430	778	0	130	1581	4750	1	75	51	8	D_0__Bacteria	D_1__Firmicutes	D_2__Negativicutes	D_3__Selenomonadales	D_4__Veillonellaceae	D_5__Mitsuokella	D_6__uncultured organism
denovo13034	2	4	2	1	0	93	61	712	4	982	2126	740	3	1749	4193	3144	13	3249	347	7	D_0__Bacteria	D_1__Firmicutes	D_2__Negativicutes	D_3__Selenomonadales	D_4__Veillonellaceae	D_5__Mitsuokella
denovo19992	8	2339	5229	581	4	44	31	278	1	4	3	701	4	21	26	11	0	0	1	0	D_0__Bacteria	D_1__Firmicutes	D_2__Bacilli	D_3__Lactobacillales	D_4__Lactobacillaceae	D_5__Lactobacillus	D_6__uncultured bacterium
denovo4511	1537	159	5	0	1267	1037	246	29	1819	2771	2000	690	1653	154	53	6	1591	57	14	4	D_0__Bacteria	D_1__Bacteroidetes	D_2__Bacteroidia	D_3__Bacteroidales	D_4__Prevotellaceae	D_5__Prevotella 1	D_6__uncultured bacterium
denovo9986	2	7	5	10	8	54	10725	12237	10	3322	2679	668	14	5359	5945	4648	0	1850	1796	23	D_0__Bacteria	D_1__Firmicutes	D_2__Negativicutes	D_3__Selenomonadales	D_4__Veillonellaceae	D_5__Megasphaera	D_6__uncultured bacterium
denovo10766	0	5	0	2	0	9	3	339	1	34	984	641	3	1203	2074	1645	0	169	618	59	D_0__Bacteria	D_1__Firmicutes	D_2__Negativicutes	D_3__Selenomonadales	D_4__Veillonellaceae	D_5__Dialister	D_6__uncultured bacterium
denovo18930	76	75	5	0	494	318	212	9	512	451	912	591	852	2209	122	12	890	149	12	10	D_0__Bacteria	D_1__Firmicutes	D_2__Clostridia	D_3__Clostridiales	D_4__Lachnospiraceae	D_5__Lachnospiraceae NK3A20 group	D_6__uncultured bacterium
denovo11776	0	1	0	0	1	0	0	3	0	5	84	464	0	12	294	234	0	0	6	120	D_0__Bacteria	D_1__Firmicutes	D_2__Clostridia	D_3__Clostridiales	D_4__Family XIII	D_5__[Eubacterium] nodatum group	D_6__uncultured bacterium
denovo10958	27	13	0	0	21	32	21	6	33	1663	1850	415	20	334	29	1	15	1	0	1	D_0__Bacteria	D_1__Firmicutes	D_2__Clostridia	D_3__Clostridiales	D_4__Ruminococcaceae	D_5__Ruminococcaceae UCG-014	D_6__uncultured bacterium
denovo11192	6	1	0	0	0	41	37	62	1	82	133	394	1	105	475	292	0	27	14	6	D_0__Bacteria	D_1__Actinobacteria	D_2__Coriobacteriia	D_3__Coriobacteriales	D_4__Coriobacteriaceae	D_5__uncultured	D_6__uncultured bacterium
denovo12613	144	1159	33	0	146	586	83	13	127	1492	1630	354	105	2533	15	6	111	45	0	0	D_0__Bacteria	D_1__Bacteroidetes	D_2__Bacteroidia	D_3__Bacteroidales	D_4__Prevotellaceae	D_5__Prevotella 9
denovo4538	0	0	1	0	0	0	2	7	0	16	76	349	0	14	333	898	0	15	38	97	D_0__Bacteria	D_1__Firmicutes	D_2__Erysipelotrichia	D_3__Erysipelotrichales	D_4__Erysipelotrichaceae	D_5__Erysipelotrichaceae UCG-001	D_6__uncultured bacterium
denovo5370	9	14	0	1	6	34	78	2	8	215	470	292	12	48	1633	994	13	30	7	5	D_0__Bacteria	D_1__Firmicutes	D_2__Clostridia	D_3__Clostridiales	D_4__Lachnospiraceae	D_5__Syntrophococcus
denovo21418	0	1	0	0	0	1	0	171	0	22	59	275	0	77	126	191	0	1	21	140	D_0__Bacteria	D_1__Actinobacteria	D_2__Coriobacteriia	D_3__Coriobacteriales	D_4__Coriobacteriaceae	D_5__uncultured
denovo20011	16	25	0	0	9	16	392	224	20	328	211	226	24	1373	689	668	29	853	220	8	D_0__Bacteria	D_1__Firmicutes	D_2__Negativicutes	D_3__Selenomonadales	D_4__Acidaminococcaceae	D_5__Acidaminococcus	D_6__uncultured bacterium
denovo5748	0	0	0	2	0	11	119	4926	7	3597	1485	219	3	2930	1322	115	0	200	213	5	D_0__Bacteria	D_1__Firmicutes	D_2__Negativicutes	D_3__Selenomonadales	D_4__Veillonellaceae	D_5__Megasphaera
denovo21653	4	2	1	0	1	2	2	1	6	144	583	206	0	1	0	0	3	0	0	0	D_0__Bacteria	D_1__Firmicutes	D_2__Clostridia	D_3__Clostridiales	D_4__Ruminococcaceae	D_5__Ruminococcaceae UCG-014
denovo1749	5	16	2	1	14	129	285	1386	7	419	99	165	11	1017	193	141	12	916	652	129	D_0__Bacteria	D_1__Actinobacteria	D_2__Actinobacteria	D_3__Bifidobacteriales	D_4__Bifidobacteriaceae	D_5__Bifidobacterium
denovo20779	0	0	0	0	0	1	2	22	1	373	189	140	1	425	438	404	0	6	12	1	D_0__Bacteria	D_1__Firmicutes	D_2__Negativicutes	D_3__Selenomonadales	D_4__Veillonellaceae	D_5__uncultured
denovo20443	0	0	0	0	0	3	0	13	2	13	51	129	0	47	487	1415	0	2	2	1	D_0__Bacteria	D_1__Actinobacteria	D_2__Coriobacteriia	D_3__Coriobacteriales	D_4__Coriobacteriaceae	D_5__Atopobium
denovo14403	423	115	3	0	423	534	120	23	684	1180	353	127	587	175	31	3	440	3	0	0	D_0__Bacteria	D_1__Bacteroidetes	D_2__Bacteroidia	D_3__Bacteroidales	D_4__Prevotellaceae	D_5__Prevotella 1	D_6__uncultured bacterium
denovo7505	0	11	56	5	0	0	76	62	0	1	22	124	0	1	3	16	0	1	0	5	D_0__Bacteria	D_1__Firmicutes	D_2__Bacilli	D_3__Lactobacillales	D_4__Lactobacillaceae	D_5__Lactobacillus
denovo14622	160	248	20	0	213	726	107	7	139	272	476	110	210	92	12	2	201	60	25	11	D_0__Bacteria	D_1__Firmicutes	D_2__Clostridia	D_3__Clostridiales	D_4__Ruminococcaceae	D_5__Ruminococcaceae NK4A214 group	D_6__uncultured bacterium
denovo17750	6098	124	2	1	5136	13	5	1	6499	2013	547	101	5943	380	39	3	5573	85	27	12	D_0__Bacteria	D_1__Firmicutes	D_2__Erysipelotrichia	D_3__Erysipelotrichales	D_4__Erysipelotrichaceae	D_5__Erysipelotrichaceae UCG-004	D_6__uncultured bacterium
denovo15170	11	30	2	0	2	7	271	1237	13	344	117	101	7	231	95	33	7	137	133	91	D_0__Bacteria	D_1__Proteobacteria	D_2__Betaproteobacteria	D_3__Burkholderiales	D_4__Alcaligenaceae	D_5__Sutterella
denovo3856	0	0	0	0	0	0	0	0	0	0	0	101	0	0	0	0	0	0	0	0	D_0__Bacteria	D_1__Actinobacteria	D_2__Actinobacteria	D_3__Bifidobacteriales	D_4__Bifidobacteriaceae	D_5__Aeriscardovia	D_6__uncultured bacterium
denovo2857	0	2	0	0	1	18	117	1433	4	282	800	96	1	465	2160	76	0	764	222	5	D_0__Bacteria	D_1__Firmicutes	D_2__Negativicutes	D_3__Selenomonadales	D_4__Veillonellaceae	D_5__Mitsuokella
denovo8511	29	18	3	0	14	122	30	1	20	176	197	92	27	167	101	12	32	110	58	10	D_0__Bacteria	D_1__Firmicutes	D_2__Erysipelotrichia	D_3__Erysipelotrichales	D_4__Erysipelotrichaceae	D_5__Erysipelotrichaceae UCG-006	D_6__uncultured bacterium
denovo16940	113	27	1	1	198	187	22	5	115	767	230	73	146	275	20	1	90	104	27	17	D_0__Bacteria	D_1__Firmicutes	D_2__Negativicutes	D_3__Selenomonadales	D_4__Acidaminococcaceae
denovo9300	2	1	0	0	0	5	8	192	0	38	224	71	0	81	344	111	1	72	35	4	D_0__Bacteria	D_1__Firmicutes	D_2__Negativicutes	D_3__Selenomonadales	D_4__Veillonellaceae	D_5__Mitsuokella	D_6__uncultured rumen bacterium
denovo16252	0	128	5	0	0	5	156	82	0	2	32	60	0	40	51	87	0	2	1	0	D_0__Bacteria	D_1__Firmicutes	D_2__Bacilli	D_3__Lactobacillales	D_4__Lactobacillaceae	D_5__Lactobacillus	D_6__uncultured bacterium
denovo21649	0	0	0	0	0	0	1	1	0	0	4	55	0	0	5	6	0	0	0	0	D_0__Bacteria	D_1__Firmicutes	D_2__Bacilli	D_3__Lactobacillales	D_4__Lactobacillaceae	D_5__Lactobacillus
denovo5487	6	3	0	0	2	3	6	3	2	33	38	52	0	13	34	1	0	22	7	5	D_0__Bacteria	D_1__Firmicutes	D_2__Clostridia	D_3__Clostridiales	D_4__Lachnospiraceae	D_5__Roseburia	D_6__uncultured bacterium
denovo2615	0	0	0	0	0	0	0	1	0	0	2	52	0	0	2	12	0	0	0	0	Unassigned						D_6__uncultured Candidatus Saccharibacteria bacterium
denovo3833	0	0	0	0	0	0	0	0	0	0	0	47	0	0	6	48	0	0	0	0	D_0__Bacteria	D_1__Firmicutes	D_2__Clostridia	D_3__Clostridiales	D_4__Lachnospiraceae	D_5__Acetitomaculum
denovo16875	3	3	0	0	1	1	1	0	9	57	146	46	4	4	0	0	4	0	0	0	D_0__Bacteria	D_1__Bacteroidetes	D_2__Bacteroidia	D_3__Bacteroidales	D_4__Bacteroidales S24-7 group	D_5__uncultured bacterium	D_6__uncultured bacterium
denovo11325	1	3	4	0	0	65	2	0	1	257	101	46	4	778	476	11	5	731	446	706	D_0__Bacteria	D_1__Firmicutes	D_2__Erysipelotrichia	D_3__Erysipelotrichales	D_4__Erysipelotrichaceae	D_5__Catenibacterium	D_6__uncultured bacterium
denovo18996	0	7	61	43	0	0	4	1	0	0	12	46	0	3	0	10	0	0	0	1	D_0__Bacteria	D_1__Firmicutes	D_2__Bacilli	D_3__Lactobacillales	D_4__Lactobacillaceae	D_5__Lactobacillus
denovo4148	0	0	0	0	0	12	23	337	0	146	559	44	2	299	1208	1	1	559	52	0	D_0__Bacteria	D_1__Firmicutes	D_2__Negativicutes	D_3__Selenomonadales	D_4__Veillonellaceae	D_5__Mitsuokella	D_6__uncultured bacterium
denovo8879	326	29	1	1	494	205	26	4	436	824	178	42	526	229	17	2	238	161	25	12	D_0__Bacteria	D_1__Firmicutes	D_2__Negativicutes	D_3__Selenomonadales	D_4__Acidaminococcaceae	D_5__Succiniclasticum	D_6__uncultured bacterium
denovo17584	299	8004	239	2	470	2454	403	52	246	1505	597	42	248	2013	48	64	357	45	0	0	D_0__Bacteria	D_1__Bacteroidetes	D_2__Bacteroidia	D_3__Bacteroidales	D_4__Prevotellaceae	D_5__Prevotella 7	D_6__uncultured bacterium
denovo9661	52	13	0	0	37	12	0	0	68	568	124	42	66	1	0	0	46	1	0	0	D_0__Bacteria	D_1__Bacteroidetes	D_2__Bacteroidia	D_3__Bacteroidales	D_4__Prevotellaceae	D_5__uncultured
denovo12090	3	4	0	0	2	1	1	1	1	29	22	42	2	106	24	8	5	82	14	0	D_0__Bacteria	D_1__Firmicutes	D_2__Negativicutes	D_3__Selenomonadales	D_4__Acidaminococcaceae	D_5__Acidaminococcus	D_6__uncultured bacterium
denovo11446	0	0	0	0	0	0	0	3	0	47	28	41	0	51	43	45	0	2	1	0	D_0__Bacteria	D_1__Firmicutes	D_2__Negativicutes	D_3__Selenomonadales	D_4__Veillonellaceae	D_5__uncultured	D_6__uncultured bacterium
denovo11802	113	38	3	0	88	58	15	6	71	234	331	40	145	76	8	1	110	186	18	3	D_0__Bacteria	D_1__Firmicutes	D_2__Clostridia	D_3__Clostridiales	D_4__Lachnospiraceae	D_5__Acetitomaculum	D_6__uncultured bacterium
denovo3077	0	0	0	0	0	0	0	0	0	1	26	40	0	6	38	129	0	1	9	3	D_0__Bacteria	D_1__Firmicutes	D_2__Negativicutes	D_3__Selenomonadales	D_4__Veillonellaceae	D_5__Dialister
denovo11439	0	0	0	0	0	0	0	0	0	0	0	38	0	0	0	2	0	0	0	0	D_0__Bacteria	D_1__Firmicutes	D_2__Clostridia	D_3__Clostridiales	D_4__Eubacteriaceae	D_5__Pseudoramibacter	D_6__uncultured bacterium
denovo12951	0	0	0	0	0	0	0	0	0	35	41	38	0	2	50	106	0	22	29	43	D_0__Bacteria	D_1__Actinobacteria	D_2__Coriobacteriia	D_3__Coriobacteriales	D_4__Coriobacteriaceae	D_5__Atopobium	D_6__uncultured bacterium
denovo534	0	0	0	0	0	0	1	0	0	0	15	38	0	2	19	32	0	0	0	0	D_0__Bacteria	D_1__Firmicutes	D_2__Bacilli	D_3__Lactobacillales	D_4__Lactobacillaceae	D_5__Lactobacillus
denovo18228	7	160	9	0	7	120	26	3	5	188	188	37	10	244	0	0	7	5	0	0	D_0__Bacteria	D_1__Bacteroidetes	D_2__Bacteroidia	D_3__Bacteroidales	D_4__Prevotellaceae	D_5__Prevotella 7	D_6__uncultured bacterium
denovo16922	259	156	4	1	134	106	11	0	325	441	265	36	313	15	1	0	272	31	6	1	D_0__Bacteria	D_1__Bacteroidetes	D_2__Bacteroidia	D_3__Bacteroidales	D_4__Bacteroidales S24-7 group	D_5__uncultured bacterium	D_6__uncultured bacterium
denovo17257	447	24	1	0	712	230	11	2	522	641	241	35	538	17	0	0	518	26	9	2	D_0__Bacteria	D_1__Bacteroidetes	D_2__Bacteroidia	D_3__Bacteroidales	D_4__Rikenellaceae	D_5__Rikenellaceae RC9 gut group	D_6__uncultured bacterium
denovo10386	0	0	0	0	0	1	0	0	0	5	23	35	0	3	75	198	0	3	4	0	D_0__Bacteria	D_1__Firmicutes	D_2__Negativicutes	D_3__Selenomonadales	D_4__Veillonellaceae	D_5__Mitsuokella	D_6__uncultured bacterium
denovo18202	0	0	0	0	0	0	0	12	0	0	2	35	0	1	27	82	0	0	0	0	D_0__Bacteria	D_1__Actinobacteria	D_2__Coriobacteriia	D_3__Coriobacteriales	D_4__Coriobacteriaceae	D_5__Olsenella
denovo7889	0	0	0	0	1	1	0	0	0	14	64	35	1	0	0	0	2	21	0	1	D_0__Bacteria	D_1__Bacteroidetes	D_2__Bacteroidia	D_3__Bacteroidales	D_4__Prevotellaceae	D_5__Prevotella 7	D_6__uncultured Chloroflexi bacterium
denovo6923	0	1	0	0	0	0	413	229	0	142	106	33	2	241	153	212	0	60	84	1	D_0__Bacteria	D_1__Firmicutes	D_2__Negativicutes	D_3__Selenomonadales	D_4__Veillonellaceae	D_5__Megasphaera
denovo4318	232	121	3	0	204	259	32	2	268	311	72	31	161	22	2	0	253	0	1	0	D_0__Bacteria	D_1__Bacteroidetes	D_2__Bacteroidia	D_3__Bacteroidales	D_4__Prevotellaceae	D_5__Prevotella 1	D_6__uncultured bacterium
denovo14775	0	0	0	0	0	0	0	0	0	0	1	31	0	0	7	40	0	0	0	0	D_0__Bacteria	D_1__Actinobacteria	D_2__Coriobacteriia	D_3__Coriobacteriales	D_4__Coriobacteriaceae	D_5__Olsenella
denovo21007	0	2	1	3	0	0	36	21	0	0	5	31	0	1	1	10	0	1	0	3	D_0__Bacteria	D_1__Firmicutes	D_2__Bacilli	D_3__Lactobacillales	D_4__Lactobacillaceae	D_5__Lactobacillus
denovo15201	152	53	0	0	228	104	30	4	163	386	170	30	201	5	1	0	136	18	3	1	D_0__Bacteria	D_1__Bacteroidetes	D_2__Bacteroidia	D_3__Bacteroidales	D_4__Porphyromonadaceae	D_5__Parabacteroides	D_6__uncultured bacterium
denovo1447	0	0	0	0	0	0	0	0	0	0	1	29	0	0	4	2	0	0	0	0	D_0__Bacteria	D_1__Firmicutes	D_2__Clostridia	D_3__Clostridiales	D_4__Lachnospiraceae	D_5__[Ruminococcus] gauvreauii group	D_6__uncultured bacterium
denovo18164	0	0	0	0	0	0	0	0	0	0	6	28	0	0	17	19	0	0	0	0	D_0__Bacteria	D_1__Firmicutes	D_2__Clostridia	D_3__Clostridiales	D_4__Lachnospiraceae	D_5__Acetitomaculum
denovo19089	0	1	0	0	0	0	0	0	0	0	0	28	0	0	0	0	0	0	0	0	D_0__Bacteria	D_1__Firmicutes	D_2__Bacilli	D_3__Lactobacillales	D_4__Lactobacillaceae	D_5__Lactobacillus	D_6__uncultured bacterium
denovo6152	0	0	1	0	0	0	0	0	0	0	6	28	0	0	12	37	0	0	0	0	D_0__Bacteria	D_1__Firmicutes
denovo9537	16	3	0	0	26	31	6	0	10	31	67	27	11	16	6	0	9	27	7	2	D_0__Bacteria	D_1__Bacteroidetes	D_2__Bacteroidia	D_3__Bacteroidales	D_4__Rikenellaceae	D_5__Rikenellaceae RC9 gut group	D_6__uncultured bacterium
denovo2744	0	0	0	0	0	0	0	0	0	0	1	27	0	0	8	38	0	0	0	0	D_0__Bacteria	D_1__Firmicutes	D_2__Clostridia	D_3__Clostridiales	D_4__Lachnospiraceae	D_5__Acetitomaculum
denovo4219	0	0	0	0	0	0	0	1	0	0	0	27	0	0	0	1	0	0	0	0	D_0__Bacteria	D_1__Firmicutes	D_2__Clostridia	D_3__Clostridiales	D_4__Eubacteriaceae	D_5__Pseudoramibacter
denovo12458	0	0	0	0	0	0	0	0	0	1	12	26	0	0	0	10	0	1	0	0	D_0__Bacteria	D_1__Firmicutes	D_2__Negativicutes	D_3__Selenomonadales	D_4__Veillonellaceae	D_5__Dialister
denovo14240	0	0	0	0	0	0	0	0	0	0	1	26	0	0	0	0	0	0	0	0	D_0__Bacteria	D_1__Firmicutes	D_2__Clostridia	D_3__Clostridiales	D_4__Eubacteriaceae	D_5__Pseudoramibacter
denovo1735	0	0	0	0	0	0	0	2	0	0	0	26	0	0	1	2	0	0	0	0	D_0__Bacteria	D_1__Actinobacteria	D_2__Coriobacteriia	D_3__Coriobacteriales	D_4__Coriobacteriaceae	D_5__Olsenella	D_6__uncultured bacterium
denovo2041	0	0	0	0	0	0	1	0	0	24	165	26	0	2	6	1	0	1	1	0	D_0__Bacteria	D_1__Firmicutes	D_2__Clostridia	D_3__Clostridiales	D_4__Lachnospiraceae	D_5__Lachnospira	D_6__uncultured bacterium
denovo727	0	0	0	0	0	1	2	1	0	2	12	26	0	2	46	88	0	1	1	0	D_0__Bacteria	D_1__Firmicutes	D_2__Negativicutes	D_3__Selenomonadales	D_4__Veillonellaceae	D_5__Mitsuokella	D_6__uncultured bacterium
denovo11888	0	6	0	0	0	2	1	3	0	0	5	25	0	3	10	32	0	0	0	0	D_0__Bacteria	D_1__Firmicutes	D_2__Bacilli	D_3__Lactobacillales	D_4__Lactobacillaceae	D_5__Lactobacillus
denovo20476	0	0	1	0	0	0	0	1	0	1	17	25	0	5	13	28	0	0	0	0	D_0__Bacteria	D_1__Firmicutes	D_2__Negativicutes	D_3__Selenomonadales	D_4__Veillonellaceae	D_5__Mitsuokella	D_6__uncultured bacterium
denovo4683	0	0	0	0	0	0	0	0	0	0	3	25	0	0	4	10	0	0	0	0	D_0__Bacteria	D_1__Actinobacteria	D_2__Coriobacteriia	D_3__Coriobacteriales	D_4__Coriobacteriaceae		D_6__uncultured bacterium
denovo17549	168	8	1	0	524	103	50	10	283	123	88	24	427	7	2	1	393	68	19	7	D_0__Bacteria	D_1__Firmicutes	D_2__Clostridia	D_3__Clostridiales	D_4__Ruminococcaceae	D_5__Ruminiclostridium
denovo11651	0	0	0	0	0	0	1	0	0	0	2	24	0	0	2	4	0	0	0	0	D_0__Bacteria	D_1__Firmicutes	D_2__Bacilli	D_3__Lactobacillales	D_4__Lactobacillaceae	D_5__Lactobacillus	D_6__uncultured bacterium
denovo4079	2	6	0	0	17	103	26	18	3	121	54	23	4	81	152	15	5	69	26	1	D_0__Bacteria	D_1__Firmicutes	D_2__Erysipelotrichia	D_3__Erysipelotrichales	D_4__Erysipelotrichaceae		D_6__uncultured beta proteobacterium
denovo18777	0	0	0	0	0	0	0	0	0	0	10	23	0	0	16	28	0	0	0	0	D_0__Bacteria	D_1__Firmicutes	D_2__Clostridia	D_3__Clostridiales	D_4__Lachnospiraceae	D_5__Acetitomaculum
denovo19995	0	0	0	0	0	1	13	0	0	0	23	23	0	3	10	2	0	1	0	0	D_0__Bacteria	D_1__Firmicutes	D_2__Clostridia	D_3__Clostridiales	D_4__Lachnospiraceae	D_5__Blautia
denovo16375	20	4	0	0	4	1	4	0	29	1207	51	22	20	92	16	1	25	0	0	0	D_0__Bacteria	D_1__Tenericutes	D_2__Mollicutes	D_3__Mollicutes RF9	D_4__uncultured bacterium	D_5__uncultured bacterium	D_6__uncultured rumen bacterium
denovo11975	4	344	838	4293	1	1	2	85	0	16	28	22	15	55	99	175	2	126	159	183	D_0__Bacteria	D_1__Proteobacteria	D_2__Alphaproteobacteria	D_3__Rhodospirillales	D_4__Acetobacteraceae	D_5__Acetobacter	D_6__Enterococcus mundtii
denovo16012	1	3	0	0	1	6	1	0	2	78	31	22	1	75	5	0	3	4	0	0	D_0__Bacteria	D_1__Bacteroidetes	D_2__Bacteroidia	D_3__Bacteroidales	D_4__Prevotellaceae	D_5__Prevotella	D_6__uncultured rumen bacterium
denovo16367	1	0	0	0	0	0	0	1	0	1	20	22	0	6	84	11	0	37	12	19	D_0__Bacteria	D_1__Firmicutes	D_2__Clostridia	D_3__Clostridiales	D_4__Lachnospiraceae	D_5__Syntrophococcus
denovo7412	0	0	0	0	0	0	0	0	0	0	0	22	0	0	2	1	0	0	0	0	D_0__Bacteria	D_1__Firmicutes	D_2__Clostridia	D_3__Clostridiales	D_4__Lachnospiraceae	D_5__Blautia
denovo18696	0	0	0	0	0	0	0	0	0	0	5	21	0	0	6	14	0	0	0	0	D_0__Bacteria	D_1__Firmicutes	D_2__Clostridia	D_3__Clostridiales	D_4__Lachnospiraceae		D_6__uncultured bacterium
denovo268	0	0	0	0	0	0	0	12	0	0	18	21	0	8	57	152	0	2	3	1	D_0__Bacteria	D_1__Firmicutes	D_2__Negativicutes	D_3__Selenomonadales	D_4__Veillonellaceae	D_5__Dialister	D_6__uncultured bacterium
denovo11010	47	40	1	0	61	21	6	0	45	89	111	20	44	102	3	0	36	12	4	0	D_0__Bacteria	D_1__Bacteroidetes	D_2__Bacteroidia	D_3__Bacteroidales	D_4__Prevotellaceae	D_5__Prevotellaceae UCG-004	D_6__uncultured bacterium
denovo9465	19	4	0	0	17	6	0	0	6	39	81	20	7	7	0	0	13	3	0	0	D_0__Bacteria	D_1__Bacteroidetes	D_2__Bacteroidia	D_3__Bacteroidales	D_4__uncultured	D_5__uncultured bacterium	D_6__uncultured bacterium
denovo12078	6	1	0	0	5	12	2	0	4	121	84	20	5	1	0	0	7	7	0	0	D_0__Bacteria	D_1__Firmicutes	D_2__Erysipelotrichia	D_3__Erysipelotrichales	D_4__Erysipelotrichaceae	D_5__Solobacterium
denovo13124	0	0	0	0	0	0	0	0	0	0	0	20	0	0	0	3	0	0	0	0	D_0__Bacteria	D_1__Firmicutes	D_2__Clostridia	D_3__Clostridiales	D_4__Eubacteriaceae	D_5__Pseudoramibacter	D_6__uncultured bacterium
denovo19614	0	0	0	0	0	0	0	0	0	0	1	20	0	0	0	0	0	0	0	0	D_0__Bacteria	D_1__Firmicutes	D_2__Bacilli	D_3__Lactobacillales	D_4__Lactobacillaceae	D_5__Lactobacillus
denovo22186	0	0	0	0	0	0	0	0	0	0	0	20	0	0	0	0	0	0	0	0	D_0__Bacteria	D_1__Firmicutes	D_2__Bacilli	D_3__Lactobacillales	D_4__Lactobacillaceae	D_5__Lactobacillus	D_6__uncultured bacterium
denovo3498	0	0	0	0	0	0	0	0	0	0	0	20	0	0	0	1	0	0	0	0	D_0__Bacteria	D_1__Firmicutes	D_2__Clostridia	D_3__Clostridiales	D_4__Lachnospiraceae	D_5__Acetitomaculum
denovo8159	0	0	0	0	0	2	97	58	0	30	68	20	0	62	121	125	0	23	22	0	D_0__Bacteria	D_1__Firmicutes	D_2__Negativicutes	D_3__Selenomonadales	D_4__Veillonellaceae	D_5__Megasphaera	D_6__uncultured bacterium
denovo9619	0	1	0	0	0	3	2	1	0	0	14	20	0	3	10	11	0	0	0	1	D_0__Bacteria	D_1__Firmicutes	D_2__Bacilli	D_3__Lactobacillales	D_4__Lactobacillaceae	D_5__Lactobacillus	D_6__uncultured bacterium
denovo1489	25	35	0	0	55	66	26	2	31	19	86	19	49	24	3	0	46	12	10	4	D_0__Bacteria	D_1__Firmicutes	D_2__Clostridia	D_3__Clostridiales	D_4__Ruminococcaceae	D_5__Ruminococcaceae UCG-005
denovo21576	0	43	13	0	0	0	5	29	0	0	0	19	0	0	0	0	0	0	0	0	D_0__Bacteria	D_1__Firmicutes	D_2__Bacilli	D_3__Lactobacillales	D_4__Lactobacillaceae	D_5__Lactobacillus	D_6__uncultured Aeromonas sp.
denovo14417	0	1	0	0	1	1	0	0	1	98	80	18	0	50	22	0	1	10	3	0	D_0__Bacteria	D_1__Proteobacteria	D_2__Gammaproteobacteria	D_3__Aeromonadales	D_4__Succinivibrionaceae	D_5__Anaerobiospirillum	D_6__uncultured bacterium
denovo800	0	0	0	0	0	0	0	0	0	0	1	18	0	0	1	3	0	0	0	0	D_0__Bacteria	D_1__Actinobacteria	D_2__Coriobacteriia	D_3__Coriobacteriales	D_4__Coriobacteriaceae	D_5__Olsenella
denovo4760	0	0	0	0	0	0	1	0	0	0	8	17	0	0	1	0	0	0	0	0	Unassigned
denovo5680	0	0	0	0	0	0	0	0	0	0	0	17	0	0	0	0	0	0	0	0	D_0__Bacteria	D_1__Actinobacteria	D_2__Coriobacteriia	D_3__Coriobacteriales	D_4__Coriobacteriaceae	D_5__Olsenella
denovo12580	0	41	11	0	0	0	3	17	0	0	0	16	0	0	1	1	0	0	0	0	D_0__Bacteria	D_1__Firmicutes	D_2__Bacilli	D_3__Lactobacillales	D_4__Lactobacillaceae	D_5__Lactobacillus	D_6__uncultured bacterium
denovo13152	0	0	0	0	0	0	0	0	0	0	6	16	0	0	7	7	0	0	0	0	D_0__Bacteria	D_1__Firmicutes	D_2__Clostridia	D_3__Clostridiales	D_4__Lachnospiraceae	D_5__[Ruminococcus] gauvreauii group
denovo14519	0	0	0	0	0	0	0	1	0	0	0	16	0	0	0	0	0	0	0	0	Unassigned						D_6__uncultured bacterium
denovo19230	0	0	0	0	0	1	8	36	0	2	40	16	0	15	43	67	0	3	0	0	D_0__Bacteria	D_1__Firmicutes	D_2__Negativicutes	D_3__Selenomonadales	D_4__Veillonellaceae	D_5__Mitsuokella	D_6__uncultured bacterium
denovo21046	0	10	0	0	3	14	1	0	1	608	152	16	1	131	4	1	0	6	0	0	D_0__Bacteria	D_1__Bacteroidetes	D_2__Bacteroidia	D_3__Bacteroidales	D_4__Prevotellaceae	D_5__Prevotella	D_6__uncultured bacterium
denovo3064	0	0	0	0	0	0	0	32	0	42	16	16	0	30	10	6	0	1	2	1	D_0__Bacteria	D_1__Firmicutes	D_2__Negativicutes	D_3__Selenomonadales	D_4__Veillonellaceae	D_5__Megasphaera
denovo7436	0	0	0	0	0	0	0	0	0	0	0	16	0	0	1	2	0	0	0	0	D_0__Bacteria	D_1__Firmicutes	D_2__Clostridia	D_3__Clostridiales	D_4__Eubacteriaceae	D_5__Pseudoramibacter	D_6__uncultured bacterium
denovo4800	0	0	0	0	0	0	0	0	0	0	0	15	0	0	0	0	0	0	0	3	D_0__Bacteria	D_1__Firmicutes	D_2__Bacilli	D_3__Lactobacillales	D_4__Lactobacillaceae	D_5__Lactobacillus	D_6__uncultured Comamonadaceae bacterium
denovo12460	0	0	0	0	0	0	0	0	0	0	5	14	0	0	3	11	0	0	0	0	D_0__Bacteria	D_1__Firmicutes	D_2__Bacilli	D_3__Lactobacillales	D_4__Lactobacillaceae	D_5__Lactobacillus
denovo20725	0	0	0	0	0	0	0	0	0	0	0	14	0	0	0	4	0	0	0	1	D_0__Bacteria	D_1__Firmicutes	D_2__Clostridia	D_3__Clostridiales	D_4__Eubacteriaceae	D_5__Pseudoramibacter	D_6__uncultured bacterium
denovo8764	0	0	0	0	0	0	0	0	0	0	9	14	0	0	14	9	0	0	1	0	D_0__Bacteria	D_1__Firmicutes	D_2__Clostridia	D_3__Clostridiales	D_4__Lachnospiraceae	D_5__[Ruminococcus] gauvreauii group	D_6__uncultured bacterium
denovo9207	0	0	0	0	0	0	0	0	0	0	9	14	0	2	22	60	0	2	1	1	D_0__Bacteria	D_1__Firmicutes	D_2__Negativicutes	D_3__Selenomonadales	D_4__Veillonellaceae	D_5__Mitsuokella
denovo13995	0	0	0	0	0	0	0	0	0	0	1	13	0	0	0	1	0	0	0	0	D_0__Bacteria	D_1__Firmicutes	D_2__Bacilli	D_3__Lactobacillales	D_4__Lactobacillaceae	D_5__Lactobacillus	D_6__uncultured bacterium
denovo17927	0	0	0	0	0	0	0	0	0	0	0	13	0	0	0	1	0	0	0	0	D_0__Bacteria	D_1__Firmicutes	D_2__Clostridia	D_3__Clostridiales	D_4__Lachnospiraceae	D_5__Acetitomaculum	D_6__uncultured bacterium
denovo2167	0	0	0	0	0	0	0	0	0	0	2	13	0	0	6	30	0	0	0	0	Unassigned						D_6__uncultured bacterium
denovo22102	0	1	0	0	0	5	3	0	0	0	12	13	0	5	8	2	0	0	0	1	D_0__Bacteria	D_1__Firmicutes	D_2__Bacilli	D_3__Lactobacillales	D_4__Lactobacillaceae	D_5__Lactobacillus	D_6__uncultured bacterium
denovo8979	0	0	0	0	0	0	0	0	0	0	0	13	0	0	0	0	0	0	0	0	D_0__Bacteria	D_1__Firmicutes	D_2__Clostridia	D_3__Clostridiales	D_4__Eubacteriaceae	D_5__Pseudoramibacter
denovo20432	106	2	0	0	291	2	1	0	190	96	44	12	174	24	1	0	164	10	2	1	Unassigned						D_6__uncultured bacterium
denovo18866	0	0	0	0	0	0	0	0	0	0	0	11	0	0	0	1	0	0	0	0	D_0__Bacteria	D_1__Actinobacteria	D_2__Coriobacteriia	D_3__Coriobacteriales	D_4__Coriobacteriaceae	D_5__Olsenella
denovo2261	0	0	0	0	0	0	0	0	0	0	1	11	0	0	0	0	0	0	0	0	D_0__Bacteria	D_1__Firmicutes	D_2__Clostridia	D_3__Clostridiales	D_4__Lachnospiraceae	D_5__Acetitomaculum
denovo7048	0	0	0	0	0	0	0	0	0	0	0	11	0	0	0	11	0	0	0	0	Unassigned						D_6__uncultured bacterium
denovo8715	0	0	0	0	0	0	1	9	0	0	6	11	0	10	14	18	0	0	1	0	D_0__Bacteria	D_1__Firmicutes	D_2__Negativicutes	D_3__Selenomonadales	D_4__Veillonellaceae	D_5__Dialister
denovo1648	24	14	1	0	62	58	3	0	57	245	18	10	63	1	0	0	36	1	0	0	Unassigned						D_6__uncultured bacterium
denovo8944	8	7	1	0	4	3	1	1	12	11	5	10	10	11	474	600	7	1	1	2	D_0__Bacteria	D_1__Firmicutes	D_2__Clostridia	D_3__Clostridiales	D_4__Lachnospiraceae	D_5__Roseburia
denovo11947	0	0	0	0	0	0	0	0	0	0	0	10	0	0	1	0	0	0	0	0	D_0__Bacteria	D_1__Firmicutes	D_2__Clostridia	D_3__Clostridiales	D_4__Lachnospiraceae	D_5__[Ruminococcus] gauvreauii group	D_6__uncultured bacterium
denovo19048	0	1	3	0	0	6	6	229	0	12	21	10	3	66	122	365	1	77	258	325	D_0__Bacteria	D_1__Firmicutes	D_2__Negativicutes	D_3__Selenomonadales	D_4__Veillonellaceae	D_5__Dialister
denovo2061	0	0	0	1	0	0	0	0	0	0	1	10	0	0	0	1	0	0	0	0	Unassigned
denovo11965	184	7931	282	7	213	2036	514	74	188	3485	19	9	157	5203	289	57	145	581	1	2	D_0__Bacteria	D_1__Bacteroidetes	D_2__Bacteroidia	D_3__Bacteroidales	D_4__Prevotellaceae	D_5__Prevotella 7
denovo7892	1	55	90	59	0	0	2	147	0	6	8	9	4	10	9	18	0	1	5	22	D_0__Bacteria	D_1__Proteobacteria	D_2__Alphaproteobacteria	D_3__Rhodospirillales	D_4__Acetobacteraceae	D_5__Acetobacter	D_6__uncultured bacterium
denovo10595	0	0	0	0	0	0	0	0	0	0	7	9	0	0	13	38	0	2	0	0	D_0__Bacteria	D_1__Firmicutes	D_2__Erysipelotrichia	D_3__Erysipelotrichales	D_4__Erysipelotrichaceae	D_5__Erysipelotrichaceae UCG-001
denovo12339	0	1	0	0	0	0	2	0	0	0	5	9	0	4	6	1	0	0	0	0	D_0__Bacteria	D_1__Firmicutes	D_2__Bacilli	D_3__Lactobacillales	D_4__Lactobacillaceae	D_5__Lactobacillus	D_6__uncultured bacterium
denovo20921	0	0	0	0	0	0	0	0	0	1	5	9	0	8	4	1	0	0	0	0	D_0__Bacteria	D_1__Actinobacteria	D_2__Coriobacteriia	D_3__Coriobacteriales	D_4__Coriobacteriaceae	D_5__Enterorhabdus	D_6__uncultured bacterium
denovo5101	0	0	0	0	0	1	1	0	2	21	17	9	5	1	0	0	2	0	1	0	D_0__Bacteria	D_1__Firmicutes	D_2__Erysipelotrichia	D_3__Erysipelotrichales	D_4__Erysipelotrichaceae	D_5__Solobacterium
denovo5998	0	0	0	0	0	0	0	1	0	3	8	9	0	8	12	4	0	10	0	0	D_0__Bacteria	D_1__Firmicutes	D_2__Negativicutes	D_3__Selenomonadales	D_4__Veillonellaceae	D_5__uncultured	D_6__uncultured bacterium
denovo8046	0	0	0	0	0	0	0	0	0	2	10	9	0	0	0	0	0	0	0	0	D_0__Bacteria	D_1__Firmicutes	D_2__Bacilli	D_3__Lactobacillales	D_4__Lactobacillaceae	D_5__Lactobacillus	D_6__uncultured bacterium
denovo870	0	0	0	0	0	0	0	0	0	0	6	9	0	1	33	78	0	5	0	0	D_0__Bacteria	D_1__Firmicutes	D_2__Negativicutes	D_3__Selenomonadales	D_4__Veillonellaceae	D_5__Mitsuokella	D_6__uncultured bacterium
denovo985	0	0	0	0	0	0	0	0	0	0	0	9	0	0	11	19	0	0	0	0	D_0__Bacteria	D_1__Firmicutes	D_2__Clostridia	D_3__Clostridiales	D_4__Lachnospiraceae	D_5__Acetitomaculum
denovo14337	218	25	0	0	298	0	0	0	240	86	24	8	274	44	1	1	162	6	4	0	D_0__Bacteria	D_1__Firmicutes	D_2__Erysipelotrichia	D_3__Erysipelotrichales	D_4__Erysipelotrichaceae	D_5__Erysipelotrichaceae UCG-004	D_6__uncultured bacterium
denovo4379	132	48	5	0	70	48	14	3	85	27	9	8	99	28	2	0	90	18	11	3	D_0__Bacteria	D_1__Firmicutes	D_2__Clostridia	D_3__Clostridiales	D_4__Ruminococcaceae	D_5__Ruminococcaceae UCG-014	D_6__uncultured bacterium
denovo21771	14	24	1	0	12	4	13	41	7	79	55	8	11	58	0	0	7	47	11	0	D_0__Bacteria	D_1__Proteobacteria	D_2__Betaproteobacteria	D_3__Burkholderiales	D_4__Alcaligenaceae	D_5__Sutterella	D_6__uncultured bacterium
denovo6660	12	3	0	0	9	60	7	0	9	29	58	8	13	4	2	0	10	4	0	1	D_0__Bacteria	D_1__Firmicutes	D_2__Erysipelotrichia	D_3__Erysipelotrichales	D_4__Erysipelotrichaceae	D_5__Erysipelotrichaceae UCG-006
denovo11014	0	0	0	0	0	0	0	0	0	0	0	8	0	0	2	1	0	0	0	0	D_0__Bacteria	D_1__Firmicutes	D_2__Clostridia	D_3__Clostridiales	D_4__Lachnospiraceae	D_5__Acetitomaculum	D_6__uncultured bacterium
denovo11380	0	0	0	0	0	0	0	0	0	0	0	8	0	0	0	0	0	0	0	0	D_0__Bacteria	D_1__Actinobacteria	D_2__Coriobacteriia	D_3__Coriobacteriales	D_4__Coriobacteriaceae	D_5__Olsenella	D_6__uncultured bacterium
denovo12830	0	0	0	0	0	0	0	0	0	0	0	8	0	0	0	2	0	0	0	0	D_0__Bacteria	D_1__Firmicutes	D_2__Bacilli	D_3__Lactobacillales	D_4__Lactobacillaceae	D_5__Lactobacillus
denovo13761	0	8	0	0	0	1	2	2	0	1	2	8	0	3	9	11	0	1	0	0	D_0__Bacteria	D_1__Firmicutes	D_2__Bacilli	D_3__Lactobacillales	D_4__Lactobacillaceae	D_5__Lactobacillus
denovo15609	0	0	0	0	0	0	0	0	0	0	0	8	0	0	0	0	0	0	0	0	Unassigned						D_6__uncultured bacterium
denovo15918	0	0	0	0	0	0	0	1	0	0	17	8	0	4	5	5	0	0	0	0	D_0__Bacteria	D_1__Firmicutes	D_2__Bacilli	D_3__Lactobacillales	D_4__Lactobacillaceae	D_5__Lactobacillus	D_6__uncultured bacterium
denovo16492	0	0	0	0	0	0	0	0	0	0	1	8	0	0	3	7	0	0	0	0	D_0__Bacteria	D_1__Firmicutes	D_2__Clostridia	D_3__Clostridiales	D_4__Lachnospiraceae	D_5__Blautia	D_6__uncultured bacterium
denovo19168	0	0	0	0	0	0	0	1	0	0	7	8	0	6	31	19	0	14	1	0	Unassigned						D_6__uncultured bacterium
denovo3056	0	0	0	0	0	0	0	0	0	0	2	8	0	0	1	8	0	0	0	0	D_0__Bacteria	D_1__Firmicutes	D_2__Negativicutes	D_3__Selenomonadales	D_4__Veillonellaceae	D_5__Mitsuokella
denovo4759	0	0	0	0	0	0	0	0	0	0	6	8	0	0	0	3	0	0	0	0	D_0__Bacteria	D_1__Firmicutes	D_2__Clostridia	D_3__Clostridiales	D_4__Lachnospiraceae		D_6__uncultured bacterium
denovo7289	0	0	0	0	0	0	0	0	0	0	6	8	0	0	2	0	0	0	0	0	D_0__Bacteria	D_1__Actinobacteria	D_2__Coriobacteriia	D_3__Coriobacteriales	D_4__Coriobacteriaceae	D_5__Olsenella
denovo8267	0	0	0	0	0	0	2	0	0	0	5	8	0	1	0	0	0	0	0	0	D_0__Bacteria	D_1__Firmicutes	D_2__Clostridia	D_3__Clostridiales	D_4__Lachnospiraceae	D_5__Blautia	D_6__uncultured bacterium
denovo8492	0	0	0	0	0	0	0	0	0	0	0	8	0	0	1	3	0	0	0	0	D_0__Bacteria	D_1__Firmicutes	D_2__Negativicutes	D_3__Selenomonadales	D_4__Veillonellaceae
denovo8638	10	0	0	0	13	4	1	0	9	1550	107	7	18	176	2	0	13	3	0	0	D_0__Bacteria	D_1__Proteobacteria	D_2__Deltaproteobacteria	D_3__Desulfovibrionales	D_4__Desulfovibrionaceae	D_5__Desulfovibrio	D_6__uncultured bacterium
denovo10013	2	4	5	2	2	11	2681	1308	0	26	24	7	0	57	135	11	4	590	3577	2391	D_0__Bacteria	D_1__Firmicutes	D_2__Negativicutes	D_3__Selenomonadales	D_4__Veillonellaceae	D_5__Megasphaera
denovo10391	2	2	0	0	0	37	85	133	2	76	16	7	2	164	28	3	3	54	34	11	D_0__Bacteria	D_1__Actinobacteria	D_2__Actinobacteria	D_3__Bifidobacteriales	D_4__Bifidobacteriaceae	D_5__Bifidobacterium	D_6__uncultured bacterium
denovo619	1	0	0	0	0	0	0	0	0	28	54	7	0	11	9	1	0	55	36	14	D_0__Bacteria	D_1__Actinobacteria	D_2__Coriobacteriia	D_3__Coriobacteriales	D_4__Coriobacteriaceae	D_5__uncultured
denovo10690	0	0	0	0	0	0	0	5	0	0	8	7	0	6	7	10	0	0	0	0	D_0__Bacteria	D_1__Firmicutes	D_2__Bacilli	D_3__Lactobacillales	D_4__Lactobacillaceae	D_5__Lactobacillus
denovo10971	0	0	0	0	0	1	0	34	0	27	16	7	0	37	56	17	0	2	1	1	D_0__Bacteria	D_1__Firmicutes	D_2__Negativicutes	D_3__Selenomonadales	D_4__Veillonellaceae	D_5__uncultured	D_6__uncultured bacterium
denovo11657	0	0	0	0	0	0	0	0	0	0	0	7	0	0	0	0	0	0	0	0	D_0__Bacteria	D_1__Firmicutes	D_2__Bacilli	D_3__Lactobacillales	D_4__Lactobacillaceae	D_5__Lactobacillus	D_6__uncultured bacterium
denovo13464	0	0	0	0	0	2	2	18	0	9	50	7	0	18	72	5	0	28	5	0	D_0__Bacteria	D_1__Firmicutes	D_2__Negativicutes	D_3__Selenomonadales	D_4__Veillonellaceae	D_5__Mitsuokella
denovo13689	0	0	0	0	0	0	0	0	0	0	0	7	0	0	0	1	0	0	0	0	D_0__Bacteria	D_1__Firmicutes	D_2__Bacilli	D_3__Lactobacillales	D_4__Lactobacillaceae	D_5__Lactobacillus
denovo14368	0	0	1	0	0	0	217	2227	3	14	27	7	1	29	141	1232	0	38	1196	539	D_0__Bacteria	D_1__Firmicutes	D_2__Negativicutes	D_3__Selenomonadales	D_4__Acidaminococcaceae	D_5__Acidaminococcus
denovo14812	0	0	0	0	0	0	0	0	0	0	3	7	0	0	4	10	0	1	1	0	D_0__Bacteria	D_1__Firmicutes	D_2__Negativicutes	D_3__Selenomonadales	D_4__Veillonellaceae	D_5__Mitsuokella	D_6__uncultured bacterium
denovo15313	0	1	0	0	0	0	2	3	0	1	13	7	0	7	14	13	0	2	1	0	D_0__Bacteria	D_1__Firmicutes	D_2__Bacilli	D_3__Lactobacillales	D_4__Lactobacillaceae	D_5__Lactobacillus	D_6__uncultured bacterium
denovo18240	0	0	0	0	0	0	0	1	0	0	5	7	0	0	3	18	0	0	0	0	D_0__Bacteria	D_1__Firmicutes	D_2__Bacilli	D_3__Lactobacillales	D_4__Lactobacillaceae	D_5__Lactobacillus	D_6__uncultured bacterium
denovo22120	0	0	0	0	0	0	0	0	0	0	0	7	0	0	0	5	0	0	0	0	D_0__Bacteria	D_1__Actinobacteria	D_2__Coriobacteriia	D_3__Coriobacteriales	D_4__Coriobacteriaceae	D_5__uncultured	D_6__uncultured bacterium
denovo2270	0	0	0	0	0	0	0	0	0	0	0	7	0	0	0	0	0	0	0	0	D_0__Bacteria	D_1__Firmicutes	D_2__Clostridia	D_3__Clostridiales	D_4__Eubacteriaceae	D_5__Pseudoramibacter	D_6__uncultured bacterium
denovo3595	0	0	0	0	0	0	0	0	0	18	13	7	0	10	27	7	0	1	0	0	D_0__Bacteria	D_1__Firmicutes	D_2__Negativicutes	D_3__Selenomonadales	D_4__Veillonellaceae	D_5__Mitsuokella
denovo3608	0	1	0	0	2	2	0	0	1	1	3	7	0	8	6	1	6	1	0	0	D_0__Bacteria	D_1__Firmicutes	D_2__Clostridia	D_3__Clostridiales	D_4__Family XIII	D_5__[Eubacterium] nodatum group	D_6__uncultured bacterium
denovo5721	0	0	1	0	0	0	1	0	0	0	2	7	0	0	0	2	0	3	0	2	Unassigned
denovo8188	0	0	0	0	0	0	0	0	0	0	1	7	0	0	0	0	0	0	0	0	D_0__Bacteria	D_1__Firmicutes	D_2__Clostridia	D_3__Clostridiales	D_4__Eubacteriaceae	D_5__Pseudoramibacter
denovo8266	0	0	0	0	0	0	0	0	0	0	2	7	0	1	1	2	0	0	1	0	D_0__Bacteria	D_1__Firmicutes	D_2__Clostridia	D_3__Clostridiales	D_4__Eubacteriaceae	D_5__Pseudoramibacter	D_6__uncultured bacterium
denovo2367	136	4	0	0	70	0	0	0	77	24	12	6	75	6	0	0	105	1	2	0	D_0__Bacteria	D_1__Firmicutes	D_2__Erysipelotrichia	D_3__Erysipelotrichales	D_4__Erysipelotrichaceae	D_5__Erysipelotrichaceae UCG-004	D_6__uncultured bacterium
denovo10747	46	7	0	0	69	26	2	1	62	114	19	6	92	29	2	0	31	24	2	2	D_0__Bacteria	D_1__Firmicutes	D_2__Negativicutes	D_3__Selenomonadales	D_4__Acidaminococcaceae		D_6__uncultured bacterium
denovo13773	25	27	3	0	24	30	3	3	37	56	42	6	48	79	34	3	42	62	9	4	D_0__Bacteria	D_1__Firmicutes	D_2__Clostridia	D_3__Clostridiales	D_4__Ruminococcaceae	D_5__[Eubacterium] coprostanoligenes group	D_6__uncultured bacterium
denovo21322	20	157	139	29	8	9	10	1	8	8	6	6	10	7	4	2	12	8	1	2	D_0__Bacteria	D_1__Firmicutes	D_2__Clostridia	D_3__Clostridiales	D_4__Peptostreptococcaceae		D_6__uncultured bacterium
denovo10905	0	0	0	0	0	0	242	158	0	0	18	6	0	36	33	35	0	2	2	0	D_0__Bacteria	D_1__Firmicutes	D_2__Negativicutes	D_3__Selenomonadales	D_4__Veillonellaceae	D_5__Megasphaera
denovo11337	0	0	0	0	0	0	0	0	0	0	0	6	0	0	0	0	0	0	0	0	Unassigned						D_6__uncultured bacterium
denovo13479	0	0	0	0	0	0	0	0	0	0	2	6	0	0	0	1	0	0	0	0	D_0__Bacteria	D_1__Actinobacteria	D_2__Coriobacteriia	D_3__Coriobacteriales	D_4__Coriobacteriaceae	D_5__Olsenella	D_6__uncultured bacterium
denovo148	0	0	0	0	3	0	0	0	3	19	3	6	0	1	0	0	1	0	0	0	D_0__Bacteria	D_1__Firmicutes	D_2__Erysipelotrichia	D_3__Erysipelotrichales	D_4__Erysipelotrichaceae	D_5__Erysipelotrichaceae UCG-004	D_6__Lactobacillus plantarum
denovo15406	0	0	0	0	0	0	0	0	0	0	1	6	0	0	40	129	0	0	0	0	D_0__Bacteria	D_1__Firmicutes	D_2__Clostridia	D_3__Clostridiales	D_4__Lachnospiraceae
denovo16183	0	0	0	0	0	0	0	0	0	0	4	6	0	0	1	0	0	0	0	0	D_0__Bacteria	D_1__Firmicutes	D_2__Clostridia	D_3__Clostridiales	D_4__Lachnospiraceae	D_5__[Ruminococcus] gauvreauii group	D_6__uncultured bacterium
denovo16785	0	0	0	0	0	0	0	0	0	0	1	6	0	0	0	0	0	0	0	0	Unassigned						D_6__uncultured bacterium
denovo18203	0	0	0	0	0	0	0	1	0	0	0	6	0	0	0	1	0	0	0	0	D_0__Bacteria	D_1__Actinobacteria	D_2__Coriobacteriia	D_3__Coriobacteriales	D_4__Coriobacteriaceae	D_5__Olsenella
denovo19156	0	0	0	0	0	0	0	0	0	0	1	6	0	0	0	0	0	0	0	1	D_0__Bacteria	D_1__Firmicutes	D_2__Bacilli	D_3__Lactobacillales	D_4__Lactobacillaceae	D_5__Lactobacillus	D_6__uncultured Bacteroidaceae bacterium
denovo21935	0	0	0	0	0	0	182	116	0	1	21	6	0	29	42	37	0	1	0	0	D_0__Bacteria	D_1__Firmicutes	D_2__Bacilli	D_3__Lactobacillales	D_4__Lactobacillaceae	D_5__Lactobacillus	D_6__uncultured bacterium
denovo21955	0	0	0	0	0	0	0	0	0	0	3	6	0	0	3	9	0	0	0	0	D_0__Bacteria	D_1__Firmicutes	D_2__Negativicutes	D_3__Selenomonadales	D_4__Veillonellaceae	D_5__Mitsuokella	D_6__uncultured bacterium
denovo3570	0	0	0	0	0	0	0	0	0	0	4	6	0	0	5	18	0	0	1	0	D_0__Bacteria	D_1__Firmicutes	D_2__Negativicutes	D_3__Selenomonadales	D_4__Veillonellaceae	D_5__Mitsuokella	D_6__uncultured compost bacterium
denovo5335	0	0	0	0	0	0	0	0	0	0	1	6	0	0	0	2	0	0	0	1	D_0__Bacteria	D_1__Firmicutes	D_2__Bacilli	D_3__Lactobacillales	D_4__Lactobacillaceae	D_5__Lactobacillus	D_6__uncultured bacterium
denovo6580	0	0	0	0	0	0	0	0	0	0	0	6	0	0	0	0	0	0	0	0	D_0__Bacteria	D_1__Actinobacteria	D_2__Coriobacteriia	D_3__Coriobacteriales	D_4__Coriobacteriaceae
denovo6589	0	0	0	0	0	1	1	0	0	0	1	6	0	0	0	1	0	0	0	1	D_0__Bacteria	D_1__Firmicutes	D_2__Bacilli	D_3__Lactobacillales	D_4__Lactobacillaceae	D_5__Lactobacillus
denovo7817	0	0	0	0	0	2	0	3	1	84	17	6	0	98	1	0	2	1	2	0	D_0__Bacteria	D_1__Actinobacteria	D_2__Coriobacteriia	D_3__Coriobacteriales	D_4__Coriobacteriaceae	D_5__Slackia	D_6__uncultured rumen bacterium
denovo7857	0	0	0	0	0	0	0	0	0	0	0	6	0	0	0	0	0	0	0	1	Unassigned
denovo8495	0	0	0	0	0	0	0	0	0	0	9	6	0	1	0	0	0	0	0	0	D_0__Bacteria	D_1__Firmicutes	D_2__Bacilli	D_3__Lactobacillales	D_4__Lactobacillaceae	D_5__Lactobacillus
denovo905	0	0	0	0	0	0	0	0	0	0	0	6	0	0	0	0	0	0	0	0	D_0__Bacteria	D_1__Firmicutes	D_2__Bacilli	D_3__Lactobacillales	D_4__Lactobacillaceae	D_5__Lactobacillus	D_6__uncultured bacterium
denovo9901	0	0	0	0	0	4	1	0	0	4	9	6	0	8	1	0	0	15	0	0	D_0__Bacteria	D_1__Firmicutes	D_2__Clostridia	D_3__Clostridiales	D_4__Family XIII	D_5__Family XIII UCG-001	D_6__uncultured bacterium
denovo8213	823	182	9	0	676	53	14	1	720	37	21	5	684	33	9	1	754	19	4	1	D_0__Bacteria	D_1__Proteobacteria	D_2__Betaproteobacteria	D_3__Burkholderiales	D_4__Comamonadaceae	D_5__Acidovorax
denovo4774	126	37	0	1	145	51	15	7	104	28	10	5	127	36	2	2	152	22	7	2	D_0__Bacteria	D_1__Proteobacteria	D_2__Gammaproteobacteria	D_3__Xanthomonadales	D_4__Xanthomonadaceae	D_5__Thermomonas
denovo22478	113	29	1	1	67	12	0	0	84	10	10	5	88	1	1	0	85	7	5	2	D_0__Bacteria	D_1__Actinobacteria	D_2__Actinobacteria	D_3__Micrococcales	D_4__Intrasporangiaceae	D_5__Ornithinibacter	D_6__uncultured compost bacterium
denovo2881	81	11	0	0	143	44	9	2	76	67	14	5	98	3	0	0	91	4	2	0	D_0__Bacteria	D_1__Bacteroidetes	D_2__Bacteroidia	D_3__Bacteroidales	D_4__Rikenellaceae	D_5__Rikenellaceae RC9 gut group
denovo12409	44	26	1	0	71	42	13	1	54	114	31	5	129	5	0	0	35	3	1	0	D_0__Bacteria	D_1__Firmicutes	D_2__Clostridia	D_3__Clostridiales	D_4__Ruminococcaceae	D_5__Faecalibacterium	D_6__uncultured bacterium
denovo9932	10	6	0	0	14	1	5	2	5	4	9	5	15	0	0	0	12	3	0	0	D_0__Bacteria	D_1__Firmicutes	D_2__Clostridia	D_3__Clostridiales	D_4__Ruminococcaceae	D_5__Ruminiclostridium 5	D_6__uncultured bacterium
denovo10938	0	0	0	0	0	0	0	0	0	0	0	5	0	0	0	0	0	0	0	0	D_0__Bacteria	D_1__Firmicutes	D_2__Clostridia	D_3__Clostridiales	D_4__Family XIII	D_5__[Eubacterium] nodatum group	D_6__uncultured bacterium
denovo11015	0	0	0	0	0	0	0	0	0	0	0	5	0	0	0	0	0	0	0	0	D_0__Bacteria	D_1__Firmicutes	D_2__Clostridia	D_3__Clostridiales	D_4__Eubacteriaceae	D_5__Pseudoramibacter	D_6__uncultured bacterium
denovo11113	0	0	0	0	0	0	0	0	0	0	1	5	0	0	1	4	0	0	0	0	D_0__Bacteria	D_1__Firmicutes	D_2__Negativicutes	D_3__Selenomonadales	D_4__Veillonellaceae	D_5__Mitsuokella	D_6__uncultured organism
denovo12140	0	0	0	0	0	1	0	0	0	3	12	5	0	4	25	5	0	16	0	0	D_0__Bacteria	D_1__Firmicutes	D_2__Clostridia	D_3__Clostridiales	D_4__Lachnospiraceae	D_5__[Ruminococcus] gauvreauii group	D_6__uncultured bacterium
denovo12877	0	0	0	0	0	0	0	0	0	0	0	5	0	0	0	5	0	1	1	5	D_0__Bacteria	D_1__Firmicutes	D_2__Bacilli	D_3__Lactobacillales			D_6__uncultured bacterium
denovo13373	0	0	0	0	0	0	0	0	0	0	0	5	0	0	0	1	0	0	0	0	D_0__Bacteria	D_1__Firmicutes	D_2__Clostridia	D_3__Clostridiales	D_4__Family XIII	D_5__[Eubacterium] nodatum group
denovo13875	0	0	0	0	0	0	0	0	0	0	0	5	0	0	6	24	0	0	0	0	D_0__Bacteria	D_1__Firmicutes	D_2__Negativicutes	D_3__Selenomonadales	D_4__Veillonellaceae	D_5__Selenomonas 1
denovo14856	0	1	0	0	0	0	1	0	0	0	10	5	0	0	7	7	0	0	0	0	D_0__Bacteria	D_1__Firmicutes	D_2__Bacilli	D_3__Lactobacillales	D_4__Lactobacillaceae	D_5__Lactobacillus
denovo14861	0	0	0	0	0	0	0	0	0	0	0	5	0	0	0	0	0	0	0	0	D_0__Bacteria	D_1__Firmicutes	D_2__Clostridia	D_3__Clostridiales	D_4__Lachnospiraceae	D_5__[Ruminococcus] gauvreauii group
denovo16100	0	0	0	0	0	0	0	0	0	0	0	5	0	0	0	1	0	0	0	0	Unassigned						D_6__uncultured bacterium
denovo17282	0	0	0	0	0	0	0	0	0	0	5	5	0	0	0	0	0	0	0	0	D_0__Bacteria	D_1__Firmicutes	D_2__Bacilli	D_3__Lactobacillales	D_4__Lactobacillaceae	D_5__Lactobacillus	D_6__uncultured bacterium
denovo18016	0	0	0	0	0	0	0	2	0	0	1	5	0	0	5	20	0	1	0	0	D_0__Bacteria	D_1__Firmicutes	D_2__Negativicutes	D_3__Selenomonadales	D_4__Veillonellaceae	D_5__Megasphaera
denovo18349	0	0	0	0	0	0	0	0	0	0	0	5	0	0	0	0	0	0	0	0	D_0__Bacteria	D_1__Firmicutes	D_2__Clostridia	D_3__Clostridiales	D_4__Eubacteriaceae	D_5__Pseudoramibacter	D_6__Proteus mirabilis
denovo18684	0	0	0	0	0	0	0	0	0	0	0	5	0	0	0	1	0	0	0	0	D_0__Bacteria	D_1__Firmicutes	D_2__Clostridia	D_3__Clostridiales	D_4__Eubacteriaceae	D_5__Pseudoramibacter	D_6__uncultured bacterium
denovo19820	0	0	0	0	0	0	2	0	0	0	5	5	0	4	0	0	0	0	0	0	Unassigned
denovo20750	0	0	1	0	0	0	0	0	0	0	0	5	0	0	0	5	1	0	1	3	D_0__Bacteria	D_1__Firmicutes	D_2__Bacilli	D_3__Lactobacillales
denovo220	0	0	0	0	0	0	0	0	0	0	6	5	0	0	20	12	0	0	0	0	D_0__Bacteria	D_1__Firmicutes	D_2__Clostridia	D_3__Clostridiales	D_4__Lachnospiraceae
denovo502	0	0	0	0	0	0	0	0	0	0	0	5	0	0	2	3	0	0	0	0	D_0__Bacteria	D_1__Actinobacteria	D_2__Coriobacteriia	D_3__Coriobacteriales	D_4__Coriobacteriaceae	D_5__Olsenella
denovo5286	0	0	0	0	0	0	0	0	0	0	0	5	0	0	0	1	0	0	0	0	D_0__Bacteria	D_1__Firmicutes	D_2__Clostridia	D_3__Clostridiales	D_4__Family XIII	D_5__[Eubacterium] nodatum group
denovo6240	0	0	0	0	0	0	0	0	0	2	2	5	0	1	7	34	0	2	1	0	D_0__Bacteria	D_1__Firmicutes	D_2__Negativicutes	D_3__Selenomonadales	D_4__Veillonellaceae	D_5__Mitsuokella	D_6__uncultured bacterium
denovo6757	0	1	0	0	0	1	3	9	0	0	17	5	0	1	13	20	0	1	0	0	D_0__Bacteria	D_1__Firmicutes	D_2__Bacilli	D_3__Lactobacillales	D_4__Lactobacillaceae	D_5__Lactobacillus	D_6__uncultured bacterium
denovo6989	0	0	0	0	0	0	0	1	0	0	0	5	0	0	0	0	0	0	0	1	D_0__Bacteria	D_1__Firmicutes	D_2__Bacilli	D_3__Lactobacillales	D_4__Lactobacillaceae	D_5__Lactobacillus	D_6__uncultured bacterium
denovo8350	0	0	0	0	0	0	0	0	0	0	0	5	0	0	0	1	0	0	0	0	D_0__Bacteria	D_1__Firmicutes	D_2__Negativicutes	D_3__Selenomonadales	D_4__Veillonellaceae	D_5__Mitsuokella
denovo11568	177	20	1	0	223	13	7	1	192	11	8	4	175	7	2	1	258	8	1	3	D_0__Bacteria	D_1__Proteobacteria	D_2__Gammaproteobacteria	D_3__Xanthomonadales	D_4__Xanthomonadaceae	D_5__Aquimonas
denovo11757	54	15	0	0	105	42	10	0	54	50	12	4	96	3	0	0	63	3	0	0	D_0__Bacteria	D_1__Bacteroidetes	D_2__Bacteroidia	D_3__Bacteroidales	D_4__Prevotellaceae	D_5__Prevotellaceae UCG-004
denovo5111	51	19	1	0	29	2	1	0	51	17	4	4	29	10	0	0	23	1	0	0	D_0__Bacteria	D_1__Bacteroidetes	D_2__Bacteroidia	D_3__Bacteroidales	D_4__Prevotellaceae	D_5__Prevotellaceae UCG-004	D_6__uncultured bacterium
denovo7351	14	27	0	0	16	65	11	2	7	169	8	4	11	404	9	0	11	117	25	0	D_0__Bacteria	D_1__Firmicutes	D_2__Negativicutes	D_3__Selenomonadales	D_4__Veillonellaceae	D_5__uncultured
denovo17925	10	2	0	1	20	3	0	0	15	2	4	4	16	0	0	0	11	17	0	0	D_0__Bacteria	D_1__Firmicutes	D_2__Clostridia	D_3__Clostridiales	D_4__Ruminococcaceae	D_5__Ruminiclostridium 5	D_6__uncultured bacterium
denovo9562	7	21	0	0	7	1	0	0	8	15	10	4	6	20	2	0	11	9	0	0	D_0__Bacteria	D_1__Bacteroidetes	D_2__Bacteroidia	D_3__Bacteroidales	D_4__Prevotellaceae	D_5__Prevotella	D_6__uncultured bacterium
denovo7198	2	0	0	0	0	0	0	0	0	10	4	4	1	0	0	0	0	12	11	13	D_0__Bacteria	D_1__Actinobacteria	D_2__Coriobacteriia	D_3__Coriobacteriales	D_4__Coriobacteriaceae	D_5__uncultured
denovo10733	0	0	0	0	0	0	1	0	1	1	9	4	0	8	1	0	0	0	0	0	D_0__Bacteria	D_1__Firmicutes	D_2__Clostridia	D_3__Clostridiales	D_4__Lachnospiraceae	D_5__Stomatobaculum
denovo11152	0	0	0	0	0	0	0	0	0	27	17	4	0	1	3	0	0	2	0	0	D_0__Bacteria	D_1__Actinobacteria	D_2__Coriobacteriia	D_3__Coriobacteriales	D_4__Coriobacteriaceae	D_5__uncultured	D_6__uncultured bacterium
denovo11768	0	0	0	0	0	1	1	10	0	8	26	4	0	9	46	2	0	11	2	0	D_0__Bacteria	D_1__Firmicutes	D_2__Negativicutes	D_3__Selenomonadales	D_4__Veillonellaceae	D_5__Mitsuokella	D_6__uncultured bacterium
denovo12406	0	0	0	0	0	0	0	0	0	0	0	4	0	0	0	1	0	0	0	0	D_0__Bacteria	D_1__Firmicutes	D_2__Clostridia	D_3__Clostridiales	D_4__Eubacteriaceae	D_5__Pseudoramibacter
denovo1250	0	0	0	0	0	0	0	0	0	0	0	4	0	0	0	0	0	0	0	0	D_0__Bacteria	D_1__Firmicutes	D_2__Clostridia	D_3__Clostridiales	D_4__Eubacteriaceae	D_5__Pseudoramibacter	D_6__uncultured bacterium
denovo12804	0	0	0	0	0	0	0	0	0	0	0	4	0	0	3	6	0	0	0	1	D_0__Bacteria	D_1__Firmicutes	D_2__Erysipelotrichia	D_3__Erysipelotrichales	D_4__Erysipelotrichaceae	D_5__Erysipelotrichaceae UCG-001	D_6__uncultured bacterium
denovo133	0	0	0	0	0	0	0	0	0	0	0	4	0	0	2	3	0	0	0	0	D_0__Bacteria	D_1__Firmicutes	D_2__Clostridia	D_3__Clostridiales	D_4__Lachnospiraceae	D_5__Acetitomaculum	D_6__uncultured rumen bacterium
denovo13456	0	0	0	0	0	0	0	0	0	0	1	4	0	0	8	31	0	0	0	0	Unassigned
denovo13846	0	0	0	0	0	0	0	0	0	0	2	4	0	0	4	5	0	0	0	0	D_0__Bacteria	D_1__Firmicutes	D_2__Negativicutes	D_3__Selenomonadales	D_4__Veillonellaceae	D_5__uncultured	D_6__uncultured bacterium
denovo14093	0	0	0	0	0	0	0	0	0	0	1	4	0	0	0	3	0	0	0	0	D_0__Bacteria	D_1__Firmicutes	D_2__Bacilli	D_3__Lactobacillales	D_4__Lactobacillaceae	D_5__Lactobacillus	D_6__uncultured bacterium
denovo15379	0	0	0	0	0	0	0	0	0	0	3	4	0	0	3	0	0	0	0	0	D_0__Bacteria	D_1__Firmicutes	D_2__Clostridia	D_3__Clostridiales	D_4__Lachnospiraceae	D_5__Lachnospiraceae NK3A20 group
denovo16414	0	0	0	0	0	0	0	0	0	0	0	4	0	1	0	0	0	0	0	0	D_0__Bacteria	D_1__Firmicutes	D_2__Clostridia	D_3__Clostridiales	D_4__Lachnospiraceae	D_5__Lachnoclostridium
denovo16908	0	0	0	0	0	0	0	1	0	0	0	4	0	0	0	0	0	0	0	0	D_0__Bacteria	D_1__Firmicutes	D_2__Bacilli	D_3__Lactobacillales	D_4__Lactobacillaceae	D_5__Lactobacillus	D_6__uncultured bacterium
denovo17255	0	0	0	0	0	0	0	0	0	0	1	4	0	0	1	14	0	0	0	0	D_0__Bacteria	D_1__Firmicutes	D_2__Negativicutes	D_3__Selenomonadales	D_4__Veillonellaceae	D_5__Mitsuokella
denovo17394	0	0	0	0	0	2	0	0	0	0	8	4	0	0	1	0	0	3	0	0	D_0__Bacteria	D_1__Firmicutes	D_2__Clostridia	D_3__Clostridiales	D_4__Lachnospiraceae	D_5__Lachnospiraceae NK3A20 group
denovo17606	0	0	0	0	0	0	0	0	0	0	8	4	0	0	0	0	0	0	0	0	D_0__Bacteria	D_1__Firmicutes	D_2__Clostridia	D_3__Clostridiales	D_4__Lachnospiraceae
denovo17712	0	0	0	0	0	0	0	0	0	0	0	4	0	0	0	2	0	0	0	0	D_0__Bacteria	D_1__Firmicutes	D_2__Bacilli	D_3__Lactobacillales	D_4__Lactobacillaceae	D_5__Lactobacillus	D_6__uncultured bacterium
denovo18081	0	0	0	0	0	0	0	0	0	0	4	4	0	0	6	1	0	0	15	36	D_0__Bacteria	D_1__Firmicutes	D_2__Clostridia	D_3__Clostridiales	D_4__Lachnospiraceae	D_5__Acetitomaculum	D_6__uncultured bacterium
denovo18636	0	0	0	0	0	0	0	0	0	0	0	4	0	0	0	0	0	0	0	0	D_0__Bacteria	D_1__Firmicutes	D_2__Clostridia	D_3__Clostridiales	D_4__Ruminococcaceae	D_5__Ruminococcaceae UCG-014	D_6__uncultured bacterium
denovo18639	0	0	0	0	0	0	0	2	0	1	0	4	0	0	0	0	0	0	0	0	D_0__Bacteria	D_1__Firmicutes	D_2__Bacilli	D_3__Lactobacillales	D_4__Lactobacillaceae	D_5__Lactobacillus	D_6__uncultured bacterium
denovo19130	0	0	0	0	0	0	0	0	0	2	6	4	0	3	9	0	0	0	0	0	Unassigned
denovo19450	0	0	0	0	0	0	0	0	0	0	1	4	0	0	1	0	0	1	0	0	D_0__Bacteria	D_1__Firmicutes	D_2__Clostridia	D_3__Clostridiales	D_4__Lachnospiraceae
denovo19739	0	0	0	0	0	0	0	0	0	0	0	4	0	0	0	0	0	0	0	0	D_0__Bacteria	D_1__Firmicutes	D_2__Clostridia	D_3__Clostridiales	D_4__Lachnospiraceae	D_5__Lachnospiraceae NK3A20 group	D_6__uncultured bacterium
denovo20027	0	0	0	0	0	0	0	0	0	0	0	4	0	1	2	0	0	0	0	0	D_0__Bacteria	D_1__Firmicutes	D_2__Bacilli	D_3__Lactobacillales	D_4__Lactobacillaceae	D_5__Lactobacillus	D_6__uncultured bacterium
denovo20177	0	3	1	0	0	0	114	147	0	1	22	4	0	19	17	14	0	1	0	0	D_0__Bacteria	D_1__Firmicutes	D_2__Bacilli	D_3__Lactobacillales	D_4__Lactobacillaceae	D_5__Lactobacillus	D_6__uncultured bacterium
denovo20280	0	3	220	37	0	0	0	1	0	0	1	4	0	0	0	0	0	0	0	0	D_0__Bacteria	D_1__Firmicutes	D_2__Bacilli	D_3__Lactobacillales	D_4__Lactobacillaceae	D_5__Lactobacillus	D_6__uncultured bacterium
denovo20347	0	0	0	0	0	0	0	0	0	0	1	4	0	0	2	1	0	0	0	0	D_0__Bacteria	D_1__Firmicutes	D_2__Clostridia	D_3__Clostridiales	D_4__Lachnospiraceae	D_5__Acetitomaculum	D_6__uncultured bacterium
denovo20600	0	0	0	0	0	0	0	0	0	0	0	4	0	0	0	0	0	0	0	0	D_0__Bacteria	D_1__Firmicutes	D_2__Negativicutes	D_3__Selenomonadales	D_4__Veillonellaceae	D_5__Mitsuokella	D_6__uncultured bacterium
denovo20701	0	0	0	0	0	0	0	0	0	0	1	4	0	0	2	9	0	0	0	0	D_0__Bacteria	D_1__Firmicutes	D_2__Negativicutes	D_3__Selenomonadales	D_4__Veillonellaceae	D_5__Dialister	D_6__uncultured bacterium
denovo21051	0	0	0	0	0	0	0	0	0	0	0	4	0	0	2	2	0	0	0	0	D_0__Bacteria	D_1__Firmicutes	D_2__Negativicutes	D_3__Selenomonadales	D_4__Veillonellaceae	D_5__Mitsuokella	D_6__uncultured bacterium
denovo21073	0	0	13	8	0	0	0	0	0	0	0	4	0	0	0	0	0	0	0	0	D_0__Bacteria	D_1__Firmicutes	D_2__Bacilli	D_3__Lactobacillales	D_4__Lactobacillaceae	D_5__Lactobacillus	D_6__uncultured bacterium
denovo22249	0	0	0	0	0	0	0	0	0	0	5	4	0	1	0	0	0	0	0	0	Unassigned
denovo22272	0	0	0	0	0	0	0	0	0	0	0	4	0	0	0	0	0	0	0	0	D_0__Bacteria	D_1__Firmicutes	D_2__Clostridia	D_3__Clostridiales
denovo22370	0	0	0	0	0	0	0	0	0	0	1	4	0	0	2	0	0	0	0	0	D_0__Bacteria	D_1__Firmicutes	D_2__Clostridia	D_3__Clostridiales	D_4__Lachnospiraceae	D_5__[Ruminococcus] gauvreauii group	D_6__uncultured bacterium
denovo2239	0	0	0	0	0	0	0	0	0	0	0	4	0	0	0	0	0	0	0	0	D_0__Bacteria	D_1__Firmicutes	D_2__Bacilli	D_3__Lactobacillales	D_4__Lactobacillaceae	D_5__Lactobacillus	D_6__uncultured bacterium
denovo2250	0	0	0	0	0	0	0	0	0	0	1	4	0	0	0	0	0	0	0	0	D_0__Bacteria	D_1__Firmicutes	D_2__Clostridia	D_3__Clostridiales	D_4__Eubacteriaceae	D_5__Pseudoramibacter	D_6__uncultured bacterium
denovo3093	0	0	0	0	0	0	0	0	0	0	1	4	0	0	4	10	0	0	0	0	D_0__Bacteria	D_1__Firmicutes	D_2__Negativicutes	D_3__Selenomonadales	D_4__Veillonellaceae	D_5__Dialister
denovo3154	0	0	0	0	0	0	0	0	0	0	2	4	0	1	9	16	0	0	0	0	D_0__Bacteria	D_1__Firmicutes	D_2__Negativicutes	D_3__Selenomonadales	D_4__Veillonellaceae	D_5__Dialister	D_6__uncultured bacterium
denovo3336	0	0	0	0	0	0	4	24	0	11	17	4	1	44	108	113	0	15	1	0	D_0__Bacteria	D_1__Firmicutes	D_2__Negativicutes	D_3__Selenomonadales	D_4__Veillonellaceae	D_5__Mitsuokella	D_6__uncultured bacterium
denovo3425	0	0	0	0	0	0	0	0	0	2	1	4	0	0	34	165	0	1	0	0	D_0__Bacteria	D_1__Firmicutes	D_2__Negativicutes	D_3__Selenomonadales	D_4__Veillonellaceae	D_5__uncultured
denovo3674	0	0	0	0	0	0	0	0	0	0	0	4	0	0	0	1	0	0	0	0	D_0__Bacteria	D_1__Firmicutes	D_2__Clostridia	D_3__Clostridiales	D_4__Lachnospiraceae	D_5__Coprococcus 1
denovo4336	0	0	0	0	0	0	0	0	0	0	0	4	0	0	0	0	0	0	0	0	D_0__Bacteria	D_1__Firmicutes	D_2__Clostridia	D_3__Clostridiales	D_4__Lachnospiraceae	D_5__[Ruminococcus] gauvreauii group	D_6__uncultured bacterium
denovo4421	0	0	0	0	0	0	0	0	0	0	0	4	0	0	0	0	0	0	0	0	Unassigned						D_6__uncultured bacterium
denovo458	0	0	0	0	0	1	5	26	0	0	9	4	0	8	21	15	0	1	0	0	D_0__Bacteria	D_1__Firmicutes	D_2__Bacilli	D_3__Lactobacillales	D_4__Lactobacillaceae	D_5__Lactobacillus	D_6__uncultured bacterium
denovo4673	0	0	0	0	0	0	0	0	0	0	0	4	0	0	0	0	0	0	0	1	D_0__Bacteria	D_1__Firmicutes	D_2__Bacilli	D_3__Lactobacillales	D_4__Lactobacillaceae	D_5__Lactobacillus
denovo512	0	0	0	0	0	0	0	0	0	0	3	4	0	0	3	0	0	0	0	0	D_0__Bacteria	D_1__Firmicutes	D_2__Clostridia	D_3__Clostridiales	D_4__Lachnospiraceae	D_5__Syntrophococcus
denovo5791	0	0	0	0	0	0	2	0	0	0	4	4	0	1	26	56	0	0	3	3	D_0__Bacteria	D_1__Firmicutes	D_2__Negativicutes	D_3__Selenomonadales	D_4__Veillonellaceae	D_5__Megasphaera
denovo5923	0	0	0	0	0	0	0	0	0	0	3	4	0	0	1	3	0	2	0	2	D_0__Bacteria	D_1__Firmicutes	D_2__Bacilli	D_3__Lactobacillales	D_4__Lactobacillaceae	D_5__Lactobacillus
denovo6339	0	0	0	0	0	0	0	0	0	0	0	4	0	0	0	0	0	0	0	0	D_0__Bacteria	D_1__Firmicutes	D_2__Bacilli	D_3__Lactobacillales	D_4__Lactobacillaceae	D_5__Lactobacillus
denovo6857	0	0	0	0	0	0	0	0	0	0	4	4	0	0	0	0	0	1	0	0	D_0__Bacteria	D_1__Firmicutes	D_2__Clostridia	D_3__Clostridiales	D_4__Ruminococcaceae	D_5__Ruminococcaceae NK4A214 group	D_6__uncultured bacterium
denovo7695	0	0	0	0	0	0	0	0	0	0	2	4	0	0	0	0	0	0	0	0	D_0__Bacteria	D_1__Firmicutes	D_2__Clostridia	D_3__Clostridiales	D_4__Lachnospiraceae	D_5__Lachnospiraceae NK3A20 group	D_6__uncultured Cytophagales bacterium
denovo8388	0	0	0	0	0	0	0	0	0	0	0	4	0	0	0	0	0	0	0	0	Unassigned						D_6__uncultured bacterium
denovo945	0	0	0	0	0	0	0	0	0	0	0	4	0	0	1	0	0	0	0	0	D_0__Bacteria	D_1__Firmicutes	D_2__Clostridia	D_3__Clostridiales	D_4__Lachnospiraceae	D_5__Lachnospiraceae NK3A20 group
denovo9612	0	0	0	0	0	0	0	0	0	0	0	4	0	0	0	0	0	0	0	0	D_0__Bacteria	D_1__Firmicutes	D_2__Clostridia	D_3__Clostridiales	D_4__Eubacteriaceae	D_5__Pseudoramibacter
denovo18023	333	62	3	0	519	74	6	1	632	151	37	3	508	21	1	0	396	8	3	1	D_0__Bacteria	D_1__Bacteroidetes	D_2__Bacteroidia	D_3__Bacteroidales	D_4__Rikenellaceae	D_5__U29-B03	D_6__uncultured bacterium
denovo14725	310	15	2	2	146	4	1	0	195	6	3	3	137	2	0	0	317	2	1	0	D_0__Bacteria	D_1__Proteobacteria	D_2__Betaproteobacteria	D_3__Burkholderiales	D_4__Comamonadaceae	D_5__Hydrogenophaga
denovo2959	63	186	10	0	352	175	73	17	48	55	23	3	186	213	3	0	94	23	0	0	D_0__Bacteria	D_1__Bacteroidetes	D_2__Bacteroidia	D_3__Bacteroidales	D_4__Bacteroidales S24-7 group	D_5__uncultured bacterium	D_6__uncultured organism
denovo21863	36	4	0	1	24	11	0	1	56	18	6	3	72	0	0	0	51	5	5	2	D_0__Bacteria	D_1__Firmicutes	D_2__Clostridia	D_3__Clostridiales	D_4__Ruminococcaceae	D_5__Ruminiclostridium	D_6__uncultured bacterium
denovo14934	33	19	1	0	99	42	5	1	57	43	4	3	94	19	0	0	76	20	9	2	D_0__Bacteria	D_1__Firmicutes	D_2__Negativicutes	D_3__Selenomonadales	D_4__Veillonellaceae	D_5__Megasphaera
denovo10534	29	10	0	0	56	80	6	0	53	215	12	3	53	2	0	0	72	0	0	0	D_0__Bacteria	D_1__Bacteroidetes	D_2__Bacteroidia	D_3__Bacteroidales	D_4__Prevotellaceae
denovo9629	9	3	0	0	8	0	0	0	21	14	3	3	10	4	0	0	11	2	1	1	D_0__Bacteria	D_1__Firmicutes	D_2__Erysipelotrichia	D_3__Erysipelotrichales	D_4__Erysipelotrichaceae	D_5__Erysipelotrichaceae UCG-004
denovo11854	6	66	66	5	8	3	4	1	8	1	0	3	8	1	0	0	2	16	4	0	D_0__Bacteria	D_1__Firmicutes	D_2__Clostridia	D_3__Clostridiales	D_4__Clostridiaceae 1	D_5__Clostridium sensu stricto 1	D_6__uncultured bacterium
denovo11650	4	2	9	5	2	0	1	0	0	0	2	3	0	0	0	0	2	0	0	0	D_0__Bacteria	D_1__Thermotogae	D_2__Thermotogae	D_3__Thermotogales	D_4__Thermotogaceae	D_5__Defluviitoga
denovo11523	3	1	0	0	2	0	1	1	8	19	5	3	8	0	0	0	7	0	0	0	D_0__Bacteria	D_1__Bacteroidetes	D_2__Bacteroidia	D_3__Bacteroidales	D_4__Bacteroidales S24-7 group	D_5__uncultured bacterium
denovo16441	3	4	2	3	5	3	1	0	0	5	2	3	0	0	0	0	0	0	0	0	D_0__Bacteria	D_1__Elusimicrobia	D_2__Elusimicrobia	D_3__Lineage I (Endomicrobia)	D_4__uncultured Termite group 1 bacterium	D_5__uncultured Termite group 1 bacterium
denovo11211	2	2	0	0	7	7	0	0	16	40	14	3	21	36	0	0	3	0	0	0	D_0__Bacteria	D_1__Bacteroidetes	D_2__Bacteroidia	D_3__Bacteroidales	D_4__Rikenellaceae	D_5__Rikenellaceae RC9 gut group
denovo20370	2	1	0	0	0	0	0	0	1	1	0	3	0	0	0	0	3	0	0	0	D_0__Bacteria	D_1__Bacteroidetes	D_2__Bacteroidia	D_3__Bacteroidales	D_4__Prevotellaceae	D_5__Prevotellaceae UCG-004
denovo6142	2	0	0	0	1	3	0	0	0	6	13	3	0	0	0	0	1	1	0	0	D_0__Bacteria	D_1__Firmicutes	D_2__Erysipelotrichia	D_3__Erysipelotrichales	D_4__Erysipelotrichaceae	D_5__Erysipelotrichaceae UCG-006
denovo18655	1	0	0	0	0	0	0	0	1	13	38	3	0	0	3	0	0	3	0	0	D_0__Bacteria	D_1__Actinobacteria	D_2__Coriobacteriia	D_3__Coriobacteriales	D_4__Coriobacteriaceae	D_5__uncultured	D_6__uncultured bacterium
denovo9198	1	1	0	0	0	0	0	0	0	0	1	3	0	0	1	0	0	0	0	0	D_0__Bacteria	D_1__Actinobacteria	D_2__Coriobacteriia	D_3__Coriobacteriales	D_4__Coriobacteriaceae	D_5__Olsenella
denovo10229	0	0	0	0	0	0	1	0	0	0	3	3	0	0	4	5	0	0	0	0	D_0__Bacteria	D_1__Firmicutes
denovo10394	0	0	0	0	0	0	0	0	0	0	0	3	0	0	2	5	0	0	0	0	D_0__Bacteria	D_1__Firmicutes	D_2__Bacilli	D_3__Lactobacillales	D_4__Lactobacillaceae	D_5__Lactobacillus
denovo10574	0	2	2	2	0	0	0	0	0	2	1	3	1	1	0	0	2	2	0	0	D_0__Bacteria	D_1__Actinobacteria	D_2__Actinobacteria	D_3__Corynebacteriales	D_4__Corynebacteriaceae	D_5__Corynebacterium 1
denovo10831	0	0	0	0	0	0	0	0	0	1	7	3	0	11	48	39	0	1	1	0	D_0__Bacteria	D_1__Firmicutes	D_2__Negativicutes	D_3__Selenomonadales	D_4__Veillonellaceae	D_5__Mitsuokella	D_6__uncultured bacterium
denovo10922	0	0	0	1	0	0	4	61	0	9	23	3	0	29	104	38	0	25	2	0	D_0__Bacteria	D_1__Firmicutes	D_2__Negativicutes	D_3__Selenomonadales	D_4__Veillonellaceae
denovo11017	0	0	2	16	0	0	0	0	0	0	0	3	0	0	0	0	0	0	0	0	D_0__Bacteria	D_1__Firmicutes	D_2__Bacilli	D_3__Lactobacillales	D_4__Lactobacillaceae	D_5__Lactobacillus	D_6__uncultured bacterium
denovo11362	0	0	0	0	0	0	0	0	0	0	0	3	0	0	0	0	0	0	0	0	Unassigned
denovo11483	0	0	0	0	0	0	0	0	0	2	10	3	0	7	20	8	0	3	0	0	D_0__Bacteria	D_1__Firmicutes	D_2__Negativicutes	D_3__Selenomonadales	D_4__Veillonellaceae	D_5__Mitsuokella	D_6__uncultured bacterium
denovo11889	0	0	0	0	0	0	0	0	0	2	6	3	0	0	0	0	0	0	0	0	D_0__Bacteria	D_1__Firmicutes	D_2__Clostridia	D_3__Clostridiales	D_4__Lachnospiraceae	D_5__[Ruminococcus] gauvreauii group	D_6__uncultured bacterium
denovo12347	0	0	0	0	0	0	0	0	0	0	2	3	0	0	1	0	0	0	0	0	D_0__Bacteria	D_1__Firmicutes	D_2__Clostridia	D_3__Clostridiales	D_4__Family XIII	D_5__[Eubacterium] nodatum group
denovo12391	0	0	0	0	0	0	0	2	0	0	0	3	0	0	0	0	0	0	0	0	Unassigned						D_6__uncultured bacterium
denovo1242	0	4	0	0	0	2	9	4	0	0	14	3	0	5	13	4	0	3	7	2	D_0__Bacteria	D_1__Firmicutes	D_2__Negativicutes	D_3__Selenomonadales	D_4__Veillonellaceae	D_5__Allisonella
denovo12595	0	0	0	0	0	0	0	0	0	1	0	3	0	0	0	0	0	0	0	0	D_0__Bacteria	D_1__Actinobacteria	D_2__Coriobacteriia	D_3__Coriobacteriales	D_4__Coriobacteriaceae	D_5__Olsenella	D_6__uncultured bacterium
denovo12928	0	0	0	0	0	0	0	0	0	2	3	3	0	7	13	13	0	3	1	1	D_0__Bacteria	D_1__Firmicutes	D_2__Negativicutes	D_3__Selenomonadales	D_4__Veillonellaceae	D_5__Mitsuokella	D_6__uncultured bacterium
denovo13220	0	0	0	0	0	0	0	0	0	0	0	3	0	0	0	2	0	0	0	0	D_0__Bacteria	D_1__Actinobacteria	D_2__Coriobacteriia	D_3__Coriobacteriales	D_4__Coriobacteriaceae	D_5__Olsenella	D_6__uncultured bacterium
denovo13683	0	0	0	0	0	0	0	0	0	0	0	3	0	0	0	0	0	0	0	0	D_0__Bacteria	D_1__Actinobacteria	D_2__Coriobacteriia	D_3__Coriobacteriales	D_4__Coriobacteriaceae	D_5__Olsenella
denovo13697	0	0	0	0	0	1	1	0	0	0	3	3	0	1	0	0	0	0	0	0	D_0__Bacteria	D_1__Firmicutes	D_2__Clostridia	D_3__Clostridiales	D_4__Lachnospiraceae	D_5__Butyrivibrio 2
denovo13978	0	3	0	0	0	0	0	0	0	0	0	3	0	0	0	0	0	0	0	0	D_0__Bacteria	D_1__Firmicutes	D_2__Bacilli	D_3__Lactobacillales	D_4__Lactobacillaceae	D_5__Lactobacillus	D_6__uncultured bacterium
denovo141	0	0	0	0	0	0	0	0	0	0	0	3	0	0	0	0	0	0	0	0	D_0__Bacteria	D_1__Actinobacteria	D_2__Coriobacteriia	D_3__Coriobacteriales	D_4__Coriobacteriaceae	D_5__uncultured	D_6__uncultured bacterium
denovo14297	0	0	0	0	0	0	0	0	0	0	0	3	0	0	0	0	0	0	0	0	D_0__Bacteria	D_1__Actinobacteria	D_2__Coriobacteriia	D_3__Coriobacteriales	D_4__Coriobacteriaceae	D_5__Atopobium	D_6__uncultured bacterium
denovo14701	0	0	0	0	0	0	3	0	0	0	6	3	0	1	5	0	0	0	0	0	D_0__Bacteria	D_1__Firmicutes	D_2__Clostridia	D_3__Clostridiales	D_4__Lachnospiraceae	D_5__[Ruminococcus] gauvreauii group	D_6__uncultured bacterium
denovo14862	0	0	0	0	0	0	0	0	0	0	1	3	0	0	0	4	0	0	0	0	Unassigned
denovo15160	0	0	0	0	0	0	0	0	0	0	0	3	0	0	0	1	0	0	0	0	Unassigned
denovo15231	0	0	0	0	0	0	0	0	0	0	0	3	0	0	0	0	0	0	0	0	Unassigned
denovo15596	0	0	0	0	0	1	0	0	0	0	0	3	0	0	0	0	0	0	0	0	Unassigned
denovo15729	0	0	0	0	0	0	3	0	0	0	6	3	0	1	0	0	0	0	0	0	Unassigned						D_6__uncultured bacterium
denovo15896	0	1	0	0	0	1	3	0	0	0	2	3	0	3	1	2	0	0	0	0	D_0__Bacteria	D_1__Firmicutes	D_2__Clostridia	D_3__Clostridiales	D_4__Lachnospiraceae	D_5__[Ruminococcus] gauvreauii group
denovo15953	0	0	0	0	0	0	0	0	0	0	0	3	0	0	1	0	0	2	0	0	D_0__Bacteria	D_1__Firmicutes	D_2__Erysipelotrichia	D_3__Erysipelotrichales	D_4__Erysipelotrichaceae	D_5__Erysipelotrichaceae UCG-006
denovo16384	0	0	0	0	0	0	0	0	0	0	0	3	0	0	0	0	0	0	0	0	D_0__Bacteria	D_1__Firmicutes	D_2__Clostridia	D_3__Clostridiales	D_4__Eubacteriaceae	D_5__Pseudoramibacter	D_6__uncultured bacterium
denovo16780	0	0	0	0	0	0	0	0	0	0	0	3	0	0	0	0	0	0	0	0	D_0__Bacteria	D_1__Firmicutes	D_2__Clostridia	D_3__Clostridiales	D_4__Lachnospiraceae	D_5__Lachnospiraceae NK3A20 group	D_6__uncultured bacterium
denovo16919	0	1	0	0	0	0	0	1	0	0	5	3	0	5	11	17	0	0	0	0	D_0__Bacteria	D_1__Firmicutes	D_2__Negativicutes	D_3__Selenomonadales	D_4__Veillonellaceae	D_5__Dialister	D_6__uncultured rumen bacterium
denovo17218	0	0	0	0	0	0	3	123	0	188	67	3	0	147	33	4	0	5	11	0	D_0__Bacteria	D_1__Firmicutes	D_2__Negativicutes	D_3__Selenomonadales	D_4__Veillonellaceae	D_5__Megasphaera	D_6__uncultured bacterium
denovo17444	0	0	0	0	0	0	0	0	0	1	1	3	0	0	10	10	0	0	0	0	D_0__Bacteria	D_1__Firmicutes	D_2__Negativicutes	D_3__Selenomonadales	D_4__Veillonellaceae	D_5__Mitsuokella	D_6__uncultured Saprospiraceae bacterium
denovo17752	0	0	0	0	0	0	0	0	0	0	3	3	1	8	1	0	0	0	0	0	D_0__Bacteria	D_1__Firmicutes	D_2__Clostridia	D_3__Clostridiales	D_4__Lachnospiraceae	D_5__Lachnospiraceae NK3A20 group	D_6__uncultured bacterium
denovo18451	0	0	0	0	0	0	0	0	0	0	0	3	0	0	0	0	0	0	0	0	D_0__Bacteria	D_1__Firmicutes	D_2__Clostridia	D_3__Clostridiales	D_4__Lachnospiraceae	D_5__Roseburia
denovo19107	0	2	0	0	0	1	0	0	0	2	7	3	0	4	0	0	0	0	0	1	D_0__Bacteria	D_1__Firmicutes	D_2__Clostridia	D_3__Clostridiales	D_4__Lachnospiraceae	D_5__Lachnospiraceae UCG-004	D_6__uncultured bacterium
denovo19765	0	0	0	0	0	0	0	0	0	0	1	3	0	0	1	1	0	1	0	0	D_0__Bacteria	D_1__Firmicutes	D_2__Clostridia	D_3__Clostridiales	D_4__Lachnospiraceae	D_5__[Ruminococcus] gauvreauii group
denovo20153	0	0	0	0	0	0	0	0	0	0	13	3	0	4	87	70	0	2	8	0	D_0__Bacteria	D_1__Firmicutes	D_2__Negativicutes	D_3__Selenomonadales	D_4__Acidaminococcaceae	D_5__Acidaminococcus
denovo20993	0	1	0	0	0	0	2	0	0	0	8	3	0	1	2	0	0	0	0	0	D_0__Bacteria	D_1__Firmicutes	D_2__Clostridia	D_3__Clostridiales	D_4__Lachnospiraceae	D_5__Blautia
denovo21482	0	0	0	0	0	0	1	2	0	27	43	3	0	16	1	0	0	8	113	10	D_0__Bacteria	D_1__Firmicutes	D_2__Negativicutes	D_3__Selenomonadales	D_4__Veillonellaceae	D_5__Megasphaera
denovo21573	0	0	0	0	0	0	0	0	0	1	8	3	0	0	3	0	0	0	0	0	D_0__Bacteria	D_1__Firmicutes	D_2__Clostridia	D_3__Clostridiales	D_4__Lachnospiraceae	D_5__Lachnospiraceae NK3A20 group
denovo22322	0	0	0	0	0	0	0	0	0	0	0	3	0	0	0	0	0	0	0	0	D_0__Bacteria	D_1__Firmicutes	D_2__Clostridia	D_3__Clostridiales	D_4__Christensenellaceae	D_5__Christensenellaceae R-7 group
denovo2612	0	0	0	0	0	0	0	0	0	0	7	3	0	0	0	0	0	0	0	0	D_0__Bacteria	D_1__Firmicutes	D_2__Clostridia	D_3__Clostridiales	D_4__Lachnospiraceae	D_5__Lachnospiraceae NK3A20 group
denovo2669	0	0	0	0	0	0	1	1	0	0	1	3	0	0	1	0	0	0	0	0	Unassigned						D_6__uncultured bacterium
denovo3489	0	0	0	0	0	1	1	0	0	0	2	3	0	3	0	1	0	0	0	0	D_0__Bacteria	D_1__Firmicutes	D_2__Bacilli	D_3__Lactobacillales	D_4__Lactobacillaceae	D_5__Lactobacillus
denovo3501	0	0	0	0	0	0	0	0	0	0	0	3	0	0	0	0	0	0	0	0	Unassigned
denovo3659	0	0	0	0	0	0	0	0	0	0	0	3	0	0	3	1	0	0	0	0	D_0__Bacteria	D_1__Firmicutes	D_2__Clostridia	D_3__Clostridiales	D_4__Lachnospiraceae	D_5__Acetitomaculum	D_6__uncultured bacterium
denovo3702	0	0	0	0	0	0	0	0	0	0	0	3	0	0	0	0	0	0	0	0	D_0__Bacteria	D_1__Firmicutes	D_2__Bacilli	D_3__Lactobacillales	D_4__Lactobacillaceae	D_5__Lactobacillus
denovo3767	0	0	0	0	0	0	0	0	0	0	0	3	0	0	0	1	0	0	0	0	D_0__Bacteria	D_1__Firmicutes	D_2__Bacilli	D_3__Lactobacillales	D_4__Lactobacillaceae	D_5__Lactobacillus
denovo4283	0	0	0	0	0	0	0	0	0	0	1	3	0	0	0	0	0	0	0	0	D_0__Bacteria	D_1__Firmicutes	D_2__Clostridia	D_3__Clostridiales	D_4__Lachnospiraceae	D_5__[Ruminococcus] gauvreauii group
denovo4293	0	0	0	0	0	0	0	0	0	0	0	3	0	0	1	1	0	0	0	0	D_0__Bacteria	D_1__Firmicutes	D_2__Bacilli	D_3__Lactobacillales	D_4__Lactobacillaceae	D_5__Lactobacillus	D_6__uncultured bacterium
denovo437	0	0	0	0	0	0	0	0	0	0	0	3	0	0	0	1	0	0	0	0	D_0__Bacteria	D_1__Firmicutes	D_2__Clostridia	D_3__Clostridiales	D_4__Eubacteriaceae	D_5__Pseudoramibacter	D_6__uncultured bacterium
denovo4686	0	0	0	0	0	0	0	2	0	1	2	3	0	13	8	1	0	0	1	0	D_0__Bacteria	D_1__Firmicutes	D_2__Negativicutes	D_3__Selenomonadales	D_4__Veillonellaceae	D_5__Megasphaera	D_6__uncultured bacterium
denovo6310	0	13	0	0	0	2	4	0	0	0	5	3	1	5	2	0	0	0	0	0	D_0__Bacteria	D_1__Firmicutes	D_2__Bacilli	D_3__Lactobacillales	D_4__Lactobacillaceae	D_5__Lactobacillus	D_6__uncultured bacterium
denovo6467	0	0	0	0	0	0	0	0	0	0	3	3	0	0	2	6	0	0	0	0	D_0__Bacteria	D_1__Firmicutes	D_2__Bacilli	D_3__Lactobacillales	D_4__Lactobacillaceae	D_5__Lactobacillus	D_6__uncultured bacterium
denovo6681	0	0	0	0	0	0	0	0	0	0	3	3	0	0	6	6	0	0	0	0	D_0__Bacteria	D_1__Firmicutes	D_2__Erysipelotrichia	D_3__Erysipelotrichales	D_4__Erysipelotrichaceae	D_5__Solobacterium
denovo7083	0	0	0	0	0	0	0	0	0	0	5	3	0	1	2	0	0	0	0	0	D_0__Bacteria	D_1__Firmicutes					D_6__uncultured bacterium
denovo7250	0	0	0	0	0	0	0	0	0	0	0	3	0	0	3	0	0	0	0	0	D_0__Bacteria	D_1__Firmicutes	D_2__Negativicutes	D_3__Selenomonadales	D_4__Veillonellaceae	D_5__Mitsuokella
denovo7278	0	0	0	0	1	0	0	0	8	21	12	3	1	0	0	0	2	0	0	0	D_0__Bacteria	D_1__Firmicutes	D_2__Clostridia	D_3__Clostridiales	D_4__Ruminococcaceae	D_5__Ruminococcaceae UCG-014
denovo7750	0	0	0	0	0	0	0	0	0	0	0	3	0	0	0	0	0	0	0	0	D_0__Bacteria	D_1__Actinobacteria	D_2__Coriobacteriia	D_3__Coriobacteriales	D_4__Coriobacteriaceae	D_5__uncultured
denovo8942	0	0	0	0	0	0	3	1	0	0	1	3	0	2	1	0	0	0	0	0	D_0__Bacteria	D_1__Firmicutes	D_2__Negativicutes	D_3__Selenomonadales	D_4__Acidaminococcaceae	D_5__Acidaminococcus
denovo9434	0	0	0	0	0	0	0	16	0	6	7	3	0	13	4	0	0	0	0	0	D_0__Bacteria	D_1__Firmicutes	D_2__Negativicutes	D_3__Selenomonadales	D_4__Veillonellaceae	D_5__Megasphaera
denovo9567	0	0	0	1	0	0	0	0	0	0	0	3	0	0	0	1	0	0	0	0	D_0__Bacteria	D_1__Firmicutes	D_2__Bacilli	D_3__Lactobacillales	D_4__Lactobacillaceae	D_5__Lactobacillus	D_6__uncultured bacterium
denovo9904	0	0	0	0	0	0	0	0	0	0	1	3	0	1	10	31	0	0	4	1	D_0__Bacteria	D_1__Firmicutes	D_2__Negativicutes	D_3__Selenomonadales	D_4__Veillonellaceae	D_5__Dialister	D_6__uncultured bacterium
denovo11971	416	196	6	1	717	23	5	1	454	181	47	2	760	6	0	0	625	40	3	2	D_0__Bacteria	D_1__Firmicutes	D_2__Clostridia	D_3__Clostridiales	D_4__Clostridiaceae 1	D_5__Caloramator
denovo2080	298	123	5	0	392	126	23	4	270	359	5	2	349	5	0	0	269	0	0	0	D_0__Bacteria	D_1__Bacteroidetes	D_2__Bacteroidia	D_3__Bacteroidales	D_4__uncultured	D_5__uncultured bacterium
denovo10506	197	5	1	0	502	7	5	2	240	27	23	2	215	1	0	0	224	8	1	0	D_0__Bacteria	D_1__Firmicutes	D_2__Clostridia	D_3__Clostridiales	D_4__Ruminococcaceae	D_5__Ruminococcaceae NK4A214 group	D_6__uncultured bacterium
denovo252	171	25	0	0	248	0	0	0	188	2	1	2	241	0	0	0	242	0	0	1	D_0__Bacteria	D_1__Proteobacteria	D_2__Alphaproteobacteria	D_3__Caulobacterales	D_4__Hyphomonadaceae	D_5__Hirschia	D_6__uncultured bacterium
denovo7285	152	6	1	2	175	98	12	2	141	18	5	2	207	18	5	0	199	42	1	4	D_0__Bacteria	D_1__Actinobacteria	D_2__Acidimicrobiia	D_3__Acidimicrobiales	D_4__Acidimicrobiales Incertae Sedis	D_5__Candidatus Microthrix	D_6__uncultured bacterium
denovo4981	75	857	39	0	145	176	62	5	57	22	11	2	63	76	130	0	72	3	0	1	D_0__Bacteria	D_1__Bacteroidetes	D_2__Bacteroidia	D_3__Bacteroidales	D_4__Prevotellaceae	D_5__Prevotella 7
denovo258	55	26	1	0	87	11	4	1	91	3	0	2	105	8	2	0	103	7	0	2	D_0__Bacteria	D_1__Proteobacteria	D_2__Betaproteobacteria	D_3__Burkholderiales	D_4__Comamonadaceae	D_5__uncultured	D_6__uncultured bacterium
denovo12309	53	3	0	0	51	11	0	0	42	34	1	2	55	3	0	0	43	19	6	1	D_0__Bacteria	D_1__Firmicutes	D_2__Negativicutes	D_3__Selenomonadales	D_4__Acidaminococcaceae	D_5__Succiniclasticum
denovo18498	43	361	3	0	30	88	20	3	32	153	8	2	59	94	1	0	37	9	0	0	D_0__Bacteria	D_1__Bacteroidetes	D_2__Bacteroidia	D_3__Bacteroidales	D_4__Prevotellaceae	D_5__Prevotella 7	D_6__uncultured bacterium
denovo10028	25	7	0	0	17	1	2	0	15	1	0	2	15	1	1	0	27	1	0	0	D_0__Bacteria	D_1__Proteobacteria	D_2__Betaproteobacteria	D_3__Burkholderiales	D_4__Comamonadaceae		D_6__uncultured bacterium
denovo19405	25	1	1	1	40	2	2	0	29	0	1	2	28	0	0	0	34	0	0	0	D_0__Bacteria	D_1__Proteobacteria	D_2__Betaproteobacteria	D_3__Burkholderiales	D_4__Alcaligenaceae	D_5__uncultured	D_6__uncultured bacterium
denovo19482	24	18	12	1	32	0	0	1	21	3	1	2	17	6	9	9	36	3553	4612	4239	D_0__Bacteria	D_1__Bacteroidetes	D_2__Bacteroidia	D_3__Bacteroidales	D_4__Bacteroidaceae	D_5__Bacteroides	D_6__uncultured bacterium
denovo16073	19	1	0	0	22	1	0	0	33	2	2	2	31	0	1	0	36	0	0	0	D_0__Bacteria	D_1__Firmicutes	D_2__Clostridia	D_3__Clostridiales	D_4__Ruminococcaceae	D_5__[Eubacterium] coprostanoligenes group	D_6__uncultured bacterium
denovo8961	19	10	1	0	9	5	1	0	19	16	20	2	27	1	0	0	8	2	1	0	D_0__Bacteria	D_1__Bacteroidetes	D_2__Bacteroidia	D_3__Bacteroidales	D_4__Bacteroidales S24-7 group	D_5__uncultured bacterium	D_6__uncultured bacterium
denovo6755	13	1	0	0	16	6	0	0	11	22	5	2	23	1	0	0	19	2	0	0	D_0__Bacteria	D_1__Firmicutes	D_2__Negativicutes	D_3__Selenomonadales	D_4__Acidaminococcaceae	D_5__Acidaminococcus
denovo13996	12	6	0	0	28	16	5	0	10	32	5	2	19	2	0	0	22	1	0	0	Unassigned						D_6__uncultured bacterium
denovo21802	9	3	0	0	8	5	1	0	9	2	0	2	13	0	0	0	12	0	0	0	D_0__Bacteria	D_1__Firmicutes	D_2__Clostridia	D_3__Clostridiales	D_4__Ruminococcaceae	D_5__Ruminococcaceae UCG-010	D_6__uncultured bacterium
denovo10216	8	14	9	15	0	3	2	3	3	1	1	2	2	2	0	0	3	3	0	0	D_0__Bacteria	D_1__Bacteroidetes	D_2__Flavobacteriia	D_3__Flavobacteriales	D_4__Flavobacteriaceae	D_5__Moheibacter
denovo2026	8	10	0	0	5	0	0	0	15	22	8	2	10	0	0	0	9	1	0	0	D_0__Bacteria	D_1__Bacteroidetes	D_2__Bacteroidia	D_3__Bacteroidales	D_4__Bacteroidales S24-7 group	D_5__uncultured bacterium
denovo13898	7	0	0	0	2	0	0	0	1	1	0	2	4	0	0	0	0	0	0	0	Unassigned						D_6__uncultured bacterium
denovo7180	5	0	0	0	3	1	0	0	5	5	0	2	6	0	0	0	3	0	0	0	D_0__Bacteria	D_1__Firmicutes	D_2__Negativicutes	D_3__Selenomonadales	D_4__Acidaminococcaceae	D_5__Succiniclasticum	D_6__uncultured bacterium
denovo1702	4	0	0	0	8	3	0	0	2	4	0	2	4	0	0	0	7	0	0	0	D_0__Bacteria	D_1__Bacteroidetes	D_2__Bacteroidia	D_3__Bacteroidales	D_4__Prevotellaceae	D_5__Prevotellaceae UCG-004	D_6__uncultured bacterium
denovo10354	2	11	0	0	6	0	2	1	2	3	8	2	10	0	0	0	8	5	2	2	D_0__Bacteria	D_1__Firmicutes	D_2__Clostridia	D_3__Clostridiales	D_4__Ruminococcaceae	D_5__Anaerofilum
denovo14885	2	3	0	0	4	2	0	0	2	208	31	2	3	20	0	0	3	5	0	0	D_0__Bacteria	D_1__Firmicutes	D_2__Clostridia	D_3__Clostridiales	D_4__Lachnospiraceae	D_5__Oribacterium
denovo22400	2	0	0	0	1	3	0	0	3	3	1	2	2	3	3	0	1	3	15	4	D_0__Bacteria	D_1__Firmicutes	D_2__Clostridia	D_3__Clostridiales	D_4__Peptococcaceae	D_5__Peptococcus	D_6__uncultured bacterium
denovo3927	2	0	0	0	1	0	1	0	3	0	0	2	3	2	0	0	1	0	0	0	D_0__Bacteria	D_1__Firmicutes	D_2__Clostridia	D_3__Clostridiales	D_4__Lachnospiraceae	D_5__Lachnospiraceae NK3A20 group	D_6__uncultured bacterium
denovo5083	2	0	0	0	0	0	0	0	0	1	8	2	0	0	0	0	0	5	3	0	D_0__Bacteria	D_1__Actinobacteria	D_2__Coriobacteriia	D_3__Coriobacteriales	D_4__Coriobacteriaceae	D_5__Slackia	D_6__uncultured bacterium
denovo5554	2	0	0	0	2	4	2	0	1	4	2	2	3	0	1	0	1	1	0	0	D_0__Bacteria	D_1__Firmicutes	D_2__Clostridia	D_3__Clostridiales	D_4__Ruminococcaceae	D_5__uncultured
denovo13743	1	15	19	1	0	2	0	0	0	1	1	2	0	0	0	1	6	1	1	1	D_0__Bacteria	D_1__Firmicutes	D_2__Erysipelotrichia	D_3__Erysipelotrichales	D_4__Erysipelotrichaceae	D_5__Turicibacter	D_6__uncultured bacterium
denovo13949	1	0	0	2	0	0	0	0	0	0	0	2	0	0	0	0	0	0	0	0	D_0__Bacteria	D_1__Bacteroidetes	D_2__Flavobacteriia	D_3__Flavobacteriales	D_4__Cryomorphaceae	D_5__Brumimicrobium
denovo18216	1	0	0	0	0	0	1	0	0	0	3	2	0	0	0	0	0	0	0	0	Unassigned
denovo10049	0	0	0	0	0	0	0	0	0	0	0	2	0	0	4	3	0	0	0	0	D_0__Bacteria	D_1__Firmicutes	D_2__Negativicutes	D_3__Selenomonadales	D_4__Veillonellaceae
denovo10188	0	0	0	0	0	0	0	0	0	0	0	2	0	0	2	2	0	0	0	0	D_0__Bacteria	D_1__Firmicutes	D_2__Bacilli	D_3__Lactobacillales	D_4__Lactobacillaceae	D_5__Lactobacillus	D_6__uncultured bacterium
denovo10291	0	45	0	0	0	2	7	1	0	0	4	2	0	3	1	0	0	0	0	0	Unassigned						D_6__uncultured organism
denovo10421	0	0	0	0	0	0	0	0	0	0	1	2	0	0	0	1	0	0	0	0	D_0__Bacteria	D_1__Firmicutes	D_2__Clostridia	D_3__Clostridiales	D_4__Lachnospiraceae	D_5__Acetitomaculum	D_6__uncultured bacterium
denovo10429	0	0	0	0	0	0	0	0	0	0	0	2	0	0	0	0	0	0	0	0	D_0__Bacteria	D_1__Actinobacteria	D_2__Coriobacteriia	D_3__Coriobacteriales	D_4__Coriobacteriaceae	D_5__uncultured
denovo10855	0	0	0	0	0	0	0	0	0	0	1	2	0	0	0	0	0	0	0	0	D_0__Bacteria	D_1__Firmicutes	D_2__Clostridia	D_3__Clostridiales	D_4__Lachnospiraceae		D_6__uncultured bacterium
denovo10899	0	0	0	0	0	0	0	0	0	0	0	2	0	0	0	1	0	0	1	0	D_0__Bacteria	D_1__Firmicutes					D_6__uncultured bacterium
denovo11052	0	0	0	0	0	0	0	0	0	0	0	2	0	0	0	0	0	0	0	0	D_0__Bacteria	D_1__Firmicutes	D_2__Clostridia	D_3__Clostridiales	D_4__Eubacteriaceae	D_5__Pseudoramibacter
denovo11157	0	0	0	0	0	0	0	0	0	0	1	2	0	0	2	11	0	0	0	0	D_0__Bacteria	D_1__Firmicutes	D_2__Negativicutes	D_3__Selenomonadales	D_4__Veillonellaceae	D_5__uncultured	D_6__uncultured bacterium
denovo11158	0	0	0	0	0	0	0	0	0	0	0	2	0	0	1	3	0	0	0	0	Unassigned
denovo11453	0	0	0	0	0	0	0	0	0	1	0	2	0	0	0	0	0	4	0	0	D_0__Bacteria	D_1__Actinobacteria	D_2__Actinobacteria	D_3__Bifidobacteriales	D_4__Bifidobacteriaceae	D_5__Bifidobacterium	D_6__uncultured bacterium
denovo11573	0	0	0	0	0	0	0	0	0	0	1	2	0	0	0	3	0	0	0	0	D_0__Bacteria	D_1__Firmicutes	D_2__Negativicutes	D_3__Selenomonadales	D_4__Veillonellaceae	D_5__Mitsuokella	D_6__uncultured bacterium
denovo119	0	0	0	0	0	0	0	0	0	0	0	2	0	0	0	3	0	0	0	0	D_0__Bacteria	D_1__Firmicutes	D_2__Erysipelotrichia	D_3__Erysipelotrichales	D_4__Erysipelotrichaceae	D_5__Erysipelotrichaceae UCG-001	D_6__uncultured bacterium
denovo12113	0	0	0	0	0	0	0	0	0	0	0	2	0	0	3	5	0	0	0	0	Unassigned						D_6__uncultured bacterium
denovo12169	0	0	0	0	0	0	0	0	0	2	0	2	0	1	41	4	0	2	1	0	D_0__Bacteria	D_1__Firmicutes	D_2__Negativicutes	D_3__Selenomonadales	D_4__Veillonellaceae	D_5__Mitsuokella	D_6__uncultured bacterium
denovo12501	0	0	0	0	0	0	0	0	0	0	0	2	0	0	3	1	0	0	0	0	Unassigned
denovo12585	0	0	0	0	0	0	1	0	0	0	0	2	0	0	0	0	0	0	0	0	D_0__Bacteria	D_1__Firmicutes	D_2__Bacilli	D_3__Lactobacillales	D_4__Lactobacillaceae	D_5__Lactobacillus
denovo12619	0	0	0	0	0	0	0	1	0	0	1	2	0	0	1	0	0	0	0	1	D_0__Bacteria	D_1__Firmicutes	D_2__Negativicutes	D_3__Selenomonadales	D_4__Veillonellaceae	D_5__Dialister
denovo12644	0	0	0	0	0	0	0	0	0	0	2	2	0	1	1	0	0	1	0	0	D_0__Bacteria	D_1__Firmicutes	D_2__Clostridia	D_3__Clostridiales	D_4__Lachnospiraceae	D_5__Lachnospiraceae NK3A20 group
denovo12709	0	0	0	0	0	0	0	0	0	0	0	2	0	0	0	3	0	0	0	0	D_0__Bacteria	D_1__Firmicutes	D_2__Clostridia	D_3__Clostridiales	D_4__Family XIII	D_5__[Eubacterium] nodatum group
denovo12873	0	0	0	0	0	0	0	0	0	0	0	2	0	0	1	3	0	0	0	0	D_0__Bacteria	D_1__Actinobacteria	D_2__Coriobacteriia	D_3__Coriobacteriales	D_4__Coriobacteriaceae		D_6__uncultured bacterium
denovo12887	0	0	0	0	0	0	0	0	0	0	1	2	0	0	1	0	0	0	1	0	D_0__Bacteria	D_1__Firmicutes	D_2__Bacilli	D_3__Lactobacillales	D_4__Lactobacillaceae	D_5__Lactobacillus	D_6__uncultured bacterium
denovo13283	0	0	0	0	0	0	0	1	0	0	0	2	0	0	1	0	0	0	0	0	D_0__Bacteria	D_1__Actinobacteria	D_2__Coriobacteriia	D_3__Coriobacteriales	D_4__Coriobacteriaceae	D_5__Enterorhabdus	D_6__uncultured bacterium
denovo13402	0	0	0	0	0	0	0	0	0	0	1	2	0	0	0	1	0	0	0	0	D_0__Bacteria	D_1__Firmicutes	D_2__Erysipelotrichia	D_3__Erysipelotrichales	D_4__Erysipelotrichaceae	D_5__Erysipelotrichaceae UCG-006	D_6__uncultured bacterium
denovo13742	0	0	0	1	0	0	1	3	2	12	14	2	0	2	12	775	0	2	2	1	D_0__Bacteria	D_1__Firmicutes	D_2__Negativicutes	D_3__Selenomonadales	D_4__Veillonellaceae	D_5__Megasphaera	D_6__uncultured bacterium
denovo13984	0	0	0	0	0	0	0	0	0	0	2	2	0	0	3	13	0	0	0	0	D_0__Bacteria	D_1__Firmicutes	D_2__Negativicutes	D_3__Selenomonadales	D_4__Veillonellaceae	D_5__Mitsuokella
denovo14077	0	0	0	0	0	0	0	0	0	0	0	2	0	0	0	3	0	0	0	0	D_0__Bacteria	D_1__Firmicutes	D_2__Negativicutes	D_3__Selenomonadales	D_4__Veillonellaceae		D_6__uncultured bacterium
denovo14158	0	0	1	0	0	4	0	0	1	23	8	2	0	56	33	1	0	76	50	56	D_0__Bacteria	D_1__Firmicutes	D_2__Erysipelotrichia	D_3__Erysipelotrichales	D_4__Erysipelotrichaceae	D_5__Catenibacterium	D_6__uncultured bacterium
denovo14160	0	0	0	0	0	0	0	0	0	0	0	2	0	0	0	0	0	0	0	0	D_0__Bacteria	D_1__Actinobacteria	D_2__Coriobacteriia	D_3__Coriobacteriales	D_4__Coriobacteriaceae	D_5__Olsenella
denovo14176	0	0	0	0	0	0	0	0	0	0	3	2	0	0	9	30	0	1	2	0	D_0__Bacteria	D_1__Firmicutes	D_2__Clostridia	D_3__Clostridiales	D_4__Ruminococcaceae	D_5__Ruminococcaceae UCG-005
denovo14270	0	0	0	0	0	0	0	0	0	0	0	2	0	0	0	0	0	0	0	0	D_0__Bacteria	D_1__Firmicutes	D_2__Clostridia	D_3__Clostridiales	D_4__Ruminococcaceae	D_5__Ruminococcaceae UCG-014	D_6__uncultured bacterium
denovo14290	0	0	0	0	0	0	0	1	0	0	0	2	0	0	0	0	0	0	0	0	D_0__Bacteria	D_1__Actinobacteria	D_2__Coriobacteriia	D_3__Coriobacteriales	D_4__Coriobacteriaceae	D_5__Olsenella	D_6__uncultured bacterium
denovo14513	0	0	0	0	0	1	16	18	0	2	1	2	0	1	1	3	0	1	2	5	D_0__Bacteria	D_1__Firmicutes	D_2__Negativicutes	D_3__Selenomonadales	D_4__Veillonellaceae	D_5__Megasphaera	D_6__uncultured Bacteroidetes bacterium
denovo14882	0	0	0	0	0	0	0	0	0	0	5	2	0	1	1	2	0	0	0	0	D_0__Bacteria	D_1__Firmicutes	D_2__Bacilli	D_3__Lactobacillales	D_4__Lactobacillaceae	D_5__Lactobacillus
denovo15099	0	0	0	0	0	0	1	89	0	2	17	2	0	15	10	0	0	0	0	0	D_0__Bacteria	D_1__Firmicutes	D_2__Negativicutes	D_3__Selenomonadales	D_4__Veillonellaceae	D_5__Megasphaera	D_6__uncultured bacterium
denovo1513	0	0	0	0	0	0	0	0	0	0	0	2	0	0	0	0	0	0	0	0	D_0__Bacteria	D_1__Actinobacteria	D_2__Coriobacteriia	D_3__Coriobacteriales	D_4__Coriobacteriaceae	D_5__Olsenella	D_6__uncultured bacterium
denovo15177	0	0	0	0	0	0	0	0	0	0	0	2	0	0	0	0	0	0	0	0	D_0__Bacteria	D_1__Firmicutes	D_2__Negativicutes	D_3__Selenomonadales	D_4__Veillonellaceae	D_5__Dialister
denovo15279	0	0	0	0	0	0	0	0	0	0	0	2	0	0	0	0	0	0	0	0	D_0__Bacteria	D_1__Firmicutes	D_2__Bacilli	D_3__Lactobacillales	D_4__Lactobacillaceae	D_5__Lactobacillus	D_6__uncultured bacterium
denovo15311	0	0	0	0	0	0	0	0	0	0	0	2	0	1	0	2	0	0	0	0	D_0__Bacteria	D_1__Actinobacteria	D_2__Coriobacteriia	D_3__Coriobacteriales	D_4__Coriobacteriaceae		D_6__Proteus mirabilis
denovo15391	0	0	0	0	0	0	0	0	0	0	0	2	0	0	0	0	0	0	0	0	D_0__Bacteria	D_1__Firmicutes	D_2__Clostridia	D_3__Clostridiales	D_4__Ruminococcaceae	D_5__Ruminococcaceae UCG-014	D_6__uncultured bacterium
denovo1547	0	0	0	0	0	1	0	5	0	4	10	2	0	2	27	1	0	8	0	0	D_0__Bacteria	D_1__Firmicutes	D_2__Negativicutes	D_3__Selenomonadales	D_4__Veillonellaceae	D_5__Mitsuokella	D_6__uncultured bacterium
denovo15580	0	0	0	0	0	0	0	0	0	0	0	2	0	0	1	1	0	0	0	0	D_0__Bacteria	D_1__Firmicutes	D_2__Negativicutes	D_3__Selenomonadales	D_4__Veillonellaceae	D_5__Mitsuokella	D_6__uncultured bacterium
denovo15820	0	0	0	0	0	0	0	0	0	0	0	2	0	0	1	0	0	0	0	0	D_0__Bacteria	D_1__Firmicutes	D_2__Clostridia	D_3__Clostridiales	D_4__Lachnospiraceae	D_5__Acetitomaculum	D_6__uncultured bacterium
denovo1586	0	0	0	0	0	0	1	0	0	1	0	2	0	0	7	12	0	0	0	0	D_0__Bacteria	D_1__Firmicutes					D_6__uncultured bacterium
denovo16121	0	0	0	0	0	0	0	0	0	0	0	2	0	0	0	0	0	0	0	0	D_0__Bacteria	D_1__Firmicutes	D_2__Bacilli	D_3__Lactobacillales	D_4__Lactobacillaceae	D_5__Lactobacillus
denovo16133	0	0	0	0	0	0	0	0	0	1	2	2	0	0	0	0	0	0	0	0	D_0__Bacteria	D_1__Firmicutes	D_2__Clostridia	D_3__Clostridiales	D_4__Lachnospiraceae	D_5__Acetitomaculum	D_6__uncultured bacterium
denovo16447	0	0	0	0	0	0	0	0	0	0	0	2	0	0	0	0	0	0	0	0	Unassigned						D_6__uncultured bacterium
denovo16717	0	0	0	0	0	0	0	0	0	2	1	2	0	8	4	1	0	0	0	0	D_0__Bacteria	D_1__Firmicutes	D_2__Negativicutes	D_3__Selenomonadales	D_4__Veillonellaceae	D_5__uncultured	D_6__uncultured bacterium
denovo16876	0	0	0	0	0	0	0	0	0	0	0	2	0	0	0	0	0	0	0	0	Unassigned						D_6__uncultured rumen bacterium
denovo16899	0	0	0	0	0	0	0	0	0	0	2	2	0	7	47	83	0	0	0	0	D_0__Bacteria	D_1__Firmicutes	D_2__Negativicutes	D_3__Selenomonadales	D_4__Veillonellaceae	D_5__Megasphaera	D_6__uncultured bacterium
denovo16918	0	0	0	0	0	0	0	0	0	1	0	2	0	0	0	0	0	0	0	0	Unassigned						D_6__uncultured compost bacterium
denovo17097	0	0	0	0	0	0	0	0	0	0	0	2	0	0	1	0	0	0	0	0	D_0__Bacteria	D_1__Firmicutes	D_2__Clostridia	D_3__Clostridiales	D_4__Eubacteriaceae	D_5__Pseudoramibacter
denovo17184	0	0	0	0	0	0	0	0	0	0	0	2	0	0	1	0	0	0	0	0	Unassigned
denovo17450	0	0	0	0	0	0	0	0	0	0	2	2	0	0	2	4	0	1	0	0	D_0__Bacteria	D_1__Firmicutes	D_2__Negativicutes	D_3__Selenomonadales	D_4__Veillonellaceae	D_5__Mitsuokella	D_6__uncultured bacterium
denovo17465	0	0	0	0	0	0	0	0	0	0	0	2	0	0	0	0	0	0	0	0	Unassigned						D_6__uncultured bacterium
denovo17467	0	0	0	0	0	0	0	0	0	0	0	2	0	0	0	0	0	0	0	0	D_0__Bacteria	D_1__Firmicutes	D_2__Negativicutes	D_3__Selenomonadales	D_4__Veillonellaceae
denovo17725	0	0	0	1	0	0	4	79	0	35	11	2	0	69	29	12	0	2	2	0	D_0__Bacteria	D_1__Firmicutes	D_2__Negativicutes	D_3__Selenomonadales	D_4__Veillonellaceae	D_5__Megasphaera
denovo17884	0	0	0	0	0	0	0	0	0	0	0	2	0	0	0	0	0	0	0	0	D_0__Bacteria	D_1__Firmicutes	D_2__Clostridia	D_3__Clostridiales	D_4__Eubacteriaceae	D_5__Pseudoramibacter	D_6__uncultured bacterium
denovo18148	0	0	0	0	0	0	0	0	0	0	8	2	0	0	1	0	0	1	0	0	D_0__Bacteria	D_1__Firmicutes	D_2__Clostridia	D_3__Clostridiales	D_4__Lachnospiraceae		D_6__uncultured beta proteobacterium
denovo18482	0	0	0	0	0	0	3	318	1	39	19	2	0	86	50	3	0	3	5	0	D_0__Bacteria	D_1__Firmicutes	D_2__Negativicutes	D_3__Selenomonadales	D_4__Veillonellaceae	D_5__Megasphaera	D_6__uncultured bacterium
denovo18537	0	0	0	0	0	0	0	0	0	0	0	2	0	0	0	0	0	0	0	0	D_0__Bacteria	D_1__Firmicutes	D_2__Clostridia	D_3__Clostridiales	D_4__Christensenellaceae	D_5__Christensenellaceae R-7 group
denovo18659	0	0	0	0	0	0	0	1	0	0	0	2	0	0	0	2	0	0	1	4	D_0__Bacteria	D_1__Firmicutes	D_2__Bacilli	D_3__Lactobacillales	D_4__Lactobacillaceae	D_5__Lactobacillus	D_6__uncultured bacterium
denovo18784	0	0	0	0	0	0	2	1	0	3	8	2	0	11	19	10	0	3	0	0	D_0__Bacteria	D_1__Firmicutes	D_2__Negativicutes	D_3__Selenomonadales	D_4__Veillonellaceae	D_5__Megasphaera	D_6__uncultured bacterium
denovo18846	0	0	0	0	0	0	0	0	1	0	0	2	0	0	0	0	0	0	0	0	D_0__Bacteria	D_1__Firmicutes	D_2__Clostridia	D_3__Clostridiales	D_4__Lachnospiraceae	D_5__Acetitomaculum
denovo18884	0	0	0	0	0	0	0	0	0	2	0	2	0	4	6	2	0	0	0	0	D_0__Bacteria	D_1__Firmicutes	D_2__Negativicutes	D_3__Selenomonadales	D_4__Veillonellaceae	D_5__uncultured
denovo19319	0	0	0	0	0	0	0	0	0	0	0	2	0	0	3	4	0	0	0	0	D_0__Bacteria	D_1__Actinobacteria	D_2__Coriobacteriia	D_3__Coriobacteriales	D_4__Coriobacteriaceae		D_6__uncultured bacterium
denovo19687	0	0	0	0	0	0	0	0	0	0	0	2	0	0	0	0	0	0	0	0	D_0__Bacteria	D_1__Actinobacteria	D_2__Coriobacteriia	D_3__Coriobacteriales	D_4__Coriobacteriaceae	D_5__Olsenella	D_6__uncultured bacterium
denovo19949	0	0	0	0	0	0	0	0	0	0	0	2	0	0	0	0	0	0	0	0	Unassigned
denovo20209	0	0	0	1	0	0	0	3	0	2	1	2	0	0	0	4	0	1	1	2	D_0__Bacteria	D_1__Firmicutes	D_2__Bacilli	D_3__Lactobacillales	D_4__Lactobacillaceae	D_5__Lactobacillus	D_6__uncultured bacterium
denovo20392	0	0	0	0	0	0	0	0	0	0	0	2	0	0	1	7	0	0	0	0	D_0__Bacteria	D_1__Firmicutes	D_2__Clostridia	D_3__Clostridiales	D_4__Lachnospiraceae	D_5__Syntrophococcus	D_6__uncultured bacterium
denovo20584	0	0	0	0	0	0	0	0	0	0	1	2	0	0	0	0	0	0	0	0	D_0__Bacteria	D_1__Bacteroidetes	D_2__Bacteroidia	D_3__Bacteroidales	D_4__Prevotellaceae	D_5__Prevotella 2	D_6__uncultured bacterium
denovo20647	0	0	0	0	0	0	0	0	0	0	0	2	0	0	0	0	0	0	0	0	D_0__Bacteria	D_1__Firmicutes	D_2__Clostridia	D_3__Clostridiales	D_4__Ruminococcaceae	D_5__Ruminococcaceae UCG-014	D_6__uncultured bacterium
denovo20724	0	0	0	0	1	0	2	18	0	12	26	2	0	10	50	3	0	25	3	1	D_0__Bacteria	D_1__Firmicutes	D_2__Negativicutes	D_3__Selenomonadales	D_4__Veillonellaceae	D_5__Mitsuokella	D_6__uncultured bacterium
denovo20865	0	0	0	0	0	0	0	0	0	0	0	2	0	0	1	1	0	0	0	0	D_0__Bacteria	D_1__Firmicutes	D_2__Clostridia	D_3__Clostridiales	D_4__Lachnospiraceae		D_6__uncultured bacterium
denovo21204	0	0	0	0	0	0	0	0	0	0	0	2	0	0	2	2	0	0	0	0	D_0__Bacteria	D_1__Actinobacteria	D_2__Coriobacteriia	D_3__Coriobacteriales	D_4__Coriobacteriaceae	D_5__uncultured	D_6__uncultured bacterium
denovo21414	0	0	0	0	0	0	0	0	0	1	3	2	0	7	44	8	0	0	0	0	D_0__Bacteria	D_1__Firmicutes	D_2__Erysipelotrichia	D_3__Erysipelotrichales	D_4__Erysipelotrichaceae	D_5__Erysipelotrichaceae UCG-007
denovo21449	0	0	0	0	0	0	0	0	0	0	0	2	0	0	0	0	0	0	0	0	D_0__Bacteria	D_1__Firmicutes	D_2__Clostridia	D_3__Clostridiales	D_4__Family XIII	D_5__[Eubacterium] nodatum group	D_6__uncultured bacterium
denovo2148	0	0	0	0	0	0	0	0	0	0	0	2	0	1	0	0	0	0	0	0	Unassigned
denovo21643	0	0	0	0	0	0	0	0	0	0	2	2	0	0	6	23	0	0	0	0	D_0__Bacteria	D_1__Firmicutes	D_2__Negativicutes	D_3__Selenomonadales	D_4__Veillonellaceae	D_5__Mitsuokella	D_6__uncultured bacterium
denovo21830	0	0	0	0	0	0	1	4	0	2	0	2	0	2	5	0	0	1	1	0	D_0__Bacteria	D_1__Firmicutes	D_2__Negativicutes	D_3__Selenomonadales	D_4__Veillonellaceae	D_5__Mitsuokella	D_6__uncultured bacterium
denovo21844	0	0	0	0	0	0	0	0	0	0	0	2	0	0	1	0	0	0	0	0	Unassigned						D_6__uncultured bacterium
denovo2208	0	0	0	0	0	0	0	0	0	0	0	2	0	0	1	0	0	0	0	0	D_0__Bacteria	D_1__Firmicutes	D_2__Negativicutes	D_3__Selenomonadales	D_4__Acidaminococcaceae	D_5__Succiniclasticum	D_6__uncultured bacterium
denovo22151	0	0	0	0	0	0	0	0	0	1	2	2	0	1	1	2	0	0	0	0	D_0__Bacteria	D_1__Firmicutes	D_2__Negativicutes	D_3__Selenomonadales	D_4__Veillonellaceae	D_5__Mitsuokella	D_6__uncultured bacterium
denovo22230	0	0	0	0	0	0	0	0	0	0	0	2	0	0	1	4	0	0	0	0	D_0__Bacteria	D_1__Firmicutes	D_2__Erysipelotrichia	D_3__Erysipelotrichales	D_4__Erysipelotrichaceae	D_5__Erysipelotrichaceae UCG-001
denovo22278	0	0	1	0	0	0	0	0	0	0	0	2	0	0	0	0	0	0	0	0	D_0__Bacteria	D_1__Firmicutes	D_2__Bacilli	D_3__Lactobacillales	D_4__Lactobacillaceae	D_5__Lactobacillus
denovo22315	0	0	0	0	0	0	0	0	0	1	1	2	0	0	0	0	0	0	0	0	D_0__Bacteria	D_1__Firmicutes	D_2__Clostridia	D_3__Clostridiales	D_4__Lachnospiraceae	D_5__Butyrivibrio 2	D_6__uncultured bacterium
denovo22377	0	0	0	0	0	0	0	0	0	0	1	2	0	0	1	0	0	0	0	0	D_0__Bacteria	D_1__Firmicutes	D_2__Clostridia	D_3__Clostridiales	D_4__Lachnospiraceae	D_5__Lachnospiraceae NK3A20 group	D_6__uncultured bacterium
denovo22487	0	0	0	0	0	0	0	0	0	0	0	2	0	0	0	1	0	0	0	0	D_0__Bacteria	D_1__Actinobacteria	D_2__Coriobacteriia	D_3__Coriobacteriales	D_4__Coriobacteriaceae	D_5__Olsenella
denovo2258	0	0	0	0	0	0	0	1	0	0	0	2	0	0	0	0	0	0	0	0	D_0__Bacteria	D_1__Firmicutes	D_2__Bacilli	D_3__Lactobacillales
denovo2584	0	0	0	0	0	0	0	0	0	0	0	2	0	0	0	0	0	0	0	0	Unassigned
denovo2997	0	0	0	0	0	0	0	0	0	0	1	2	0	0	0	4	0	0	0	0	D_0__Bacteria	D_1__Firmicutes	D_2__Clostridia	D_3__Clostridiales	D_4__Lachnospiraceae	D_5__Acetitomaculum
denovo3075	0	0	0	0	0	0	0	0	0	0	0	2	0	0	0	0	0	0	0	0	D_0__Bacteria	D_1__Firmicutes	D_2__Bacilli	D_3__Lactobacillales	D_4__Lactobacillaceae	D_5__Lactobacillus
denovo3084	0	0	0	0	0	0	0	0	0	0	0	2	0	0	0	0	0	0	0	0	D_0__Bacteria	D_1__Firmicutes	D_2__Bacilli	D_3__Lactobacillales	D_4__Lactobacillaceae	D_5__Lactobacillus
denovo3357	0	0	0	0	0	0	2	3	0	0	1	2	0	0	2	0	0	1	0	0	D_0__Bacteria	D_1__Firmicutes	D_2__Negativicutes	D_3__Selenomonadales	D_4__Veillonellaceae	D_5__Mitsuokella	D_6__uncultured organism
denovo3446	0	0	0	0	0	0	3	5	0	0	4	2	0	0	0	4	0	0	1	0	D_0__Bacteria	D_1__Firmicutes	D_2__Bacilli	D_3__Lactobacillales	D_4__Lactobacillaceae	D_5__Lactobacillus	D_6__uncultured bacterium
denovo3719	0	2	317	32	0	0	0	1	0	0	0	2	0	0	0	0	0	0	0	0	D_0__Bacteria	D_1__Firmicutes	D_2__Bacilli	D_3__Lactobacillales	D_4__Lactobacillaceae	D_5__Lactobacillus	D_6__uncultured bacterium
denovo3894	0	0	0	0	0	0	0	0	0	0	0	2	0	0	1	2	0	0	0	0	D_0__Bacteria	D_1__Firmicutes	D_2__Negativicutes	D_3__Selenomonadales	D_4__Veillonellaceae	D_5__Mitsuokella	D_6__uncultured bacterium
denovo4275	0	0	0	0	0	0	0	0	0	0	1	2	0	0	2	2	0	0	0	0	D_0__Bacteria	D_1__Firmicutes	D_2__Clostridia	D_3__Clostridiales	D_4__Lachnospiraceae	D_5__[Ruminococcus] gauvreauii group
denovo4508	0	0	0	0	0	1	0	0	0	2	0	2	0	0	0	0	0	0	0	0	D_0__Bacteria	D_1__Firmicutes	D_2__Clostridia	D_3__Clostridiales	D_4__Lachnospiraceae	D_5__Lachnospiraceae NK3A20 group	D_6__Lactobacillus plantarum
denovo4560	0	0	0	0	0	0	0	0	0	0	0	2	0	0	0	0	0	0	0	0	D_0__Bacteria	D_1__Actinobacteria	D_2__Coriobacteriia	D_3__Coriobacteriales	D_4__Coriobacteriaceae		D_6__uncultured bacterium
denovo4570	0	0	0	0	0	0	2	0	0	0	2	2	0	0	1	0	0	0	0	0	Unassigned
denovo4650	0	0	0	0	0	1	0	0	0	0	0	2	0	2	0	8	0	1	0	0	D_0__Bacteria	D_1__Actinobacteria	D_2__Actinobacteria	D_3__Bifidobacteriales	D_4__Bifidobacteriaceae	D_5__Bifidobacterium	D_6__uncultured bacterium
denovo4710	0	0	0	0	0	0	0	1	0	0	0	2	0	0	0	0	0	0	0	0	D_0__Bacteria	D_1__Firmicutes	D_2__Bacilli	D_3__Lactobacillales	D_4__Lactobacillaceae	D_5__Lactobacillus	D_6__uncultured bacterium
denovo4783	0	0	0	0	0	0	0	0	0	0	0	2	0	0	0	0	0	0	0	0	D_0__Bacteria	D_1__Firmicutes	D_2__Bacilli	D_3__Lactobacillales	D_4__Lactobacillaceae	D_5__Lactobacillus	D_6__uncultured bacterium
denovo4948	0	0	0	0	1	0	0	0	6	0	1	2	5	0	0	0	9	0	0	0	D_0__Bacteria	D_1__Firmicutes	D_2__Clostridia	D_3__Clostridiales	D_4__Ruminococcaceae	D_5__Ruminiclostridium 5	D_6__uncultured bacterium
denovo5451	0	0	0	0	0	0	0	2	0	0	0	2	0	0	0	0	0	0	0	0	Unassigned
denovo5524	0	0	0	0	0	0	0	0	0	0	0	2	0	0	0	0	0	0	0	0	D_0__Bacteria	D_1__Firmicutes	D_2__Clostridia	D_3__Clostridiales	D_4__Eubacteriaceae	D_5__Pseudoramibacter
denovo5575	0	0	0	0	0	0	0	3	0	0	3	2	0	3	5	8	0	0	0	0	D_0__Bacteria	D_1__Firmicutes	D_2__Bacilli	D_3__Lactobacillales	D_4__Lactobacillaceae	D_5__Lactobacillus
denovo5729	0	0	0	0	0	0	0	0	0	0	0	2	0	0	1	5	0	0	0	0	Unassigned						D_6__uncultured bacterium
denovo5893	0	0	0	0	0	0	0	0	0	0	0	2	0	0	0	0	0	0	0	0	D_0__Bacteria	D_1__Firmicutes	D_2__Bacilli	D_3__Lactobacillales	D_4__Lactobacillaceae	D_5__Lactobacillus
denovo6018	0	0	0	0	0	0	0	0	0	0	0	2	0	0	0	1	0	0	0	0	D_0__Bacteria	D_1__Actinobacteria	D_2__Coriobacteriia	D_3__Coriobacteriales	D_4__Coriobacteriaceae	D_5__Olsenella	D_6__uncultured bacterium
denovo6063	0	0	0	0	0	0	0	79	0	72	27	2	0	69	10	1	0	4	5	0	D_0__Bacteria	D_1__Firmicutes	D_2__Negativicutes	D_3__Selenomonadales	D_4__Veillonellaceae	D_5__Megasphaera
denovo6275	0	0	0	0	0	0	0	0	0	0	7	2	0	0	3	9	0	1	0	0	D_0__Bacteria	D_1__Firmicutes	D_2__Negativicutes	D_3__Selenomonadales	D_4__Veillonellaceae	D_5__Mitsuokella	D_6__uncultured bacterium
denovo6374	0	0	0	0	0	0	0	0	0	0	0	2	0	0	0	0	0	0	0	0	D_0__Bacteria	D_1__Bacteroidetes	D_2__Bacteroidia	D_3__Bacteroidales	D_4__Prevotellaceae	D_5__Prevotella 1	D_6__uncultured bacterium
denovo6434	0	0	0	0	0	0	0	0	0	0	0	2	0	0	2	2	0	0	0	0	D_0__Bacteria	D_1__Firmicutes	D_2__Clostridia	D_3__Clostridiales	D_4__Lachnospiraceae		D_6__uncultured bacterium
denovo6509	0	0	0	0	0	0	0	0	0	0	1	2	0	0	0	0	0	0	0	0	Unassigned
denovo677	0	0	0	0	0	0	0	0	0	0	1	2	0	0	0	1	0	0	0	0	D_0__Bacteria	D_1__Actinobacteria	D_2__Coriobacteriia	D_3__Coriobacteriales	D_4__Coriobacteriaceae	D_5__Olsenella
denovo7165	0	0	0	1	0	0	0	1	0	0	0	2	0	0	0	2	0	3	0	2	D_0__Bacteria	D_1__Firmicutes	D_2__Negativicutes	D_3__Selenomonadales	D_4__Acidaminococcaceae	D_5__Acidaminococcus
denovo7222	0	0	0	0	0	0	0	1	0	0	0	2	0	0	2	0	0	0	0	0	D_0__Bacteria	D_1__Actinobacteria	D_2__Coriobacteriia	D_3__Coriobacteriales	D_4__Coriobacteriaceae	D_5__Olsenella
denovo729	0	0	0	0	0	0	0	0	0	0	0	2	0	2	1	1	1	4	1	0	D_0__Bacteria	D_1__Firmicutes	D_2__Negativicutes	D_3__Selenomonadales	D_4__Acidaminococcaceae	D_5__Acidaminococcus
denovo7438	0	13	4	2	0	4	18	10	0	0	7	2	0	0	2	2	0	0	0	1	D_0__Bacteria	D_1__Firmicutes	D_2__Bacilli	D_3__Lactobacillales	D_4__Lactobacillaceae	D_5__Lactobacillus	D_6__uncultured bacterium
denovo7620	0	0	0	0	0	0	0	0	0	0	0	2	0	0	0	0	0	0	0	0	D_0__Bacteria	D_1__Firmicutes	D_2__Clostridia	D_3__Clostridiales	D_4__Eubacteriaceae	D_5__Pseudoramibacter	D_6__uncultured bacterium
denovo7768	0	0	0	0	0	0	0	0	0	0	0	2	0	0	1	0	0	0	0	0	D_0__Bacteria	D_1__Firmicutes	D_2__Negativicutes	D_3__Selenomonadales	D_4__Veillonellaceae	D_5__Dialister
denovo7870	0	0	0	0	0	1	85	59	0	1	4	2	0	4	7	2	0	2	1	0	D_0__Bacteria	D_1__Firmicutes	D_2__Clostridia	D_3__Clostridiales			D_6__uncultured bacterium
denovo8071	0	0	0	0	0	0	9	13	0	4	0	2	0	0	1	5	0	2	0	5	D_0__Bacteria	D_1__Firmicutes	D_2__Bacilli	D_3__Lactobacillales	D_4__Lactobacillaceae	D_5__Lactobacillus
denovo8247	0	0	0	0	0	0	0	0	1	0	3	2	0	0	1	1	0	3	0	0	D_0__Bacteria	D_1__Firmicutes	D_2__Clostridia	D_3__Clostridiales	D_4__Lachnospiraceae	D_5__Lachnospiraceae NK3A20 group	D_6__uncultured bacterium
denovo8398	0	0	0	0	0	0	2	19	0	0	0	2	0	0	0	0	0	0	0	0	D_0__Bacteria	D_1__Firmicutes	D_2__Negativicutes	D_3__Selenomonadales	D_4__Veillonellaceae	D_5__Megasphaera
denovo8453	0	0	0	0	0	0	0	0	0	0	3	2	0	0	6	12	0	0	0	0	D_0__Bacteria	D_1__Firmicutes	D_2__Negativicutes	D_3__Selenomonadales	D_4__Veillonellaceae	D_5__Mitsuokella
denovo8476	0	0	0	0	0	0	0	0	0	0	0	2	0	0	1	0	0	0	0	0	D_0__Bacteria	D_1__Firmicutes	D_2__Negativicutes	D_3__Selenomonadales	D_4__Veillonellaceae	D_5__Dialister
denovo8555	0	0	0	0	0	0	0	0	0	3	0	2	0	5	2	0	0	0	0	0	D_0__Bacteria	D_1__Firmicutes	D_2__Negativicutes	D_3__Selenomonadales	D_4__Veillonellaceae	D_5__Mitsuokella	D_6__uncultured bacterium
denovo8818	0	0	0	0	0	0	3	14	0	0	16	2	0	5	28	36	0	0	0	0	D_0__Bacteria	D_1__Firmicutes	D_2__Bacilli	D_3__Lactobacillales	D_4__Lactobacillaceae	D_5__Lactobacillus
denovo8842	0	0	0	0	0	0	0	0	0	0	0	2	0	0	0	0	0	0	0	0	D_0__Bacteria	D_1__Firmicutes	D_2__Clostridia	D_3__Clostridiales	D_4__Lachnospiraceae	D_5__Lachnospiraceae NK3A20 group	D_6__uncultured bacterium
denovo8997	0	0	0	0	0	0	0	0	0	0	4	2	0	0	2	10	0	0	0	0	D_0__Bacteria	D_1__Firmicutes	D_2__Negativicutes	D_3__Selenomonadales	D_4__Veillonellaceae	D_5__Mitsuokella
denovo9045	0	0	0	0	0	1	2	0	0	0	2	2	0	0	0	0	0	0	0	0	Unassigned						D_6__uncultured organism
denovo9119	0	0	0	0	0	0	0	0	0	0	0	2	0	0	0	0	0	0	0	0	Unassigned
denovo9125	0	0	0	0	0	0	0	0	0	0	0	2	0	0	0	0	0	0	0	0	Unassigned						D_6__uncultured bacterium
denovo9168	0	0	0	0	0	0	0	0	0	0	1	2	0	0	2	1	0	0	0	0	Unassigned						D_6__uncultured bacterium
denovo9294	0	0	0	0	0	0	0	0	0	0	1	2	0	0	39	44	0	0	0	0	D_0__Bacteria	D_1__Firmicutes	D_2__Clostridia	D_3__Clostridiales	D_4__Lachnospiraceae	D_5__Syntrophococcus
denovo9478	0	0	0	0	0	0	0	0	0	0	0	2	0	0	0	0	0	0	0	0	D_0__Bacteria	D_1__Firmicutes	D_2__Clostridia	D_3__Clostridiales	D_4__Ruminococcaceae	D_5__Ruminococcaceae NK4A214 group	D_6__uncultured bacterium
denovo9563	0	0	0	0	0	0	0	0	0	0	0	2	0	0	0	0	0	0	0	0	D_0__Bacteria	D_1__Firmicutes	D_2__Clostridia	D_3__Clostridiales	D_4__Ruminococcaceae	D_5__Ruminococcaceae UCG-014	D_6__uncultured delta proteobacterium
denovo9574	0	0	0	0	0	0	0	0	0	0	0	2	0	0	0	0	0	0	0	0	D_0__Bacteria	D_1__Firmicutes	D_2__Negativicutes	D_3__Selenomonadales	D_4__Veillonellaceae	D_5__Megasphaera	D_6__uncultured bacterium
denovo9626	0	0	0	0	0	0	0	0	0	0	0	2	0	0	0	1	0	0	0	0	D_0__Bacteria	D_1__Firmicutes	D_2__Bacilli	D_3__Lactobacillales	D_4__Lactobacillaceae	D_5__Lactobacillus	D_6__uncultured bacterium
denovo9767	0	0	0	0	0	2	0	0	0	0	2	2	0	3	0	0	0	0	0	0	D_0__Bacteria	D_1__Firmicutes	D_2__Bacilli	D_3__Lactobacillales	D_4__Lactobacillaceae	D_5__Lactobacillus	D_6__uncultured rumen bacterium
denovo9785	0	0	0	0	0	0	0	0	0	0	0	2	0	0	0	2	0	0	0	0	D_0__Bacteria	D_1__Actinobacteria	D_2__Actinobacteria	D_3__Bifidobacteriales	D_4__Bifidobacteriaceae	D_5__Bifidobacterium
denovo19695	344	53	8	0	260	10	1	1	289	9	6	1	317	7	1	1	356	3	1	0	D_0__Bacteria	D_1__Proteobacteria	D_2__Betaproteobacteria	D_3__Burkholderiales	D_4__Comamonadaceae	D_5__Aquabacterium	D_6__uncultured bacterium
denovo5685	220	40	4	1	310	9	8	3	202	9	3	1	204	4	2	0	198	7	1	1	D_0__Bacteria	D_1__Proteobacteria	D_2__Betaproteobacteria	D_3__Neisseriales	D_4__Neisseriaceae	D_5__Uruburuella	D_6__uncultured bacterium
denovo2078	185	29	0	0	188	11	0	0	192	1	4	1	229	7	1	0	206	4	0	0	D_0__Bacteria	D_1__Proteobacteria	D_2__Betaproteobacteria	D_3__Burkholderiales	D_4__Comamonadaceae	D_5__uncultured
denovo21578	168	45	2	0	93	10	1	1	116	5	2	1	89	4	1	0	160	5	4	1	D_0__Bacteria	D_1__Proteobacteria	D_2__Betaproteobacteria	D_3__Burkholderiales	D_4__Comamonadaceae	D_5__Simplicispira	D_6__uncultured bacterium
denovo6388	163	155	0	0	166	64	13	0	129	16	6	1	216	48	7	0	147	2	0	0	D_0__Bacteria	D_1__Firmicutes	D_2__Negativicutes	D_3__Selenomonadales	D_4__Veillonellaceae		D_6__uncultured bacterium
denovo18598	136	0	0	0	143	1	0	0	175	0	0	1	129	0	0	0	158	2	0	0	D_0__Bacteria	D_1__Spirochaetae	D_2__Spirochaetes	D_3__Spirochaetales	D_4__Spirochaetaceae	D_5__Treponema 2	D_6__uncultured bacterium
denovo8721	104	0	0	0	138	1	0	0	102	15	3	1	90	0	0	0	95	0	0	0	D_0__Bacteria	D_1__Bacteroidetes	D_2__Bacteroidia	D_3__Bacteroidales	D_4__Prevotellaceae	D_5__Prevotella 1	D_6__uncultured rumen bacterium
denovo11284	98	21	3	0	150	4	0	2	101	12	5	1	112	12	3	0	106	2	1	0	D_0__Bacteria	D_1__Proteobacteria	D_2__Betaproteobacteria	D_3__Rhodocyclales	D_4__Rhodocyclaceae	D_5__Candidatus Accumulibacter	D_6__uncultured organism
denovo8539	81	7	0	0	107	5	5	1	45	7	0	1	63	4	0	0	68	5	0	0	D_0__Bacteria	D_1__Proteobacteria	D_2__Alphaproteobacteria	D_3__Sphingomonadales	D_4__Sphingomonadaceae	D_5__Sphingobium
denovo22392	67	10	1	0	48	3	1	0	53	1	0	1	25	1	0	0	36	2	1	0	D_0__Bacteria	D_1__Proteobacteria	D_2__Gammaproteobacteria	D_3__Pseudomonadales	D_4__Moraxellaceae	D_5__Psychrobacter	D_6__uncultured bacterium
denovo11762	63	20	4	0	157	23	2	0	59	10	3	1	93	2	0	0	46	1	0	0	D_0__Bacteria	D_1__Bacteroidetes	D_2__Bacteroidia	D_3__Bacteroidales	D_4__Rikenellaceae	D_5__U29-B03
denovo5467	61	11	0	0	58	2	0	0	59	3	0	1	53	4	0	0	57	4	0	0	D_0__Bacteria	D_1__Proteobacteria	D_2__Betaproteobacteria	D_3__Rhodocyclales	D_4__Rhodocyclaceae	D_5__Propionivibrio
denovo11396	56	3	1	1	68	0	0	0	99	8	1	1	75	0	0	0	72	0	0	1	D_0__Bacteria	D_1__Proteobacteria	D_2__Gammaproteobacteria	D_3__Xanthomonadales	D_4__Xanthomonadaceae	D_5__Dokdonella	D_6__uncultured bacterium
denovo18434	47	35	1	5	51	19	9	5	61	8	3	1	89	14	8	0	78	13	4	4	D_0__Bacteria	D_1__Proteobacteria	D_2__Alphaproteobacteria	D_3__Rhodobacterales	D_4__Rhodobacteraceae	D_5__Rhodovulum	D_6__uncultured bacterium
denovo13423	46	9	0	0	97	0	0	0	57	1	0	1	56	0	0	0	59	0	0	0	D_0__Bacteria	D_1__Bacteroidetes	D_2__Flavobacteriia	D_3__Flavobacteriales	D_4__NS9 marine group
denovo444	46	22	1	0	46	10	3	0	43	10	5	1	68	4	1	0	42	4	0	0	D_0__Bacteria	D_1__Fusobacteria	D_2__Fusobacteriia	D_3__Fusobacteriales	D_4__Leptotrichiaceae	D_5__Leptotrichia	D_6__uncultured bacterium
denovo9675	46	5	0	0	33	4	2	1	30	3	0	1	47	6	1	0	48	1	1	1	D_0__Bacteria	D_1__Proteobacteria	D_2__Betaproteobacteria	D_3__Burkholderiales	D_4__Comamonadaceae	D_5__Comamonas	D_6__uncultured bacterium
denovo5962	40	12	1	0	15	1	1	0	14	3	6	1	22	1	1	0	9	2	0	0	D_0__Bacteria	D_1__Firmicutes	D_2__Clostridia	D_3__Clostridiales	D_4__Lachnospiraceae
denovo14126	35	5	0	0	39	7	1	0	28	3	0	1	28	1	1	0	20	5	1	0	D_0__Bacteria	D_1__Proteobacteria	D_2__Alphaproteobacteria	D_3__Sphingomonadales	D_4__Sphingomonadaceae	D_5__Novosphingobium	D_6__uncultured bacterium
denovo5326	31	39	1	0	164	25	18	1	45	47	14	1	132	3	0	0	46	2	1	0	D_0__Bacteria	D_1__Firmicutes	D_2__Clostridia	D_3__Clostridiales	D_4__Ruminococcaceae	D_5__Oscillibacter	D_6__uncultured alpha proteobacterium
denovo6377	27	11	0	0	49	26	2	1	38	37	7	1	43	0	0	0	43	2	0	1	D_0__Bacteria	D_1__Bacteroidetes	D_2__Bacteroidia	D_3__Bacteroidales	D_4__uncultured	D_5__uncultured bacterium	D_6__uncultured bacterium
denovo14691	26	5	0	0	34	3	0	0	26	1	0	1	27	1	0	0	16	1	0	0	D_0__Bacteria	D_1__Proteobacteria	D_2__Betaproteobacteria	D_3__Rhodocyclales	D_4__Rhodocyclaceae	D_5__Dechloromonas	D_6__uncultured bacterium
denovo17345	24	11	1	0	22	6	4	1	24	0	0	1	16	0	0	0	30	5	1	0	D_0__Bacteria	D_1__Proteobacteria	D_2__Alphaproteobacteria	D_3__Rhizobiales	D_4__Hyphomicrobiaceae	D_5__Devosia
denovo10923	23	4	0	0	15	3	2	0	23	2	0	1	29	0	0	0	40	3	1	0	D_0__Bacteria	D_1__Proteobacteria	D_2__Alphaproteobacteria	D_3__Rhodobacterales	D_4__Rhodobacteraceae	D_5__Defluviimonas
denovo8890	22	11	1	1	13	3	4	0	30	1	1	1	20	4	0	0	33	2	0	1	D_0__Bacteria	D_1__Proteobacteria	D_2__Alphaproteobacteria	D_3__Rhodobacterales	D_4__Rhodobacteraceae	D_5__Paracocccus
denovo20042	19	2	0	0	7	1	0	0	11	3	2	1	7	1	2	0	5	0	0	0	D_0__Bacteria	D_1__Cloacimonetes	D_2__W5	D_3__uncultured bacterium	D_4__uncultured bacterium	D_5__uncultured bacterium	D_6__uncultured bacterium
denovo11744	17	3	0	0	6	0	0	0	8	0	1	1	11	1	0	0	3	1	0	0	D_0__Bacteria	D_1__Bacteroidetes	D_2__Bacteroidetes vadinHA17	D_3__uncultured bacterium	D_4__uncultured bacterium	D_5__uncultured bacterium
denovo4096	17	2	0	0	7	1	0	0	9	34	9	1	8	5	1	0	8	14	1	0	D_0__Bacteria	D_1__Firmicutes	D_2__Negativicutes	D_3__Selenomonadales	D_4__Acidaminococcaceae		D_6__uncultured bacterium
denovo14872	16	6	0	0	12	3289	615	42	10	0	1	1	8	7	0	0	8	4	1	0	D_0__Bacteria	D_1__Proteobacteria	D_2__Gammaproteobacteria	D_3__Enterobacteriales	D_4__Enterobacteriaceae	D_5__Escherichia-Shigella
denovo3503	16	0	0	0	1	1	0	0	36	12	7	1	12	0	0	0	17	2	0	0	D_0__Bacteria	D_1__Firmicutes	D_2__Clostridia	D_3__Clostridiales	D_4__Ruminococcaceae	D_5__Ruminococcaceae UCG-014
denovo1189	13	0	0	0	18	0	1	0	17	4	1	1	21	1	0	0	11	0	0	0	D_0__Bacteria	D_1__Firmicutes	D_2__Erysipelotrichia	D_3__Erysipelotrichales	D_4__Erysipelotrichaceae	D_5__Erysipelotrichaceae UCG-004	D_6__uncultured bacterium
denovo21315	13	3	0	0	5	12	3	0	12	88	12	1	9	2	0	0	13	0	0	0	D_0__Bacteria	D_1__Firmicutes	D_2__Clostridia	D_3__Clostridiales	D_4__Lachnospiraceae	D_5__Moryella	D_6__uncultured bacterium
denovo21410	12	0	0	0	17	0	0	0	15	6	0	1	17	1	0	0	6	1	0	0	D_0__Bacteria	D_1__Firmicutes	D_2__Erysipelotrichia	D_3__Erysipelotrichales	D_4__Erysipelotrichaceae	D_5__Erysipelotrichaceae UCG-004
denovo13857	11	2	1	0	6	6	1	0	8	0	0	1	7	0	1	0	10	2	0	0	D_0__Bacteria	D_1__Proteobacteria	D_2__Alphaproteobacteria	D_3__Rhodospirillales	D_4__Acetobacteraceae	D_5__Acidocella	D_6__uncultured bacterium
denovo17078	11	0	0	0	3	0	0	0	20	7	0	1	15	0	0	0	7	0	0	0	Unassigned						D_6__uncultured bacterium
denovo15897	10	2	0	1	4	1	0	0	8	0	2	1	24	0	0	0	20	0	0	0	D_0__Bacteria	D_1__Proteobacteria	D_2__Betaproteobacteria	D_3__Hydrogenophilales	D_4__Hydrogenophilaceae	D_5__uncultured
denovo19470	10	0	1	0	23	3	0	0	16	3	1	1	10	3	0	0	27	7	4	1	D_0__Bacteria	D_1__Firmicutes	D_2__Clostridia	D_3__Clostridiales	D_4__Family XIII	D_5__[Eubacterium] brachy group
denovo9872	10	7	0	0	6	6	10	0	5	5	7	1	5	11	1	0	14	8	2	3	D_0__Bacteria	D_1__Actinobacteria	D_2__Actinobacteria	D_3__Bifidobacteriales	D_4__Bifidobacteriaceae	D_5__Pseudoscardovia	D_6__uncultured bacterium
denovo16864	9	1	0	0	3	0	0	0	4	2	0	1	12	0	1	0	2	0	0	0	D_0__Bacteria	D_1__Firmicutes	D_2__Erysipelotrichia	D_3__Erysipelotrichales	D_4__Erysipelotrichaceae	D_5__Erysipelotrichaceae UCG-004
denovo17318	9	50	4	0	3	0	0	0	2	2	4	1	1	0	0	0	4	1	0	1	D_0__Bacteria	D_1__Firmicutes	D_2__Clostridia	D_3__Clostridiales	D_4__Lachnospiraceae	D_5__Lachnospiraceae NK3A20 group	D_6__uncultured bacterium
denovo15843	8	0	0	0	5	10	27	53	3	2	1	1	4	35	7	0	7	34	25	12	D_0__Bacteria	D_1__Actinobacteria	D_2__Actinobacteria	D_3__Bifidobacteriales	D_4__Bifidobacteriaceae	D_5__Bifidobacterium
denovo219	8	10	1	0	20	0	1	0	9	4	2	1	10	0	0	0	10	4	1	0	D_0__Bacteria	D_1__Firmicutes	D_2__Clostridia	D_3__Clostridiales	D_4__Lachnospiraceae	D_5__Shuttleworthia
denovo10415	7	8	0	0	5	0	0	0	6	20	1	1	3	10	1	0	3	0	0	0	D_0__Bacteria	D_1__Bacteroidetes	D_2__Bacteroidia	D_3__Bacteroidales	D_4__Prevotellaceae	D_5__Prevotella 7	D_6__uncultured bacterium
denovo20371	7	2	0	0	0	3	0	0	9	29	0	1	3	3	0	0	6	8	0	0	D_0__Bacteria	D_1__Firmicutes	D_2__Negativicutes	D_3__Selenomonadales	D_4__Veillonellaceae	D_5__Megasphaera
denovo15436	6	1	0	0	4	4	7	0	4	10	79	1	5	13	19	1	5	15	10	9	D_0__Bacteria	D_1__Actinobacteria	D_2__Coriobacteriia	D_3__Coriobacteriales	D_4__Coriobacteriaceae	D_5__Collinsella	D_6__uncultured bacterium
denovo9988	6	4	1	0	10	0	0	0	3	0	0	1	7	0	0	0	5	0	0	0	D_0__Bacteria	D_1__Proteobacteria	D_2__Alphaproteobacteria	D_3__Rickettsiales	D_4__Rickettsiales Incertae Sedis	D_5__Candidatus Odyssella	D_6__uncultured bacterium
denovo6526	5	0	0	0	4	2	1	0	3	0	0	1	1	1	0	0	2	2	0	0	D_0__Bacteria	D_1__Saccharibacteria	D_2__uncultured bacterium	D_3__uncultured bacterium	D_4__uncultured bacterium	D_5__uncultured bacterium	D_6__uncultured bacterium
denovo1054	4	24	20	2	3	1	3	0	0	0	1	1	1	0	1	0	1	0	0	0	D_0__Bacteria	D_1__Firmicutes	D_2__Clostridia	D_3__Clostridiales	D_4__Peptostreptococcaceae	D_5__Intestinibacter	D_6__uncultured bacterium
denovo7142	4	5	2	3	1	0	0	0	1	1	0	1	0	0	0	0	0	0	0	0	D_0__Bacteria	D_1__Bacteroidetes	D_2__Sphingobacteriia	D_3__Sphingobacteriales	D_4__Chitinophagaceae	D_5__uncultured	D_6__uncultured bacterium
denovo9176	4	0	0	0	1	4	0	0	4	9	0	1	8	0	0	0	4	4	3	1	D_0__Bacteria	D_1__Firmicutes	D_2__Negativicutes	D_3__Selenomonadales	D_4__Veillonellaceae
denovo16383	3	5	0	0	0	1	0	0	7	5	1	1	3	1	0	0	2	0	0	0	D_0__Bacteria	D_1__Bacteroidetes	D_2__Bacteroidia	D_3__Bacteroidales	D_4__Bacteroidales S24-7 group	D_5__uncultured bacterium	D_6__uncultured bacterium
denovo16709	3	0	0	0	1	0	0	0	3	1	1	1	5	0	0	0	2	1	0	0	D_0__Bacteria	D_1__Firmicutes	D_2__Clostridia	D_3__Clostridiales	D_4__Ruminococcaceae	D_5__Ruminiclostridium 5
denovo19346	3	140	3	1	3	23	9	1	5	28	8	1	3	24	1	3	8	2	0	0	D_0__Bacteria	D_1__Bacteroidetes	D_2__Bacteroidia	D_3__Bacteroidales	D_4__Prevotellaceae	D_5__Prevotella 7	D_6__uncultured bacterium
denovo13048	2	0	0	0	1	0	0	0	0	0	0	1	1	0	0	0	2	0	0	0	D_0__Bacteria	D_1__Proteobacteria	D_2__Betaproteobacteria	D_3__Rhodocyclales	D_4__Rhodocyclaceae	D_5__uncultured	D_6__uncultured bacterium
denovo17666	2	0	0	0	0	0	0	0	0	0	0	1	1	0	0	0	0	0	0	0	D_0__Bacteria	D_1__Spirochaetae	D_2__Spirochaetes	D_3__Spirochaetales	D_4__Leptospiraceae	D_5__Leptospira	D_6__uncultured bacterium
denovo5547	2	103	4	0	1	120	13	1	1	30	0	1	3	111	4	0	2	4	0	0	D_0__Bacteria	D_1__Bacteroidetes	D_2__Bacteroidia	D_3__Bacteroidales	D_4__Prevotellaceae	D_5__Prevotella 7
denovo8192	2	0	0	0	1	0	0	0	2	1	0	1	1	2	0	0	1	30	3	0	D_0__Bacteria	D_1__Firmicutes	D_2__Negativicutes	D_3__Selenomonadales	D_4__Veillonellaceae	D_5__Dialister
denovo8928	2	0	0	0	0	2	0	0	1	7	6	1	0	0	0	0	0	0	0	0	D_0__Bacteria	D_1__Bacteroidetes	D_2__Bacteroidia	D_3__Bacteroidales	D_4__Prevotellaceae	D_5__Prevotella 1	D_6__uncultured bacterium
denovo10442	1	28	2038	2587	0	0	0	1	0	0	1	1	0	0	0	0	0	0	7	93	D_0__Bacteria	D_1__Firmicutes	D_2__Bacilli	D_3__Lactobacillales	D_4__Lactobacillaceae	D_5__Lactobacillus	D_6__uncultured bacterium
denovo10932	1	0	0	0	2	5	1	0	5	0	0	1	2	0	0	0	6	1	0	0	D_0__Bacteria	D_1__Planctomycetes	D_2__Planctomycetacia	D_3__Planctomycetales	D_4__Planctomycetaceae	D_5__Planctomyces	D_6__uncultured bacterium
denovo14805	1	0	0	0	0	0	0	0	0	0	0	1	0	0	0	0	3	0	0	0	D_0__Bacteria	D_1__Proteobacteria	D_2__Deltaproteobacteria	D_3__Bdellovibrionales	D_4__Bdellovibrionaceae	D_5__Bdellovibrio	D_6__uncultured bacterium
denovo17134	1	0	0	0	0	3	0	0	0	1	0	1	0	0	0	0	1	0	0	0	D_0__Bacteria	D_1__Bacteroidetes	D_2__Bacteroidia	D_3__Bacteroidales	D_4__Prevotellaceae	D_5__Prevotella 7
denovo18785	1	4	0	0	3	0	1	0	1	0	0	1	1	0	0	0	0	1	0	0	D_0__Bacteria	D_1__Proteobacteria	D_2__Alphaproteobacteria	D_3__Rhodobacterales	D_4__Rhodobacteraceae	D_5__Paracocccus	D_6__uncultured bacterium
denovo19509	1	2	3	5	1	0	1	0	1	0	0	1	0	0	0	0	0	0	0	0	D_0__Bacteria	D_1__Firmicutes	D_2__Clostridia	D_3__Thermoanaerobacterales	D_4__Thermoanaerobacteraceae	D_5__Gelria
denovo21380	1	11	0	0	0	5	0	0	1	9	6	1	0	30	0	0	0	0	0	0	D_0__Bacteria	D_1__Bacteroidetes	D_2__Bacteroidia	D_3__Bacteroidales	D_4__Prevotellaceae	D_5__Prevotella 7	D_6__uncultured bacterium
denovo21486	1	3	0	0	1	1	0	0	2	0	0	1	2	0	0	0	1	0	0	0	D_0__Bacteria	D_1__Firmicutes	D_2__Negativicutes	D_3__Selenomonadales	D_4__Veillonellaceae		D_6__uncultured bacterium
denovo2410	1	0	0	0	6	0	0	0	38	7	5	1	8	0	0	0	7	0	0	0	Unassigned						D_6__uncultured bacterium
denovo3131	1	0	0	0	0	1	0	0	3	7	2	1	2	2	0	0	1	0	0	0	D_0__Bacteria	D_1__Bacteroidetes	D_2__Bacteroidia	D_3__Bacteroidales	D_4__Prevotellaceae	D_5__Prevotella 1	D_6__uncultured bacterium
denovo3509	1	2	0	0	0	0	0	0	0	0	0	1	0	1	2	0	1	717	598	24	D_0__Bacteria	D_1__Proteobacteria	D_2__Gammaproteobacteria	D_3__Aeromonadales	D_4__Succinivibrionaceae	D_5__Succinivibrio	D_6__uncultured bacterium
denovo6292	1	0	2	0	0	0	0	1	0	0	0	1	0	1	0	0	0	0	0	0	D_0__Bacteria	D_1__Bacteroidetes	D_2__Sphingobacteriia	D_3__Sphingobacteriales	D_4__Chitinophagaceae	D_5__uncultured
denovo8960	1	0	0	0	3	0	1	0	4	3	5	1	7	0	0	0	1	1	1	1	D_0__Bacteria	D_1__Firmicutes	D_2__Clostridia	D_3__Clostridiales	D_4__Ruminococcaceae	D_5__Papillibacter	D_6__uncultured bacterium
denovo101	0	0	0	0	0	0	0	0	0	0	2	1	0	0	0	0	0	0	0	0	D_0__Bacteria	D_1__Bacteroidetes	D_2__Bacteroidia	D_3__Bacteroidales	D_4__Prevotellaceae	D_5__Prevotella 1	D_6__uncultured organism
denovo10205	0	0	0	0	0	0	0	0	0	0	4	1	0	0	3	0	0	1	0	0	D_0__Bacteria	D_1__Firmicutes	D_2__Clostridia	D_3__Clostridiales	D_4__Lachnospiraceae	D_5__Lachnospiraceae NK3A20 group
denovo10212	0	0	0	0	0	0	0	0	0	0	2	1	0	0	1	0	0	0	0	0	D_0__Bacteria	D_1__Firmicutes	D_2__Clostridia	D_3__Clostridiales	D_4__Lachnospiraceae	D_5__Butyrivibrio 2
denovo10219	0	0	0	0	0	0	0	0	0	0	0	1	0	0	1	1	0	0	0	0	D_0__Bacteria	D_1__Firmicutes	D_2__Negativicutes	D_3__Selenomonadales	D_4__Veillonellaceae	D_5__Mitsuokella
denovo10285	0	0	0	0	0	0	0	0	0	0	5	1	0	2	9	1	0	2	0	2	D_0__Bacteria	D_1__Firmicutes	D_2__Clostridia	D_3__Clostridiales	D_4__Lachnospiraceae	D_5__[Ruminococcus] gauvreauii group
denovo10439	0	0	0	0	0	0	0	0	0	0	0	1	0	0	1	0	0	1	1	0	Unassigned						D_6__uncultured organism
denovo10441	0	0	0	0	0	0	0	0	0	0	0	1	1	2	0	0	0	0	0	0	D_0__Bacteria	D_1__Firmicutes	D_2__Erysipelotrichia	D_3__Erysipelotrichales	D_4__Erysipelotrichaceae	D_5__Catenibacterium	D_6__uncultured bacterium
denovo10541	0	1	0	0	0	0	3	0	0	0	0	1	0	0	0	0	0	0	0	0	D_0__Bacteria	D_1__Firmicutes	D_2__Bacilli	D_3__Lactobacillales	D_4__Lactobacillaceae	D_5__Lactobacillus	D_6__uncultured bacterium
denovo1057	0	0	0	0	0	0	0	0	0	0	1	1	0	0	1	2	0	0	0	1	D_0__Bacteria	D_1__Firmicutes	D_2__Erysipelotrichia	D_3__Erysipelotrichales	D_4__Erysipelotrichaceae	D_5__Erysipelotrichaceae UCG-001	D_6__uncultured bacterium
denovo10661	0	0	0	0	0	0	0	0	0	0	0	1	0	0	2	0	0	0	0	0	D_0__Bacteria	D_1__Firmicutes	D_2__Negativicutes	D_3__Selenomonadales	D_4__Veillonellaceae	D_5__Dialister	D_6__uncultured bacterium
denovo10691	0	0	0	0	0	0	0	0	0	13	2	1	0	0	0	0	0	0	0	0	D_0__Bacteria	D_1__Bacteroidetes	D_2__Bacteroidia	D_3__Bacteroidales	D_4__Prevotellaceae
denovo10865	0	0	5	9	0	0	0	0	0	0	2	1	0	0	1	1	0	0	0	4	D_0__Bacteria	D_1__Firmicutes	D_2__Bacilli	D_3__Lactobacillales	D_4__Lactobacillaceae	D_5__Lactobacillus	D_6__uncultured bacterium
denovo10915	0	0	0	0	0	0	0	0	0	0	0	1	0	0	0	0	0	0	1	0	Unassigned						D_6__uncultured bacterium
denovo11026	0	0	0	0	0	0	0	0	0	0	0	1	0	0	0	0	0	0	0	0	D_0__Bacteria	D_1__Actinobacteria	D_2__Coriobacteriia	D_3__Coriobacteriales	D_4__Coriobacteriaceae	D_5__uncultured	D_6__uncultured bacterium
denovo11075	0	0	0	3	0	0	0	0	0	0	0	1	0	0	0	0	0	0	0	0	Unassigned						D_6__uncultured bacterium
denovo11128	0	0	0	0	0	0	0	0	0	0	0	1	0	1	2	6	0	0	0	0	Unassigned						D_6__uncultured bacterium
denovo11245	0	0	0	0	0	0	0	0	0	0	0	1	0	0	1	0	0	0	0	0	D_0__Bacteria	D_1__Firmicutes	D_2__Clostridia	D_3__Clostridiales	D_4__Lachnospiraceae	D_5__Lachnospiraceae NK3A20 group
denovo11278	0	0	0	0	0	0	0	0	0	0	2	1	0	0	0	0	0	0	0	0	D_0__Bacteria	D_1__Firmicutes	D_2__Clostridia	D_3__Clostridiales	D_4__Lachnospiraceae	D_5__Acetitomaculum
denovo11296	0	0	0	0	0	0	0	0	0	0	3	1	0	0	6	3	0	0	1	0	D_0__Bacteria	D_1__Firmicutes	D_2__Negativicutes	D_3__Selenomonadales	D_4__Veillonellaceae	D_5__Dialister	D_6__uncultured bacterium
denovo11329	0	0	0	0	0	0	0	2	0	0	1	1	0	0	0	0	0	0	0	0	D_0__Bacteria	D_1__Firmicutes	D_2__Negativicutes	D_3__Selenomonadales	D_4__Veillonellaceae	D_5__Megasphaera	D_6__uncultured bacterium
denovo11387	0	0	0	0	0	0	0	0	0	0	0	1	0	0	0	3	0	0	0	0	D_0__Bacteria	D_1__Firmicutes	D_2__Negativicutes	D_3__Selenomonadales	D_4__Veillonellaceae	D_5__uncultured	D_6__uncultured bacterium
denovo1141	0	0	0	0	0	0	0	1	0	0	0	1	0	0	0	1	0	0	0	0	D_0__Bacteria	D_1__Firmicutes	D_2__Bacilli	D_3__Lactobacillales	D_4__Lactobacillaceae	D_5__Lactobacillus
denovo11535	0	0	0	0	0	0	0	0	0	0	0	1	0	1	0	1	0	0	0	0	D_0__Bacteria	D_1__Firmicutes	D_2__Clostridia	D_3__Clostridiales	D_4__Lachnospiraceae	D_5__Blautia	D_6__uncultured bacterium
denovo11541	0	0	0	0	0	0	0	0	0	0	4	1	0	0	19	11	0	0	0	0	Unassigned						D_6__uncultured bacterium
denovo11689	0	0	3	27	0	0	0	1	0	0	0	1	0	0	0	0	0	0	0	0	D_0__Bacteria	D_1__Firmicutes	D_2__Bacilli	D_3__Lactobacillales	D_4__Lactobacillaceae	D_5__Lactobacillus
denovo11826	0	0	0	0	0	0	0	0	0	0	0	1	0	2	1	0	0	3	0	0	D_0__Bacteria	D_1__Firmicutes	D_2__Negativicutes	D_3__Selenomonadales	D_4__Veillonellaceae	D_5__Mitsuokella
denovo11828	0	0	0	0	0	0	0	0	0	0	0	1	0	0	1	0	0	0	0	0	D_0__Bacteria	D_1__Firmicutes	D_2__Clostridia	D_3__Clostridiales	D_4__Lachnospiraceae	D_5__Acetitomaculum	D_6__uncultured bacterium
denovo11927	0	0	0	0	0	0	0	0	0	0	1	1	0	0	3	10	0	0	0	0	D_0__Bacteria	D_1__Firmicutes
denovo1203	0	0	0	0	0	0	0	0	0	0	1	1	0	0	1	0	0	0	0	0	D_0__Bacteria	D_1__Firmicutes	D_2__Bacilli	D_3__Lactobacillales	D_4__Lactobacillaceae	D_5__Lactobacillus
denovo12073	0	0	0	0	0	0	0	0	0	0	0	1	0	0	0	0	0	0	0	0	D_0__Bacteria	D_1__Firmicutes	D_2__Clostridia	D_3__Clostridiales	D_4__Ruminococcaceae	D_5__Ruminococcaceae NK4A214 group	D_6__uncultured bacterium
denovo12106	0	0	0	0	0	0	0	0	0	0	1	1	0	0	0	1	0	0	0	0	D_0__Bacteria	D_1__Firmicutes	D_2__Negativicutes	D_3__Selenomonadales	D_4__Veillonellaceae	D_5__Mitsuokella
denovo12117	0	0	0	0	0	0	0	0	0	0	2	1	0	0	2	0	0	2	0	0	D_0__Bacteria	D_1__Firmicutes	D_2__Negativicutes	D_3__Selenomonadales	D_4__Veillonellaceae	D_5__Mitsuokella	D_6__uncultured bacterium
denovo12122	0	0	0	0	0	0	0	0	0	0	2	1	0	0	3	9	0	0	0	0	D_0__Bacteria	D_1__Firmicutes	D_2__Clostridia	D_3__Clostridiales	D_4__Lachnospiraceae		D_6__uncultured bacterium
denovo12157	0	0	0	0	0	0	0	1	0	0	0	1	0	0	1	3	0	1	0	0	D_0__Bacteria	D_1__Firmicutes	D_2__Negativicutes	D_3__Selenomonadales	D_4__Veillonellaceae	D_5__Mitsuokella
denovo12231	0	1	0	0	3	0	0	0	0	0	1	1	3	1	0	0	0	1	1	0	D_0__Bacteria	D_1__Firmicutes	D_2__Negativicutes	D_3__Selenomonadales	D_4__Acidaminococcaceae	D_5__Succiniclasticum	D_6__uncultured bacterium
denovo12479	0	0	0	0	0	0	0	0	0	1	1	1	0	0	0	0	0	1	1	0	D_0__Bacteria	D_1__Firmicutes	D_2__Bacilli	D_3__Lactobacillales	D_4__Lactobacillaceae	D_5__Lactobacillus	D_6__uncultured bacterium
denovo12493	0	0	0	0	0	0	0	0	0	0	0	1	1	0	0	0	0	0	0	0	D_0__Bacteria	D_1__Firmicutes	D_2__Clostridia	D_3__Clostridiales	D_4__Lachnospiraceae	D_5__Lachnospiraceae NK3A20 group	D_6__uncultured bacterium
denovo12569	0	0	0	0	0	0	0	0	0	0	1	1	0	0	0	0	0	0	0	0	D_0__Bacteria	D_1__Firmicutes	D_2__Bacilli	D_3__Lactobacillales	D_4__Lactobacillaceae	D_5__Lactobacillus	D_6__uncultured bacterium
denovo12710	0	0	0	0	0	0	0	0	0	0	0	1	0	0	0	0	0	2	1	0	D_0__Bacteria	D_1__Firmicutes	D_2__Clostridia	D_3__Clostridiales	D_4__Lachnospiraceae	D_5__[Ruminococcus] gauvreauii group	D_6__uncultured bacterium
denovo12793	0	0	0	0	0	0	3	2	0	2	2	1	0	10	12	8	0	13	1	0	D_0__Bacteria	D_1__Firmicutes	D_2__Negativicutes	D_3__Selenomonadales	D_4__Acidaminococcaceae	D_5__Acidaminococcus	D_6__uncultured bacterium
denovo1283	0	0	0	0	0	0	2	0	0	0	0	1	0	0	0	0	0	0	0	0	D_0__Bacteria	D_1__Firmicutes	D_2__Bacilli	D_3__Lactobacillales	D_4__Lactobacillaceae	D_5__Lactobacillus	D_6__uncultured bacterium
denovo12849	0	0	0	0	0	0	0	0	0	0	0	1	0	0	1	9	0	0	0	0	Unassigned
denovo12957	0	0	0	0	0	0	0	0	0	0	0	1	0	0	2	0	0	0	0	0	D_0__Bacteria	D_1__Firmicutes	D_2__Negativicutes	D_3__Selenomonadales	D_4__Veillonellaceae
denovo12969	0	0	0	0	0	0	0	0	0	0	0	1	0	0	0	0	0	0	0	0	D_0__Bacteria	D_1__Firmicutes	D_2__Negativicutes	D_3__Selenomonadales	D_4__Veillonellaceae	D_5__Mitsuokella	D_6__uncultured bacterium
denovo12990	0	0	0	0	0	0	0	0	0	1	0	1	0	0	0	0	0	0	0	0	D_0__Bacteria	D_1__Firmicutes	D_2__Negativicutes	D_3__Selenomonadales	D_4__Acidaminococcaceae	D_5__Acidaminococcus
denovo1312	0	0	0	0	0	0	1	6	0	1	1	1	0	4	0	1	0	0	0	0	D_0__Bacteria	D_1__Firmicutes	D_2__Negativicutes	D_3__Selenomonadales	D_4__Veillonellaceae	D_5__Megasphaera
denovo13123	0	0	0	0	0	0	0	0	0	0	0	1	0	0	2	2	0	0	0	0	D_0__Bacteria	D_1__Firmicutes	D_2__Negativicutes	D_3__Selenomonadales	D_4__Veillonellaceae	D_5__Mitsuokella
denovo13188	0	0	0	0	0	0	0	12	0	0	5	1	0	8	11	2	0	0	0	0	D_0__Bacteria	D_1__Firmicutes	D_2__Negativicutes	D_3__Selenomonadales	D_4__Veillonellaceae	D_5__Dialister	D_6__uncultured bacterium
denovo13260	0	0	0	0	0	0	0	1	0	0	4	1	0	3	52	75	0	1	1	0	D_0__Bacteria	D_1__Firmicutes	D_2__Negativicutes	D_3__Selenomonadales	D_4__Veillonellaceae	D_5__Dialister	D_6__uncultured bacterium
denovo13332	0	0	0	0	0	0	0	0	0	1	1	1	0	0	0	0	1	0	0	0	D_0__Bacteria	D_1__Bacteroidetes	D_2__Bacteroidia	D_3__Bacteroidales	D_4__Prevotellaceae	D_5__Prevotella 7	D_6__uncultured bacterium
denovo13475	0	0	0	0	0	0	0	0	0	0	0	1	0	0	0	1	0	0	0	0	D_0__Bacteria	D_1__Proteobacteria	D_2__Alphaproteobacteria	D_3__Rhodospirillales	D_4__Acetobacteraceae	D_5__Acetobacter	D_6__uncultured bacterium
denovo1348	0	0	1	0	0	0	0	0	0	0	0	1	0	0	0	0	1	0	0	0	D_0__Bacteria	D_1__Firmicutes	D_2__Bacilli	D_3__Lactobacillales	D_4__Lactobacillaceae	D_5__Lactobacillus
denovo13526	0	0	0	0	0	0	0	0	0	0	0	1	0	0	1	1	0	0	0	0	D_0__Bacteria	D_1__Firmicutes	D_2__Erysipelotrichia	D_3__Erysipelotrichales	D_4__Erysipelotrichaceae	D_5__Erysipelotrichaceae UCG-001	D_6__uncultured bacterium
denovo13529	0	0	0	0	0	0	0	0	0	0	2	1	0	0	0	3	0	0	0	0	D_0__Bacteria	D_1__Actinobacteria	D_2__Coriobacteriia	D_3__Coriobacteriales	D_4__Coriobacteriaceae	D_5__uncultured	D_6__uncultured bacterium
denovo13547	0	0	0	0	0	0	0	0	0	0	0	1	0	1	0	0	0	0	0	0	D_0__Bacteria	D_1__Firmicutes
denovo13612	0	0	0	0	0	0	0	0	0	3	2	1	0	3	5	0	0	5	0	0	D_0__Bacteria	D_1__Firmicutes	D_2__Negativicutes	D_3__Selenomonadales	D_4__Veillonellaceae	D_5__Mitsuokella	D_6__Lactobacillus delbrueckii subsp. bulgaricus
denovo13660	0	0	0	0	0	0	0	0	0	1	2	1	0	1	0	0	0	0	0	0	D_0__Bacteria	D_1__Firmicutes	D_2__Bacilli	D_3__Lactobacillales	D_4__Lactobacillaceae	D_5__Lactobacillus	D_6__uncultured bacterium
denovo13717	0	0	0	0	0	0	0	0	0	0	0	1	0	0	0	1	0	0	0	0	D_0__Bacteria	D_1__Firmicutes	D_2__Clostridia	D_3__Clostridiales	D_4__Family XIII	D_5__[Eubacterium] nodatum group
denovo13762	0	2	0	0	0	0	0	0	0	1	2	1	0	0	0	0	0	1	0	0	D_0__Bacteria	D_1__Firmicutes	D_2__Bacilli	D_3__Lactobacillales	D_4__Lactobacillaceae	D_5__Lactobacillus	D_6__uncultured bacterium
denovo14069	0	0	0	0	0	1	0	0	0	0	0	1	0	0	0	0	0	0	0	0	D_0__Bacteria	D_1__Firmicutes	D_2__Erysipelotrichia	D_3__Erysipelotrichales	D_4__Erysipelotrichaceae	D_5__Solobacterium	D_6__uncultured bacterium
denovo14091	0	0	0	0	0	0	0	0	0	0	3	1	0	0	1	2	0	1	0	0	D_0__Bacteria	D_1__Firmicutes	D_2__Clostridia	D_3__Clostridiales	D_4__Lachnospiraceae	D_5__[Ruminococcus] gauvreauii group
denovo14191	0	0	0	0	0	0	0	0	0	0	0	1	0	0	0	0	0	0	0	0	D_0__Bacteria	D_1__Firmicutes	D_2__Clostridia	D_3__Clostridiales	D_4__Family XIII	D_5__[Eubacterium] nodatum group
denovo14196	0	0	0	0	0	0	0	0	0	0	1	1	0	0	0	7	0	0	0	0	D_0__Bacteria	D_1__Actinobacteria	D_2__Coriobacteriia	D_3__Coriobacteriales	D_4__Coriobacteriaceae	D_5__Atopobium	D_6__uncultured bacterium
denovo14282	0	2	0	0	0	0	0	0	0	0	0	1	0	0	0	0	0	0	0	0	D_0__Bacteria	D_1__Bacteroidetes	D_2__Bacteroidia	D_3__Bacteroidales	D_4__Porphyromonadaceae	D_5__Dysgonomonas	D_6__uncultured bacterium
denovo14299	0	0	0	0	0	0	0	0	0	0	0	1	0	0	0	2	0	0	0	0	D_0__Bacteria	D_1__Firmicutes	D_2__Clostridia	D_3__Clostridiales	D_4__Eubacteriaceae	D_5__Pseudoramibacter	D_6__uncultured bacterium
denovo14335	0	0	0	0	0	0	0	0	0	0	0	1	0	0	0	1	0	0	0	0	D_0__Bacteria	D_1__Actinobacteria	D_2__Coriobacteriia	D_3__Coriobacteriales	D_4__Coriobacteriaceae	D_5__Collinsella	D_6__uncultured bacterium
denovo14434	0	0	0	0	0	0	0	0	0	1	5	1	0	0	0	0	0	0	0	0	D_0__Bacteria	D_1__Firmicutes	D_2__Clostridia	D_3__Clostridiales	D_4__Lachnospiraceae		D_6__uncultured bacterium
denovo14544	0	0	0	0	0	0	0	0	0	0	0	1	0	0	1	0	0	0	0	0	D_0__Bacteria	D_1__Firmicutes	D_2__Clostridia	D_3__Clostridiales	D_4__Lachnospiraceae	D_5__Lachnospiraceae UCG-008	D_6__uncultured bacterium
denovo14556	0	0	0	0	0	0	0	0	0	0	0	1	0	1	1	0	0	0	0	0	D_0__Bacteria	D_1__Firmicutes	D_2__Clostridia	D_3__Clostridiales	D_4__Lachnospiraceae	D_5__Butyrivibrio 2
denovo14593	0	0	0	0	0	0	0	0	0	0	0	1	0	0	2	1	0	0	0	0	D_0__Bacteria	D_1__Firmicutes	D_2__Negativicutes	D_3__Selenomonadales	D_4__Veillonellaceae	D_5__Mitsuokella	D_6__uncultured bacterium
denovo14732	0	0	0	0	0	0	0	0	0	0	1	1	0	0	0	1	0	0	0	0	Unassigned						D_6__uncultured bacterium
denovo14746	0	0	0	0	0	0	0	0	0	0	0	1	0	0	0	0	0	1	0	0	D_0__Bacteria	D_1__Actinobacteria	D_2__Actinobacteria	D_3__Actinomycetales	D_4__Actinomycetaceae	D_5__Actinomyces
denovo14755	0	0	0	0	0	0	0	0	0	0	1	1	0	0	13	56	0	0	0	0	Unassigned
denovo14779	0	0	0	0	0	0	0	0	0	1	1	1	0	4	1	3	0	0	0	0	D_0__Bacteria	D_1__Firmicutes	D_2__Negativicutes	D_3__Selenomonadales	D_4__Veillonellaceae	D_5__Megasphaera
denovo14956	0	0	0	0	0	0	0	0	0	0	0	1	0	3	0	0	0	0	0	0	Unassigned						D_6__uncultured bacterium
denovo14979	0	0	0	0	0	0	0	0	0	0	1	1	0	0	0	0	0	0	0	0	D_0__Bacteria	D_1__Firmicutes	D_2__Clostridia	D_3__Clostridiales	D_4__Lachnospiraceae	D_5__Lachnospiraceae UCG-004	D_6__uncultured bacterium
denovo15002	0	0	0	0	0	0	0	0	0	0	0	1	0	0	0	1	0	0	0	0	D_0__Bacteria	D_1__Firmicutes	D_2__Clostridia	D_3__Clostridiales	D_4__Lachnospiraceae	D_5__Coprococcus 1
denovo15040	0	0	0	0	0	0	0	0	0	0	0	1	0	0	3	1	0	0	0	0	Unassigned
denovo15075	0	0	0	0	0	0	0	1	0	0	0	1	0	1	0	0	0	0	1	4	Unassigned
denovo15106	0	0	0	0	0	0	0	0	2	0	0	1	0	0	0	0	0	0	0	0	D_0__Bacteria	D_1__Firmicutes	D_2__Clostridia	D_3__Clostridiales	D_4__Lachnospiraceae		D_6__uncultured bacterium
denovo1519	0	0	0	0	0	0	0	0	0	0	0	1	0	0	0	1	0	0	0	0	D_0__Bacteria	D_1__Firmicutes	D_2__Erysipelotrichia	D_3__Erysipelotrichales	D_4__Erysipelotrichaceae	D_5__Erysipelotrichaceae UCG-001
denovo15241	0	0	0	0	0	1	0	0	0	0	0	1	0	0	1	1	0	0	0	0	D_0__Bacteria	D_1__Firmicutes	D_2__Bacilli	D_3__Lactobacillales	D_4__Lactobacillaceae	D_5__Lactobacillus	D_6__uncultured bacterium
denovo15292	0	0	0	0	0	0	1	19	0	25	5	1	0	20	9	0	0	1	1	0	D_0__Bacteria	D_1__Firmicutes	D_2__Negativicutes	D_3__Selenomonadales	D_4__Veillonellaceae	D_5__Megasphaera
denovo15394	0	0	0	0	0	0	1	0	0	1	1	1	0	0	2	8	0	0	0	0	D_0__Bacteria	D_1__Firmicutes	D_2__Negativicutes	D_3__Selenomonadales	D_4__Veillonellaceae
denovo15395	0	0	0	0	0	0	0	0	0	0	0	1	0	0	0	1	0	0	0	0	D_0__Bacteria	D_1__Actinobacteria	D_2__Coriobacteriia	D_3__Coriobacteriales	D_4__Coriobacteriaceae	D_5__Atopobium	D_6__uncultured bacterium
denovo15407	0	0	0	0	0	0	0	0	0	1	0	1	0	1	1	1	0	0	0	0	D_0__Bacteria	D_1__Firmicutes	D_2__Bacilli	D_3__Lactobacillales	D_4__Lactobacillaceae	D_5__Lactobacillus	D_6__uncultured bacterium
denovo15429	0	0	0	0	0	0	0	0	0	0	1	1	0	0	6	8	0	1	0	0	D_0__Bacteria	D_1__Firmicutes	D_2__Negativicutes	D_3__Selenomonadales	D_4__Veillonellaceae	D_5__Mitsuokella	D_6__uncultured bacterium
denovo15519	0	0	0	0	0	0	0	0	0	0	0	1	0	0	0	0	0	0	0	0	Unassigned						D_6__uncultured bacterium
denovo15706	0	0	0	0	0	0	0	3	0	0	0	1	0	0	0	0	0	0	0	0	D_0__Bacteria	D_1__Firmicutes	D_2__Negativicutes	D_3__Selenomonadales	D_4__Veillonellaceae	D_5__Dialister	D_6__uncultured bacterium
denovo15718	0	0	0	0	0	0	0	0	0	0	0	1	0	0	0	0	0	0	0	0	D_0__Bacteria	D_1__Firmicutes	D_2__Clostridia	D_3__Clostridiales	D_4__Ruminococcaceae	D_5__Ruminococcaceae UCG-014	D_6__uncultured bacterium
denovo15779	0	0	0	0	0	0	0	4	0	1	0	1	0	1	0	0	0	1	0	0	D_0__Bacteria	D_1__Firmicutes	D_2__Bacilli	D_3__Lactobacillales	D_4__Lactobacillaceae	D_5__Lactobacillus	D_6__uncultured bacterium
denovo15878	0	0	5	5	0	4	404	260	0	0	0	1	0	0	0	0	0	1	3	4	D_0__Bacteria	D_1__Firmicutes	D_2__Bacilli	D_3__Lactobacillales	D_4__Lactobacillaceae	D_5__Lactobacillus
denovo1596	0	0	0	0	0	0	0	0	0	0	0	1	0	0	0	0	0	0	0	0	D_0__Bacteria	D_1__Firmicutes	D_2__Bacilli	D_3__Lactobacillales	D_4__Lactobacillaceae	D_5__Lactobacillus	D_6__uncultured bacterium
denovo15983	0	0	0	0	0	0	0	0	0	0	1	1	0	0	0	0	0	0	0	0	D_0__Bacteria	D_1__Firmicutes	D_2__Clostridia	D_3__Clostridiales	D_4__Lachnospiraceae	D_5__Lachnospiraceae UCG-004	D_6__uncultured bacterium
denovo16152	0	0	0	0	0	1	0	0	0	0	0	1	0	0	0	0	0	0	0	0	D_0__Bacteria	D_1__Firmicutes	D_2__Bacilli	D_3__Lactobacillales	D_4__Lactobacillaceae	D_5__Lactobacillus	D_6__uncultured bacterium
denovo16277	0	0	0	0	0	0	0	0	0	0	0	1	0	0	0	0	0	0	0	1	D_0__Bacteria	D_1__Firmicutes	D_2__Bacilli	D_3__Lactobacillales	D_4__Lactobacillaceae	D_5__Lactobacillus	D_6__Lactobacillus plantarum
denovo16285	0	0	0	0	0	0	0	0	0	1	0	1	0	0	0	0	0	0	0	0	Unassigned						D_6__uncultured bacterium
denovo16316	0	0	0	0	0	0	1	1	0	0	0	1	0	1	1	0	0	0	0	0	D_0__Bacteria	D_1__Firmicutes	D_2__Bacilli	D_3__Lactobacillales	D_4__Lactobacillaceae	D_5__Lactobacillus
denovo16322	0	0	0	0	0	0	0	0	0	0	0	1	0	1	0	0	0	0	0	0	D_0__Bacteria	D_1__Firmicutes	D_2__Bacilli	D_3__Lactobacillales			D_6__uncultured bacterium
denovo16400	0	1	0	0	0	0	3	9	0	0	3	1	0	0	1	0	0	0	0	0	Unassigned
denovo16439	0	0	0	0	0	0	0	0	0	0	0	1	0	0	0	0	0	0	0	0	Unassigned
denovo16644	0	0	0	0	0	0	0	0	0	0	0	1	0	2	1	0	0	0	0	0	D_0__Bacteria	D_1__Firmicutes	D_2__Clostridia	D_3__Clostridiales	D_4__Lachnospiraceae	D_5__[Ruminococcus] gauvreauii group	D_6__uncultured bacterium
denovo16662	0	0	0	0	1	7	2	0	0	0	0	1	0	0	0	0	0	0	0	0	D_0__Bacteria	D_1__Firmicutes	D_2__Clostridia	D_3__Clostridiales	D_4__Ruminococcaceae	D_5__Ruminococcaceae NK4A214 group
denovo16779	0	0	0	0	0	0	0	0	0	0	0	1	0	0	0	0	0	0	0	0	D_0__Bacteria	D_1__Firmicutes	D_2__Erysipelotrichia	D_3__Erysipelotrichales	D_4__Erysipelotrichaceae
denovo16924	0	0	0	0	0	0	0	0	0	0	0	1	0	1	0	0	0	0	0	0	D_0__Bacteria	D_1__Firmicutes	D_2__Negativicutes	D_3__Selenomonadales	D_4__Veillonellaceae	D_5__Megasphaera	D_6__uncultured bacterium
denovo16989	0	0	0	1	0	0	3	52	0	0	0	1	0	0	1	3	0	0	4	1	D_0__Bacteria	D_1__Firmicutes	D_2__Negativicutes	D_3__Selenomonadales	D_4__Acidaminococcaceae	D_5__Acidaminococcus
denovo170	0	1	0	0	0	0	0	0	0	0	0	1	0	0	0	0	0	0	0	0	Unassigned
denovo17046	0	0	0	0	0	0	0	0	0	0	5	1	0	1	8	0	0	3	0	0	D_0__Bacteria	D_1__Firmicutes	D_2__Negativicutes	D_3__Selenomonadales	D_4__Veillonellaceae	D_5__Mitsuokella
denovo17059	0	0	0	0	0	0	3	4	0	0	0	1	0	0	0	2	0	0	1	0	D_0__Bacteria	D_1__Firmicutes	D_2__Bacilli	D_3__Lactobacillales	D_4__Lactobacillaceae	D_5__Lactobacillus	D_6__Caldimonas hydrothermale
denovo17149	0	0	0	0	0	0	0	0	0	0	1	1	0	0	1	10	0	0	0	0	D_0__Bacteria	D_1__Firmicutes	D_2__Bacilli	D_3__Lactobacillales	D_4__Lactobacillaceae	D_5__Lactobacillus
denovo17249	0	0	0	0	0	0	0	0	0	0	1	1	0	0	0	0	0	0	0	0	D_0__Bacteria	D_1__Firmicutes	D_2__Clostridia	D_3__Clostridiales	D_4__Lachnospiraceae		D_6__uncultured bacterium
denovo17267	0	0	0	0	0	0	0	0	0	0	1	1	0	0	0	0	0	0	0	0	D_0__Bacteria	D_1__Firmicutes	D_2__Negativicutes	D_3__Selenomonadales	D_4__Veillonellaceae	D_5__Mitsuokella
denovo17295	0	0	0	0	0	0	0	0	0	2	3	1	0	0	0	0	0	1	0	0	Unassigned
denovo17351	0	0	0	0	0	0	0	0	0	0	1	1	0	1	0	0	0	0	0	0	D_0__Bacteria	D_1__Firmicutes	D_2__Clostridia	D_3__Clostridiales	D_4__Lachnospiraceae	D_5__Lachnospiraceae NK3A20 group	D_6__uncultured bacterium
denovo17495	0	0	0	0	0	0	0	0	0	0	0	1	0	0	0	0	0	0	0	0	D_0__Bacteria	D_1__Firmicutes	D_2__Clostridia	D_3__Clostridiales	D_4__Ruminococcaceae	D_5__Ruminococcaceae UCG-014
denovo17534	0	0	0	0	0	0	0	0	0	0	0	1	0	0	0	0	0	0	0	0	Unassigned						D_6__uncultured bacterium
denovo17563	0	1	0	0	0	0	0	1	0	0	0	1	0	0	0	0	0	0	0	0	D_0__Bacteria	D_1__Firmicutes	D_2__Bacilli	D_3__Lactobacillales	D_4__Lactobacillaceae	D_5__Lactobacillus	D_6__uncultured bacterium
denovo17696	0	9	8	1	0	4	0	0	0	1	1	1	0	0	0	0	0	1	0	0	D_0__Bacteria	D_1__Firmicutes	D_2__Clostridia	D_3__Clostridiales	D_4__Peptostreptococcaceae	D_5__Peptoclostridium
denovo17741	0	0	0	0	0	0	0	0	0	0	0	1	1	0	0	0	1	0	0	0	D_0__Bacteria	D_1__Proteobacteria	D_2__Betaproteobacteria	D_3__Burkholderiales	D_4__Comamonadaceae	D_5__Ramlibacter
denovo17797	0	1	0	0	0	0	0	0	0	0	0	1	0	0	0	0	0	0	0	0	D_0__Bacteria	D_1__Firmicutes	D_2__Bacilli	D_3__Lactobacillales	D_4__Lactobacillaceae	D_5__Lactobacillus
denovo17850	0	0	0	0	0	0	0	0	0	2	1	1	0	0	0	0	0	0	0	0	Unassigned						D_6__uncultured bacterium
denovo17963	0	0	0	0	0	0	0	0	0	0	0	1	0	0	1	5	0	0	0	0	Unassigned						D_6__uncultured bacterium
denovo17966	0	1	1	3	0	0	0	0	0	0	0	1	0	0	0	0	0	0	0	1	D_0__Bacteria	D_1__Firmicutes	D_2__Bacilli	D_3__Lactobacillales	D_4__Lactobacillaceae	D_5__Lactobacillus
denovo18063	0	0	0	0	0	0	0	0	0	0	0	1	0	0	3	4	0	0	0	0	D_0__Bacteria	D_1__Firmicutes	D_2__Negativicutes	D_3__Selenomonadales	D_4__Veillonellaceae	D_5__Selenomonas 1
denovo18187	0	1	15	4	0	0	0	0	0	0	0	1	0	0	0	0	0	0	0	0	D_0__Bacteria	D_1__Firmicutes	D_2__Bacilli	D_3__Lactobacillales	D_4__Lactobacillaceae	D_5__Lactobacillus
denovo18272	0	0	0	0	0	0	0	0	0	0	0	1	0	1	1	3	0	0	0	0	D_0__Bacteria	D_1__Actinobacteria	D_2__Coriobacteriia	D_3__Coriobacteriales	D_4__Coriobacteriaceae	D_5__uncultured
denovo18387	0	0	0	0	0	0	0	0	0	0	0	1	0	0	0	1	0	0	0	0	D_0__Bacteria	D_1__Firmicutes
denovo18427	0	0	5	2	0	0	0	0	0	0	1	1	0	0	0	0	0	0	0	0	D_0__Bacteria	D_1__Firmicutes	D_2__Bacilli	D_3__Lactobacillales	D_4__Lactobacillaceae	D_5__Lactobacillus	D_6__uncultured bacterium
denovo18441	0	0	0	0	0	0	1	0	0	0	0	1	0	0	0	0	0	0	1	0	D_0__Bacteria	D_1__Firmicutes	D_2__Negativicutes	D_3__Selenomonadales	D_4__Acidaminococcaceae	D_5__Acidaminococcus
denovo18547	0	0	0	0	0	0	0	2	0	0	0	1	0	0	0	0	0	0	0	0	D_0__Bacteria	D_1__Actinobacteria	D_2__Coriobacteriia	D_3__Coriobacteriales	D_4__Coriobacteriaceae		D_6__uncultured bacterium
denovo18570	0	0	0	0	0	0	0	0	0	0	0	1	0	0	0	1	0	0	0	0	D_0__Bacteria	D_1__Actinobacteria	D_2__Coriobacteriia	D_3__Coriobacteriales	D_4__Coriobacteriaceae
denovo18604	0	0	0	0	0	0	0	0	0	0	2	1	0	0	0	0	0	0	0	0	D_0__Bacteria	D_1__Firmicutes	D_2__Clostridia	D_3__Clostridiales	D_4__Ruminococcaceae	D_5__Ruminococcaceae UCG-014
denovo18660	0	0	0	0	0	0	0	0	0	0	0	1	0	0	1	1	0	0	0	0	D_0__Bacteria	D_1__Firmicutes	D_2__Bacilli	D_3__Lactobacillales	D_4__Lactobacillaceae	D_5__Lactobacillus
denovo18705	0	0	0	0	0	0	0	0	0	0	1	1	0	0	1	0	0	0	0	0	D_0__Bacteria	D_1__Firmicutes	D_2__Negativicutes	D_3__Selenomonadales	D_4__Veillonellaceae	D_5__Dialister
denovo18729	0	0	0	0	0	0	0	3	0	0	1	1	0	1	2	1	0	0	0	0	D_0__Bacteria	D_1__Firmicutes	D_2__Negativicutes	D_3__Selenomonadales	D_4__Veillonellaceae	D_5__uncultured	D_6__uncultured bacterium
denovo18821	0	0	0	0	0	0	0	0	0	0	0	1	0	1	2	1	0	0	0	0	D_0__Bacteria	D_1__Actinobacteria	D_2__Coriobacteriia	D_3__Coriobacteriales	D_4__Coriobacteriaceae	D_5__uncultured	D_6__uncultured bacterium
denovo18841	0	0	0	0	0	0	0	0	0	2	0	1	0	3	1	4	0	0	0	0	D_0__Bacteria	D_1__Firmicutes	D_2__Negativicutes	D_3__Selenomonadales	D_4__Veillonellaceae	D_5__uncultured	D_6__uncultured rumen bacterium
denovo18855	0	0	0	0	0	0	4	66	0	0	10	1	0	6	6	0	0	0	0	0	D_0__Bacteria	D_1__Firmicutes	D_2__Bacilli	D_3__Lactobacillales	D_4__Lactobacillaceae	D_5__Lactobacillus
denovo18902	0	0	0	0	0	0	0	0	0	1	4	1	0	2	13	2	0	0	1	0	D_0__Bacteria	D_1__Firmicutes	D_2__Negativicutes	D_3__Selenomonadales	D_4__Veillonellaceae	D_5__Mitsuokella	D_6__uncultured bacterium
denovo18908	0	0	0	0	0	0	0	0	0	0	0	1	0	0	2	6	0	0	1	0	D_0__Bacteria	D_1__Firmicutes	D_2__Negativicutes	D_3__Selenomonadales	D_4__Veillonellaceae	D_5__Dialister	D_6__uncultured bacterium
denovo1898	0	0	0	0	0	0	0	0	0	0	0	1	0	0	1	6	0	0	0	0	D_0__Bacteria	D_1__Firmicutes	D_2__Negativicutes	D_3__Selenomonadales	D_4__Acidaminococcaceae
denovo18992	0	0	0	0	0	0	2	13	0	5	2	1	0	12	0	9	0	10	6	0	D_0__Bacteria	D_1__Firmicutes	D_2__Negativicutes	D_3__Selenomonadales	D_4__Veillonellaceae	D_5__Megasphaera
denovo19028	0	0	0	0	4	0	0	0	0	0	0	1	0	0	0	0	0	5	4	1	D_0__Bacteria	D_1__Firmicutes	D_2__Clostridia	D_3__Clostridiales	D_4__Eubacteriaceae	D_5__Eubacterium	D_6__uncultured bacterium
denovo19050	0	0	0	0	0	0	0	5	0	0	1	1	0	0	4	1	0	0	0	0	D_0__Bacteria	D_1__Firmicutes	D_2__Negativicutes	D_3__Selenomonadales	D_4__Veillonellaceae	D_5__Mitsuokella	D_6__uncultured bacterium
denovo19128	0	0	0	0	0	0	1	1	0	0	2	1	0	1	4	8	0	0	0	0	D_0__Bacteria	D_1__Firmicutes	D_2__Negativicutes	D_3__Selenomonadales	D_4__Veillonellaceae	D_5__Megasphaera	D_6__uncultured bacterium
denovo19189	0	0	0	0	0	0	0	0	0	0	0	1	0	0	1	0	0	0	0	0	D_0__Bacteria	D_1__Actinobacteria	D_2__Coriobacteriia	D_3__Coriobacteriales	D_4__Coriobacteriaceae	D_5__uncultured
denovo193	0	0	0	0	0	0	0	0	0	1	0	1	0	0	0	0	0	0	0	0	D_0__Bacteria	D_1__Bacteroidetes	D_2__Bacteroidia	D_3__Bacteroidales	D_4__Prevotellaceae		D_6__uncultured bacterium
denovo19300	0	0	0	0	0	0	0	0	0	5	1	1	0	0	0	0	1	0	0	0	Unassigned						D_6__uncultured organism
denovo19301	0	0	0	0	0	0	0	0	0	0	2	1	0	2	0	0	0	0	0	0	D_0__Bacteria	D_1__Firmicutes	D_2__Clostridia	D_3__Clostridiales	D_4__Lachnospiraceae	D_5__Lachnospiraceae UCG-004	D_6__uncultured bacterium
denovo19398	0	0	0	0	0	0	0	0	0	0	0	1	0	0	0	2	0	0	2	0	D_0__Bacteria	D_1__Firmicutes	D_2__Negativicutes	D_3__Selenomonadales	D_4__Veillonellaceae	D_5__Dialister	D_6__uncultured bacterium
denovo19422	0	0	0	0	0	0	0	0	0	0	0	1	0	1	10	13	0	0	0	1	D_0__Bacteria	D_1__Firmicutes	D_2__Clostridia	D_3__Clostridiales	D_4__Family XIII	D_5__[Eubacterium] nodatum group
denovo19501	0	0	0	0	0	0	0	2	0	0	0	1	0	0	1	0	0	0	0	0	D_0__Bacteria	D_1__Actinobacteria	D_2__Coriobacteriia	D_3__Coriobacteriales	D_4__Coriobacteriaceae	D_5__uncultured	D_6__uncultured bacterium
denovo19530	0	0	0	0	0	0	0	0	0	0	0	1	0	1	1	0	0	0	0	0	D_0__Bacteria	D_1__Firmicutes	D_2__Negativicutes	D_3__Selenomonadales	D_4__Veillonellaceae	D_5__Dialister	D_6__uncultured bacterium
denovo19537	0	0	0	0	0	0	0	0	0	0	0	1	0	0	0	1	0	0	0	0	D_0__Bacteria	D_1__Firmicutes	D_2__Negativicutes	D_3__Selenomonadales	D_4__Veillonellaceae	D_5__Dialister	D_6__uncultured bacterium
denovo19586	0	0	0	0	0	0	1	0	0	0	1	1	0	0	1	0	0	0	0	0	D_0__Bacteria	D_1__Firmicutes	D_2__Clostridia	D_3__Clostridiales	D_4__Lachnospiraceae	D_5__[Ruminococcus] gauvreauii group
denovo19623	0	0	0	0	0	0	0	0	0	0	0	1	0	0	0	0	0	0	0	0	D_0__Bacteria	D_1__Actinobacteria	D_2__Actinobacteria	D_3__Frankiales	D_4__Geodermatophilaceae	D_5__Blastococcus
denovo1965	0	0	0	0	0	0	0	0	0	0	0	1	0	0	2	0	0	0	0	0	Unassigned
denovo19724	0	0	0	0	0	0	0	0	0	0	0	1	0	0	0	0	0	0	0	0	D_0__Bacteria	D_1__Firmicutes	D_2__Negativicutes	D_3__Selenomonadales	D_4__Veillonellaceae	D_5__Dialister
denovo1978	0	0	0	0	0	0	0	2	0	1	9	1	0	1	5	2	0	2	1	0	D_0__Bacteria	D_1__Firmicutes	D_2__Negativicutes	D_3__Selenomonadales	D_4__Veillonellaceae	D_5__Mitsuokella
denovo19783	0	0	0	0	0	0	0	0	0	0	0	1	0	0	0	2	0	0	0	0	D_0__Bacteria	D_1__Firmicutes	D_2__Negativicutes	D_3__Selenomonadales	D_4__Veillonellaceae		D_6__uncultured bacterium
denovo19937	0	0	0	0	0	0	0	1	0	0	0	1	0	0	0	2	0	0	0	0	D_0__Bacteria	D_1__Firmicutes	D_2__Bacilli	D_3__Lactobacillales	D_4__Lactobacillaceae	D_5__Lactobacillus	D_6__uncultured bacterium
denovo19976	0	0	0	0	0	0	0	0	0	0	0	1	0	0	0	1	0	0	0	0	Unassigned						D_6__uncultured bacterium
denovo19988	0	0	0	0	0	0	19	51	0	0	4	1	0	8	11	17	0	0	1	0	D_0__Bacteria	D_1__Firmicutes	D_2__Negativicutes	D_3__Selenomonadales	D_4__Acidaminococcaceae	D_5__Acidaminococcus	D_6__uncultured rumen bacterium
denovo20032	0	1	1	2	0	0	1	0	0	0	1	1	0	0	0	0	0	0	0	2	D_0__Bacteria	D_1__Firmicutes	D_2__Bacilli	D_3__Lactobacillales	D_4__Lactobacillaceae	D_5__Lactobacillus
denovo20073	0	0	0	0	0	0	2	12	0	0	10	1	0	30	49	50	0	0	1	0	D_0__Bacteria	D_1__Firmicutes	D_2__Negativicutes	D_3__Selenomonadales	D_4__Veillonellaceae	D_5__Dialister
denovo2011	0	0	0	0	0	0	0	0	0	0	0	1	0	1	0	0	0	0	0	0	D_0__Bacteria	D_1__Firmicutes	D_2__Negativicutes	D_3__Selenomonadales	D_4__Veillonellaceae	D_5__Megasphaera
denovo20114	0	0	0	0	0	0	0	0	0	0	0	1	0	0	0	0	0	0	0	0	D_0__Bacteria	D_1__Actinobacteria	D_2__Coriobacteriia	D_3__Coriobacteriales	D_4__Coriobacteriaceae	D_5__Olsenella
denovo20237	0	0	0	0	0	0	0	0	0	1	0	1	0	0	0	0	0	0	0	0	D_0__Bacteria	D_1__Firmicutes	D_2__Negativicutes	D_3__Selenomonadales	D_4__Veillonellaceae	D_5__Mitsuokella
denovo20289	0	0	0	0	0	0	1	0	0	0	0	1	0	3	4	0	0	1	1	0	D_0__Bacteria	D_1__Firmicutes	D_2__Erysipelotrichia	D_3__Erysipelotrichales	D_4__Erysipelotrichaceae	D_5__Erysipelotrichaceae UCG-006	D_6__uncultured bacterium
denovo20351	0	0	0	0	0	0	0	0	0	0	0	1	0	0	1	3	0	1	0	0	D_0__Bacteria	D_1__Firmicutes	D_2__Negativicutes	D_3__Selenomonadales	D_4__Veillonellaceae	D_5__Mitsuokella	D_6__uncultured bacterium
denovo20357	0	0	0	0	0	0	1	10	0	3	3	1	0	3	7	3	0	2	0	0	D_0__Bacteria	D_1__Firmicutes	D_2__Negativicutes	D_3__Selenomonadales	D_4__Veillonellaceae	D_5__Megasphaera	D_6__uncultured bacterium
denovo20380	0	0	0	0	0	0	0	0	0	0	0	1	0	0	0	0	0	0	0	0	D_0__Bacteria	D_1__Firmicutes	D_2__Bacilli	D_3__Lactobacillales	D_4__Lactobacillaceae	D_5__Lactobacillus	D_6__uncultured rumen bacterium
denovo20385	0	0	0	0	0	0	0	0	0	0	0	1	0	0	1	7	0	0	0	0	D_0__Bacteria	D_1__Firmicutes	D_2__Negativicutes	D_3__Selenomonadales	D_4__Veillonellaceae	D_5__Mitsuokella
denovo20434	0	0	0	0	0	0	0	0	0	0	2	1	0	0	3	9	0	0	0	0	D_0__Bacteria	D_1__Firmicutes	D_2__Negativicutes	D_3__Selenomonadales	D_4__Veillonellaceae	D_5__Megasphaera
denovo20477	0	0	0	0	0	0	0	0	0	0	0	1	3	0	0	0	1	2	0	0	D_0__Bacteria	D_1__Bacteroidetes	D_2__Cytophagia	D_3__Order III	D_4__Unknown Family	D_5__Balneola
denovo2050	0	0	0	0	0	0	0	0	0	0	0	1	0	0	1	1	0	0	0	0	D_0__Bacteria	D_1__Firmicutes	D_2__Clostridia	D_3__Clostridiales	D_4__Lachnospiraceae	D_5__Lachnospiraceae UCG-004
denovo20525	0	0	0	0	1	0	0	0	1	0	0	1	1	0	0	0	0	0	0	0	D_0__Bacteria	D_1__Chlamydiae	D_2__Chlamydiae	D_3__Chlamydiales	D_4__Parachlamydiaceae	D_5__Neochlamydia
denovo20572	0	0	0	0	0	0	0	0	0	0	0	1	0	0	0	0	0	0	0	2	D_0__Bacteria	D_1__Firmicutes	D_2__Bacilli	D_3__Lactobacillales	D_4__Lactobacillaceae	D_5__Lactobacillus
denovo20761	0	0	0	0	0	0	4	1	0	1	8	1	0	12	13	4	0	4	0	0	D_0__Bacteria	D_1__Firmicutes	D_2__Clostridia	D_3__Clostridiales	D_4__Lachnospiraceae	D_5__uncultured	D_6__uncultured bacterium
denovo20786	0	0	0	0	0	0	0	1	0	0	0	1	0	0	0	0	0	0	0	0	D_0__Bacteria	D_1__Firmicutes	D_2__Negativicutes	D_3__Selenomonadales	D_4__Veillonellaceae	D_5__Mitsuokella
denovo20819	0	0	0	0	0	0	0	0	0	0	1	1	0	0	0	2	0	0	0	0	D_0__Bacteria	D_1__Firmicutes	D_2__Negativicutes	D_3__Selenomonadales	D_4__Veillonellaceae	D_5__Dialister	D_6__uncultured bacterium
denovo21134	0	0	0	0	0	0	44	9	0	0	0	1	0	1	2	0	0	3	3	3	D_0__Bacteria	D_1__Firmicutes	D_2__Negativicutes	D_3__Selenomonadales	D_4__Veillonellaceae	D_5__Megasphaera
denovo21227	0	0	0	0	0	0	0	0	0	0	1	1	0	0	0	0	0	0	0	0	D_0__Bacteria	D_1__Firmicutes	D_2__Clostridia	D_3__Clostridiales	D_4__Lachnospiraceae
denovo21340	0	0	0	0	0	0	0	0	0	0	0	1	0	0	1	4	0	0	0	0	D_0__Bacteria	D_1__Actinobacteria	D_2__Coriobacteriia	D_3__Coriobacteriales	D_4__Coriobacteriaceae	D_5__Olsenella	D_6__uncultured bacterium
denovo21448	0	0	0	0	0	0	0	0	0	0	0	1	0	0	0	0	0	0	0	0	Unassigned						D_6__uncultured bacterium
denovo21475	0	1	0	0	0	0	0	2	0	0	0	1	0	0	0	0	0	0	0	0	D_0__Bacteria	D_1__Firmicutes	D_2__Bacilli	D_3__Lactobacillales	D_4__Lactobacillaceae	D_5__Lactobacillus
denovo21513	0	0	0	0	0	1	0	0	0	0	1	1	0	0	0	0	0	0	0	0	D_0__Bacteria	D_1__Firmicutes	D_2__Bacilli	D_3__Lactobacillales	D_4__Lactobacillaceae	D_5__Lactobacillus	D_6__uncultured bacterium
denovo21538	0	0	0	0	0	0	0	0	0	0	0	1	0	0	0	0	0	0	0	0	D_0__Bacteria	D_1__Actinobacteria	D_2__Coriobacteriia	D_3__Coriobacteriales	D_4__Coriobacteriaceae	D_5__Olsenella
denovo21554	0	0	0	0	0	0	0	0	0	0	0	1	0	0	1	0	0	0	0	1	D_0__Bacteria	D_1__Firmicutes	D_2__Erysipelotrichia	D_3__Erysipelotrichales	D_4__Erysipelotrichaceae	D_5__Catenibacterium	D_6__uncultured bacterium
denovo2157	0	0	0	0	0	0	0	0	0	0	1	1	0	0	5	0	0	0	0	0	D_0__Bacteria	D_1__Firmicutes	D_2__Clostridia	D_3__Clostridiales	D_4__Lachnospiraceae	D_5__Syntrophococcus	D_6__uncultured bacterium
denovo21663	0	0	0	0	0	0	0	0	0	0	0	1	0	0	0	0	0	0	0	0	D_0__Bacteria	D_1__Firmicutes	D_2__Clostridia	D_3__Clostridiales	D_4__Lachnospiraceae	D_5__Syntrophococcus
denovo21665	0	1	0	0	0	0	0	0	1	0	0	1	0	0	0	0	0	0	0	0	D_0__Bacteria	D_1__Proteobacteria	D_2__Alphaproteobacteria	D_3__Sphingomonadales	D_4__Erythrobacteraceae	D_5__Altererythrobacter
denovo21684	0	0	0	0	0	0	0	0	0	0	0	1	0	0	0	1	0	0	0	0	D_0__Bacteria	D_1__Firmicutes	D_2__Clostridia	D_3__Clostridiales	D_4__Lachnospiraceae	D_5__[Ruminococcus] gauvreauii group
denovo2169	0	0	0	0	0	0	0	1	0	0	0	1	0	0	0	0	0	0	0	0	D_0__Bacteria	D_1__Firmicutes	D_2__Negativicutes	D_3__Selenomonadales	D_4__Veillonellaceae	D_5__Mitsuokella	D_6__uncultured bacterium
denovo21764	0	0	0	0	0	0	0	0	0	0	0	1	0	0	0	0	0	0	0	0	D_0__Bacteria	D_1__Firmicutes	D_2__Erysipelotrichia	D_3__Erysipelotrichales	D_4__Erysipelotrichaceae	D_5__Erysipelotrichaceae UCG-006	D_6__uncultured bacterium
denovo21809	0	0	0	0	0	0	0	0	0	0	3	1	0	0	0	1	0	0	1	0	D_0__Bacteria	D_1__Firmicutes	D_2__Clostridia	D_3__Clostridiales	D_4__Lachnospiraceae	D_5__[Ruminococcus] gauvreauii group
denovo21847	0	0	0	0	0	0	0	0	0	0	0	1	0	0	2	4	0	0	0	0	D_0__Bacteria	D_1__Firmicutes	D_2__Erysipelotrichia	D_3__Erysipelotrichales	D_4__Erysipelotrichaceae	D_5__Erysipelotrichaceae UCG-001	D_6__uncultured bacterium
denovo21890	0	0	0	0	0	0	0	0	0	0	0	1	0	0	0	0	0	0	0	0	D_0__Bacteria	D_1__Firmicutes	D_2__Negativicutes	D_3__Selenomonadales	D_4__Acidaminococcaceae	D_5__Acidaminococcus	D_6__uncultured gamma proteobacterium
denovo21911	0	0	0	0	0	0	0	0	0	0	1	1	0	0	0	0	0	0	0	0	Unassigned
denovo21919	0	0	0	0	0	0	0	0	0	0	0	1	0	4	5	1	0	2	0	0	D_0__Bacteria	D_1__Firmicutes	D_2__Clostridia	D_3__Clostridiales	D_4__Ruminococcaceae	D_5__Ruminococcaceae UCG-005	D_6__uncultured bacterium
denovo21948	0	0	0	0	0	0	0	0	0	1	0	1	0	4	1	0	0	1	0	0	D_0__Bacteria	D_1__Firmicutes	D_2__Erysipelotrichia	D_3__Erysipelotrichales	D_4__Erysipelotrichaceae	D_5__Erysipelotrichaceae UCG-006
denovo21999	0	0	0	0	0	0	0	0	0	0	0	1	0	0	1	1	0	0	0	0	Unassigned						D_6__uncultured bacterium
denovo22005	0	0	0	0	0	0	0	0	0	0	1	1	0	2	0	0	0	0	0	0	D_0__Bacteria	D_1__Firmicutes	D_2__Clostridia	D_3__Clostridiales	D_4__Lachnospiraceae	D_5__[Ruminococcus] gauvreauii group	D_6__uncultured bacterium
denovo2212	0	0	0	0	0	0	0	0	0	0	1	1	0	0	0	0	0	0	0	0	D_0__Bacteria	D_1__Firmicutes
denovo22124	0	0	0	0	0	0	0	0	0	0	0	1	0	0	1	2	0	0	1	0	D_0__Bacteria	D_1__Actinobacteria	D_2__Actinobacteria	D_3__Bifidobacteriales	D_4__Bifidobacteriaceae
denovo22161	0	0	0	0	0	0	0	0	0	0	1	1	0	0	2	0	0	0	0	0	D_0__Bacteria	D_1__Firmicutes	D_2__Negativicutes	D_3__Selenomonadales	D_4__Veillonellaceae	D_5__Dialister	D_6__uncultured bacterium
denovo22211	0	0	0	0	0	0	0	0	0	0	1	1	0	0	2	17	0	0	0	0	Unassigned						D_6__uncultured bacterium
denovo22329	0	0	0	0	0	0	12	5	0	0	0	1	0	0	0	1	0	0	0	0	D_0__Bacteria	D_1__Firmicutes	D_2__Bacilli	D_3__Lactobacillales	D_4__Lactobacillaceae	D_5__Lactobacillus
denovo22368	0	1	0	0	0	0	0	0	0	2	0	1	0	0	1	0	0	1	1	7	D_0__Bacteria	D_1__Firmicutes	D_2__Bacilli	D_3__Lactobacillales	D_4__Lactobacillaceae	D_5__Lactobacillus
denovo22413	0	0	0	0	0	0	0	0	0	0	1	1	0	0	0	0	0	0	0	0	D_0__Bacteria	D_1__Firmicutes	D_2__Clostridia	D_3__Clostridiales	D_4__Lachnospiraceae	D_5__Lachnospiraceae UCG-004
denovo22421	0	0	0	0	0	0	0	5	0	2	1	1	0	4	7	0	0	1	1	0	D_0__Bacteria	D_1__Firmicutes	D_2__Negativicutes	D_3__Selenomonadales	D_4__Veillonellaceae	D_5__Mitsuokella	D_6__uncultured bacterium
denovo22431	0	0	0	0	0	0	0	0	0	0	0	1	0	0	0	0	0	0	0	0	D_0__Bacteria	D_1__Firmicutes	D_2__Erysipelotrichia	D_3__Erysipelotrichales	D_4__Erysipelotrichaceae	D_5__Erysipelotrichaceae UCG-001	D_6__uncultured bacterium
denovo22476	0	0	0	0	2	1	0	0	0	0	0	1	0	0	0	0	0	0	0	0	D_0__Bacteria	D_1__Firmicutes	D_2__Negativicutes	D_3__Selenomonadales	D_4__Acidaminococcaceae	D_5__Succiniclasticum	D_6__uncultured bacterium
denovo2302	0	0	0	0	0	0	0	0	0	1	2	1	0	3	0	0	0	0	0	0	D_0__Bacteria	D_1__Bacteroidetes	D_2__Bacteroidia	D_3__Bacteroidales	D_4__Prevotellaceae
denovo2320	0	0	0	0	0	0	0	0	0	0	1	1	0	0	0	0	0	0	0	0	D_0__Bacteria	D_1__Firmicutes	D_2__Clostridia	D_3__Clostridiales	D_4__Ruminococcaceae	D_5__Ruminococcaceae UCG-014	D_6__uncultured bacterium
denovo2445	0	0	0	0	0	0	0	0	0	0	0	1	0	0	3	22	0	0	0	0	D_0__Bacteria	D_1__Actinobacteria	D_2__Coriobacteriia	D_3__Coriobacteriales	D_4__Coriobacteriaceae	D_5__Atopobium
denovo2472	0	0	0	0	0	0	0	8	0	6	0	1	0	0	0	1	0	0	1	0	D_0__Bacteria	D_1__Firmicutes	D_2__Negativicutes	D_3__Selenomonadales	D_4__Veillonellaceae	D_5__Megasphaera
denovo2504	0	0	0	0	0	0	0	0	0	0	2	1	0	0	0	0	0	0	0	0	Unassigned						D_6__uncultured bacterium
denovo2537	0	0	0	0	0	0	0	0	0	0	0	1	0	0	2	1	0	0	0	0	D_0__Bacteria	D_1__Firmicutes	D_2__Negativicutes	D_3__Selenomonadales	D_4__Veillonellaceae	D_5__Mitsuokella	D_6__uncultured bacterium
denovo2641	0	0	0	0	0	0	0	0	0	0	0	1	0	0	0	0	0	0	0	0	D_0__Bacteria	D_1__Firmicutes	D_2__Bacilli	D_3__Lactobacillales	D_4__Lactobacillaceae	D_5__Lactobacillus
denovo2658	0	0	0	0	0	0	0	0	0	0	0	1	0	0	0	0	0	0	0	0	D_0__Bacteria	D_1__Firmicutes	D_2__Negativicutes	D_3__Selenomonadales	D_4__Veillonellaceae	D_5__Mitsuokella
denovo2699	0	0	0	0	0	0	0	0	0	0	0	1	0	0	1	0	0	0	0	0	D_0__Bacteria	D_1__Firmicutes	D_2__Negativicutes	D_3__Selenomonadales	D_4__Veillonellaceae	D_5__Mitsuokella	D_6__uncultured bacterium
denovo2711	0	0	0	0	0	0	0	0	0	0	0	1	0	1	3	0	0	0	0	0	D_0__Bacteria	D_1__Firmicutes	D_2__Clostridia	D_3__Clostridiales	D_4__Lachnospiraceae	D_5__[Ruminococcus] gauvreauii group	D_6__uncultured rumen bacterium
denovo2735	0	0	0	0	0	0	0	0	0	0	0	1	0	0	0	0	0	0	1	0	D_0__Bacteria	D_1__Firmicutes	D_2__Bacilli	D_3__Lactobacillales	D_4__Lactobacillaceae	D_5__Lactobacillus
denovo2916	0	0	0	0	0	0	0	0	0	0	1	1	0	0	0	1	0	0	0	0	D_0__Bacteria	D_1__Firmicutes	D_2__Clostridia	D_3__Clostridiales	D_4__Lachnospiraceae	D_5__[Ruminococcus] gauvreauii group	D_6__uncultured bacterium
denovo2966	0	0	0	0	0	0	0	0	0	0	0	1	0	0	0	0	0	0	0	4	D_0__Bacteria	D_1__Firmicutes	D_2__Bacilli	D_3__Bacillales	D_4__Planococcaceae	D_5__Lysinibacillus
denovo3002	0	0	0	0	0	0	0	0	0	0	0	1	0	0	0	0	0	0	0	0	Unassigned						D_6__uncultured bacterium
denovo3018	0	0	0	0	0	0	0	0	0	0	0	1	0	0	3	6	0	0	0	0	Unassigned						D_6__uncultured bacterium
denovo3110	0	0	0	0	0	0	0	0	0	0	0	1	0	0	0	0	0	0	0	0	Unassigned						D_6__uncultured bacterium
denovo3128	0	0	0	0	0	0	0	0	0	0	0	1	0	2	2	0	0	0	0	0	D_0__Bacteria	D_1__Firmicutes	D_2__Clostridia	D_3__Clostridiales	D_4__Lachnospiraceae	D_5__Lachnoclostridium	D_6__uncultured bacterium
denovo3211	0	0	0	0	0	0	0	0	0	0	0	1	0	0	1	0	0	4	0	0	D_0__Bacteria	D_1__Firmicutes	D_2__Negativicutes	D_3__Selenomonadales	D_4__Veillonellaceae	D_5__Mitsuokella	D_6__uncultured bacterium
denovo3242	0	0	0	0	0	0	0	0	0	0	0	1	0	0	0	0	0	0	0	0	Unassigned						D_6__uncultured bacterium
denovo3368	0	0	0	0	0	0	0	0	0	0	0	1	0	1	1	0	0	0	0	1	D_0__Bacteria	D_1__Firmicutes	D_2__Clostridia	D_3__Clostridiales	D_4__Family XIII	D_5__[Eubacterium] nodatum group
denovo3393	0	0	0	0	0	0	0	0	0	0	0	1	0	0	0	0	0	0	0	0	D_0__Bacteria	D_1__Firmicutes	D_2__Negativicutes	D_3__Selenomonadales	D_4__Veillonellaceae	D_5__Mitsuokella	D_6__uncultured bacterium
denovo3394	0	0	0	0	0	0	0	0	0	0	1	1	0	0	0	0	0	0	0	0	D_0__Bacteria	D_1__Firmicutes	D_2__Erysipelotrichia	D_3__Erysipelotrichales	D_4__Erysipelotrichaceae	D_5__Erysipelotrichaceae UCG-006
denovo345	0	0	0	0	0	0	0	0	0	0	1	1	0	0	0	0	0	0	0	0	D_0__Bacteria	D_1__Firmicutes	D_2__Clostridia	D_3__Clostridiales	D_4__Lachnospiraceae
denovo3497	0	0	0	0	0	0	0	0	0	1	3	1	0	0	1	0	0	0	0	0	D_0__Bacteria	D_1__Firmicutes	D_2__Negativicutes	D_3__Selenomonadales	D_4__Veillonellaceae	D_5__Mitsuokella	D_6__uncultured rumen bacterium
denovo3601	0	0	0	0	0	0	0	0	0	0	2	1	0	0	1	0	0	0	0	0	D_0__Bacteria	D_1__Firmicutes	D_2__Negativicutes	D_3__Selenomonadales	D_4__Veillonellaceae	D_5__Mitsuokella	D_6__uncultured bacterium
denovo3672	0	0	0	0	0	0	0	0	0	0	0	1	0	0	0	1	0	0	0	0	D_0__Bacteria	D_1__Firmicutes	D_2__Negativicutes	D_3__Selenomonadales	D_4__Veillonellaceae	D_5__Dialister	D_6__uncultured rumen bacterium
denovo3738	0	0	0	0	0	0	0	1	0	0	0	1	0	0	0	0	0	0	0	0	D_0__Bacteria	D_1__Firmicutes	D_2__Bacilli	D_3__Lactobacillales	D_4__Lactobacillaceae	D_5__Lactobacillus	D_6__uncultured bacterium
denovo379	0	0	0	0	0	0	0	0	0	0	1	1	0	0	12	53	0	0	0	0	Unassigned
denovo388	0	0	0	0	0	0	0	0	0	0	0	1	0	1	0	0	0	0	0	0	D_0__Bacteria	D_1__Firmicutes	D_2__Negativicutes	D_3__Selenomonadales	D_4__Acidaminococcaceae		D_6__uncultured bacterium
denovo3917	0	0	0	0	0	0	0	0	0	0	0	1	0	0	2	9	0	0	0	0	D_0__Bacteria	D_1__Firmicutes	D_2__Negativicutes	D_3__Selenomonadales	D_4__Veillonellaceae	D_5__Mitsuokella	D_6__uncultured bacterium
denovo3934	0	0	0	0	0	0	0	0	0	0	1	1	0	1	0	0	0	0	0	0	Unassigned
denovo3977	0	0	0	0	0	0	0	0	0	0	0	1	0	0	3	2	0	0	0	0	D_0__Bacteria	D_1__Firmicutes	D_2__Negativicutes	D_3__Selenomonadales	D_4__Veillonellaceae	D_5__Megasphaera	D_6__uncultured organism
denovo4072	0	0	0	0	0	0	0	0	0	0	0	1	0	0	2	0	0	0	0	0	D_0__Bacteria	D_1__Firmicutes	D_2__Erysipelotrichia	D_3__Erysipelotrichales	D_4__Erysipelotrichaceae	D_5__Solobacterium
denovo4100	0	0	0	0	0	0	0	0	0	0	0	1	0	1	1	0	0	1	0	0	D_0__Bacteria	D_1__Firmicutes	D_2__Clostridia	D_3__Clostridiales	D_4__Lachnospiraceae	D_5__Lachnospiraceae NK4A136 group
denovo4110	0	0	0	0	0	0	0	0	0	23	4	1	0	0	0	0	0	63	23	0	D_0__Bacteria	D_1__Firmicutes	D_2__Clostridia	D_3__Clostridiales	D_4__Lachnospiraceae	D_5__Oribacterium	D_6__uncultured bacterium
denovo424	0	0	0	0	0	0	0	0	0	0	2	1	0	0	0	2	0	0	1	0	D_0__Bacteria	D_1__Firmicutes	D_2__Bacilli	D_3__Lactobacillales	D_4__Lactobacillaceae	D_5__Lactobacillus
denovo4257	0	0	0	0	0	0	0	0	0	1	2	1	0	1	8	15	0	0	1	0	D_0__Bacteria	D_1__Firmicutes	D_2__Negativicutes	D_3__Selenomonadales	D_4__Veillonellaceae	D_5__Mitsuokella
denovo4343	0	0	0	0	0	0	0	0	0	0	1	1	0	0	3	17	0	0	0	0	D_0__Bacteria	D_1__Firmicutes	D_2__Negativicutes	D_3__Selenomonadales	D_4__Veillonellaceae	D_5__uncultured	D_6__uncultured bacterium
denovo4369	0	0	0	0	0	0	0	0	0	0	0	1	0	0	0	2	0	0	0	0	D_0__Bacteria	D_1__Proteobacteria	D_2__Alphaproteobacteria	D_3__Rhodospirillales	D_4__Acetobacteraceae	D_5__Acetobacter	D_6__uncultured bacterium
denovo440	0	0	0	0	0	0	0	0	0	0	1	1	0	0	0	0	0	0	0	0	D_0__Bacteria	D_1__Firmicutes	D_2__Clostridia	D_3__Clostridiales	D_4__Lachnospiraceae		D_6__uncultured bacterium
denovo453	0	0	0	0	0	0	0	0	0	0	1	1	0	0	1	2	0	2	0	1	D_0__Bacteria	D_1__Firmicutes	D_2__Negativicutes	D_3__Selenomonadales	D_4__Veillonellaceae	D_5__Dialister	D_6__uncultured bacterium
denovo4561	0	0	0	0	0	0	0	0	0	0	0	1	0	0	1	0	0	0	0	0	D_0__Bacteria	D_1__Firmicutes	D_2__Clostridia	D_3__Clostridiales	D_4__Lachnospiraceae		D_6__uncultured bacterium
denovo4678	0	0	0	0	0	0	0	0	0	0	1	1	0	0	0	0	0	0	0	0	Unassigned
denovo4700	0	0	0	0	0	0	0	0	0	0	0	1	0	0	1	0	0	0	0	0	D_0__Bacteria	D_1__Actinobacteria	D_2__Actinobacteria	D_3__Bifidobacteriales	D_4__Bifidobacteriaceae	D_5__Bifidobacterium	D_6__uncultured bacterium
denovo4743	0	0	0	0	0	0	0	17	0	0	1	1	0	1	2	0	0	0	0	0	D_0__Bacteria	D_1__Firmicutes	D_2__Negativicutes	D_3__Selenomonadales	D_4__Veillonellaceae	D_5__Megasphaera	D_6__uncultured bacterium
denovo4810	0	0	0	0	0	0	0	0	0	0	0	1	0	0	1	5	0	0	0	0	D_0__Bacteria	D_1__Firmicutes	D_2__Negativicutes	D_3__Selenomonadales	D_4__Veillonellaceae	D_5__Mitsuokella	D_6__uncultured bacterium
denovo4851	0	0	0	0	0	0	0	0	0	1	0	1	0	0	0	0	0	0	0	0	Unassigned						D_6__uncultured bacterium
denovo4894	0	0	0	0	0	0	0	1	0	0	0	1	0	0	0	0	0	0	0	0	Unassigned						D_6__uncultured bacterium
denovo4930	0	0	0	0	0	0	0	0	0	0	0	1	0	0	0	1	0	0	0	0	Unassigned
denovo505	0	1	1	0	0	0	0	0	0	3	0	1	0	0	0	0	0	0	0	0	Unassigned						D_6__uncultured bacterium
denovo5077	0	0	0	0	0	0	0	0	0	0	0	1	0	0	0	0	0	0	0	0	D_0__Bacteria	D_1__Firmicutes	D_2__Clostridia	D_3__Clostridiales	D_4__Lachnospiraceae	D_5__Acetitomaculum
denovo5143	0	0	0	0	0	0	0	0	0	1	6	1	0	0	2	0	0	0	0	0	Unassigned						D_6__uncultured rumen bacterium
denovo5145	0	0	0	0	0	0	0	0	0	0	0	1	0	0	0	0	0	0	0	0	D_0__Bacteria	D_1__Firmicutes	D_2__Negativicutes	D_3__Selenomonadales	D_4__Veillonellaceae	D_5__Megasphaera	D_6__uncultured bacterium
denovo5147	0	0	0	0	0	0	0	0	0	0	0	1	0	0	1	2	0	0	0	0	D_0__Bacteria	D_1__Firmicutes	D_2__Negativicutes	D_3__Selenomonadales	D_4__Veillonellaceae	D_5__Mitsuokella
denovo5188	0	0	0	0	0	0	0	0	0	1	0	1	0	0	0	0	0	0	0	0	Unassigned
denovo5216	0	0	0	0	0	0	0	0	0	7	12	1	0	3	14	0	0	12	1	0	D_0__Bacteria	D_1__Firmicutes	D_2__Negativicutes	D_3__Selenomonadales	D_4__Veillonellaceae	D_5__Mitsuokella	D_6__uncultured bacterium
denovo5293	0	0	1	0	0	0	0	1	0	0	2	1	0	0	0	0	0	0	0	0	D_0__Bacteria	D_1__Proteobacteria	D_2__Betaproteobacteria	D_3__Burkholderiales	D_4__Burkholderiaceae	D_5__Limnobacter	D_6__uncultured bacterium
denovo5372	0	0	0	0	0	0	0	0	0	0	0	1	0	0	2	0	0	0	0	0	Unassigned						D_6__uncultured bacterium
denovo54	0	0	0	0	0	0	1	6	0	2	1	1	0	0	0	7	0	0	0	0	D_0__Bacteria	D_1__Firmicutes	D_2__Negativicutes	D_3__Selenomonadales	D_4__Veillonellaceae	D_5__Mitsuokella	D_6__uncultured bacterium
denovo5594	0	0	0	0	0	0	0	0	0	1	0	1	0	0	1	0	0	2	0	0	D_0__Bacteria	D_1__Actinobacteria	D_2__Coriobacteriia	D_3__Coriobacteriales	D_4__Coriobacteriaceae	D_5__uncultured
denovo5643	0	0	0	0	0	0	3	4	0	1	2	1	0	1	4	1	0	0	0	0	D_0__Bacteria	D_1__Firmicutes	D_2__Bacilli	D_3__Lactobacillales	D_4__Lactobacillaceae	D_5__Lactobacillus
denovo568	0	0	0	0	0	0	0	0	0	0	0	1	0	0	0	0	0	0	0	1	D_0__Bacteria	D_1__Firmicutes	D_2__Clostridia	D_3__Clostridiales	D_4__Lachnospiraceae	D_5__Blautia	D_6__uncultured bacterium
denovo5759	0	0	0	0	0	0	0	0	0	0	0	1	0	0	0	2	0	0	0	0	Unassigned						D_6__uncultured bacterium
denovo5781	0	0	0	0	0	0	0	13	0	1	6	1	0	7	34	1	0	5	0	0	D_0__Bacteria	D_1__Firmicutes	D_2__Negativicutes	D_3__Selenomonadales	D_4__Veillonellaceae		D_6__uncultured bacterium
denovo5960	0	0	0	0	0	0	0	0	0	0	0	1	0	0	1	0	0	3	0	0	D_0__Bacteria	D_1__Firmicutes	D_2__Negativicutes	D_3__Selenomonadales	D_4__Veillonellaceae	D_5__Mitsuokella
denovo5961	0	0	0	0	0	0	0	4	0	0	0	1	0	0	0	0	0	0	0	0	Unassigned						D_6__uncultured bacterium
denovo5985	0	0	0	0	0	0	0	0	0	0	2	1	0	1	2	0	0	0	0	0	D_0__Bacteria	D_1__Firmicutes	D_2__Clostridia	D_3__Clostridiales	D_4__Lachnospiraceae	D_5__Lachnospiraceae NK3A20 group
denovo609	0	1	0	0	0	0	2	1	0	0	0	1	0	0	0	1	0	0	0	0	D_0__Bacteria	D_1__Firmicutes	D_2__Bacilli	D_3__Lactobacillales	D_4__Lactobacillaceae	D_5__Lactobacillus
denovo6158	0	3	0	0	0	0	0	0	0	0	0	1	0	0	0	0	0	0	0	0	D_0__Bacteria	D_1__Firmicutes	D_2__Bacilli	D_3__Lactobacillales	D_4__Lactobacillaceae	D_5__Lactobacillus	D_6__uncultured bacterium
denovo6160	0	0	0	0	0	0	0	0	0	4	1	1	0	2	0	0	1	0	0	0	Unassigned
denovo6169	0	0	0	0	0	0	0	0	0	0	0	1	0	0	0	1	0	0	0	0	D_0__Bacteria	D_1__Firmicutes	D_2__Clostridia	D_3__Clostridiales	D_4__Lachnospiraceae
denovo6293	0	0	0	0	0	0	0	0	0	0	0	1	0	0	0	0	0	0	0	0	D_0__Bacteria	D_1__Firmicutes	D_2__Bacilli	D_3__Lactobacillales	D_4__Lactobacillaceae	D_5__Lactobacillus	D_6__uncultured bacterium
denovo636	0	0	0	0	0	0	0	0	0	0	1	1	0	0	1	0	0	0	0	0	Unassigned						D_6__uncultured bacterium
denovo6405	0	0	0	0	0	0	0	0	0	0	3	1	0	2	5	0	0	0	0	0	D_0__Bacteria	D_1__Firmicutes	D_2__Negativicutes	D_3__Selenomonadales	D_4__Veillonellaceae	D_5__Megasphaera
denovo6455	0	0	0	0	0	0	0	0	0	0	5	1	0	0	0	0	0	0	0	0	D_0__Bacteria	D_1__Firmicutes	D_2__Clostridia	D_3__Clostridiales	D_4__Ruminococcaceae	D_5__Ruminococcaceae UCG-014
denovo6488	0	0	0	0	0	0	0	0	0	1	3	1	0	3	1	0	0	1	0	0	Unassigned
denovo649	0	0	0	0	0	0	0	0	0	0	0	1	0	0	0	1	0	0	0	0	Unassigned
denovo6537	0	0	0	0	0	0	0	0	0	0	0	1	0	0	0	7	0	0	0	0	D_0__Bacteria	D_1__Firmicutes	D_2__Clostridia	D_3__Clostridiales	D_4__Lachnospiraceae
denovo6591	0	0	0	0	0	0	0	0	0	2	2	1	0	1	3	0	0	0	0	0	D_0__Bacteria	D_1__Firmicutes	D_2__Negativicutes	D_3__Selenomonadales	D_4__Veillonellaceae	D_5__Megasphaera
denovo6643	0	0	0	0	0	0	0	0	0	0	1	1	0	0	1	0	0	4	1	0	D_0__Bacteria	D_1__Actinobacteria	D_2__Actinobacteria	D_3__Bifidobacteriales	D_4__Bifidobacteriaceae	D_5__Bifidobacterium	D_6__uncultured bacterium
denovo675	0	0	0	0	0	0	0	0	0	0	2	1	0	0	9	4	0	0	0	0	D_0__Bacteria	D_1__Firmicutes	D_2__Negativicutes	D_3__Selenomonadales	D_4__Veillonellaceae		D_6__uncultured bacterium
denovo6750	0	0	0	0	0	0	0	0	0	3	4	1	0	0	0	1	0	0	0	0	D_0__Bacteria	D_1__Firmicutes	D_2__Clostridia	D_3__Clostridiales	D_4__Ruminococcaceae	D_5__Ruminococcaceae UCG-014	D_6__uncultured bacterium
denovo676	0	0	0	0	0	0	0	0	0	0	0	1	0	4	1	0	0	0	0	0	D_0__Bacteria	D_1__Firmicutes	D_2__Bacilli	D_3__Lactobacillales	D_4__Lactobacillaceae	D_5__Lactobacillus
denovo6792	0	0	3	3	0	0	0	0	0	0	0	1	0	0	0	0	0	0	0	1	D_0__Bacteria	D_1__Firmicutes	D_2__Bacilli	D_3__Lactobacillales	D_4__Lactobacillaceae	D_5__Lactobacillus
denovo6812	0	5	0	0	0	0	2	0	0	0	0	1	0	0	0	0	0	0	0	0	D_0__Bacteria	D_1__Firmicutes	D_2__Bacilli	D_3__Lactobacillales	D_4__Lactobacillaceae	D_5__Lactobacillus
denovo6910	0	0	0	0	0	0	0	0	0	0	0	1	0	0	0	2	0	0	0	0	D_0__Bacteria	D_1__Firmicutes	D_2__Bacilli	D_3__Lactobacillales	D_4__Lactobacillaceae	D_5__Lactobacillus	D_6__uncultured bacterium
denovo694	0	0	0	0	0	0	0	0	0	0	0	1	0	0	1	3	0	0	0	0	D_0__Bacteria	D_1__Firmicutes	D_2__Clostridia	D_3__Clostridiales	D_4__Family XIII	D_5__[Eubacterium] nodatum group	D_6__uncultured bacterium
denovo6943	0	0	0	0	1	0	0	0	0	1	3	1	1	2	0	0	0	1	0	0	D_0__Bacteria	D_1__Firmicutes	D_2__Erysipelotrichia	D_3__Erysipelotrichales	D_4__Erysipelotrichaceae	D_5__Erysipelotrichaceae UCG-004	D_6__uncultured bacterium
denovo6946	0	0	0	0	0	0	5	67	0	3	3	1	0	7	36	2	0	3	0	0	D_0__Bacteria	D_1__Firmicutes	D_2__Negativicutes	D_3__Selenomonadales	D_4__Veillonellaceae	D_5__Mitsuokella	D_6__uncultured bacterium
denovo6968	0	0	0	0	0	0	0	0	0	0	0	1	0	0	0	2	0	0	0	0	D_0__Bacteria	D_1__Firmicutes	D_2__Clostridia	D_3__Clostridiales	D_4__Lachnospiraceae	D_5__Acetitomaculum
denovo7044	0	0	0	0	0	0	0	0	0	0	0	1	0	0	0	0	0	0	0	0	Unassigned						D_6__uncultured bacterium
denovo7054	0	0	0	0	0	0	0	0	0	0	1	1	0	0	0	0	0	0	0	0	D_0__Bacteria	D_1__Firmicutes	D_2__Bacilli	D_3__Lactobacillales	D_4__Lactobacillaceae	D_5__Lactobacillus
denovo7084	0	0	0	0	0	0	0	0	0	0	0	1	0	0	0	7	0	0	0	3	D_0__Bacteria	D_1__Firmicutes	D_2__Negativicutes	D_3__Selenomonadales	D_4__Veillonellaceae	D_5__Dialister
denovo7119	0	0	0	0	0	0	0	0	0	0	0	1	0	0	0	0	0	0	0	0	D_0__Bacteria	D_1__Firmicutes	D_2__Negativicutes	D_3__Selenomonadales	D_4__Acidaminococcaceae	D_5__Acidaminococcus
denovo7238	0	0	0	0	0	0	0	0	0	1	2	1	0	2	140	234	0	0	0	0	D_0__Bacteria	D_1__Firmicutes	D_2__Erysipelotrichia	D_3__Erysipelotrichales	D_4__Erysipelotrichaceae	D_5__Sharpea
denovo7248	0	0	0	0	0	0	0	0	0	0	1	1	0	0	0	0	0	0	0	0	D_0__Bacteria	D_1__Firmicutes	D_2__Clostridia	D_3__Clostridiales	D_4__Lachnospiraceae	D_5__Syntrophococcus
denovo7311	0	0	0	0	0	0	0	0	1	1	0	1	0	0	0	0	0	0	0	0	D_0__Bacteria	D_1__Firmicutes	D_2__Clostridia	D_3__Clostridiales	D_4__Ruminococcaceae	D_5__Ruminiclostridium	D_6__uncultured bacterium
denovo7353	0	0	0	0	0	0	0	0	0	0	0	1	0	5	1	1	0	0	0	0	D_0__Bacteria	D_1__Firmicutes	D_2__Negativicutes	D_3__Selenomonadales	D_4__Veillonellaceae	D_5__uncultured
denovo7382	0	0	0	0	0	1	1	0	0	0	2	1	0	0	1	0	0	0	0	0	D_0__Bacteria	D_1__Firmicutes	D_2__Bacilli	D_3__Lactobacillales	D_4__Lactobacillaceae	D_5__Lactobacillus	D_6__uncultured delta proteobacterium
denovo7402	0	0	0	0	0	0	0	0	0	0	1	1	0	0	0	0	0	0	0	0	Unassigned
denovo753	0	1	0	0	0	0	0	0	0	0	0	1	0	0	0	0	0	0	0	0	Unassigned						D_6__uncultured Lentisphaerae bacterium
denovo7576	0	0	0	0	0	0	0	0	0	0	0	1	0	0	1	4	0	0	0	1	D_0__Bacteria	D_1__Firmicutes	D_2__Clostridia	D_3__Clostridiales	D_4__Family XIII	D_5__[Eubacterium] nodatum group	D_6__uncultured bacterium
denovo76	0	0	0	0	0	0	0	0	0	0	0	1	0	0	1	1	0	0	0	0	D_0__Bacteria	D_1__Firmicutes	D_2__Negativicutes	D_3__Selenomonadales	D_4__Veillonellaceae	D_5__Mitsuokella
denovo7656	0	0	0	0	0	0	0	0	0	0	1	1	0	0	0	0	0	0	0	0	Unassigned						D_6__uncultured bacterium
denovo766	0	0	0	0	0	0	0	0	0	0	0	1	0	0	0	2	0	0	0	0	D_0__Bacteria	D_1__Firmicutes	D_2__Negativicutes	D_3__Selenomonadales	D_4__Veillonellaceae	D_5__Dialister	D_6__uncultured bacterium
denovo7730	0	0	0	0	0	0	0	0	0	0	0	1	0	0	0	1	0	0	0	0	Unassigned						D_6__uncultured bacterium
denovo7767	0	0	0	0	0	0	0	0	0	0	0	1	0	0	0	1	0	0	0	0	D_0__Bacteria	D_1__Firmicutes	D_2__Bacilli	D_3__Lactobacillales	D_4__Lactobacillaceae	D_5__Lactobacillus	D_6__uncultured bacterium
denovo7806	0	0	0	0	0	0	0	2	0	1	2	1	0	3	2	0	0	1	2	0	D_0__Bacteria	D_1__Firmicutes	D_2__Negativicutes	D_3__Selenomonadales	D_4__Veillonellaceae	D_5__Mitsuokella
denovo7808	0	0	0	0	0	0	0	0	0	0	0	1	0	0	0	0	0	0	0	0	D_0__Bacteria	D_1__Firmicutes	D_2__Clostridia	D_3__Clostridiales	D_4__Eubacteriaceae	D_5__Eubacterium	D_6__uncultured bacterium
denovo7813	0	0	0	0	0	0	0	0	0	0	0	1	0	0	0	0	0	0	0	5	D_0__Bacteria	D_1__Firmicutes	D_2__Clostridia	D_3__Clostridiales	D_4__Eubacteriaceae	D_5__Pseudoramibacter
denovo7820	0	0	0	0	0	0	0	0	0	0	0	1	0	0	1	0	0	3	0	20	D_0__Bacteria	D_1__Firmicutes	D_2__Erysipelotrichia	D_3__Erysipelotrichales	D_4__Erysipelotrichaceae	D_5__Faecalicoccus
denovo7914	0	0	0	0	0	0	0	0	0	0	0	1	0	0	0	0	0	8	0	0	D_0__Bacteria	D_1__Firmicutes	D_2__Negativicutes	D_3__Selenomonadales	D_4__Acidaminococcaceae	D_5__Acidaminococcus	D_6__uncultured bacterium
denovo8161	0	0	0	0	0	0	0	0	0	11	9	1	0	5	0	0	0	0	0	0	D_0__Bacteria	D_1__Firmicutes	D_2__Clostridia	D_3__Clostridiales	D_4__Ruminococcaceae	D_5__Ruminococcaceae UCG-014
denovo8195	0	0	0	0	0	0	0	8	0	10	6	1	0	24	5	1	0	24	1	0	D_0__Bacteria	D_1__Firmicutes	D_2__Negativicutes	D_3__Selenomonadales	D_4__Veillonellaceae	D_5__uncultured
denovo8198	0	0	0	0	0	0	7	4	0	0	1	1	0	0	0	1	0	0	0	0	D_0__Bacteria	D_1__Firmicutes	D_2__Negativicutes	D_3__Selenomonadales	D_4__Veillonellaceae	D_5__Megasphaera	D_6__uncultured bacterium
denovo8201	0	0	0	0	0	0	0	0	0	0	0	1	0	0	0	1	0	0	0	0	D_0__Bacteria	D_1__Firmicutes	D_2__Clostridia	D_3__Clostridiales	D_4__Eubacteriaceae	D_5__Pseudoramibacter	D_6__uncultured bacterium
denovo8219	0	0	0	0	0	0	0	0	0	1	0	1	0	0	0	5	0	0	0	0	D_0__Bacteria	D_1__Firmicutes	D_2__Negativicutes	D_3__Selenomonadales	D_4__Acidaminococcaceae		D_6__uncultured bacterium
denovo8571	0	0	0	0	0	1	0	4	0	1	3	1	0	2	13	0	0	1	0	0	D_0__Bacteria	D_1__Firmicutes	D_2__Negativicutes	D_3__Selenomonadales	D_4__Veillonellaceae	D_5__Mitsuokella
denovo8587	0	0	0	0	0	0	0	0	0	0	2	1	0	4	11	0	0	1	0	0	D_0__Bacteria	D_1__Firmicutes	D_2__Negativicutes	D_3__Selenomonadales	D_4__Veillonellaceae		D_6__uncultured bacterium
denovo8612	0	0	0	0	0	0	0	0	0	0	0	1	0	0	0	0	0	0	0	0	Unassigned						D_6__uncultured bacterium
denovo8695	0	0	0	0	0	0	1	57	0	16	13	1	0	31	37	3	0	2	0	0	D_0__Bacteria	D_1__Firmicutes	D_2__Negativicutes	D_3__Selenomonadales	D_4__Veillonellaceae	D_5__Megasphaera	D_6__uncultured bacterium
denovo8696	0	0	0	0	0	0	0	0	0	0	0	1	0	0	1	0	0	0	0	0	D_0__Bacteria	D_1__Firmicutes	D_2__Negativicutes	D_3__Selenomonadales	D_4__Veillonellaceae	D_5__Mitsuokella
denovo8767	0	0	0	0	0	0	0	0	0	0	0	1	0	0	0	0	0	0	0	0	D_0__Bacteria	D_1__Firmicutes	D_2__Negativicutes	D_3__Selenomonadales	D_4__Veillonellaceae	D_5__Mitsuokella
denovo8780	0	1	0	0	0	0	0	0	0	0	3	1	0	1	0	0	0	0	0	0	D_0__Bacteria	D_1__Firmicutes	D_2__Erysipelotrichia	D_3__Erysipelotrichales	D_4__Erysipelotrichaceae	D_5__Erysipelotrichaceae UCG-004
denovo8798	0	0	0	0	0	0	0	0	0	0	0	1	0	0	1	0	0	1	0	0	D_0__Bacteria	D_1__Proteobacteria	D_2__Betaproteobacteria	D_3__Burkholderiales	D_4__Alcaligenaceae	D_5__Sutterella	D_6__uncultured bacterium
denovo8804	0	0	0	0	0	0	1	0	0	0	1	1	0	0	0	0	0	0	0	0	D_0__Bacteria	D_1__Firmicutes	D_2__Clostridia	D_3__Clostridiales	D_4__Defluviitaleaceae	D_5__Defluviitaleaceae UCG-011
denovo8864	0	0	0	0	0	0	0	0	0	2	3	1	0	2	9	13	0	0	0	0	D_0__Bacteria	D_1__Firmicutes	D_2__Negativicutes	D_3__Selenomonadales	D_4__Veillonellaceae	D_5__Mitsuokella	D_6__uncultured bacterium
denovo8868	0	0	0	0	0	0	0	0	0	0	0	1	0	0	1	0	0	0	0	0	D_0__Bacteria	D_1__Firmicutes	D_2__Clostridia	D_3__Clostridiales	D_4__Eubacteriaceae	D_5__Pseudoramibacter	D_6__uncultured bacterium
denovo8881	0	0	0	0	0	0	0	0	0	1	7	1	0	0	1	0	0	0	0	0	D_0__Bacteria	D_1__Firmicutes	D_2__Negativicutes	D_3__Selenomonadales	D_4__Veillonellaceae	D_5__Mitsuokella
denovo8896	0	0	0	0	0	0	0	0	0	0	5	1	0	2	5	0	0	0	0	0	D_0__Bacteria	D_1__Firmicutes	D_2__Negativicutes	D_3__Selenomonadales	D_4__Veillonellaceae	D_5__Mitsuokella
denovo8925	0	0	0	0	0	0	0	0	0	0	0	1	0	1	0	1	0	0	0	0	D_0__Bacteria	D_1__Firmicutes	D_2__Negativicutes	D_3__Selenomonadales	D_4__Veillonellaceae
denovo8958	0	0	0	0	0	0	0	0	0	0	6	1	0	0	12	0	0	0	1	0	D_0__Bacteria	D_1__Firmicutes	D_2__Clostridia	D_3__Clostridiales	D_4__Lachnospiraceae	D_5__Lachnospiraceae NK3A20 group
denovo8975	0	0	0	0	0	0	0	0	0	0	0	1	0	2	3	0	0	0	0	0	Unassigned						D_6__uncultured bacterium
denovo9133	0	0	0	0	0	0	0	0	0	0	0	1	0	0	0	0	0	0	0	0	D_0__Bacteria	D_1__Firmicutes	D_2__Negativicutes	D_3__Selenomonadales	D_4__Veillonellaceae		D_6__uncultured bacterium
denovo9154	0	0	0	0	0	0	0	0	0	0	1	1	0	0	2	2	0	0	0	0	D_0__Bacteria	D_1__Firmicutes	D_2__Negativicutes	D_3__Selenomonadales	D_4__Veillonellaceae	D_5__Mitsuokella	D_6__uncultured bacterium
denovo917	0	0	0	0	0	0	0	0	0	0	0	1	0	0	0	0	0	0	0	0	D_0__Bacteria	D_1__Actinobacteria	D_2__Coriobacteriia	D_3__Coriobacteriales	D_4__Coriobacteriaceae	D_5__Olsenella	D_6__uncultured bacterium
denovo9197	0	4	0	0	0	0	0	1	0	0	0	1	0	0	0	0	0	0	0	0	D_0__Bacteria	D_1__Firmicutes	D_2__Bacilli	D_3__Lactobacillales	D_4__Lactobacillaceae	D_5__Lactobacillus
denovo927	0	0	0	0	0	0	0	0	0	0	0	1	0	0	0	0	0	0	0	0	D_0__Bacteria	D_1__Firmicutes	D_2__Clostridia	D_3__Clostridiales	D_4__Eubacteriaceae	D_5__Pseudoramibacter	D_6__uncultured organism
denovo9283	0	0	0	0	0	0	0	0	0	2	5	1	0	0	0	0	0	0	0	0	D_0__Bacteria	D_1__Firmicutes	D_2__Clostridia	D_3__Clostridiales	D_4__Ruminococcaceae	D_5__Ruminococcaceae UCG-014	D_6__uncultured bacterium
denovo9297	0	0	0	0	0	0	0	2	0	0	1	1	0	2	5	1	0	0	2	0	D_0__Bacteria	D_1__Firmicutes	D_2__Negativicutes	D_3__Selenomonadales	D_4__Veillonellaceae	D_5__Dialister	D_6__uncultured bacterium
denovo9332	0	0	0	0	0	0	0	0	0	2	3	1	0	3	1	0	0	0	0	0	Unassigned
denovo9361	0	0	3	0	0	0	0	0	0	0	0	1	0	0	0	0	0	0	0	0	D_0__Bacteria	D_1__Firmicutes	D_2__Bacilli	D_3__Lactobacillales	D_4__Lactobacillaceae	D_5__Lactobacillus	D_6__uncultured bacterium
denovo9402	0	0	0	0	0	0	0	0	0	0	0	1	0	0	0	0	0	0	0	0	D_0__Bacteria	D_1__Actinobacteria	D_2__Coriobacteriia	D_3__Coriobacteriales	D_4__Coriobacteriaceae		D_6__uncultured bacterium
denovo9421	0	0	0	0	0	0	0	0	0	1	0	1	0	0	0	2	0	1	0	0	D_0__Bacteria	D_1__Firmicutes	D_2__Bacilli	D_3__Lactobacillales	D_4__Lactobacillaceae	D_5__Lactobacillus
denovo9521	0	0	0	0	0	0	0	0	0	0	1	1	0	0	1	0	0	0	0	0	Unassigned
denovo953	0	0	0	0	0	0	0	0	0	0	2	1	0	2	0	0	0	0	0	0	Unassigned
denovo96	0	0	0	0	0	0	0	0	0	0	0	1	0	0	0	0	0	0	0	0	D_0__Bacteria	D_1__TM6	D_2__uncultured bacterium	D_3__uncultured bacterium	D_4__uncultured bacterium	D_5__uncultured bacterium
denovo9601	0	0	0	0	0	0	0	0	0	0	0	1	0	0	0	0	0	0	0	0	D_0__Bacteria	D_1__Firmicutes	D_2__Bacilli	D_3__Lactobacillales	D_4__Lactobacillaceae	D_5__Lactobacillus	D_6__uncultured soil bacterium
denovo9605	0	0	0	0	0	0	0	0	0	0	0	1	0	0	0	0	0	0	0	0	Unassigned						D_6__uncultured organism
denovo966	0	0	0	0	0	0	0	0	0	0	0	1	0	0	2	0	0	0	0	0	D_0__Bacteria	D_1__Firmicutes	D_2__Negativicutes	D_3__Selenomonadales	D_4__Veillonellaceae	D_5__Mitsuokella
denovo9676	0	0	0	0	0	0	0	0	0	0	1	1	0	0	0	0	0	0	0	0	D_0__Bacteria	D_1__Firmicutes	D_2__Erysipelotrichia	D_3__Erysipelotrichales	D_4__Erysipelotrichaceae	D_5__Solobacterium
denovo9749	0	0	0	0	0	0	1	0	0	1	4	1	0	0	0	0	0	0	0	0	D_0__Bacteria	D_1__Bacteroidetes	D_2__Bacteroidia	D_3__Bacteroidales	D_4__Prevotellaceae	D_5__Prevotella 1
denovo975	0	0	0	0	0	0	3	0	0	0	0	1	0	0	1	0	0	0	0	0	D_0__Bacteria	D_1__Firmicutes	D_2__Negativicutes	D_3__Selenomonadales	D_4__Veillonellaceae	D_5__Mitsuokella
denovo9840	0	0	0	0	0	0	0	0	0	0	1	1	0	0	0	0	0	0	0	0	Unassigned
denovo9868	0	0	0	0	0	0	0	0	0	0	0	1	0	0	0	0	0	0	0	0	D_0__Bacteria	D_1__Firmicutes	D_2__Negativicutes	D_3__Selenomonadales	D_4__Veillonellaceae	D_5__Mitsuokella	D_6__uncultured bacterium
denovo9877	0	0	0	0	0	0	0	0	0	0	0	1	0	0	0	7	0	0	0	0	D_0__Bacteria	D_1__Firmicutes	D_2__Negativicutes	D_3__Selenomonadales	D_4__Veillonellaceae	D_5__uncultured	D_6__uncultured bacterium
denovo9909	0	0	0	0	0	0	0	0	0	0	0	1	0	0	0	0	0	0	1	0	D_0__Bacteria	D_1__Firmicutes	D_2__Erysipelotrichia	D_3__Erysipelotrichales	D_4__Erysipelotrichaceae	D_5__Catenibacterium	D_6__uncultured bacterium
denovo9929	0	0	0	0	0	0	0	0	0	1	1	1	0	0	0	0	0	0	0	0	D_0__Bacteria	D_1__Proteobacteria	D_2__Deltaproteobacteria	D_3__Desulfovibrionales	D_4__Desulfovibrionaceae	D_5__Desulfovibrio
denovo9959	0	0	0	0	0	0	1	1	1	0	0	1	0	0	0	0	0	0	0	0	D_0__Bacteria	D_1__Proteobacteria	D_2__Deltaproteobacteria	D_3__Desulfovibrionales	D_4__Desulfovibrionaceae	D_5__Desulfovibrio	D_6__uncultured bacterium
denovo14467	2765	7	0	2	4189	0	0	1	3734	0	0	0	4302	17	1	0	3171	1	0	0	Unassigned
denovo13356	2475	138	8	0	2115	0	1	0	2495	19	4	0	1682	4	0	1	1868	2	0	0	D_0__Bacteria	D_1__Proteobacteria	D_2__Epsilonproteobacteria	D_3__Campylobacterales	D_4__Campylobacteraceae	D_5__Arcobacter
denovo2378	2209	65	4	1	1213	16	0	0	1684	41	5	0	1260	8	0	0	1955	7	0	0	D_0__Bacteria	D_1__Bacteroidetes	D_2__Sphingobacteriia	D_3__Sphingobacteriales	D_4__Saprospiraceae	D_5__uncultured
denovo10860	1394	31	4	1	620	0	0	0	1143	0	0	0	781	2	1	0	1215	0	0	0	D_0__Bacteria	D_1__Proteobacteria	D_2__Epsilonproteobacteria	D_3__Campylobacterales	D_4__Campylobacteraceae	D_5__Arcobacter
denovo3413	830	155	8	7	640	9	5	1	583	7	7	0	748	4	0	0	765	1	0	0	D_0__Bacteria	D_1__Proteobacteria	D_2__Betaproteobacteria	D_3__Rhodocyclales	D_4__Rhodocyclaceae		D_6__uncultured bacterium
denovo20377	511	56	3	1	473	0	0	0	625	14	0	0	408	0	0	0	604	5	0	0	D_0__Bacteria	D_1__Bacteroidetes	D_2__Sphingobacteriia	D_3__Sphingobacteriales	D_4__Chitinophagaceae	D_5__Sediminibacterium	D_6__uncultured bacterium
denovo8294	338	16	1	1	156	0	0	0	220	0	0	0	150	0	0	0	135	0	0	0	D_0__Bacteria	D_1__Proteobacteria	D_2__Gammaproteobacteria	D_3__Aeromonadales	D_4__Aeromonadaceae	D_5__Aeromonas	D_6__uncultured bacterium
denovo16776	316	20	0	1	340	0	0	0	248	1	1	0	316	0	0	0	307	2	0	0	D_0__Bacteria	D_1__Bacteroidetes	D_2__Cytophagia	D_3__Cytophagales	D_4__Cytophagaceae	D_5__uncultured	D_6__uncultured bacterium
denovo14943	299	15	4	2	210	27	3	0	235	1	1	0	254	1	0	0	344	1	0	0	D_0__Bacteria	D_1__Firmicutes	D_2__Bacilli	D_3__Lactobacillales	D_4__Carnobacteriaceae	D_5__Trichococcus
denovo4007	297	53	1	2	211	0	0	1	196	2	0	0	158	0	0	0	277	2	0	0	D_0__Bacteria	D_1__Bacteroidetes	D_2__Sphingobacteriia	D_3__Sphingobacteriales	D_4__Chitinophagaceae	D_5__Hydrotalea
denovo5688	294	11	0	0	345	8	3	0	395	2	0	0	333	6	0	0	401	1	0	0	D_0__Bacteria	D_1__Proteobacteria	D_2__Betaproteobacteria	D_3__Burkholderiales	D_4__Comamonadaceae
denovo1511	280	5	1	1	287	2	0	0	218	4	2	0	205	2	0	0	198	1	0	0	D_0__Bacteria	D_1__Bacteroidetes	D_2__Bacteroidia	D_3__Bacteroidales	D_4__Porphyromonadaceae	D_5__Macellibacteroides	D_6__Proteus mirabilis
denovo6572	200	3	3	0	174	0	0	0	119	0	0	0	103	0	0	0	76	0	0	0	D_0__Bacteria	D_1__Fusobacteria	D_2__Fusobacteriia	D_3__Fusobacteriales	D_4__Leptotrichiaceae	D_5__uncultured
denovo4053	186	15	1	0	102	0	0	0	122	0	0	0	122	0	0	0	194	1	0	0	D_0__Bacteria	D_1__Bacteroidetes	D_2__Flavobacteriia	D_3__Flavobacteriales	D_4__Flavobacteriaceae	D_5__Flavobacterium	D_6__uncultured bacterium
denovo16052	180	63	3	0	289	59	15	3	173	107	17	0	349	11	0	0	225	28	0	0	D_0__Bacteria	D_1__Firmicutes	D_2__Clostridia	D_3__Clostridiales	D_4__Ruminococcaceae	D_5__Oscillibacter
denovo7427	178	1	0	0	127	2	0	0	86	5	0	0	86	1	0	0	109	0	0	0	D_0__Bacteria	D_1__Bacteroidetes	D_2__Bacteroidia	D_3__Bacteroidales	D_4__Prevotellaceae	D_5__Prevotella 9
denovo15797	175	13	0	0	147	1	0	0	217	7	3	0	155	1	0	0	228	1	0	0	D_0__Bacteria	D_1__Proteobacteria	D_2__Betaproteobacteria	D_3__Burkholderiales	D_4__Comamonadaceae		D_6__uncultured bacterium
denovo15237	165	0	0	0	268	0	0	0	203	6	1	0	157	0	0	0	260	0	1	1	Unassigned						D_6__uncultured bacterium
denovo6573	165	19	1	0	221	5	5	0	215	8	0	0	197	0	0	0	179	0	0	0	D_0__Bacteria	D_1__Firmicutes	D_2__Clostridia	D_3__Clostridiales	D_4__Lachnospiraceae	D_5__Pseudobutyrivibrio	D_6__uncultured bacterium
denovo13780	152	20	1	0	216	1	0	0	157	3	1	0	125	0	0	0	118	0	2	0	D_0__Bacteria	D_1__Bacteroidetes	D_2__Flavobacteriia	D_3__Flavobacteriales	D_4__Flavobacteriaceae	D_5__Cloacibacterium
denovo22321	142	6	1	1	143	1	0	0	115	3	2	0	130	0	0	0	134	1	0	0	D_0__Bacteria	D_1__Proteobacteria	D_2__Betaproteobacteria	D_3__Burkholderiales	D_4__Comamonadaceae	D_5__uncultured
denovo21343	139	0	0	0	112	0	0	0	104	1	0	0	122	0	0	0	154	0	0	0	D_0__Bacteria	D_1__Bacteroidetes	D_2__Cytophagia	D_3__Cytophagales	D_4__Cytophagaceae	D_5__uncultured
denovo14948	128	12	1	1	156	2	0	1	126	0	0	0	134	0	0	0	153	1	0	0	D_0__Bacteria	D_1__Chloroflexi	D_2__Caldilineae	D_3__Caldilineales	D_4__Caldilineaceae	D_5__uncultured	D_6__Proteus mirabilis
denovo10412	126	6	0	0	102	1	0	0	83	1	1	0	100	0	0	0	112	1	0	0	D_0__Bacteria	D_1__Proteobacteria	D_2__Betaproteobacteria	D_3__Burkholderiales	D_4__Comamonadaceae
denovo6028	121	3	0	0	86	0	0	0	109	0	0	0	88	0	0	0	122	0	0	0	D_0__Bacteria	D_1__Bacteroidetes	D_2__Sphingobacteriia	D_3__Sphingobacteriales	D_4__Saprospiraceae	D_5__uncultured
denovo1467	117	40	1	0	114	1	0	0	104	0	1	0	104	3	0	0	102	1	1	0	D_0__Bacteria	D_1__Proteobacteria	D_2__Gammaproteobacteria	D_3__Pseudomonadales	D_4__Moraxellaceae	D_5__Acinetobacter
denovo18452	114	22	5	0	31	13	1	1	79	4	2	0	91	5	1	0	98	8	1	1	D_0__Bacteria	D_1__Proteobacteria	D_2__Betaproteobacteria	D_3__Rhodocyclales	D_4__Rhodocyclaceae	D_5__Thauera	D_6__uncultured bacterium
denovo7627	111	0	0	0	48	0	0	0	100	0	0	0	84	0	0	0	127	1	1	0	D_0__Bacteria	D_1__Spirochaetae	D_2__Spirochaetes	D_3__Spirochaetales	D_4__Spirochaetaceae	D_5__Treponema 2
denovo15532	110	15	0	0	145	7	4	1	103	3	1	0	96	4	0	0	84	2	0	0	D_0__Bacteria	D_1__Proteobacteria	D_2__Betaproteobacteria	D_3__Neisseriales	D_4__Neisseriaceae	D_5__Vitreoscilla	D_6__uncultured bacterium
denovo3182	107	6	2	2	62	0	0	0	81	0	0	0	77	1	0	0	95	1	0	0	D_0__Bacteria	D_1__Bacteroidetes	D_2__Sphingobacteriia	D_3__Sphingobacteriales	D_4__Chitinophagaceae	D_5__uncultured
denovo1040	103	17	1	0	52	0	0	0	84	2	2	0	102	0	0	0	72	1	1	0	D_0__Bacteria	D_1__Proteobacteria	D_2__Betaproteobacteria	D_3__Rhodocyclales	D_4__Rhodocyclaceae	D_5__Dechloromonas	D_6__uncultured organism
denovo771	100	5	0	0	42	0	0	0	107	0	0	0	41	0	0	0	63	0	0	0	D_0__Bacteria	D_1__Proteobacteria	D_2__Epsilonproteobacteria	D_3__Campylobacterales	D_4__Campylobacteraceae	D_5__Arcobacter	D_6__uncultured bacterium
denovo20953	99	27	3	0	59	1	0	0	101	7	2	0	52	0	0	0	128	0	0	0	D_0__Bacteria	D_1__Firmicutes	D_2__Clostridia	D_3__Clostridiales	D_4__Clostridiaceae 1	D_5__Clostridium sensu stricto 12
denovo9042	99	0	0	0	75	0	0	0	60	1	0	0	73	0	0	0	89	0	0	0	D_0__Bacteria	D_1__Bacteroidetes	D_2__Sphingobacteriia	D_3__Sphingobacteriales	D_4__Saprospiraceae	D_5__Phaeodactylibacter
denovo12517	97	13	0	0	90	0	0	0	77	1	0	0	87	0	0	0	113	2	1	0	D_0__Bacteria	D_1__Bacteroidetes	D_2__Flavobacteriia	D_3__Flavobacteriales	D_4__NS9 marine group	D_5__uncultured bacterium
denovo10033	95	4	1	0	168	0	0	0	169	5	1	0	148	2	0	0	144	1	0	0	D_0__Bacteria	D_1__Bacteroidetes	D_2__Flavobacteriia	D_3__Flavobacteriales	D_4__Flavobacteriaceae	D_5__Flavobacterium	D_6__uncultured bacterium
denovo17530	95	10	1	0	97	0	0	0	68	2	2	0	73	2	0	0	93	0	0	0	D_0__Bacteria	D_1__Proteobacteria	D_2__Betaproteobacteria	D_3__Methylophilales	D_4__Methylophilaceae	D_5__Methylotenera	D_6__uncultured bacterium
denovo20082	95	3	0	0	87	0	0	0	69	0	0	0	73	0	0	0	86	0	0	0	D_0__Bacteria	D_1__Bacteroidetes	D_2__Flavobacteriia	D_3__Flavobacteriales	D_4__Flavobacteriaceae	D_5__Flavobacterium
denovo19166	93	11	0	0	98	7	2	1	64	11	5	0	89	7	0	0	97	4	2	0	D_0__Bacteria	D_1__Proteobacteria	D_2__Alphaproteobacteria	D_3__Sphingomonadales	D_4__Sphingomonadaceae	D_5__Sphingopyxis	D_6__uncultured bacterium
denovo17082	91	2	1	0	37	0	0	0	80	0	0	0	71	0	0	0	73	0	0	0	D_0__Bacteria	D_1__Bacteroidetes	D_2__Sphingobacteriia	D_3__Sphingobacteriales	D_4__Saprospiraceae	D_5__uncultured	D_6__uncultured bacterium
denovo14082	89	2	0	0	92	0	0	0	36	0	0	0	60	0	0	0	62	0	0	0	D_0__Bacteria	D_1__Bacteroidetes	D_2__Bacteroidia	D_3__Bacteroidales	D_4__Bacteroidaceae	D_5__Bacteroides	D_6__uncultured bacterium
denovo14102	87	17	1	0	97	2	0	0	79	5	1	0	111	1	0	0	113	2	0	0	D_0__Bacteria	D_1__Proteobacteria	D_2__Betaproteobacteria	D_3__Burkholderiales	D_4__Comamonadaceae
denovo6178	84	1	1	0	52	0	0	0	75	1	0	0	42	1	0	0	54	0	1	0	D_0__Bacteria	D_1__Proteobacteria	D_2__Epsilonproteobacteria	D_3__Campylobacterales	D_4__Campylobacteraceae	D_5__Sulfurospirillum	D_6__uncultured bacterium
denovo5200	83	7	1	0	55	2	1	0	67	1	0	0	47	0	0	0	61	0	0	0	D_0__Bacteria	D_1__Proteobacteria	D_2__Deltaproteobacteria	D_3__Desulfovibrionales	D_4__Desulfomicrobiaceae	D_5__Desulfomicrobium
denovo7229	83	1	0	0	91	0	0	0	91	0	0	0	80	0	0	0	135	0	0	0	D_0__Bacteria	D_1__Bacteroidetes	D_2__Sphingobacteriia	D_3__Sphingobacteriales	D_4__Sphingobacteriaceae	D_5__Pedobacter
denovo4556	82	2	0	0	14	0	0	0	32	1	0	0	44	0	0	0	43	0	0	0	D_0__Bacteria	D_1__Bacteroidetes	D_2__Sphingobacteriia	D_3__Sphingobacteriales	D_4__Saprospiraceae	D_5__uncultured	D_6__uncultured bacterium
denovo4648	78	0	0	0	83	0	0	0	81	0	0	0	75	0	0	0	89	0	0	0	D_0__Bacteria	D_1__Bacteroidetes	D_2__Flavobacteriia	D_3__Flavobacteriales	D_4__Flavobacteriaceae	D_5__Flavobacterium
denovo16016	76	6	0	1	82	6	1	0	80	2	0	0	58	2	0	0	79	2	0	0	D_0__Bacteria	D_1__Proteobacteria	D_2__Betaproteobacteria	D_3__Burkholderiales	D_4__Comamonadaceae	D_5__Acidovorax	D_6__uncultured bacterium
denovo19493	76	0	2	0	45	0	0	0	65	1	0	0	44	0	0	0	80	0	0	0	D_0__Bacteria	D_1__Proteobacteria	D_2__Betaproteobacteria	D_3__Burkholderiales	D_4__Comamonadaceae		D_6__uncultured bacterium
denovo286	74	6	0	0	46	1	0	0	56	0	0	0	53	0	0	0	81	0	0	0	D_0__Bacteria	D_1__Proteobacteria	D_2__Betaproteobacteria	D_3__Burkholderiales	D_4__Comamonadaceae	D_5__Polaromonas	D_6__uncultured bacterium
denovo9072	71	6	0	0	31	4	0	0	57	2	0	0	62	0	0	0	77	1	0	0	D_0__Bacteria	D_1__Proteobacteria	D_2__Betaproteobacteria	D_3__Burkholderiales	D_4__Comamonadaceae	D_5__uncultured	D_6__uncultured bacterium
denovo11307	69	4	1	0	46	0	0	0	30	10	1	0	35	0	0	0	31	5	0	0	Unassigned
denovo9430	68	3	0	0	58	0	0	0	78	1	0	0	41	0	0	0	54	0	0	0	D_0__Bacteria	D_1__Bacteroidetes	D_2__Bacteroidia	D_3__Bacteroidales	D_4__Porphyromonadaceae	D_5__Paludibacter
denovo20421	67	4	0	0	38	0	0	0	40	0	0	0	45	0	1	0	62	0	0	0	D_0__Bacteria	D_1__Proteobacteria	D_2__Gammaproteobacteria	D_3__Pseudomonadales	D_4__Pseudomonadaceae	D_5__Pseudomonas
denovo13346	65	2	0	0	76	1	0	0	59	0	0	0	57	0	0	0	82	1	0	0	D_0__Bacteria	D_1__Bacteroidetes	D_2__Sphingobacteriia	D_3__Sphingobacteriales	D_4__Saprospiraceae	D_5__uncultured
denovo20083	65	1	3	0	40	0	0	0	49	0	0	0	49	0	0	0	43	0	0	0	D_0__Bacteria	D_1__Fusobacteria	D_2__Fusobacteriia	D_3__Fusobacteriales	D_4__Hados.Sed.Eubac.3	D_5__uncultured bacterium	D_6__uncultured bacterium
denovo1791	64	6	0	0	40	0	0	0	63	1	0	0	52	1	0	0	84	1	0	0	D_0__Bacteria	D_1__Proteobacteria	D_2__Betaproteobacteria	D_3__Burkholderiales	D_4__Comamonadaceae	D_5__Aquabacterium	D_6__uncultured bacterium
denovo21736	64	0	0	0	75	0	0	0	62	0	0	0	76	0	0	0	73	0	0	0	D_0__Bacteria	D_1__Bacteroidetes	D_2__Flavobacteriia	D_3__Flavobacteriales	D_4__Flavobacteriaceae	D_5__Flavobacterium
denovo14466	62	11	0	0	58	1	0	0	60	3	0	0	63	0	0	0	49	0	0	0	D_0__Bacteria	D_1__Bacteroidetes	D_2__Sphingobacteriia	D_3__Sphingobacteriales	D_4__Chitinophagaceae	D_5__Ferruginibacter	D_6__uncultured bacterium
denovo15550	62	7	0	0	5	1	0	0	10	1	1	0	3	0	0	0	25	1	0	0	D_0__Bacteria	D_1__Saccharibacteria	D_2__uncultured bacterium	D_3__uncultured bacterium	D_4__uncultured bacterium	D_5__uncultured bacterium
denovo22320	61	14	0	0	29	0	0	0	39	1	1	0	29	1	0	0	45	1	0	0	D_0__Bacteria	D_1__Bacteroidetes	D_2__Sphingobacteriia	D_3__Sphingobacteriales	D_4__Chitinophagaceae	D_5__Filimonas
denovo8531	57	3	0	0	38	0	0	1	50	0	0	0	51	0	0	0	44	0	0	0	D_0__Bacteria	D_1__Proteobacteria	D_2__Gammaproteobacteria	D_3__Enterobacteriales	D_4__Enterobacteriaceae	D_5__Citrobacter	D_6__uncultured bacterium
denovo4927	56	12	0	2	47	4	1	0	44	0	4	0	33	0	0	0	39	1	0	0	D_0__Bacteria	D_1__Proteobacteria	D_2__Betaproteobacteria	D_3__Burkholderiales	D_4__Burkholderiaceae	D_5__Lautropia
denovo17177	55	1	0	0	43	0	0	0	51	0	0	0	30	0	0	0	39	1	0	0	D_0__Bacteria	D_1__Proteobacteria	D_2__Betaproteobacteria				D_6__uncultured bacterium
denovo20144	55	1	0	0	43	0	0	0	34	0	0	0	20	0	0	0	55	0	0	0	D_0__Bacteria	D_1__Chloroflexi	D_2__uncultured	D_3__uncultured bacterium	D_4__uncultured bacterium	D_5__uncultured bacterium	D_6__uncultured bacterium
denovo3030	55	4	0	0	36	0	1	0	53	0	0	0	57	0	0	0	44	0	0	0	D_0__Bacteria	D_1__Proteobacteria	D_2__Epsilonproteobacteria	D_3__Campylobacterales	D_4__Campylobacteraceae	D_5__Arcobacter	D_6__uncultured bacterium
denovo4177	55	1	0	0	31	2	0	0	17	1	0	0	37	0	0	0	35	0	0	0	D_0__Bacteria	D_1__Firmicutes	D_2__Negativicutes	D_3__Selenomonadales	D_4__Veillonellaceae	D_5__Propionispira	D_6__uncultured bacterium
denovo7800	54	4	1	0	38	0	0	0	28	0	0	0	42	0	0	0	42	0	0	0	D_0__Bacteria	D_1__Bacteroidetes	D_2__Sphingobacteriia	D_3__Sphingobacteriales	D_4__Saprospiraceae	D_5__uncultured	D_6__uncultured bacterium
denovo17621	53	2	0	0	10	0	0	0	32	1	0	0	17	0	0	0	17	0	0	0	D_0__Bacteria	D_1__Bacteroidetes	D_2__Sphingobacteriia	D_3__Sphingobacteriales	D_4__Saprospiraceae	D_5__uncultured	D_6__uncultured bacterium
denovo19528	53	8	1	0	46	4	0	0	51	1	0	0	54	1	1	0	45	0	0	0	D_0__Bacteria	D_1__Proteobacteria	D_2__Betaproteobacteria	D_3__Rhodocyclales	D_4__Rhodocyclaceae	D_5__Thauera	D_6__uncultured bacterium
denovo20066	53	0	0	0	46	0	0	0	42	3	0	0	65	0	0	0	36	0	0	0	D_0__Bacteria	D_1__Bacteroidetes	D_2__Bacteroidia	D_3__Bacteroidales	D_4__Prevotellaceae	D_5__Prevotella 1	D_6__uncultured bacterium
denovo20958	53	39	0	0	69	2	0	0	49	21	0	0	61	88	0	0	36	0	0	0	D_0__Bacteria	D_1__Bacteroidetes	D_2__Bacteroidia	D_3__Bacteroidales	D_4__Prevotellaceae	D_5__Prevotella 7
denovo2821	53	14	0	1	51	3	0	0	47	2	2	0	69	0	0	1	71	0	1	0	D_0__Bacteria	D_1__Proteobacteria	D_2__Betaproteobacteria	D_3__Rhodocyclales	D_4__Rhodocyclaceae	D_5__Zoogloea
denovo5522	53	8	1	0	44	0	0	0	40	2	0	0	28	0	0	0	54	2	0	0	D_0__Bacteria	D_1__Bacteroidetes	D_2__Flavobacteriia	D_3__Flavobacteriales	D_4__Flavobacteriaceae	D_5__Flavobacterium	D_6__uncultured bacterium
denovo8211	53	5	0	0	40	1	0	0	45	0	3	0	26	3	0	0	39	1484	401	82	D_0__Bacteria	D_1__Bacteroidetes	D_2__Bacteroidia	D_3__Bacteroidales	D_4__Bacteroidaceae	D_5__Bacteroides
denovo5605	52	10	0	0	58	3	0	0	53	6	0	0	46	2	0	0	51	5	1	0	D_0__Bacteria	D_1__Proteobacteria	D_2__Alphaproteobacteria	D_3__Sphingomonadales	D_4__Sphingomonadaceae	D_5__Zymomonas	D_6__uncultured bacterium
denovo9743	52	4	0	1	69	0	0	0	75	0	0	0	103	0	0	0	80	0	0	0	D_0__Bacteria	D_1__Nitrospirae	D_2__Nitrospira	D_3__Nitrospirales	D_4__Nitrospiraceae	D_5__Nitrospira
denovo11898	51	1	0	0	31	0	0	0	25	1	0	0	23	0	0	0	35	0	0	0	D_0__Bacteria	D_1__Proteobacteria	D_2__Deltaproteobacteria	D_3__Myxococcales	D_4__mle1-27	D_5__uncultured delta proteobacterium	D_6__uncultured organism
denovo9302	51	2	0	0	41	0	0	0	23	0	0	0	30	0	0	0	53	0	0	0	D_0__Bacteria	D_1__Bacteroidetes	D_2__Sphingobacteriia	D_3__Sphingobacteriales	D_4__Chitinophagaceae	D_5__uncultured
denovo5140	49	5	1	0	77	2	1	0	46	0	0	0	55	0	0	0	50	0	1	1	D_0__Bacteria	D_1__Proteobacteria	D_2__Gammaproteobacteria	D_3__Pasteurellales	D_4__Pasteurellaceae	D_5__Chelonobacter
denovo5223	49	7	0	0	39	0	0	0	61	1	1	0	44	1	0	0	62	0	0	0	D_0__Bacteria	D_1__Proteobacteria	D_2__Betaproteobacteria	D_3__Burkholderiales	D_4__Comamonadaceae	D_5__uncultured	D_6__uncultured bacterium
denovo13869	48	13	0	0	15	1	0	0	15	4	1	0	32	0	0	0	19	0	0	0	D_0__Bacteria	D_1__Firmicutes	D_2__Clostridia	D_3__Clostridiales	D_4__Ruminococcaceae	D_5__Ruminococcus 1	D_6__uncultured bacterium
denovo8038	48	1	0	0	23	0	0	0	23	0	0	0	35	0	0	0	24	0	0	0	D_0__Bacteria	D_1__Proteobacteria	D_2__Gammaproteobacteria	D_3__Aeromonadales	D_4__Aeromonadaceae	D_5__Aeromonas
denovo12110	47	7	0	0	54	1	0	0	50	3	0	0	55	1	0	0	53	0	1	0	D_0__Bacteria	D_1__Chloroflexi	D_2__Caldilineae	D_3__Caldilineales	D_4__Caldilineaceae	D_5__uncultured
denovo12256	47	26	0	0	187	89	26	5	82	93	9	0	79	0	0	0	101	0	0	0	D_0__Bacteria	D_1__Bacteroidetes	D_2__Bacteroidia	D_3__Bacteroidales	D_4__uncultured	D_5__uncultured bacterium
denovo17825	46	6	0	0	63	0	0	0	47	0	0	0	46	0	0	0	53	0	0	0	D_0__Bacteria	D_1__Bacteroidetes	D_2__Sphingobacteriia	D_3__Sphingobacteriales	D_4__PHOS-HE51	D_5__uncultured bacterium
denovo9075	46	8	2	0	55	0	0	0	36	2	1	0	80	0	0	0	63	3	0	0	D_0__Bacteria	D_1__Proteobacteria	D_2__Betaproteobacteria	D_3__Burkholderiales	D_4__Comamonadaceae		D_6__uncultured bacterium
denovo3041	45	0	0	0	11	0	0	0	26	0	0	0	15	0	0	0	40	0	0	0	D_0__Bacteria	D_1__Proteobacteria	D_2__Deltaproteobacteria	D_3__Myxococcales	D_4__Sandaracinaceae	D_5__uncultured	D_6__uncultured bacterium
denovo10859	44	4	1	0	31	0	0	0	42	0	0	0	35	1	0	0	48	0	0	0	D_0__Bacteria	D_1__Proteobacteria	D_2__Betaproteobacteria	D_3__Nitrosomonadales	D_4__Nitrosomonadaceae	D_5__Nitrosomonas
denovo13008	44	4	2	1	24	1	0	0	39	0	1	0	47	0	0	0	47	0	0	0	D_0__Bacteria	D_1__Proteobacteria	D_2__Betaproteobacteria	D_3__Rhodocyclales	D_4__Rhodocyclaceae	D_5__Methyloversatilis	D_6__uncultured bacterium
denovo1626	44	21	5	4	55	5	1	0	37	2	1	0	59	2	0	0	41	0	0	0	D_0__Bacteria	D_1__Proteobacteria	D_2__Betaproteobacteria	D_3__Rhodocyclales	D_4__Rhodocyclaceae	D_5__Candidatus Accumulibacter
denovo11735	42	7	1	0	59	5	1	0	30	5	2	0	42	4	0	0	59	3	1	0	D_0__Bacteria	D_1__Proteobacteria	D_2__Alphaproteobacteria	D_3__Sphingomonadales	D_4__Sphingomonadaceae	D_5__Novosphingobium
denovo18593	42	3	0	0	38	0	0	0	35	1	0	0	29	0	0	0	44	2	0	0	D_0__Bacteria	D_1__Bacteroidetes	D_2__Sphingobacteriia	D_3__Sphingobacteriales	D_4__Saprospiraceae	D_5__uncultured
denovo377	42	1	0	0	49	0	0	0	55	1	0	0	53	0	0	0	53	0	0	0	D_0__Bacteria	D_1__Bacteroidetes	D_2__Flavobacteriia	D_3__Flavobacteriales	D_4__Flavobacteriaceae	D_5__Empedobacter	D_6__uncultured bacterium
denovo14409	41	2	0	0	91	0	0	0	53	3	2	0	85	2	0	0	34	4	0	0	D_0__Bacteria	D_1__Proteobacteria	D_2__Gammaproteobacteria	D_3__NKB5	D_4__uncultured bacterium	D_5__uncultured bacterium	D_6__uncultured bacterium
denovo16532	41	8	0	0	83	2	0	0	48	5	0	0	73	0	0	0	50	2	1	0	D_0__Bacteria	D_1__Proteobacteria	D_2__Alphaproteobacteria	D_3__Rhodospirillales	D_4__Rhodospirillaceae	D_5__Dongia
denovo1682	41	2	1	0	18	0	0	0	28	2	0	0	27	0	1	0	37	1	0	0	D_0__Bacteria	D_1__Bacteroidetes	D_2__Sphingobacteriia	D_3__Sphingobacteriales	D_4__Chitinophagaceae	D_5__Terrimonas	D_6__uncultured bacterium
denovo18174	41	1	0	0	75	0	0	0	37	0	0	0	40	0	0	0	46	0	0	0	D_0__Bacteria	D_1__Spirochaetae	D_2__Spirochaetes	D_3__Spirochaetales	D_4__Spirochaetaceae	D_5__Treponema 2	D_6__uncultured bacterium
denovo17116	40	2	0	0	29	0	0	0	25	0	0	0	25	0	0	0	31	0	0	0	D_0__Bacteria	D_1__Bacteroidetes	D_2__Sphingobacteriia	D_3__Sphingobacteriales	D_4__env.OPS 17	D_5__uncultured bacterium	D_6__uncultured bacterium
denovo5225	40	4	1	0	47	4	0	0	28	3	2	0	46	3	0	0	38	3	0	0	D_0__Bacteria	D_1__Firmicutes	D_2__Negativicutes	D_3__Selenomonadales	D_4__Acidaminococcaceae	D_5__Acidaminococcus	D_6__uncultured bacterium
denovo21249	38	2	0	1	36	1	0	0	33	2	0	0	29	0	0	0	25	0	0	0	D_0__Bacteria	D_1__Bacteroidetes	D_2__Bacteroidia	D_3__Bacteroidales	D_4__Porphyromonadaceae	D_5__Macellibacteroides	D_6__uncultured bacterium
denovo21878	38	9	0	0	53	0	0	0	26	0	0	0	44	0	0	0	38	0	0	0	D_0__Bacteria	D_1__Proteobacteria	D_2__Betaproteobacteria	D_3__Rhodocyclales	D_4__Rhodocyclaceae	D_5__Sulfuritalea
denovo4357	38	1	0	0	88	54	13	0	63	74	8	0	64	0	0	0	67	0	0	0	D_0__Bacteria	D_1__Bacteroidetes	D_2__Bacteroidia	D_3__Bacteroidales	D_4__Prevotellaceae	D_5__Prevotella 1	D_6__uncultured bacterium
denovo765	38	3	0	0	19	3	0	0	30	3	1	0	28	0	0	0	27	2	0	0	D_0__Bacteria	D_1__Proteobacteria	D_2__Betaproteobacteria	D_3__Rhodocyclales	D_4__Rhodocyclaceae	D_5__Propionivibrio	D_6__uncultured bacterium
denovo9680	38	1	0	0	31	2	0	0	21	0	0	0	34	0	0	0	28	2	1	0	D_0__Bacteria	D_1__Firmicutes	D_2__Clostridia	D_3__Clostridiales	D_4__Ruminococcaceae	D_5__Ruminococcus 2	D_6__uncultured bacterium
denovo12333	37	5	0	0	32	0	0	0	39	0	0	0	37	0	0	0	41	0	0	0	D_0__Bacteria	D_1__Proteobacteria	D_2__Gammaproteobacteria	D_3__Enterobacteriales	D_4__Enterobacteriaceae	D_5__Enterobacter
denovo16635	37	4	0	0	36	2	0	0	20	8	7	0	24	5	0	0	16	0	1	0	D_0__Bacteria	D_1__Firmicutes	D_2__Erysipelotrichia	D_3__Erysipelotrichales	D_4__Erysipelotrichaceae	D_5__Asteroleplasma	D_6__uncultured bacterium
denovo13725	35	1	0	0	15	5	0	0	19	0	0	0	18	0	1	0	19	2	0	0	D_0__Bacteria	D_1__Firmicutes	D_2__Bacilli	D_3__Lactobacillales	D_4__Streptococcaceae	D_5__Lactococcus	D_6__uncultured bacterium
denovo16615	35	12	2	0	20	0	2	1	40	2	1	0	36	1	0	0	56	1	2	1	D_0__Bacteria	D_1__Actinobacteria	D_2__Actinobacteria	D_3__Micrococcales	D_4__Intrasporangiaceae	D_5__Tetrasphaera
denovo19718	35	2	0	0	18	0	0	0	29	1	0	0	26	0	0	0	49	0	0	0	D_0__Bacteria	D_1__Proteobacteria	D_2__Alphaproteobacteria	D_3__DB1-14	D_4__uncultured bacterium	D_5__uncultured bacterium	D_6__uncultured bacterium
denovo5085	35	5	2	0	51	0	0	0	45	0	0	0	39	0	0	0	38	0	0	0	D_0__Bacteria	D_1__Proteobacteria	D_2__Betaproteobacteria	D_3__Rhodocyclales	D_4__Rhodocyclaceae
denovo3926	33	3	0	0	14	0	0	0	26	1	0	0	30	0	0	0	30	1	0	0	D_0__Bacteria	D_1__Proteobacteria	D_2__Gammaproteobacteria	D_3__Oceanospirillales	D_4__Halomonadaceae	D_5__Halomonas
denovo1562	32	2	0	1	49	0	0	0	41	1	0	0	35	1	0	0	31	0	0	0	D_0__Bacteria	D_1__Bacteroidetes	D_2__Flavobacteriia	D_3__Flavobacteriales	D_4__Flavobacteriaceae	D_5__Flavobacterium	D_6__uncultured bacterium
denovo1828	32	0	0	0	18	0	0	0	19	0	0	0	16	0	0	0	10	0	0	0	D_0__Bacteria	D_1__Proteobacteria	D_2__Gammaproteobacteria	D_3__Aeromonadales	D_4__Aeromonadaceae	D_5__Aeromonas
denovo19243	32	0	0	0	35	0	0	0	25	0	0	0	13	0	0	0	17	0	0	0	D_0__Bacteria	D_1__Bacteroidetes	D_2__Bacteroidia	D_3__Bacteroidales	D_4__Porphyromonadaceae	D_5__uncultured
denovo7132	32	0	0	0	23	0	0	0	17	0	0	0	21	0	0	0	29	0	0	1	D_0__Bacteria	D_1__Proteobacteria	D_2__Deltaproteobacteria	D_3__Myxococcales	D_4__Haliangiaceae	D_5__Haliangium
denovo8567	32	4	0	0	35	0	0	0	33	3	0	0	27	1	0	0	23	0	0	0	D_0__Bacteria	D_1__Bacteroidetes	D_2__Bacteroidia	D_3__Bacteroidales	D_4__Rikenellaceae	D_5__vadinBC27 wastewater-sludge group	D_6__uncultured bacterium
denovo20926	31	1	0	0	28	0	0	0	32	0	0	0	36	0	0	0	44	0	0	0	D_0__Bacteria	D_1__Bacteroidetes	D_2__Sphingobacteriia	D_3__Sphingobacteriales	D_4__Chitinophagaceae	D_5__Ferruginibacter	D_6__uncultured bacterium
denovo1858	30	0	0	0	17	0	0	0	27	0	0	0	20	0	0	0	30	0	0	0	D_0__Bacteria	D_1__Firmicutes	D_2__Clostridia	D_3__Clostridiales	D_4__Lachnospiraceae	D_5__Pseudobutyrivibrio	D_6__uncultured bacterium
denovo7147	30	4	0	0	8	0	0	1	17	0	0	0	3	0	0	0	9	0	0	0	D_0__Bacteria	D_1__Proteobacteria	D_2__Gammaproteobacteria	D_3__Pseudomonadales	D_4__Pseudomonadaceae	D_5__Pseudomonas
denovo10143	29	1	0	1	12	1	0	0	58	1	1	0	50	0	1	0	31	1	0	0	D_0__Bacteria	D_1__Proteobacteria	D_2__Betaproteobacteria	D_3__Burkholderiales	D_4__Comamonadaceae	D_5__Rhizobacter	D_6__uncultured bacterium
denovo13946	29	4	0	0	47	7	2	0	26	15	0	0	20	0	0	0	29	0	0	0	D_0__Bacteria	D_1__Bacteroidetes	D_2__Bacteroidia	D_3__Bacteroidales	D_4__uncultured	D_5__uncultured bacterium
denovo16656	29	6	0	0	4	0	0	0	10	0	0	0	3	0	0	0	28	0	0	0	D_0__Bacteria	D_1__Bacteroidetes	D_2__Sphingobacteriia	D_3__Sphingobacteriales	D_4__env.OPS 17	D_5__uncultured bacterium
denovo17233	29	1	1	0	7	0	0	0	10	0	0	0	6	0	0	0	24	0	0	0	D_0__Bacteria	D_1__Bacteroidetes	D_2__Sphingobacteriia	D_3__Sphingobacteriales	D_4__env.OPS 17	D_5__uncultured bacterium	D_6__uncultured bacterium
denovo18746	29	3	0	0	15	0	0	0	14	6	4	0	5	0	0	0	22	0	0	0	D_0__Bacteria	D_1__Firmicutes	D_2__Clostridia	D_3__Clostridiales	D_4__Ruminococcaceae	D_5__Ruminococcus 1
denovo16390	28	12	0	0	39	3	0	0	46	1	0	0	39	2	0	0	40	1	0	0	D_0__Bacteria	D_1__Bacteroidetes	D_2__Flavobacteriia	D_3__Flavobacteriales	D_4__Flavobacteriaceae	D_5__Chryseobacterium
denovo20603	28	1	0	0	8	0	0	0	9	0	0	0	7	0	0	0	16	0	0	0	D_0__Bacteria	D_1__Proteobacteria	D_2__Gammaproteobacteria	D_3__Pseudomonadales	D_4__Pseudomonadaceae	D_5__Pseudomonas	D_6__uncultured bacterium
denovo7867	28	2	0	0	22	1	1	0	23	3	1	0	22	0	0	0	29	3	0	0	D_0__Bacteria	D_1__Proteobacteria	D_2__Betaproteobacteria	D_3__Burkholderiales	D_4__Comamonadaceae		D_6__uncultured bacterium
denovo11109	27	1	1	0	6	0	0	0	20	2	0	0	18	1	0	0	24	1	0	0	D_0__Bacteria	D_1__Chlamydiae	D_2__Chlamydiae	D_3__Chlamydiales	D_4__Parachlamydiaceae	D_5__Neochlamydia
denovo11581	27	3	3	3	15	0	0	1	22	0	1	0	24	0	0	0	19	0	0	0	D_0__Bacteria	D_1__Proteobacteria	D_2__Betaproteobacteria	D_3__Rhodocyclales	D_4__Rhodocyclaceae	D_5__Candidatus Accumulibacter
denovo19604	27	5	0	0	34	2	0	0	27	5	1	0	26	2	0	0	20	0	1	0	D_0__Bacteria	D_1__Firmicutes	D_2__Negativicutes	D_3__Selenomonadales	D_4__Acidaminococcaceae	D_5__uncultured
denovo20381	27	0	0	0	25	0	0	0	18	0	0	0	13	0	0	0	15	0	0	0	D_0__Bacteria	D_1__Bacteroidetes	D_2__Sphingobacteriia	D_3__Sphingobacteriales	D_4__ST-12K33	D_5__uncultured bacterium	D_6__uncultured bacterium
denovo20899	27	0	1	1	23	0	0	0	19	0	0	0	17	0	0	0	18	0	0	0	D_0__Bacteria	D_1__Bacteroidetes	D_2__Sphingobacteriia	D_3__Sphingobacteriales	D_4__Saprospiraceae	D_5__uncultured
denovo14277	26	1	0	0	33	0	0	0	16	0	0	0	22	0	0	0	26	1	0	0	D_0__Bacteria	D_1__Bacteroidetes	D_2__Sphingobacteriia	D_3__Sphingobacteriales	D_4__PHOS-HE51	D_5__uncultured bacterium	D_6__uncultured bacterium
denovo17961	26	96	2	2	6	0	0	0	15	0	0	0	15	6	0	0	10	0	0	0	D_0__Bacteria	D_1__Bacteroidetes	D_2__Bacteroidia	D_3__Bacteroidales	D_4__Prevotellaceae	D_5__Prevotella 7	D_6__uncultured bacterium
denovo2033	26	0	0	0	24	0	0	0	20	0	0	0	24	0	0	0	25	1	0	0	D_0__Bacteria	D_1__Bacteroidetes	D_2__Bacteroidia	D_3__Bacteroidales	D_4__Prevotellaceae	D_5__Prevotella 1	D_6__uncultured bacterium
denovo21612	26	2	0	0	14	0	0	0	24	0	0	0	23	0	0	0	35	0	0	0	D_0__Bacteria	D_1__Bacteroidetes	D_2__Flavobacteriia	D_3__Flavobacteriales	D_4__Flavobacteriaceae	D_5__uncultured	D_6__uncultured bacterium
denovo14774	25	1	0	0	28	0	0	0	30	0	0	0	22	0	0	0	29	0	0	0	D_0__Bacteria	D_1__Bacteroidetes	D_2__Sphingobacteriia	D_3__Sphingobacteriales	D_4__Chitinophagaceae	D_5__Filimonas	D_6__uncultured bacterium
denovo16781	25	280	4	0	97	142	13	0	21	185	17	0	51	433	1751	146	28	341	5	0	D_0__Bacteria	D_1__Bacteroidetes	D_2__Bacteroidia	D_3__Bacteroidales	D_4__Prevotellaceae	D_5__uncultured
denovo2249	25	0	0	0	30	0	0	0	41	0	0	0	43	0	0	0	38	0	0	0	Unassigned						D_6__uncultured bacterium
denovo2896	25	1	0	0	20	2	0	0	31	2	0	0	16	2	0	0	24	0	1	1	D_0__Bacteria	D_1__Saccharibacteria	D_2__uncultured bacterium	D_3__uncultured bacterium	D_4__uncultured bacterium	D_5__uncultured bacterium	D_6__uncultured bacterium
denovo6644	25	1	0	0	16	2	1	0	15	2	0	0	24	0	0	0	28	2	0	0	D_0__Bacteria	D_1__Actinobacteria	D_2__Acidimicrobiia	D_3__Acidimicrobiales	D_4__Iamiaceae	D_5__Iamia
denovo7538	25	9	0	0	28	1	0	0	33	0	0	0	31	1	0	0	31	0	0	0	D_0__Bacteria	D_1__Proteobacteria	D_2__Betaproteobacteria	D_3__Burkholderiales	D_4__Comamonadaceae	D_5__Variovorax	D_6__uncultured bacterium
denovo10947	24	2	0	0	12	0	1	0	22	1	0	0	7	0	0	0	29	0	0	0	D_0__Bacteria	D_1__Proteobacteria	D_2__Gammaproteobacteria	D_3__Enterobacteriales	D_4__Enterobacteriaceae		D_6__uncultured bacterium
denovo5630	24	2	0	0	29	6	2	0	22	0	1	0	17	5	0	0	25	2	0	0	D_0__Bacteria	D_1__Saccharibacteria	D_2__uncultured bacterium	D_3__uncultured bacterium	D_4__uncultured bacterium	D_5__uncultured bacterium	D_6__uncultured bacterium
denovo5801	24	0	0	0	13	4	0	0	24	140	2	0	14	23	0	0	22	43	0	0	D_0__Bacteria	D_1__Bacteroidetes	D_2__Bacteroidia	D_3__Bacteroidales	D_4__Prevotellaceae	D_5__Prevotella 9	D_6__uncultured bacterium
denovo13973	23	4	0	0	28	0	0	0	27	4	0	0	23	1	0	0	32	2	0	0	D_0__Bacteria	D_1__Proteobacteria	D_2__Alphaproteobacteria	D_3__Rhizobiales	D_4__Rhizobiales Incertae Sedis	D_5__Rhizomicrobium	D_6__uncultured bacterium
denovo18645	23	4	0	0	15	1	0	0	18	0	0	0	13	0	0	0	10	3	0	1	D_0__Bacteria	D_1__Synergistetes	D_2__Synergistia	D_3__Synergistales	D_4__Synergistaceae	D_5__Thermovirga	D_6__uncultured bacterium
denovo19059	23	3	0	0	9	1	0	0	5	0	0	0	18	0	0	0	14	1	0	0	D_0__Bacteria	D_1__Proteobacteria	D_2__Gammaproteobacteria	D_3__Enterobacteriales	D_4__Enterobacteriaceae	D_5__Enterobacter	D_6__uncultured bacterium
denovo3700	23	3	1	0	14	0	1	0	14	1	2	0	8	5	0	0	25	3	0	0	D_0__Bacteria	D_1__Cyanobacteria	D_2__Melainabacteria	D_3__Obscuribacterales	D_4__uncultured bacterium	D_5__uncultured bacterium	D_6__uncultured beta proteobacterium
denovo12373	22	1	0	0	3	0	0	0	8	0	1	0	8	0	0	0	11	0	0	0	D_0__Bacteria	D_1__Bacteroidetes	D_2__Sphingobacteriia	D_3__Sphingobacteriales	D_4__Saprospiraceae	D_5__Haliscomenobacter
denovo18423	22	15	0	0	19	5	2	0	20	2	1	0	15	3	0	0	25	5	1	0	D_0__Bacteria	D_1__Proteobacteria	D_2__Alphaproteobacteria	D_3__Rhizobiales	D_4__Rhizobiaceae	D_5__Shinella
denovo295	22	5	0	0	20	4	1	1	10	9	3	0	15	7	3	0	18	3	0	1	D_0__Bacteria	D_1__Proteobacteria	D_2__Alphaproteobacteria	D_3__Sphingomonadales	D_4__Sphingomonadaceae	D_5__Novosphingobium	D_6__uncultured bacterium
denovo7727	22	8	0	0	12	0	0	1	20	0	0	0	18	1	0	0	13	0	0	0	D_0__Bacteria	D_1__Proteobacteria	D_2__Betaproteobacteria	D_3__Burkholderiales	D_4__Comamonadaceae	D_5__uncultured
denovo11160	21	2	0	0	20	0	0	0	9	0	0	0	6	0	0	0	14	0	0	0	D_0__Bacteria	D_1__Bacteroidetes	D_2__Bacteroidia	D_3__Bacteroidales	D_4__Rikenellaceae	D_5__vadinBC27 wastewater-sludge group	D_6__uncultured bacterium
denovo14946	21	0	0	0	39	0	0	0	59	0	0	0	34	0	0	0	42	0	0	0	D_0__Bacteria	D_1__Bacteroidetes	D_2__Flavobacteriia	D_3__Flavobacteriales	D_4__Flavobacteriaceae	D_5__Flavobacterium	D_6__uncultured bacterium
denovo4963	21	1	0	0	40	0	0	0	39	0	0	0	21	0	0	0	33	0	0	0	D_0__Bacteria	D_1__Bacteroidetes	D_2__Flavobacteriia	D_3__Flavobacteriales	D_4__Flavobacteriaceae	D_5__Flavobacterium	D_6__uncultured bacterium
denovo6390	21	3	0	0	20	0	0	0	35	0	0	0	25	0	0	0	19	0	0	0	D_0__Bacteria	D_1__Proteobacteria	D_2__Epsilonproteobacteria	D_3__Campylobacterales	D_4__Campylobacteraceae	D_5__Sulfurospirillum
denovo6593	21	0	0	0	17	0	0	0	12	0	0	0	7	0	0	0	12	0	0	0	D_0__Bacteria	D_1__Bacteroidetes	D_2__Bacteroidia	D_3__Bacteroidales	D_4__Bacteroidaceae	D_5__Bacteroides
denovo7769	21	8	0	0	28	4	3	0	26	1	1	0	32	1	0	0	37	1	2	0	D_0__Bacteria	D_1__Proteobacteria	D_2__Betaproteobacteria	D_3__Burkholderiales	D_4__Comamonadaceae	D_5__uncultured	D_6__uncultured bacterium
denovo15639	20	0	1	0	20	7	2	0	23	1	0	0	21	3	0	0	23	3	1	1	D_0__Bacteria	D_1__Actinobacteria	D_2__Actinobacteria	D_3__Micrococcales	D_4__Microbacteriaceae	D_5__Salinibacterium	D_6__uncultured bacterium
denovo17281	20	4	0	0	13	6	1	1	20	3	1	0	12	1	0	0	23	3	0	0	D_0__Bacteria	D_1__Proteobacteria	D_2__Alphaproteobacteria	D_3__Rhodospirillales	D_4__Rhodospirillaceae	D_5__AEGEAN-169 marine group	D_6__uncultured bacterium
denovo1804	20	3	0	0	17	0	0	0	19	1	0	0	18	1	0	0	21	0	0	0	D_0__Bacteria	D_1__Proteobacteria	D_2__Alphaproteobacteria	D_3__Rickettsiales	D_4__SM2D12	D_5__uncultured bacterium	D_6__uncultured bacterium
denovo18454	20	1	0	0	10	2	1	0	12	0	1	0	14	1	0	0	11	1	0	0	Unassigned						D_6__uncultured bacterium
denovo10593	19	1	0	0	15	0	0	0	10	0	0	0	12	0	0	0	12	0	0	0	D_0__Bacteria	D_1__Bacteroidetes	D_2__Cytophagia	D_3__Cytophagales	D_4__Cytophagaceae	D_5__Chryseolinea	D_6__uncultured bacterium
denovo11003	19	1	0	0	25	0	0	0	16	0	0	0	20	0	0	0	20	0	0	0	D_0__Bacteria	D_1__Proteobacteria	D_2__Gammaproteobacteria	D_3__Xanthomonadales	D_4__Xanthomonadales Incertae Sedis	D_5__Acidibacter
denovo11640	19	5	0	0	31	0	0	0	22	2	0	0	29	3	0	0	23	1	1	0	D_0__Bacteria	D_1__Proteobacteria	D_2__Betaproteobacteria	D_3__Burkholderiales			D_6__uncultured bacterium
denovo1604	19	0	0	0	14	0	0	0	18	0	0	0	8	0	0	0	17	0	0	0	D_0__Bacteria	D_1__Bacteroidetes	D_2__Sphingobacteriia	D_3__Sphingobacteriales	D_4__Saprospiraceae	D_5__uncultured	D_6__uncultured bacterium
denovo17225	19	0	0	0	14	0	0	0	17	0	0	0	18	0	0	0	19	0	0	0	D_0__Bacteria	D_1__Bacteroidetes	D_2__Bacteroidia	D_3__Bacteroidales	D_4__Prevotellaceae	D_5__Prevotella 1
denovo17272	19	1	0	0	16	0	0	0	27	0	1	0	34	1	0	0	18	1	0	0	D_0__Bacteria	D_1__Proteobacteria	D_2__Betaproteobacteria	D_3__Hydrogenophilales	D_4__Hydrogenophilaceae	D_5__uncultured	D_6__uncultured bacterium
denovo3997	19	1	0	0	7	0	0	0	5	0	0	0	10	0	0	0	26	0	0	0	D_0__Bacteria	D_1__Firmicutes	D_2__Negativicutes	D_3__Selenomonadales	D_4__Veillonellaceae	D_5__Pelosinus	D_6__uncultured bacterium
denovo6640	19	1	0	0	19	0	0	0	16	0	0	0	6	0	0	0	13	0	0	0	D_0__Bacteria	D_1__Bacteroidetes	D_2__Flavobacteriia	D_3__Flavobacteriales	D_4__NS9 marine group	D_5__uncultured Bacteroidetes bacterium	D_6__uncultured bacterium
denovo682	19	2	1	0	14	0	0	0	22	0	0	0	13	0	0	0	25	0	0	0	D_0__Bacteria	D_1__Bacteroidetes	D_2__Flavobacteriia	D_3__Flavobacteriales	D_4__NS9 marine group	D_5__uncultured bacterium
denovo8340	19	5	1	0	14	0	0	0	19	2	0	0	23	1	1	0	28	0	0	0	D_0__Bacteria	D_1__Proteobacteria	D_2__Gammaproteobacteria	D_3__Cellvibrionales	D_4__Halieaceae	D_5__OM60(NOR5) clade
denovo11942	18	2	0	0	32	3	0	0	15	1	3	0	19	1	0	0	13	1	0	0	D_0__Bacteria	D_1__Proteobacteria	D_2__Alphaproteobacteria	D_3__Rickettsiales	D_4__Holosporaceae	D_5__uncultured
denovo12432	18	1	0	0	2	0	0	0	9	0	0	0	5	0	0	0	4	0	0	0	D_0__Bacteria	D_1__Cloacimonetes	D_2__Cloacimonetes Incertae Sedis	D_3__Unknown Order	D_4__Unknown Family	D_5__Candidatus Cloacamonas	D_6__uncultured bacterium
denovo13165	18	4	1	0	23	0	0	0	22	0	0	0	15	0	0	0	16	0	0	0	D_0__Bacteria	D_1__Proteobacteria	D_2__Betaproteobacteria	D_3__Rhodocyclales	D_4__Rhodocyclaceae	D_5__Sulfuritalea	D_6__uncultured bacterium
denovo142	18	0	0	0	11	0	0	0	13	0	0	0	9	0	0	0	20	0	0	0	D_0__Bacteria	D_1__Bacteroidetes	D_2__Flavobacteriia	D_3__Flavobacteriales	D_4__Flavobacteriaceae	D_5__Flavobacterium
denovo14457	18	1	0	0	7	0	0	0	12	1	0	0	15	0	0	0	13	0	0	0	D_0__Bacteria	D_1__Proteobacteria	D_2__Gammaproteobacteria	D_3__Pseudomonadales	D_4__Pseudomonadaceae	D_5__Pseudomonas	D_6__uncultured bacterium
denovo17493	18	3	0	0	14	2	1	1	24	0	0	0	17	0	0	0	27	1	0	0	D_0__Bacteria	D_1__Proteobacteria	D_2__Deltaproteobacteria	D_3__Bdellovibrionales	D_4__Bdellovibrionaceae	D_5__Bdellovibrio
denovo20286	18	4	0	0	16	0	0	0	15	0	0	0	8	0	0	0	22	0	0	0	D_0__Bacteria	D_1__Proteobacteria	D_2__Deltaproteobacteria	D_3__Bdellovibrionales	D_4__Bacteriovoracaceae	D_5__Bacteriovorax
denovo2489	18	0	0	0	14	0	0	0	16	1	0	0	14	0	0	0	19	0	0	0	D_0__Bacteria	D_1__Proteobacteria	D_2__Alphaproteobacteria	D_3__Caulobacterales	D_4__Caulobacteraceae	D_5__Brevundimonas	D_6__uncultured bacterium
denovo3120	18	0	0	0	17	0	0	0	14	0	0	0	6	0	0	0	21	0	0	0	D_0__Bacteria	D_1__Chloroflexi	D_2__Caldilineae	D_3__Caldilineales	D_4__Caldilineaceae	D_5__uncultured
denovo5725	18	1	0	0	13	1	0	0	10	1	0	0	15	0	0	0	7	0	0	0	D_0__Bacteria	D_1__Proteobacteria	D_2__Betaproteobacteria
denovo7482	18	0	0	0	4	0	0	0	7	0	0	0	1	0	0	0	2	0	0	0	D_0__Bacteria	D_1__Bacteroidetes	D_2__Flavobacteriia	D_3__Flavobacteriales	D_4__Flavobacteriaceae	D_5__Lutibacter
denovo12506	17	12	0	0	10	8	5	0	12	3	4	0	11	4	0	0	18	3	2	0	D_0__Bacteria	D_1__Proteobacteria	D_2__Gammaproteobacteria	D_3__Xanthomonadales	D_4__Xanthomonadaceae	D_5__Pseudoxanthomonas	D_6__uncultured bacterium
denovo13785	17	1	0	0	16	2	0	0	8	2	0	0	14	0	0	0	13	0	0	0	D_0__Bacteria	D_1__Saccharibacteria	D_2__uncultured bacterium	D_3__uncultured bacterium	D_4__uncultured bacterium	D_5__uncultured bacterium	D_6__uncultured bacterium
denovo13901	17	0	1	1	15	0	0	1	13	0	0	0	7	0	0	0	6	0	0	0	D_0__Bacteria	D_1__Proteobacteria	D_2__Deltaproteobacteria	D_3__Myxococcales	D_4__Nannocystaceae	D_5__Nannocystis
denovo18436	17	4	0	0	14	0	0	0	12	0	0	0	13	0	0	0	4	0	0	0	D_0__Bacteria	D_1__Bacteroidetes	D_2__Sphingobacteriia	D_3__Sphingobacteriales	D_4__Chitinophagaceae	D_5__Ferruginibacter	D_6__uncultured bacterium
denovo18641	17	0	0	0	19	0	0	0	16	1	0	0	14	0	0	0	19	0	0	0	D_0__Bacteria	D_1__Bacteroidetes	D_2__Flavobacteriia	D_3__Flavobacteriales	D_4__Flavobacteriaceae	D_5__Flavobacterium
denovo18939	17	4	3	0	17	0	0	0	21	2	1	0	8	0	0	0	7	0	0	0	D_0__Bacteria	D_1__Cloacimonetes	D_2__Cloacimonetes Incertae Sedis	D_3__Unknown Order	D_4__Unknown Family	D_5__Candidatus Cloacamonas	D_6__uncultured bacterium
denovo2046	17	1	0	0	29	0	0	0	26	1	0	0	23	0	0	0	23	0	0	0	D_0__Bacteria	D_1__Bacteroidetes	D_2__Flavobacteriia	D_3__Flavobacteriales	D_4__Flavobacteriaceae	D_5__Flavobacterium
denovo21261	17	3	0	1	20	2	1	0	10	1	1	0	12	0	0	0	15	1	0	0	D_0__Bacteria	D_1__Proteobacteria	D_2__Alphaproteobacteria	D_3__Rhizobiales	D_4__JG35-K1-AG5	D_5__uncultured bacterium	D_6__uncultured bacterium
denovo3795	17	0	0	0	10	0	0	0	7	0	0	0	6	0	0	0	14	0	0	0	D_0__Bacteria	D_1__Bacteroidetes	D_2__Bacteroidetes VC2.1 Bac22	D_3__uncultured bacterium	D_4__uncultured bacterium	D_5__uncultured bacterium	D_6__uncultured bacterium
denovo5334	17	1	0	0	2	0	0	0	4	0	0	0	13	0	0	0	0	0	0	0	D_0__Bacteria	D_1__Firmicutes	D_2__Clostridia	D_3__Clostridiales	D_4__Lachnospiraceae
denovo5414	17	8	0	0	27	1	2	0	20	0	0	0	13	1	0	0	28	0	0	0	D_0__Bacteria	D_1__Proteobacteria	D_2__Betaproteobacteria	D_3__Rhodocyclales	D_4__Rhodocyclaceae	D_5__Dechloromonas	D_6__uncultured bacterium
denovo714	17	1	0	0	8	0	0	0	25	3	0	0	17	1	0	0	25	0	0	0	D_0__Bacteria	D_1__Lentisphaerae	D_2__Lentisphaerae RFP12 gut group	D_3__uncultured bacterium	D_4__uncultured bacterium	D_5__uncultured bacterium
denovo7596	17	6	2	0	23	1	0	0	15	0	0	0	7	1	0	0	10	0	0	0	D_0__Bacteria	D_1__Proteobacteria	D_2__Betaproteobacteria	D_3__Rhodocyclales	D_4__Rhodocyclaceae	D_5__uncultured
denovo11129	16	0	0	0	6	0	0	0	8	0	0	0	5	0	0	0	13	0	0	0	D_0__Bacteria	D_1__Proteobacteria	D_2__Betaproteobacteria	D_3__Burkholderiales	D_4__Comamonadaceae	D_5__uncultured
denovo1256	16	1	0	0	12	0	0	0	8	0	0	0	10	0	1	0	13	98	396	131	D_0__Bacteria	D_1__Bacteroidetes	D_2__Bacteroidia	D_3__Bacteroidales	D_4__Bacteroidaceae	D_5__Bacteroides	D_6__uncultured bacterium
denovo13330	16	0	0	0	60	0	0	0	22	0	0	0	7	0	0	0	13	0	0	0	D_0__Bacteria	D_1__Spirochaetae	D_2__Spirochaetes	D_3__Spirochaetales	D_4__Spirochaetaceae	D_5__Treponema 2
denovo13349	16	0	0	0	10	0	0	0	4	0	0	0	6	0	0	0	11	0	0	0	Unassigned
denovo15282	16	7	1	1	15	6	3	0	7	1	2	0	17	2	0	0	13	2	0	0	D_0__Bacteria	D_1__Proteobacteria	D_2__Betaproteobacteria	D_3__Burkholderiales	D_4__Burkholderiaceae	D_5__Lautropia	D_6__uncultured bacterium
denovo15787	16	0	0	0	18	0	0	0	18	0	0	0	16	0	0	0	25	0	0	0	D_0__Bacteria	D_1__Bacteroidetes	D_2__Sphingobacteriia	D_3__Sphingobacteriales	D_4__Chitinophagaceae	D_5__uncultured
denovo21428	16	0	0	0	6	0	0	0	7	0	0	0	8	0	0	0	14	0	0	0	D_0__Bacteria	D_1__Bacteroidetes	D_2__Sphingobacteriia	D_3__Sphingobacteriales	D_4__Chitinophagaceae	D_5__uncultured
denovo21831	16	0	0	0	10	0	0	0	16	1	0	0	7	0	0	0	8	0	0	0	D_0__Bacteria	D_1__Proteobacteria	D_2__Deltaproteobacteria	D_3__Desulfovibrionales	D_4__Desulfomicrobiaceae	D_5__Desulfomicrobium	D_6__uncultured bacterium
denovo4427	16	1	1	0	5	0	0	0	15	0	1	0	8	1	0	0	15	0	0	0	D_0__Bacteria	D_1__Proteobacteria	D_2__Alphaproteobacteria	D_3__Rhodospirillales	D_4__Rhodospirillaceae	D_5__Dongia
denovo6122	16	3	0	0	20	0	0	0	23	1	0	0	35	0	0	0	35	0	0	0	D_0__Bacteria	D_1__Proteobacteria	D_2__Alphaproteobacteria	D_3__Caulobacterales	D_4__Hyphomonadaceae	D_5__Hyphomonas	D_6__uncultured bacterium
denovo7871	16	1	0	0	24	0	0	0	19	0	0	0	16	0	0	0	14	0	0	0	D_0__Bacteria	D_1__Bacteroidetes	D_2__Flavobacteriia	D_3__Flavobacteriales	D_4__Flavobacteriaceae	D_5__Flavobacterium
denovo10832	15	0	0	0	10	0	0	0	5	0	0	0	7	0	0	0	8	0	0	0	D_0__Bacteria	D_1__Bacteroidetes	D_2__Sphingobacteriia	D_3__Sphingobacteriales	D_4__NS11-12 marine group	D_5__uncultured bacterium
denovo14512	15	2	0	0	10	0	0	0	7	4	0	0	4	0	0	0	2	1	0	0	D_0__Bacteria	D_1__Bacteroidetes	D_2__Bacteroidia	D_3__Bacteroidales	D_4__Rikenellaceae	D_5__vadinBC27 wastewater-sludge group	D_6__uncultured bacterium
denovo14563	15	2	0	0	3	0	0	0	3	1	0	0	7	0	0	0	12	0	0	0	D_0__Bacteria	D_1__Verrucomicrobia	D_2__Verrucomicrobiae	D_3__Verrucomicrobiales	D_4__Verrucomicrobiaceae	D_5__Verrucomicrobium
denovo1642	15	0	0	0	10	0	0	0	10	0	0	0	10	0	0	0	10	0	0	0	D_0__Bacteria	D_1__Proteobacteria	D_2__Gammaproteobacteria	D_3__Xanthomonadales	D_4__Xanthomonadaceae	D_5__uncultured
denovo17311	15	2	0	0	8	1	0	0	4	1	0	0	65	4	1	0	18	0	0	0	D_0__Bacteria	D_1__Proteobacteria	D_2__Betaproteobacteria	D_3__Burkholderiales	D_4__Comamonadaceae	D_5__Comamonas	D_6__uncultured bacterium
denovo17723	15	2	0	0	17	0	0	0	10	2	0	0	16	0	0	0	15	9	0	0	D_0__Bacteria	D_1__Firmicutes	D_2__Clostridia	D_3__Clostridiales	D_4__Ruminococcaceae	D_5__Faecalibacterium	D_6__uncultured bacterium
denovo20098	15	2	0	0	17	0	0	0	13	4	1	0	11	0	0	0	19	0	0	0	D_0__Bacteria	D_1__Proteobacteria	D_2__Gammaproteobacteria	D_3__Cellvibrionales	D_4__Spongiibacteraceae	D_5__BD1-7 clade	D_6__uncultured bacterium
denovo21283	15	0	0	0	6	0	0	0	14	0	0	0	11	0	0	0	9	0	0	0	D_0__Bacteria	D_1__Spirochaetae	D_2__Spirochaetes	D_3__Spirochaetales	D_4__Leptospiraceae	D_5__Turneriella
denovo2981	15	3	1	0	14	0	0	0	12	0	0	0	9	0	0	0	17	0	0	0	D_0__Bacteria	D_1__Bacteroidetes	D_2__Flavobacteriia	D_3__Flavobacteriales	D_4__Flavobacteriaceae	D_5__Chryseobacterium
denovo507	15	0	0	0	2	0	0	0	8	0	0	0	2	0	0	0	0	0	0	0	D_0__Bacteria	D_1__Tenericutes	D_2__Mollicutes	D_3__Acholeplasmatales	D_4__Acholeplasmataceae	D_5__Acholeplasma	D_6__uncultured bacterium
denovo7885	15	1	0	0	23	18	3	0	15	6	4	0	23	4	0	0	18	12	1	3	D_0__Bacteria	D_1__Synergistetes	D_2__Synergistia	D_3__Synergistales	D_4__Synergistaceae	D_5__uncultured
denovo9044	15	2	0	0	5	0	0	0	3	0	0	0	0	0	0	0	8	0	0	0	D_0__Bacteria	D_1__Proteobacteria	D_2__Gammaproteobacteria	D_3__NKB5	D_4__uncultured bacterium	D_5__uncultured bacterium	D_6__uncultured bacterium
denovo9831	15	2	0	0	12	2	0	0	10	1	0	0	11	0	1	0	8	0	0	0	D_0__Bacteria	D_1__Firmicutes	D_2__Negativicutes	D_3__Selenomonadales	D_4__Veillonellaceae	D_5__uncultured	D_6__uncultured bacterium
denovo12590	14	1	0	0	7	0	0	0	14	0	0	0	13	0	0	0	9	0	0	0	D_0__Bacteria	D_1__Proteobacteria	D_2__Deltaproteobacteria	D_3__Desulfobacterales	D_4__Desulfobulbaceae	D_5__Desulfobulbus
denovo15403	14	1	0	0	7	1	0	0	8	1	0	0	12	0	0	0	6	1	0	0	D_0__Bacteria	D_1__Bacteroidetes	D_2__Bacteroidia	D_3__Bacteroidales	D_4__Porphyromonadaceae	D_5__Dysgonomonas
denovo16393	14	0	0	0	14	1	0	0	10	1	0	0	6	0	0	0	9	0	0	0	D_0__Bacteria	D_1__Cloacimonetes	D_2__W5	D_3__uncultured bacterium	D_4__uncultured bacterium	D_5__uncultured bacterium
denovo16542	14	1	0	0	6	0	0	0	9	0	0	0	10	0	0	0	15	2	1	0	D_0__Bacteria	D_1__Proteobacteria	D_2__Betaproteobacteria	D_3__Burkholderiales	D_4__Comamonadaceae
denovo20850	14	73	2	0	8	9	2	868	6	41	6	0	9	43	35	7	9	7	2	0	D_0__Bacteria	D_1__Bacteroidetes	D_2__Bacteroidia	D_3__Bacteroidales	D_4__Prevotellaceae	D_5__Prevotella 7
denovo3377	14	3	1	0	16	0	0	0	19	0	0	0	14	0	0	0	22	0	0	0	D_0__Bacteria	D_1__Proteobacteria	D_2__Betaproteobacteria	D_3__Burkholderiales	D_4__Comamonadaceae	D_5__Variovorax
denovo8843	14	1	0	0	6	0	0	0	7	0	0	0	8	0	0	0	6	0	0	0	D_0__Bacteria	D_1__Proteobacteria	D_2__Deltaproteobacteria	D_3__Desulfuromonadales	D_4__BVA18	D_5__uncultured bacterium
denovo9047	14	3	1	0	15	5	0	0	10	0	0	0	12	0	0	0	21	0	0	0	D_0__Bacteria	D_1__Actinobacteria	D_2__Acidimicrobiia	D_3__Acidimicrobiales	D_4__Acidimicrobiaceae	D_5__CL500-29 marine group	D_6__uncultured bacterium
denovo9964	14	3	0	0	9	0	0	0	14	0	0	0	11	0	0	0	12	0	0	0	D_0__Bacteria	D_1__Proteobacteria	D_2__Betaproteobacteria	D_3__Burkholderiales	D_4__Comamonadaceae	D_5__Caenimonas
denovo1247	13	2	0	0	12	0	0	0	15	0	0	0	11	0	0	0	12	0	0	0	D_0__Bacteria	D_1__Proteobacteria	D_2__Betaproteobacteria	D_3__Rhodocyclales	D_4__Rhodocyclaceae	D_5__Sulfuritalea	D_6__uncultured bacterium
denovo13045	13	2	2	0	13	0	0	0	11	0	0	0	11	0	0	0	30	0	0	0	D_0__Bacteria	D_1__Proteobacteria	D_2__Gammaproteobacteria	D_3__Xanthomonadales	D_4__uncultured	D_5__uncultured bacterium
denovo14169	13	1	0	0	8	1	0	0	4	0	0	0	7	0	0	0	7	0	0	0	D_0__Bacteria	D_1__Firmicutes	D_2__Bacilli	D_3__Lactobacillales	D_4__Streptococcaceae	D_5__Streptococcus	D_6__uncultured bacterium
denovo1602	13	2	1	0	7	0	1	0	5	0	1	0	11	0	0	0	14	0	0	0	D_0__Bacteria	D_1__Proteobacteria	D_2__Betaproteobacteria	D_3__Neisseriales	D_4__Neisseriaceae	D_5__Laribacter
denovo19174	13	1	2	0	13	0	0	0	10	0	0	0	10	0	0	0	14	0	0	0	D_0__Bacteria	D_1__Proteobacteria	D_2__Deltaproteobacteria	D_3__Myxococcales	D_4__Haliangiaceae	D_5__Haliangium
denovo19190	13	3	0	0	8	0	0	0	16	0	0	0	6	0	0	0	6	0	0	0	D_0__Bacteria	D_1__Bacteroidetes	D_2__Sphingobacteriia	D_3__Sphingobacteriales	D_4__NS11-12 marine group	D_5__uncultured bacterium	D_6__uncultured bacterium
denovo19432	13	3	3	0	10	3	0	1	6	1	0	0	7	9	3	3	11	2124	1508	746	D_0__Bacteria	D_1__Bacteroidetes	D_2__Bacteroidia	D_3__Bacteroidales	D_4__Porphyromonadaceae	D_5__Parabacteroides
denovo20343	13	11	1	0	29	11	1	0	23	0	0	0	35	3	0	1	20	9	1	1	D_0__Bacteria	D_1__Actinobacteria	D_2__Actinobacteria	D_3__Corynebacteriales	D_4__Mycobacteriaceae	D_5__Mycobacterium
denovo2657	13	1	0	0	8	0	0	0	12	0	0	0	11	2	0	0	3	0	0	0	D_0__Bacteria	D_1__Proteobacteria	D_2__Betaproteobacteria	D_3__Rhodocyclales	D_4__Rhodocyclaceae	D_5__Propionivibrio
denovo3538	13	0	0	0	3	1	0	0	6	1	0	0	12	1	0	0	7	0	0	0	D_0__Bacteria	D_1__Firmicutes	D_2__Negativicutes	D_3__Selenomonadales	D_4__Veillonellaceae	D_5__Anaerosinus	D_6__uncultured bacterium
denovo3626	13	1	0	0	13	0	0	0	16	0	0	0	10	1	0	0	12	428	9	0	D_0__Bacteria	D_1__Firmicutes	D_2__Clostridia	D_3__Clostridiales	D_4__Lachnospiraceae	D_5__Blautia	D_6__uncultured bacterium
denovo5927	13	0	0	0	8	0	0	0	11	0	0	0	9	0	0	0	14	0	0	0	D_0__Bacteria	D_1__Proteobacteria	D_2__Deltaproteobacteria	D_3__Myxococcales	D_4__mle1-27	D_5__uncultured bacterium	D_6__uncultured bacterium
denovo6171	13	3	0	0	24	7	2	1	24	6	1	0	9	1	0	0	22	4	0	2	D_0__Bacteria	D_1__Saccharibacteria	D_2__uncultured bacterium	D_3__uncultured bacterium	D_4__uncultured bacterium	D_5__uncultured bacterium
denovo6226	13	1	0	0	1	0	0	0	1	0	0	0	9	0	0	0	8	0	0	0	D_0__Bacteria	D_1__SHA-109	D_2__uncultured bacterium	D_3__uncultured bacterium	D_4__uncultured bacterium	D_5__uncultured bacterium
denovo9217	13	0	0	0	0	0	0	0	45	0	0	0	3	0	0	0	35	0	0	0	D_0__Bacteria	D_1__Spirochaetae	D_2__Spirochaetes	D_3__Spirochaetales	D_4__Spirochaetaceae	D_5__Treponema 2	D_6__uncultured bacterium
denovo10425	12	4	0	0	17	1	0	0	12	2	0	0	13	0	0	0	11	1	0	0	D_0__Bacteria	D_1__Proteobacteria	D_2__Betaproteobacteria	D_3__Rhodocyclales	D_4__Rhodocyclaceae	D_5__Propionivibrio	D_6__uncultured bacterium
denovo10630	12	0	1	0	11	0	0	0	9	0	0	0	6	0	0	0	13	0	0	0	D_0__Bacteria	D_1__Proteobacteria	D_2__Gammaproteobacteria	D_3__Aeromonadales	D_4__Aeromonadaceae	D_5__Tolumonas	D_6__uncultured bacterium
denovo11086	12	1	0	1	11	0	0	0	8	0	0	0	16	0	0	1	15	0	0	1	D_0__Bacteria	D_1__Bacteroidetes	D_2__Cytophagia	D_3__Cytophagales	D_4__Cytophagaceae	D_5__uncultured
denovo1536	12	1	0	0	5	1	0	1	8	0	1	0	9	0	0	0	16	3	3	0	D_0__Bacteria	D_1__Actinobacteria	D_2__Actinobacteria	D_3__Actinomycetales	D_4__Actinomycetaceae	D_5__Actinomyces
denovo17545	12	0	0	0	7	0	0	0	13	0	0	0	8	0	0	0	14	0	0	0	D_0__Bacteria	D_1__Proteobacteria	D_2__Gammaproteobacteria	D_3__Methylococcales	D_4__Crenotrichaceae	D_5__Crenothrix
denovo18683	12	0	0	0	6	0	0	0	11	0	0	0	14	0	0	0	2	0	0	0	D_0__Bacteria	D_1__Proteobacteria	D_2__Gammaproteobacteria	D_3__Pseudomonadales	D_4__Moraxellaceae	D_5__Acinetobacter	D_6__uncultured bacterium
denovo20065	12	2	0	0	19	0	0	0	10	0	0	0	13	0	0	0	11	0	0	0	D_0__Bacteria	D_1__Proteobacteria	D_2__Alphaproteobacteria	D_3__Caulobacterales	D_4__Hyphomonadaceae	D_5__Woodsholea	D_6__uncultured rumen bacterium
denovo2049	12	1	0	0	18	1	0	0	12	0	0	0	25	0	0	0	20	0	0	0	D_0__Bacteria	D_1__Bacteroidetes	D_2__Sphingobacteriia	D_3__Sphingobacteriales	D_4__Chitinophagaceae	D_5__Ferruginibacter
denovo20496	12	1	1	0	13	1	0	0	9	0	0	0	5	2	0	0	3	1	0	0	D_0__Bacteria	D_1__Proteobacteria	D_2__Gammaproteobacteria	D_3__Pseudomonadales	D_4__Moraxellaceae	D_5__Acinetobacter	D_6__uncultured bacterium
denovo21147	12	0	0	0	1	0	0	0	1	0	0	0	7	0	0	0	1	0	0	0	D_0__Bacteria	D_1__Firmicutes	D_2__Negativicutes	D_3__Selenomonadales	D_4__Veillonellaceae	D_5__Dendrosporobacter	D_6__uncultured bacterium
denovo21293	12	2	1	0	14	3	2	1	9	1	1	0	22	1	0	0	11	0	1	0	D_0__Bacteria	D_1__Proteobacteria	D_2__Betaproteobacteria	D_3__Neisseriales	D_4__Neisseriaceae	D_5__Leeia	D_6__uncultured bacterium
denovo10346	11	3	0	0	3	2	0	0	5	0	0	0	9	0	0	0	4	0	0	0	D_0__Bacteria	D_1__Proteobacteria	D_2__Betaproteobacteria	D_3__Burkholderiales	D_4__Comamonadaceae	D_5__Comamonas	D_6__uncultured bacterium
denovo11304	11	7	0	0	9	0	0	0	21	0	1	0	7	0	0	0	10	1	0	0	D_0__Bacteria	D_1__Bacteroidetes	D_2__Flavobacteriia	D_3__Flavobacteriales	D_4__Flavobacteriaceae	D_5__Chryseobacterium
denovo13638	11	0	0	0	9	0	0	0	10	0	0	0	12	0	0	0	17	0	0	0	D_0__Bacteria	D_1__Proteobacteria	D_2__Deltaproteobacteria	D_3__Myxococcales	D_4__mle1-27	D_5__uncultured delta proteobacterium
denovo14892	11	1	0	0	5	0	0	0	7	0	0	0	2	0	0	0	8	0	0	0	D_0__Bacteria	D_1__Bacteroidetes	D_2__Sphingobacteriia	D_3__Sphingobacteriales	D_4__Chitinophagaceae	D_5__Taibaiella
denovo15764	11	6	0	0	7	6	1	0	6	4	3	0	12	1	0	0	15	7	4	1	D_0__Bacteria	D_1__Synergistetes	D_2__Synergistia	D_3__Synergistales	D_4__Synergistaceae	D_5__uncultured	D_6__uncultured bacterium
denovo17632	11	0	0	0	23	0	0	0	10	1	0	0	16	0	0	0	13	0	0	0	D_0__Bacteria	D_1__Bacteroidetes	D_2__Sphingobacteriia	D_3__Sphingobacteriales	D_4__Saprospiraceae	D_5__uncultured	D_6__Proteus mirabilis
denovo17638	11	0	0	0	1	0	0	0	2	0	0	0	2	0	0	0	4	1	0	0	D_0__Bacteria	D_1__Saccharibacteria	D_2__uncultured bacterium	D_3__uncultured bacterium	D_4__uncultured bacterium	D_5__uncultured bacterium	D_6__uncultured bacterium
denovo18499	11	3	0	0	10	2	1	1	13	1	0	0	9	1	0	0	21	2	0	0	Unassigned						D_6__uncultured bacterium
denovo19841	11	3	0	0	6	0	0	0	7	0	0	0	5	0	0	0	10	0	0	0	D_0__Bacteria	D_1__Proteobacteria	D_2__Gammaproteobacteria	D_3__Pseudomonadales	D_4__Pseudomonadaceae	D_5__Pseudomonas	D_6__uncultured bacterium
denovo21572	11	3	0	0	15	6	1	0	8	2	1	0	19	5	2	0	10	1	0	1	D_0__Bacteria	D_1__Proteobacteria	D_2__Alphaproteobacteria	D_3__Caulobacterales	D_4__Caulobacteraceae		D_6__uncultured bacterium
denovo21991	11	1	1	0	1	0	0	0	2	0	0	0	7	0	0	0	4	0	1	0	D_0__Bacteria	D_1__Proteobacteria	D_2__Betaproteobacteria	D_3__Nitrosomonadales	D_4__Gallionellaceae	D_5__Candidatus Nitrotoga	D_6__uncultured bacterium
denovo6708	11	3	0	0	7	0	0	0	9	3	1	0	13	2	0	0	16	0	0	0	D_0__Bacteria	D_1__Planctomycetes	D_2__Phycisphaerae	D_3__Phycisphaerales	D_4__Phycisphaeraceae	D_5__SM1A02
denovo751	11	0	0	0	4	0	0	0	8	0	0	0	7	0	0	0	9	0	0	0	D_0__Bacteria	D_1__Bacteroidetes	D_2__Flavobacteriia	D_3__Flavobacteriales	D_4__Cryomorphaceae	D_5__Crocinitomix	D_6__uncultured bacterium
denovo9486	11	1	0	0	13	0	0	0	17	1	0	0	22	0	0	0	12	0	0	0	D_0__Bacteria	D_1__Fusobacteria	D_2__Fusobacteriia	D_3__Fusobacteriales	D_4__Leptotrichiaceae	D_5__uncultured
denovo10107	10	0	0	0	1	0	0	0	1	1	0	0	0	0	0	0	1	0	0	0	D_0__Bacteria	D_1__Bacteroidetes	D_2__Bacteroidia	D_3__Bacteroidia Incertae Sedis	D_4__Draconibacteriaceae	D_5__uncultured	D_6__uncultured organism
denovo10202	10	1	0	0	12	0	1	0	5	0	0	0	13	0	0	0	13	0	0	0	D_0__Bacteria	D_1__Proteobacteria	D_2__Deltaproteobacteria	D_3__Bdellovibrionales	D_4__Bdellovibrionaceae	D_5__Bdellovibrio	D_6__uncultured bacterium
denovo10249	10	0	0	0	3	0	0	0	3	0	0	0	2	0	0	0	3	0	0	0	D_0__Bacteria	D_1__Bacteroidetes	D_2__Sphingobacteriia	D_3__Sphingobacteriales	D_4__Saprospiraceae	D_5__uncultured	D_6__uncultured bacterium
denovo13444	10	2	1	0	25	2	0	0	12	8	1	0	10	0	0	0	10	0	0	0	D_0__Bacteria	D_1__Bacteroidetes	D_2__Bacteroidia	D_3__Bacteroidales	D_4__uncultured	D_5__uncultured bacterium	D_6__uncultured bacterium
denovo15768	10	2	1	0	8	1	0	0	10	0	1	0	16	0	0	0	7	2	0	0	D_0__Bacteria	D_1__Actinobacteria	D_2__Actinobacteria	D_3__PeM15	D_4__uncultured bacterium	D_5__uncultured bacterium	D_6__uncultured bacterium
denovo15840	10	1	0	0	18	6	3	1	7	0	0	0	7	2	0	0	9	0	1	0	D_0__Bacteria	D_1__Proteobacteria	D_2__Betaproteobacteria	D_3__Burkholderiales	D_4__Comamonadaceae
denovo1601	10	0	0	0	5	0	0	0	8	0	0	0	5	0	0	0	6	0	0	0	D_0__Bacteria	D_1__Bacteroidetes	D_2__Bacteroidia	D_3__Bacteroidales	D_4__Porphyromonadaceae	D_5__uncultured	D_6__uncultured bacterium
denovo17631	10	1	1	0	5	0	0	0	12	0	0	0	11	0	0	0	4	0	0	0	D_0__Bacteria	D_1__Proteobacteria	D_2__Betaproteobacteria	D_3__Rhodocyclales	D_4__Rhodocyclaceae	D_5__Thauera
denovo19335	10	5	1	0	10	2	0	0	10	0	0	0	5	0	0	0	10	0	0	1	D_0__Bacteria	D_1__Proteobacteria	D_2__Betaproteobacteria	D_3__Burkholderiales	D_4__Burkholderiaceae	D_5__Lautropia
denovo19343	10	1	0	0	6	0	0	0	6	0	0	0	5	0	0	0	5	0	0	0	D_0__Bacteria	D_1__Proteobacteria	D_2__Gammaproteobacteria	D_3__Xanthomonadales	D_4__Xanthomonadales Incertae Sedis	D_5__Acidibacter	D_6__uncultured bacterium
denovo21308	10	3	0	0	18	1	0	0	10	2	0	0	12	0	0	0	14	0	0	0	D_0__Bacteria	D_1__Hydrogenedentes	D_2__uncultured bacterium	D_3__uncultured bacterium	D_4__uncultured bacterium	D_5__uncultured bacterium	D_6__uncultured bacterium
denovo2727	10	1	0	0	4	0	0	0	4	1	0	0	7	0	0	0	1	1	0	0	D_0__Bacteria	D_1__Firmicutes	D_2__Clostridia	D_3__Clostridiales	D_4__Ruminococcaceae	D_5__Ruminococcaceae UCG-014
denovo3524	10	1	0	0	21	0	0	0	9	0	0	0	17	0	0	0	9	0	0	0	D_0__Bacteria	D_1__Bacteroidetes	D_2__Sphingobacteriia	D_3__Sphingobacteriales	D_4__AKYH767		D_6__uncultured bacterium
denovo5265	10	0	0	0	6	0	1	0	10	0	0	0	7	0	0	0	12	0	0	0	D_0__Bacteria	D_1__Firmicutes	D_2__Clostridia	D_3__Clostridiales	D_4__Ruminococcaceae	D_5__Subdoligranulum	D_6__uncultured bacterium
denovo5928	10	0	0	0	8	0	0	0	13	0	0	0	11	0	0	0	7	0	0	0	D_0__Bacteria	D_1__Proteobacteria	D_2__Gammaproteobacteria	D_3__Pseudomonadales	D_4__Moraxellaceae	D_5__Moraxella
denovo7418	10	1	0	0	8	0	0	0	6	0	0	0	10	0	0	0	7	0	0	1	D_0__Bacteria	D_1__Bacteroidetes	D_2__Sphingobacteriia	D_3__Sphingobacteriales	D_4__ST-12K33		D_6__uncultured bacterium
denovo8128	10	0	0	0	17	0	0	0	6	0	0	0	3	0	0	0	3	0	0	0	D_0__Bacteria	D_1__Bacteroidetes	D_2__Sphingobacteriia	D_3__Sphingobacteriales	D_4__Saprospiraceae	D_5__uncultured	D_6__uncultured bacterium
denovo844	10	0	0	0	6	0	0	0	8	0	0	0	11	0	0	0	10	0	0	0	D_0__Bacteria	D_1__Bacteroidetes	D_2__Flavobacteriia	D_3__Flavobacteriales	D_4__Flavobacteriaceae	D_5__Flavobacterium
denovo9001	10	0	0	0	5	0	0	0	5	1	3	0	6	1	0	0	3	0	0	0	D_0__Bacteria	D_1__Firmicutes	D_2__Erysipelotrichia	D_3__Erysipelotrichales	D_4__Erysipelotrichaceae	D_5__Erysipelotrichaceae UCG-004	D_6__uncultured bacterium
denovo9821	10	0	0	0	4	1	0	0	7	0	0	0	4	0	0	0	3	0	0	0	D_0__Bacteria	D_1__Firmicutes	D_2__Clostridia	D_3__Clostridiales	D_4__Christensenellaceae	D_5__Christensenellaceae R-7 group	D_6__uncultured bacterium
denovo10361	9	1	1	1	2	0	1	0	7	1	0	0	2	0	0	0	5	0	1	0	D_0__Bacteria	D_1__Proteobacteria	D_2__Betaproteobacteria	D_3__Burkholderiales	D_4__Comamonadaceae	D_5__Brachymonas	D_6__uncultured bacterium
denovo11694	9	0	0	0	5	0	0	0	6	0	0	0	1	0	0	0	6	0	0	0	D_0__Bacteria	D_1__Bacteroidetes	D_2__Flavobacteriia	D_3__Flavobacteriales	D_4__Flavobacteriaceae	D_5__Empedobacter	D_6__uncultured bacterium
denovo12131	9	1	0	0	4	1	0	0	3	1	0	0	2	0	1	0	1	0	0	0	D_0__Bacteria	D_1__Firmicutes	D_2__Bacilli	D_3__Lactobacillales	D_4__Streptococcaceae	D_5__Streptococcus	D_6__uncultured bacterium
denovo123	9	1	0	0	6	0	1	0	3	0	1	0	10	0	0	0	3	0	0	0	D_0__Bacteria	D_1__Proteobacteria	D_2__Betaproteobacteria	D_3__Burkholderiales	D_4__Comamonadaceae	D_5__Acidovorax	D_6__uncultured bacterium
denovo12658	9	1	0	0	3	0	0	0	2	0	0	0	3	0	0	0	4	0	0	0	D_0__Bacteria	D_1__Proteobacteria	D_2__Gammaproteobacteria	D_3__Pseudomonadales	D_4__Pseudomonadaceae	D_5__Pseudomonas
denovo13369	9	0	0	0	4	0	0	0	5	0	0	0	5	0	0	0	7	0	0	0	D_0__Bacteria	D_1__Bacteroidetes	D_2__Bacteroidia	D_3__Bacteroidales	D_4__Prevotellaceae
denovo13600	9	1	0	0	19	0	0	0	9	0	0	0	14	0	0	0	11	0	0	0	D_0__Bacteria	D_1__Proteobacteria	D_2__Gammaproteobacteria	D_3__Xanthomonadales	D_4__Xanthomonadaceae	D_5__uncultured	D_6__uncultured Bacillus sp.
denovo13936	9	1	0	0	16	0	0	0	11	0	0	0	13	0	0	0	23	0	0	0	D_0__Bacteria	D_1__Proteobacteria	D_2__Alphaproteobacteria	D_3__Rhodospirillales	D_4__Rhodospirillaceae	D_5__uncultured	D_6__uncultured bacterium
denovo14432	9	0	0	0	6	0	0	0	6	0	0	0	4	0	0	0	9	0	0	0	D_0__Bacteria	D_1__Firmicutes	D_2__Clostridia	D_3__Clostridiales	D_4__Ruminococcaceae	D_5__Ruminococcaceae NK4A214 group	D_6__uncultured bacterium
denovo14530	9	4	1	0	19	3	3	0	6	0	1	0	11	1	0	0	13	1	0	0	D_0__Bacteria	D_1__Proteobacteria	D_2__Alphaproteobacteria	D_3__Rhizobiales	D_4__Bradyrhizobiaceae	D_5__Bradyrhizobium
denovo14923	9	0	0	0	8	1	0	0	8	0	0	0	14	0	0	0	12	1	0	0	D_0__Bacteria	D_1__Firmicutes	D_2__Clostridia	D_3__Clostridiales	D_4__Ruminococcaceae	D_5__Ruminococcaceae UCG-002	D_6__uncultured bacterium
denovo16177	9	1	0	0	16	0	0	0	12	0	0	0	10	0	0	0	14	0	0	0	D_0__Bacteria	D_1__Proteobacteria	D_2__Alphaproteobacteria	D_3__DB1-14	D_4__uncultured bacterium	D_5__uncultured bacterium
denovo16893	9	1	0	0	6	0	0	0	14	0	0	0	8	0	0	0	6	1	0	0	D_0__Bacteria	D_1__Proteobacteria	D_2__Deltaproteobacteria	D_3__Desulfovibrionales	D_4__Desulfovibrionaceae	D_5__Desulfovibrio	D_6__uncultured bacterium
denovo17433	9	1	0	0	7	1	0	0	4	2	0	0	11	0	0	0	10	0	0	0	D_0__Bacteria	D_1__Proteobacteria	D_2__Alphaproteobacteria	D_3__Sphingomonadales	D_4__Sphingomonadaceae	D_5__Sphingomonas	D_6__uncultured bacterium
denovo18719	9	1	0	0	15	0	0	0	12	0	0	0	17	0	0	0	25	0	0	0	D_0__Bacteria	D_1__Bacteroidetes	D_2__Flavobacteriia	D_3__Flavobacteriales	D_4__Flavobacteriaceae	D_5__Flavobacterium	D_6__uncultured bacterium
denovo18922	9	1	0	0	14	2	0	0	17	2	1	0	17	1	1	0	7	0	0	0	D_0__Bacteria	D_1__Firmicutes	D_2__Erysipelotrichia	D_3__Erysipelotrichales	D_4__Erysipelotrichaceae	D_5__Erysipelotrichaceae UCG-004	D_6__uncultured bacterium
denovo20458	9	0	0	0	8	0	0	0	3	0	0	0	4	0	0	0	3	0	0	0	D_0__Bacteria	D_1__Bacteroidetes	D_2__Cytophagia	D_3__Cytophagales	D_4__Cytophagaceae	D_5__Runella	D_6__uncultured bacterium
denovo20685	9	0	2	0	5	0	0	0	3	0	0	0	5	0	0	0	6	0	0	0	D_0__Bacteria	D_1__Bacteroidetes	D_2__Sphingobacteriia	D_3__Sphingobacteriales	D_4__Saprospiraceae	D_5__Lewinella	D_6__uncultured bacterium
denovo21811	9	3	0	0	9	4	0	0	7	0	0	0	11	0	0	0	6	1	0	0	D_0__Bacteria	D_1__Actinobacteria	D_2__Acidimicrobiia	D_3__Acidimicrobiales	D_4__Acidimicrobiales Incertae Sedis	D_5__Candidatus Microthrix
denovo22219	9	1	0	0	1	0	0	0	0	0	0	0	0	0	0	0	1	0	0	0	D_0__Bacteria	D_1__Firmicutes	D_2__Negativicutes	D_3__Selenomonadales	D_4__Veillonellaceae	D_5__uncultured	D_6__uncultured bacterium
denovo22432	9	0	0	0	1	0	0	0	1	0	0	0	2	0	0	0	7	0	0	0	D_0__Bacteria	D_1__Chlamydiae	D_2__Chlamydiae	D_3__Chlamydiales	D_4__Parachlamydiaceae	D_5__Candidatus Protochlamydia	D_6__uncultured bacterium
denovo2523	9	1	1	0	9	0	0	0	7	1	1	0	7	0	0	0	16	0	0	0	D_0__Bacteria	D_1__Proteobacteria	D_2__Alphaproteobacteria	D_3__Caulobacterales	D_4__Caulobacteraceae	D_5__Caulobacter	D_6__uncultured bacterium
denovo3602	9	0	0	0	5	0	0	0	4	0	0	0	1	0	0	0	6	0	0	0	D_0__Bacteria	D_1__Verrucomicrobia	D_2__Opitutae	D_3__Opitutales	D_4__Opitutaceae	D_5__Opitutus
denovo3883	9	0	0	0	11	0	0	0	17	0	0	0	9	0	0	0	13	0	0	0	D_0__Bacteria	D_1__Proteobacteria	D_2__Deltaproteobacteria	D_3__Myxococcales	D_4__Sandaracinaceae	D_5__uncultured
denovo4256	9	0	0	0	5	2	0	0	8	1	0	0	4	0	0	0	4	6	5	2	D_0__Bacteria	D_1__Firmicutes	D_2__Clostridia	D_3__Clostridiales	D_4__Ruminococcaceae	D_5__Subdoligranulum	D_6__uncultured organism
denovo5253	9	0	0	0	6	0	0	0	3	0	0	0	5	0	0	0	2	0	0	0	D_0__Bacteria	D_1__Proteobacteria	D_2__Betaproteobacteria	D_3__Rhodocyclales	D_4__Rhodocyclaceae	D_5__Propionivibrio	D_6__uncultured bacterium
denovo5745	9	0	0	0	3	0	0	0	10	0	0	0	7	0	0	0	6	0	0	0	D_0__Bacteria	D_1__Proteobacteria	D_2__Alphaproteobacteria	D_3__Rickettsiales	D_4__uncultured	D_5__uncultured bacterium
denovo5849	9	0	0	0	14	0	0	0	26	0	0	0	10	0	0	0	13	0	0	0	D_0__Bacteria	D_1__Bacteroidetes	D_2__Bacteroidia	D_3__Bacteroidales	D_4__p-2534-18B5 gut group	D_5__uncultured bacterium
denovo6453	9	0	0	0	4	0	0	0	5	0	0	0	6	0	0	0	2	0	0	0	D_0__Bacteria	D_1__Saccharibacteria	D_2__uncultured bacterium	D_3__uncultured bacterium	D_4__uncultured bacterium	D_5__uncultured bacterium	D_6__uncultured bacterium
denovo6604	9	3	0	0	3	0	0	0	5	0	0	0	12	1	0	0	13	0	0	0	D_0__Bacteria	D_1__Proteobacteria	D_2__Alphaproteobacteria	D_3__Rhodospirillales	D_4__Acetobacteraceae	D_5__Roseomonas
denovo6834	9	3	0	0	3	0	0	0	11	0	0	0	2	0	0	0	16	0	0	0	D_0__Bacteria	D_1__Bacteroidetes	D_2__Flavobacteriia	D_3__Flavobacteriales	D_4__Flavobacteriaceae	D_5__Epilithonimonas	D_6__uncultured bacterium
denovo7157	9	0	0	0	7	1	0	0	11	0	0	0	6	0	0	0	16	0	0	0	D_0__Bacteria	D_1__Chloroflexi	D_2__Caldilineae	D_3__Caldilineales	D_4__Caldilineaceae	D_5__uncultured
denovo7456	9	0	0	0	6	1	2	0	4	0	0	0	3	0	0	0	6	0	0	0	D_0__Bacteria	D_1__Proteobacteria	D_2__Deltaproteobacteria	D_3__Desulfovibrionales	D_4__Desulfovibrionaceae	D_5__Desulfovibrio	D_6__uncultured bacterium
denovo8926	9	1	1	0	17	0	0	0	20	0	1	0	85	5	0	0	31	1	0	0	D_0__Bacteria	D_1__Proteobacteria	D_2__Gammaproteobacteria	D_3__Pseudomonadales	D_4__Moraxellaceae	D_5__Acinetobacter
denovo925	9	0	0	0	0	0	0	0	1	0	0	0	0	0	0	0	2	0	0	0	D_0__Bacteria	D_1__Bacteroidetes	D_2__Sphingobacteriia	D_3__Sphingobacteriales	D_4__Saprospiraceae	D_5__uncultured
denovo9327	9	0	0	0	9	0	0	0	3	0	0	0	3	0	0	0	1	0	0	0	Unassigned						D_6__uncultured bacterium
denovo9472	9	0	0	0	5	0	0	0	3	0	0	0	6	0	0	0	6	0	0	0	D_0__Bacteria	D_1__Verrucomicrobia	D_2__Verrucomicrobiae	D_3__Verrucomicrobiales	D_4__Verrucomicrobiaceae	D_5__Prosthecobacter	D_6__uncultured bacterium
denovo10785	8	0	0	0	10	0	0	0	7	0	0	0	6	0	0	0	4	0	0	0	D_0__Bacteria	D_1__Proteobacteria	D_2__Alphaproteobacteria	D_3__Rickettsiales	D_4__Rickettsiaceae	D_5__uncultured
denovo12714	8	1	0	0	9	0	0	0	8	0	0	0	2	0	1	0	5	0	0	0	D_0__Bacteria	D_1__Elusimicrobia	D_2__Elusimicrobia	D_3__MVP-88	D_4__uncultured bacterium	D_5__uncultured bacterium	D_6__uncultured bacterium
denovo13195	8	0	0	0	1	0	0	0	1	0	0	0	2	0	0	0	1	0	0	0	D_0__Bacteria	D_1__Proteobacteria	D_2__Alphaproteobacteria	D_3__Rickettsiales	D_4__Rickettsiales Incertae Sedis	D_5__Candidatus Odyssella	D_6__uncultured bacterium
denovo14485	8	0	0	0	8	0	0	0	7	0	0	0	5	0	0	0	8	0	0	0	D_0__Bacteria	D_1__Bacteroidetes	D_2__Flavobacteriia	D_3__Flavobacteriales	D_4__Flavobacteriaceae	D_5__Flavobacterium	D_6__uncultured prokaryote
denovo14766	8	0	0	0	5	0	0	0	4	0	0	0	6	0	0	0	5	1	0	0	D_0__Bacteria	D_1__Proteobacteria	D_2__Alphaproteobacteria	D_3__Rhodospirillales	D_4__Rhodospirillaceae	D_5__uncultured	D_6__uncultured bacterium
denovo16592	8	0	0	0	0	0	0	0	5	0	0	0	5	0	0	0	6	3	0	0	D_0__Bacteria	D_1__Firmicutes	D_2__Clostridia	D_3__Clostridiales	D_4__Ruminococcaceae	D_5__Ruminococcaceae UCG-013	D_6__uncultured bacterium
denovo16621	8	1	0	0	13	0	0	0	14	0	0	0	5	0	0	0	6	1	0	0	D_0__Bacteria	D_1__Bacteroidetes	D_2__Bacteroidia	D_3__Bacteroidales	D_4__Porphyromonadaceae	D_5__Paludibacter	D_6__uncultured bacterium
denovo17307	8	1	0	0	2	1	0	0	3	0	0	0	1	0	0	0	2	0	0	0	D_0__Bacteria	D_1__Proteobacteria	D_2__Gammaproteobacteria				D_6__uncultured bacterium
denovo17366	8	0	0	0	3	0	0	0	5	0	0	0	4	0	0	0	2	0	0	0	D_0__Bacteria	D_1__Proteobacteria	D_2__Betaproteobacteria	D_3__Burkholderiales	D_4__Comamonadaceae	D_5__Piscinibacter	D_6__uncultured bacterium
denovo19001	8	1	0	0	3	0	0	0	6	0	0	0	67	0	0	0	10	1	0	0	D_0__Bacteria	D_1__Firmicutes	D_2__Bacilli	D_3__Bacillales	D_4__Planococcaceae	D_5__Kurthia	D_6__uncultured delta proteobacterium
denovo20328	8	0	0	0	3	0	0	0	4	0	0	0	3	0	0	0	2	0	0	0	D_0__Bacteria	D_1__Firmicutes	D_2__Negativicutes	D_3__Selenomonadales	D_4__Veillonellaceae	D_5__uncultured
denovo20621	8	0	0	0	10	1	0	0	15	0	0	0	13	0	0	0	8	1	1	0	D_0__Bacteria	D_1__Proteobacteria	D_2__Betaproteobacteria	D_3__Neisseriales	D_4__Neisseriaceae
denovo20696	8	0	0	0	7	0	0	0	2	0	0	0	3	0	0	0	5	0	0	0	D_0__Bacteria	D_1__Proteobacteria	D_2__Gammaproteobacteria	D_3__Xanthomonadales	D_4__Xanthomonadaceae	D_5__uncultured
denovo20697	8	0	0	0	1	0	0	0	6	0	0	0	5	0	0	0	3	0	0	0	D_0__Bacteria	D_1__Proteobacteria	D_2__Betaproteobacteria	D_3__DR-16	D_4__uncultured bacterium	D_5__uncultured bacterium
denovo20806	8	1	0	0	9	1	0	0	7	0	0	0	1	0	0	0	3	0	0	0	D_0__Bacteria	D_1__Firmicutes	D_2__Negativicutes	D_3__Selenomonadales	D_4__Veillonellaceae	D_5__uncultured	D_6__uncultured bacterium
denovo20948	8	2	0	0	2	0	0	0	5	0	0	0	5	0	0	0	6	0	0	0	D_0__Bacteria	D_1__Proteobacteria	D_2__Deltaproteobacteria	D_3__Oligoflexales
denovo21849	8	2	0	0	8	1	0	0	3	0	1	0	5	1	0	0	7	4	2	0	D_0__Bacteria	D_1__Firmicutes	D_2__Clostridia	D_3__Clostridiales	D_4__Family XIII	D_5__[Eubacterium] brachy group
denovo230	8	0	0	0	5	0	0	0	5	0	0	0	3	0	0	0	5	1	0	0	D_0__Bacteria	D_1__Proteobacteria	D_2__Deltaproteobacteria	D_3__Myxococcales	D_4__Polyangiaceae	D_5__Sorangium	D_6__uncultured bacterium
denovo5557	8	2	0	0	6	1	0	0	9	0	0	0	5	0	0	0	9	0	0	0	D_0__Bacteria	D_1__Proteobacteria	D_2__Betaproteobacteria	D_3__Burkholderiales	D_4__Comamonadaceae	D_5__uncultured	D_6__uncultured bacterium
denovo5891	8	1	0	0	4	0	0	0	9	0	0	0	7	0	0	0	6	0	0	0	D_0__Bacteria	D_1__Proteobacteria	D_2__Betaproteobacteria	D_3__Neisseriales	D_4__Neisseriaceae	D_5__Formivibrio
denovo6381	8	4	0	0	5	0	0	0	3	2	0	0	8	0	0	0	11	0	0	0	D_0__Bacteria	D_1__Proteobacteria	D_2__Betaproteobacteria	D_3__Burkholderiales	D_4__Comamonadaceae	D_5__Simplicispira	D_6__uncultured bacterium
denovo6749	8	0	0	0	18	1	1	0	8	1	1	0	8	0	0	0	13	0	0	0	D_0__Bacteria	D_1__Saccharibacteria	D_2__uncultured bacterium	D_3__uncultured bacterium	D_4__uncultured bacterium	D_5__uncultured bacterium	D_6__uncultured bacterium
denovo7031	8	5	4	0	9	168	783	155	5	1	0	0	6	0	0	0	4	9	35	269	D_0__Bacteria	D_1__Firmicutes	D_2__Bacilli	D_3__Lactobacillales	D_4__Enterococcaceae	D_5__Enterococcus	D_6__uncultured bacterium
denovo8099	8	0	0	0	11	0	0	0	10	0	0	0	6	0	0	0	5	1	0	0	D_0__Bacteria	D_1__Proteobacteria	D_2__Betaproteobacteria	D_3__Neisseriales	D_4__Neisseriaceae	D_5__Neisseria
denovo8105	8	0	1	0	15	0	0	0	13	0	0	0	3	0	0	0	8	0	0	0	D_0__Bacteria	D_1__Bacteroidetes	D_2__Sphingobacteriia	D_3__Sphingobacteriales	D_4__Chitinophagaceae	D_5__uncultured
denovo9122	8	0	0	0	1	0	0	0	1	0	0	0	2	0	0	0	1	0	0	0	D_0__Bacteria	D_1__Chlorobi	D_2__Chlorobia	D_3__Chlorobiales	D_4__OPB56	D_5__uncultured bacterium	D_6__uncultured bacterium
denovo9196	8	0	0	0	8	0	0	0	6	0	0	0	6	0	0	0	6	0	0	0	D_0__Bacteria	D_1__Planctomycetes	D_2__BD7-11	D_3__uncultured bacterium	D_4__uncultured bacterium	D_5__uncultured bacterium
denovo957	8	4	0	0	9	2	1	0	4	0	0	0	7	0	0	0	14	3	0	0	D_0__Bacteria	D_1__Proteobacteria	D_2__Alphaproteobacteria	D_3__Rhodobacterales	D_4__Rhodobacteraceae	D_5__Rhodobacter
denovo9961	8	1	0	0	1	0	0	0	4	0	0	0	4	1	0	0	3	0	0	0	D_0__Bacteria	D_1__Saccharibacteria	D_2__uncultured bacterium	D_3__uncultured bacterium	D_4__uncultured bacterium	D_5__uncultured bacterium
denovo9967	8	3	0	0	3	0	0	0	0	0	0	0	1	0	0	0	2	0	0	0	D_0__Bacteria	D_1__Proteobacteria	D_2__Deltaproteobacteria	D_3__Syntrophobacterales	D_4__Syntrophaceae	D_5__uncultured
denovo10311	7	0	0	0	4	0	0	0	6	0	0	0	5	0	0	0	9	0	0	0	D_0__Bacteria	D_1__Bacteroidetes	D_2__Flavobacteriia	D_3__Flavobacteriales	D_4__Flavobacteriaceae	D_5__Flavobacterium	D_6__uncultured bacterium
denovo10885	7	0	0	0	12	2	0	0	13	6	0	0	4	0	0	0	13	0	0	0	D_0__Bacteria	D_1__Bacteroidetes	D_2__Bacteroidia	D_3__Bacteroidales	D_4__Bacteroidaceae	D_5__Bacteroides	D_6__uncultured bacterium
denovo11973	7	0	0	0	4	0	0	0	0	0	0	0	2	0	0	0	4	0	0	0	Unassigned						D_6__uncultured organism
denovo11976	7	0	0	0	14	0	0	0	6	1	0	0	6	0	0	0	7	0	0	0	D_0__Bacteria	D_1__Proteobacteria	D_2__Alphaproteobacteria	D_3__Rickettsiales	D_4__SM2D12	D_5__uncultured bacterium	D_6__uncultured bacterium
denovo12418	7	0	0	0	2	1	0	0	3	0	0	0	5	0	0	0	3	0	0	0	D_0__Bacteria	D_1__Firmicutes	D_2__Negativicutes	D_3__Selenomonadales	D_4__Veillonellaceae	D_5__Schwartzia	D_6__uncultured bacterium
denovo12824	7	0	0	0	3	0	0	0	4	0	0	0	4	0	0	0	6	0	0	0	D_0__Bacteria	D_1__Proteobacteria	D_2__Gammaproteobacteria	D_3__Alteromonadales	D_4__Shewanellaceae	D_5__Shewanella
denovo12920	7	0	0	0	12	0	0	0	11	0	0	0	8	0	0	0	4	0	0	0	D_0__Bacteria	D_1__Bacteroidetes	D_2__Cytophagia	D_3__Cytophagales	D_4__Cytophagaceae	D_5__Flectobacillus	D_6__uncultured bacterium
denovo13014	7	2	0	1	3	0	0	0	4	0	0	0	7	0	0	0	6	0	0	0	D_0__Bacteria	D_1__Bacteroidetes	D_2__Sphingobacteriia	D_3__Sphingobacteriales	D_4__Saprospiraceae	D_5__uncultured
denovo13026	7	0	0	0	4	0	0	0	2	0	0	0	4	0	0	0	9	0	0	0	D_0__Bacteria	D_1__Bacteroidetes	D_2__Sphingobacteriia	D_3__Sphingobacteriales	D_4__Saprospiraceae	D_5__uncultured
denovo14190	7	3	0	0	3	0	0	0	8	1	0	0	8	0	0	0	3	0	0	0	D_0__Bacteria	D_1__Thermotogae	D_2__Thermotogae	D_3__Thermotogales	D_4__Thermotogaceae	D_5__Mesotoga
denovo14342	7	0	0	1	7	2	0	0	6	0	0	0	8	0	0	0	11	0	0	0	D_0__Bacteria	D_1__Saccharibacteria	D_2__uncultured bacterium	D_3__uncultured bacterium	D_4__uncultured bacterium	D_5__uncultured bacterium	D_6__uncultured bacterium
denovo16031	7	0	0	0	3	0	0	0	1	0	0	0	0	0	0	0	2	0	0	0	D_0__Bacteria	D_1__Proteobacteria	D_2__Betaproteobacteria	D_3__Neisseriales	D_4__Neisseriaceae
denovo16380	7	3	0	0	5	3	1	0	7	0	7	0	9	0	0	0	1	1	0	1	D_0__Bacteria	D_1__Firmicutes	D_2__Clostridia	D_3__Clostridiales	D_4__Ruminococcaceae	D_5__Faecalibacterium
denovo16935	7	0	0	0	6	0	0	0	4	0	0	0	2	0	0	0	2	0	0	0	D_0__Bacteria	D_1__Proteobacteria	D_2__Deltaproteobacteria	D_3__Myxococcales	D_4__Polyangiaceae	D_5__Byssovorax
denovo16973	7	1	0	0	10	6	1	0	2	0	0	0	8	1	0	0	9	1	1	0	D_0__Bacteria	D_1__Actinobacteria	D_2__Actinobacteria	D_3__Propionibacteriales	D_4__Propionibacteriaceae	D_5__uncultured
denovo17023	7	0	0	0	3	0	0	0	5	1	0	0	4	0	0	0	2	0	0	0	D_0__Bacteria	D_1__Proteobacteria	D_2__Gammaproteobacteria	D_3__Pseudomonadales	D_4__Moraxellaceae	D_5__Acinetobacter
denovo1716	7	0	0	0	0	0	0	0	4	0	0	0	0	0	0	0	1	0	0	0	D_0__Bacteria	D_1__Proteobacteria	D_2__Deltaproteobacteria	D_3__Bdellovibrionales	D_4__Bacteriovoracaceae	D_5__uncultured
denovo18192	7	0	0	0	6	1	0	0	9	0	0	0	12	1	0	0	13	0	0	0	D_0__Bacteria	D_1__Proteobacteria	D_2__Betaproteobacteria	D_3__Rhodocyclales	D_4__Rhodocyclaceae	D_5__Propionivibrio	D_6__uncultured bacterium
denovo1823	7	0	0	0	1	1	0	0	1	2	0	0	1	0	0	0	2	0	0	0	D_0__Bacteria	D_1__Candidate division WS6	D_2__uncultured bacterium	D_3__uncultured bacterium	D_4__uncultured bacterium	D_5__uncultured bacterium
denovo19201	7	1	1	1	5	20	1	0	8	9	2	0	14	5	0	0	12	40	4	1	D_0__Bacteria	D_1__Firmicutes	D_2__Clostridia	D_3__Clostridiales	D_4__Family XIII	D_5__[Eubacterium] nodatum group	D_6__uncultured bacterium
denovo19237	7	1	0	0	5	0	0	0	4	1	3	0	2	0	0	0	2	2	0	0	D_0__Bacteria	D_1__Candidate division WS6					D_6__uncultured Chloroflexi bacterium
denovo1993	7	0	0	0	4	0	0	0	6	0	0	0	9	0	0	0	6	0	0	0	D_0__Bacteria	D_1__Proteobacteria	D_2__Deltaproteobacteria	D_3__Bdellovibrionales	D_4__Bdellovibrionaceae	D_5__Bdellovibrio	D_6__uncultured bacterium
denovo19942	7	1	0	0	9	0	0	0	6	0	0	0	6	0	0	0	5	0	0	0	D_0__Bacteria	D_1__Proteobacteria	D_2__Betaproteobacteria	D_3__Burkholderiales	D_4__Comamonadaceae	D_5__Limnohabitans	D_6__uncultured bacterium
denovo19946	7	2	0	0	7	0	0	0	10	2	0	0	41	7	0	0	17	0	0	0	D_0__Bacteria	D_1__Bacteroidetes	D_2__Flavobacteriia	D_3__Flavobacteriales	D_4__Flavobacteriaceae	D_5__Empedobacter	D_6__uncultured alpha proteobacterium
denovo20030	7	1	0	0	3	1	0	0	5	1	0	0	6	0	0	0	3	0	0	0	D_0__Bacteria	D_1__Proteobacteria	D_2__Betaproteobacteria	D_3__Neisseriales	D_4__Neisseriaceae	D_5__Neisseria	D_6__uncultured bacterium
denovo20469	7	0	0	0	6	0	0	0	7	0	0	0	3	0	0	0	3	0	0	0	D_0__Bacteria	D_1__Bacteroidetes	D_2__Bacteroidia	D_3__Bacteroidales	D_4__Marinilabiaceae	D_5__Mangroviflexus	D_6__uncultured bacterium
denovo20716	7	0	0	0	1	0	0	0	3	0	0	0	4	0	0	0	4	0	0	0	D_0__Bacteria	D_1__Proteobacteria	D_2__Deltaproteobacteria	D_3__Myxococcales	D_4__mle1-27	D_5__uncultured delta proteobacterium	D_6__uncultured bacterium
denovo20925	7	5	0	0	1	0	0	0	11	0	0	0	9	1	0	0	11	0	0	0	D_0__Bacteria	D_1__Proteobacteria	D_2__Alphaproteobacteria	D_3__Rhodospirillales	D_4__Acetobacteraceae	D_5__Stella	D_6__uncultured bacterium
denovo2105	7	3	0	0	12	2	4	0	15	1	0	0	39	3	0	0	27	3	0	1	D_0__Bacteria	D_1__Proteobacteria	D_2__Gammaproteobacteria	D_3__Xanthomonadales	D_4__Xanthomonadaceae	D_5__Stenotrophomonas	D_6__uncultured bacterium
denovo21837	7	1	0	0	5	0	0	0	3	0	0	0	5	0	0	0	6	0	0	0	D_0__Bacteria	D_1__Firmicutes	D_2__Clostridia	D_3__Clostridiales	D_4__Christensenellaceae	D_5__Christensenellaceae R-7 group	D_6__uncultured bacterium
denovo22270	7	1	0	0	5	0	0	0	10	0	0	0	8	0	0	0	9	0	0	0	D_0__Bacteria	D_1__Proteobacteria	D_2__Gammaproteobacteria	D_3__Xanthomonadales	D_4__Xanthomonadales Incertae Sedis	D_5__uncultured
denovo22435	7	0	0	0	2	0	0	0	0	2	0	0	2	0	0	0	2	0	0	1	D_0__Bacteria	D_1__Firmicutes	D_2__Clostridia	D_3__Thermoanaerobacterales	D_4__Thermoanaerobacteraceae	D_5__Gelria	D_6__uncultured bacterium
denovo2698	7	1	0	0	4	0	0	0	2	0	2	0	1	0	0	0	4	0	0	0	D_0__Bacteria	D_1__Proteobacteria	D_2__Betaproteobacteria	D_3__Rhodocyclales	D_4__Rhodocyclaceae	D_5__Candidatus Accumulibacter
denovo3412	7	2	0	0	8	0	0	0	16	1	2	0	9	0	0	0	10	1	0	0	D_0__Bacteria	D_1__Firmicutes	D_2__Clostridia	D_3__Clostridiales	D_4__Ruminococcaceae	D_5__[Eubacterium] coprostanoligenes group	D_6__uncultured bacterium
denovo6497	7	0	0	0	4	0	0	0	2	0	0	0	2	0	0	0	2	0	0	0	D_0__Bacteria	D_1__Bacteroidetes	D_2__Sphingobacteriia	D_3__Sphingobacteriales	D_4__Chitinophagaceae	D_5__uncultured
denovo7370	7	0	0	0	10	0	0	0	9	0	0	0	12	0	0	0	1	0	0	0	D_0__Bacteria	D_1__Firmicutes	D_2__Erysipelotrichia	D_3__Erysipelotrichales	D_4__Erysipelotrichaceae	D_5__Erysipelotrichaceae UCG-004	D_6__uncultured beta proteobacterium
denovo7446	7	2	0	0	12	0	0	0	8	0	0	0	12	0	0	0	8	0	0	0	D_0__Bacteria	D_1__Bacteroidetes	D_2__Sphingobacteriia	D_3__Sphingobacteriales	D_4__Chitinophagaceae	D_5__Ferruginibacter
denovo777	7	0	0	0	3	0	0	0	7	0	0	0	5	0	0	0	6	0	0	0	D_0__Bacteria	D_1__Saccharibacteria	D_2__uncultured bacterium	D_3__uncultured bacterium	D_4__uncultured bacterium	D_5__uncultured bacterium	D_6__uncultured bacterium
denovo7920	7	0	0	0	8	0	0	0	8	0	0	0	8	0	0	0	8	0	0	0	Unassigned						D_6__uncultured rumen bacterium
denovo9189	7	1	0	0	3	0	0	0	4	1	0	0	4	0	0	0	6	0	0	0	D_0__Bacteria	D_1__Bacteroidetes	D_2__Sphingobacteriia	D_3__Sphingobacteriales	D_4__Chitinophagaceae	D_5__Filimonas	D_6__uncultured bacterium
denovo10509	6	0	0	0	8	0	1	0	12	0	0	0	8	0	0	0	3	0	0	0	D_0__Bacteria	D_1__Proteobacteria	D_2__Deltaproteobacteria	D_3__Bdellovibrionales	D_4__Bdellovibrionaceae	D_5__Bdellovibrio	D_6__uncultured organism
denovo11596	6	0	0	0	0	0	0	0	1	0	0	0	1	0	0	0	0	0	0	0	D_0__Bacteria	D_1__Fusobacteria	D_2__Fusobacteriia	D_3__Fusobacteriales	D_4__Leptotrichiaceae	D_5__uncultured	D_6__uncultured bacterium
denovo13053	6	2	0	0	7	1	0	0	6	0	1	0	3	0	0	0	1	0	1	0	D_0__Bacteria	D_1__Bacteroidetes	D_2__Bacteroidetes vadinHA17
denovo14008	6	2	1	0	4	1	0	0	6	0	1	0	10	0	0	0	3	0	1	0	D_0__Bacteria	D_1__Proteobacteria	D_2__Betaproteobacteria	D_3__Rhodocyclales	D_4__Rhodocyclaceae	D_5__uncultured
denovo1408	6	3	0	0	12	2	0	1	9	0	0	0	4	0	0	0	6	0	0	0	D_0__Bacteria	D_1__Bacteroidetes	D_2__Bacteroidia	D_3__Bacteroidales	D_4__Porphyromonadaceae	D_5__Dysgonomonas	D_6__uncultured bacterium
denovo14514	6	2	0	0	4	0	0	0	5	0	0	0	10	0	0	0	15	0	0	0	D_0__Bacteria	D_1__Proteobacteria	D_2__Alphaproteobacteria	D_3__DB1-14	D_4__uncultured alpha proteobacterium	D_5__uncultured alpha proteobacterium	D_6__uncultured bacterium
denovo15028	6	0	0	0	12	0	0	0	3	0	0	0	4	0	0	0	2	0	0	0	D_0__Bacteria	D_1__Proteobacteria	D_2__Gammaproteobacteria	D_3__Xanthomonadales	D_4__Xanthomonadaceae	D_5__Arenimonas
denovo15110	6	0	0	0	7	0	0	0	1	0	0	0	6	0	0	0	4	0	0	0	D_0__Bacteria	D_1__Proteobacteria	D_2__Betaproteobacteria	D_3__Neisseriales	D_4__Neisseriaceae		D_6__uncultured bacterium
denovo15624	6	1	0	0	14	2	0	0	9	1	0	0	17	2	0	0	5	1	0	0	D_0__Bacteria	D_1__Saccharibacteria					D_6__uncultured bacterium
denovo15842	6	0	0	0	1	0	0	0	0	0	0	0	1	0	0	0	3	0	0	0	D_0__Bacteria	D_1__Proteobacteria	D_2__Alphaproteobacteria	D_3__Rhodospirillales	D_4__I-10	D_5__uncultured bacterium
denovo16351	6	0	0	0	2	1	1	0	1	0	0	0	2	1	0	0	0	0	0	0	D_0__Bacteria	D_1__Candidate division WS6					D_6__uncultured bacterium
denovo17387	6	0	0	0	20	0	0	0	11	0	0	0	3	0	0	0	9	0	0	0	Unassigned						D_6__uncultured bacterium
denovo17463	6	2	0	0	4	0	0	0	2	0	0	0	4	0	0	0	8	0	0	0	D_0__Bacteria	D_1__Bacteroidetes	D_2__Flavobacteriia	D_3__Flavobacteriales	D_4__Flavobacteriaceae	D_5__Flavobacterium
denovo17488	6	0	0	0	2	0	0	0	1	0	0	0	3	0	0	0	1	0	0	0	D_0__Bacteria	D_1__Proteobacteria	D_2__Alphaproteobacteria	D_3__Rhodospirillales	D_4__Acetobacteraceae	D_5__uncultured	D_6__uncultured bacterium
denovo17667	6	0	0	0	3	0	0	0	3	1	0	0	1	1	0	0	3	0	0	0	D_0__Bacteria	D_1__Spirochaetae	D_2__Spirochaetes	D_3__Spirochaetales	D_4__Spirochaetaceae	D_5__uncultured	D_6__uncultured bacterium
denovo17751	6	1	0	0	0	0	0	0	3	0	0	0	0	0	0	0	3	0	0	0	D_0__Bacteria	D_1__Proteobacteria	D_2__Alphaproteobacteria	D_3__Rickettsiales	D_4__Rickettsiales Incertae Sedis	D_5__Candidatus Captivus
denovo17784	6	1	0	0	6	1	0	0	12	3	0	0	10	3	0	0	8	0	0	1	D_0__Bacteria	D_1__Chlamydiae	D_2__Chlamydiae	D_3__Chlamydiales	D_4__Parachlamydiaceae		D_6__uncultured bacterium
denovo17816	6	1	0	0	1	0	0	0	14	0	0	0	9	0	0	0	13	0	0	0	D_0__Bacteria	D_1__Proteobacteria	D_2__Deltaproteobacteria	D_3__Bdellovibrionales	D_4__Bdellovibrionaceae	D_5__Bdellovibrio	D_6__uncultured rumen bacterium
denovo19682	6	0	0	0	0	0	0	0	1	0	0	0	1	0	0	0	3	0	0	0	D_0__Bacteria	D_1__Proteobacteria	D_2__Deltaproteobacteria	D_3__Bdellovibrionales	D_4__Bacteriovoracaceae	D_5__Peredibacter	D_6__uncultured bacterium
denovo20074	6	0	0	0	2	0	0	0	2	0	0	0	5	0	0	0	1	0	0	0	D_0__Bacteria	D_1__Proteobacteria	D_2__Alphaproteobacteria	D_3__Sphingomonadales	D_4__Sphingomonadaceae	D_5__Sphingomonas	D_6__uncultured bacterium
denovo20240	6	0	0	0	5	0	0	0	6	0	0	0	5	0	0	0	7	0	0	0	D_0__Bacteria	D_1__Proteobacteria	D_2__Deltaproteobacteria	D_3__Desulfobacterales	D_4__Desulfobulbaceae	D_5__Desulfobulbus	D_6__uncultured bacterium
denovo20264	6	0	0	0	2	0	0	0	5	0	0	0	0	0	0	0	3	0	0	0	D_0__Bacteria	D_1__Proteobacteria	D_2__Deltaproteobacteria	D_3__Myxococcales	D_4__Blfdi19	D_5__uncultured bacterium	D_6__uncultured bacterium
denovo20551	6	0	0	0	9	0	0	0	3	0	0	0	9	0	0	0	9	0	0	0	D_0__Bacteria	D_1__Proteobacteria	D_2__Deltaproteobacteria	D_3__Myxococcales	D_4__Blfdi19	D_5__uncultured bacterium	D_6__uncultured bacterium
denovo20678	6	0	0	0	6	0	0	0	0	0	0	0	1	0	0	0	7	0	0	0	D_0__Bacteria	D_1__Planctomycetes	D_2__OM190	D_3__uncultured bacterium	D_4__uncultured bacterium	D_5__uncultured bacterium
denovo20797	6	0	0	0	1	0	0	0	0	0	0	0	2	0	0	0	0	0	0	0	D_0__Bacteria	D_1__Bacteroidetes	D_2__Cytophagia	D_3__Cytophagales	D_4__Cytophagaceae	D_5__uncultured	D_6__uncultured bacterium
denovo20970	6	0	1	0	17	4	4	0	10	28	2	0	10	2	0	0	15	3	0	0	D_0__Bacteria	D_1__Firmicutes	D_2__Clostridia	D_3__Clostridiales	D_4__Ruminococcaceae	D_5__Ruminococcaceae NK4A214 group	D_6__uncultured bacterium
denovo234	6	0	0	0	4	0	0	0	0	0	0	0	1	0	0	0	0	0	0	0	D_0__Bacteria	D_1__Chlorobi	D_2__Chlorobia	D_3__Chlorobiales	D_4__OPB56	D_5__uncultured bacterium	D_6__uncultured bacterium
denovo3301	6	1	0	0	0	0	0	0	5	0	0	0	2	0	0	0	12	0	0	0	D_0__Bacteria	D_1__Proteobacteria	D_2__Deltaproteobacteria	D_3__Myxococcales	D_4__Polyangiaceae	D_5__Byssovorax
denovo348	6	0	0	0	6	0	0	0	13	0	0	0	6	0	0	0	4	0	0	0	D_0__Bacteria	D_1__Proteobacteria	D_2__Betaproteobacteria	D_3__Neisseriales	D_4__Neisseriaceae	D_5__Formivibrio	D_6__uncultured bacterium
denovo3861	6	2	0	1	5	0	0	0	7	0	0	0	7	0	0	0	0	0	0	0	D_0__Bacteria	D_1__Bacteroidetes	D_2__Sphingobacteriia	D_3__Sphingobacteriales	D_4__env.OPS 17	D_5__uncultured bacterium	D_6__uncultured bacterium
denovo4035	6	0	0	0	6	0	1	0	6	1	0	0	7	0	0	0	6	0	0	0	D_0__Bacteria	D_1__Proteobacteria	D_2__Gammaproteobacteria	D_3__Xanthomonadales	D_4__Xanthomonadaceae	D_5__Xanthomonas
denovo4154	6	0	0	0	2	0	0	0	9	0	0	0	5	0	0	0	7	0	0	0	D_0__Bacteria	D_1__Proteobacteria	D_2__Deltaproteobacteria	D_3__Bdellovibrionales	D_4__Bdellovibrionaceae	D_5__Bdellovibrio
denovo4409	6	1	0	0	2	0	0	0	1	0	0	0	4	0	0	0	3	0	0	0	D_0__Bacteria	D_1__Bacteroidetes	D_2__Bacteroidia	D_3__Bacteroidia Incertae Sedis	D_4__Draconibacteriaceae	D_5__uncultured	D_6__Proteus mirabilis
denovo4450	6	0	0	0	1	0	0	0	10	0	0	0	6	0	0	0	4	0	0	0	D_0__Bacteria	D_1__Proteobacteria	D_2__Deltaproteobacteria	D_3__Bdellovibrionales	D_4__Bacteriovoracaceae
denovo4628	6	3	0	0	7	0	0	0	6	0	0	0	7	0	0	0	5	0	0	0	D_0__Bacteria	D_1__Proteobacteria	D_2__Gammaproteobacteria	D_3__Aeromonadales	D_4__Aeromonadaceae	D_5__Aeromonas	D_6__uncultured bacterium
denovo5689	6	0	0	0	4	0	0	0	1	0	0	0	3	0	0	0	2	0	0	0	D_0__Bacteria	D_1__Proteobacteria	D_2__Epsilonproteobacteria	D_3__Campylobacterales	D_4__Campylobacteraceae	D_5__Arcobacter	D_6__uncultured bacterium
denovo5819	6	1	0	0	9	0	0	0	9	0	0	0	9	0	0	0	12	0	0	0	D_0__Bacteria	D_1__Proteobacteria	D_2__Deltaproteobacteria	D_3__Oligoflexales	D_4__uncultured bacterium	D_5__uncultured bacterium	D_6__uncultured bacterium
denovo6396	6	0	0	0	3	0	0	0	3	0	0	0	1	0	0	0	2	0	0	0	Unassigned						D_6__uncultured bacterium
denovo6736	6	0	0	0	3	0	0	0	5	0	0	0	5	0	0	0	4	0	0	0	D_0__Bacteria	D_1__Verrucomicrobia	D_2__OPB35 soil group	D_3__uncultured Verrucomicrobia bacterium	D_4__uncultured Verrucomicrobia bacterium	D_5__uncultured Verrucomicrobia bacterium	D_6__uncultured bacterium
denovo7968	6	0	0	0	2	0	0	0	1	0	0	0	1	0	0	0	4	0	0	0	D_0__Bacteria	D_1__Bacteroidetes	D_2__Sphingobacteriia	D_3__Sphingobacteriales	D_4__Saprospiraceae	D_5__uncultured	D_6__uncultured bacterium
denovo8133	6	0	0	0	8	0	0	0	8	1	0	0	9	1	0	0	10	1	0	0	D_0__Bacteria	D_1__Proteobacteria	D_2__Epsilonproteobacteria	D_3__Campylobacterales	D_4__Campylobacteraceae	D_5__Sulfurospirillum	D_6__uncultured bacterium
denovo8563	6	1	0	0	1	1	0	0	2	0	0	0	4	0	0	0	1	0	0	0	D_0__Bacteria	D_1__Proteobacteria	D_2__Betaproteobacteria	D_3__Rhodocyclales	D_4__Rhodocyclaceae		D_6__uncultured bacterium
denovo9264	6	0	0	0	5	0	0	0	4	0	0	0	3	0	0	0	3	0	0	0	D_0__Bacteria	D_1__Bacteroidetes	D_2__Sphingobacteriia	D_3__Sphingobacteriales	D_4__Saprospiraceae	D_5__uncultured
denovo9293	6	1	0	0	0	1	0	0	1	0	0	0	7	0	0	0	0	1	0	0	D_0__Bacteria	D_1__Proteobacteria	D_2__Betaproteobacteria	D_3__Burkholderiales	D_4__Comamonadaceae	D_5__Comamonas	D_6__uncultured bacterium
denovo9405	6	3	0	0	4	0	0	0	3	54	0	0	5	4	0	0	4	0	0	0	D_0__Bacteria	D_1__Firmicutes	D_2__Erysipelotrichia	D_3__Erysipelotrichales	D_4__Erysipelotrichaceae	D_5__Erysipelotrichaceae UCG-004	D_6__uncultured bacterium
denovo10008	5	0	0	0	0	0	0	0	2	0	0	0	0	0	0	0	6	0	0	0	D_0__Bacteria	D_1__Proteobacteria	D_2__Betaproteobacteria	D_3__Neisseriales	D_4__Neisseriaceae
denovo1050	5	4	1	2	0	2	0	0	2	1	0	0	1	2	0	0	1	1	0	0	D_0__Bacteria	D_1__Bacteroidetes	D_2__Flavobacteriia	D_3__Flavobacteriales	D_4__NS9 marine group	D_5__uncultured bacterium
denovo10880	5	0	0	0	4	5	0	0	2	0	0	0	3	1	1	0	4	0	0	0	D_0__Bacteria	D_1__Acidobacteria	D_2__Acidobacteria	D_3__Subgroup 4	D_4__Unknown Family	D_5__Blastocatella
denovo11246	5	9	0	0	6	4	1	0	9	2	3	0	4	1	1	0	9	2	0	0	D_0__Bacteria	D_1__Proteobacteria	D_2__Betaproteobacteria	D_3__Burkholderiales	D_4__Comamonadaceae	D_5__Ottowia
denovo12435	5	1	0	0	8	1	0	0	7	3	0	0	3	0	0	0	10	1	0	0	D_0__Bacteria	D_1__Bacteroidetes	D_2__Bacteroidia	D_3__Bacteroidales	D_4__Rikenellaceae	D_5__Alistipes	D_6__uncultured bacterium
denovo12464	5	0	0	0	0	1	0	0	1	0	0	0	1	0	0	0	2	1	0	0	D_0__Bacteria	D_1__Proteobacteria	D_2__Deltaproteobacteria	D_3__Oligoflexales	D_4__Oligoflexaceae	D_5__uncultured bacterium
denovo13198	5	1	0	0	3	0	0	0	2	0	0	0	1	0	0	0	3	0	0	0	D_0__Bacteria	D_1__Proteobacteria	D_2__Deltaproteobacteria	D_3__Oligoflexales	D_4__uncultured bacterium	D_5__uncultured bacterium
denovo13518	5	1	0	0	9	0	0	0	1	0	0	0	2	0	0	0	3	0	0	0	D_0__Bacteria	D_1__Proteobacteria	D_2__Gammaproteobacteria	D_3__Pseudomonadales	D_4__Moraxellaceae	D_5__Acinetobacter
denovo13573	5	0	0	0	7	0	0	0	8	0	0	0	7	0	0	0	7	0	0	0	D_0__Bacteria	D_1__Proteobacteria	D_2__SPOTSOCT00m83	D_3__uncultured bacterium	D_4__uncultured bacterium	D_5__uncultured bacterium
denovo13849	5	0	0	0	5	0	0	0	9	0	0	0	9	0	0	0	17	0	0	0	D_0__Bacteria	D_1__Bacteroidetes	D_2__Flavobacteriia	D_3__Flavobacteriales	D_4__Flavobacteriaceae	D_5__Flavobacterium	D_6__uncultured bacterium
denovo13947	5	0	0	0	1	0	0	0	2	1	0	0	0	0	0	0	1	0	0	0	D_0__Bacteria	D_1__Bacteroidetes	D_2__Bacteroidia	D_3__Bacteroidales	D_4__Rikenellaceae	D_5__vadinBC27 wastewater-sludge group	D_6__uncultured bacterium
denovo14424	5	0	0	0	6	0	0	0	13	0	0	0	4	0	0	0	6	0	0	0	D_0__Bacteria	D_1__Proteobacteria	D_2__Alphaproteobacteria	D_3__Rickettsiales	D_4__AKIW1012	D_5__uncultured alpha proteobacterium
denovo1446	5	0	0	0	1	0	0	0	0	0	0	0	2	0	0	0	0	0	0	0	D_0__Bacteria	D_1__Proteobacteria	D_2__Deltaproteobacteria	D_3__Syntrophobacterales	D_4__Syntrophaceae	D_5__Smithella	D_6__uncultured bacterium
denovo14740	5	0	0	0	3	0	0	0	2	0	0	0	0	0	0	0	0	0	0	0	D_0__Bacteria	D_1__Bacteroidetes	D_2__Bacteroidia	D_3__Bacteroidales	D_4__uncultured	D_5__uncultured bacterium
denovo15023	5	4	0	0	4	0	0	0	1	1	0	0	4	0	0	0	3	0	0	0	D_0__Bacteria	D_1__Firmicutes	D_2__Clostridia	D_3__Clostridiales	D_4__Ruminococcaceae	D_5__Ruminococcaceae UCG-014
denovo15873	5	3	0	0	4	0	0	0	6	1	0	0	5	0	0	0	6	0	0	0	D_0__Bacteria	D_1__Proteobacteria	D_2__Betaproteobacteria	D_3__Burkholderiales	D_4__Comamonadaceae	D_5__uncultured
denovo16025	5	2	0	0	12	0	0	1	16	2	1	0	20	2	0	0	22	3	0	0	D_0__Bacteria	D_1__Proteobacteria	D_2__Alphaproteobacteria	D_3__Caulobacterales	D_4__Caulobacteraceae	D_5__Phenylobacterium	D_6__uncultured bacterium
denovo1628	5	0	0	0	0	0	0	0	8	0	0	0	1	0	0	0	7	0	0	0	D_0__Bacteria	D_1__Proteobacteria	D_2__Alphaproteobacteria	D_3__Rickettsiales	D_4__Rickettsiales Incertae Sedis	D_5__Candidatus Captivus	D_6__uncultured bacterium
denovo16297	5	2	0	0	3	0	0	0	1	0	0	0	1	0	0	0	0	0	0	0	D_0__Bacteria	D_1__Proteobacteria	D_2__Gammaproteobacteria	D_3__Aeromonadales	D_4__Aeromonadaceae	D_5__Aeromonas	D_6__uncultured bacterium
denovo16619	5	0	0	0	1	0	0	0	1	0	0	0	5	0	0	0	2	0	0	0	D_0__Bacteria	D_1__Firmicutes	D_2__Clostridia	D_3__Clostridiales	D_4__Ruminococcaceae	D_5__Ruminococcus 2
denovo16666	5	0	0	0	5	0	0	0	3	3	0	0	6	3	0	0	3	1	0	0	Unassigned
denovo17214	5	2	0	0	6	0	1	0	5	1	0	0	6	0	0	0	8	0	0	0	D_0__Bacteria	D_1__Proteobacteria	D_2__Betaproteobacteria	D_3__Rhodocyclales	D_4__Rhodocyclaceae	D_5__Candidatus Accumulibacter	D_6__uncultured bacterium
denovo17521	5	0	0	0	0	0	0	0	1	0	0	0	0	0	0	0	1	0	0	0	D_0__Bacteria	D_1__Firmicutes	D_2__Negativicutes	D_3__Selenomonadales	D_4__Veillonellaceae	D_5__uncultured
denovo17656	5	1	0	0	4	0	0	0	6	0	0	0	9	0	0	0	6	0	0	0	D_0__Bacteria	D_1__Proteobacteria	D_2__Betaproteobacteria	D_3__Burkholderiales	D_4__Comamonadaceae	D_5__Acidovorax
denovo18074	5	2	0	0	5	0	0	0	2	0	0	0	2	0	0	0	1	0	0	0	D_0__Bacteria	D_1__Proteobacteria	D_2__Gammaproteobacteria	D_3__Xanthomonadales	D_4__Xanthomonadaceae	D_5__uncultured
denovo18362	5	0	0	0	10	0	0	0	12	0	0	0	6	0	0	0	2	0	0	0	D_0__Bacteria	D_1__Bacteroidetes	D_2__Flavobacteriia	D_3__Flavobacteriales	D_4__Flavobacteriaceae	D_5__Flavobacterium	D_6__uncultured epsilon proteobacterium
denovo18571	5	0	0	0	0	0	0	0	2	0	0	0	1	0	0	0	2	0	0	0	D_0__Bacteria	D_1__Proteobacteria	D_2__Betaproteobacteria	D_3__Rhodocyclales	D_4__Rhodocyclaceae	D_5__Candidatus Accumulibacter	D_6__uncultured bacterium
denovo18717	5	0	0	0	3	1	0	0	4	0	1	0	18	0	0	0	9	0	0	0	D_0__Bacteria	D_1__Actinobacteria	D_2__Actinobacteria	D_3__Micrococcales	D_4__Bogoriellaceae	D_5__Georgenia	D_6__uncultured bacterium
denovo18793	5	0	0	0	0	0	0	0	2	0	1	0	1	0	0	0	1	0	0	0	D_0__Bacteria	D_1__Proteobacteria	D_2__Deltaproteobacteria	D_3__Syntrophobacterales	D_4__Syntrophaceae	D_5__Smithella
denovo18966	5	0	0	0	0	0	0	0	1	0	0	0	0	0	0	0	2	0	0	0	D_0__Bacteria	D_1__TM6	D_2__uncultured bacterium	D_3__uncultured bacterium	D_4__uncultured bacterium	D_5__uncultured bacterium	D_6__uncultured organism
denovo1915	5	0	0	0	4	0	0	0	3	0	0	0	3	0	0	0	5	0	0	0	D_0__Bacteria	D_1__Proteobacteria	D_2__Gammaproteobacteria	D_3__Enterobacteriales	D_4__Enterobacteriaceae	D_5__Budvicia	D_6__uncultured bacterium
denovo19858	5	0	0	0	2	0	0	0	4	0	0	0	5	0	0	0	1	0	0	0	D_0__Bacteria	D_1__Bacteroidetes	D_2__Sphingobacteriia	D_3__Sphingobacteriales	D_4__KD3-93	D_5__uncultured bacterium	D_6__uncultured bacterium
denovo20035	5	0	0	0	1	0	0	0	1	0	0	0	1	0	0	0	3	0	0	0	D_0__Bacteria	D_1__Proteobacteria	D_2__Betaproteobacteria	D_3__Burkholderiales	D_4__Comamonadaceae	D_5__uncultured
denovo20062	5	0	0	0	9	0	0	0	5	0	0	0	11	0	0	0	5	0	0	0	D_0__Bacteria	D_1__Proteobacteria	D_2__Alphaproteobacteria	D_3__DB1-14	D_4__uncultured bacterium	D_5__uncultured bacterium
denovo20356	5	0	0	0	3	0	0	0	5	0	0	0	2	0	0	0	2	0	0	0	D_0__Bacteria	D_1__Proteobacteria	D_2__Betaproteobacteria	D_3__Burkholderiales	D_4__Comamonadaceae	D_5__Aquabacterium
denovo20424	5	0	0	1	2	0	0	0	7	0	0	0	2	1	0	0	1	0	0	0	D_0__Bacteria	D_1__SHA-109	D_2__uncultured bacterium	D_3__uncultured bacterium	D_4__uncultured bacterium	D_5__uncultured bacterium	D_6__uncultured bacterium
denovo20563	5	0	0	0	1	0	0	0	5	0	0	0	0	0	0	0	1	0	0	0	D_0__Bacteria	D_1__Bacteroidetes	D_2__Sphingobacteriia	D_3__Sphingobacteriales	D_4__NS11-12 marine group
denovo20818	5	6	5	1	3	1	0	1	9	0	0	0	5	0	0	0	6	1	0	0	D_0__Bacteria	D_1__Proteobacteria	D_2__Alphaproteobacteria	D_3__Rhizobiales	D_4__Phyllobacteriaceae	D_5__Aminobacter	D_6__uncultured bacterium
denovo20954	5	0	0	0	7	0	0	0	6	0	0	0	3	0	0	0	5	0	0	0	D_0__Bacteria	D_1__Bacteroidetes	D_2__Bacteroidia	D_3__Bacteroidales	D_4__Porphyromonadaceae	D_5__Microbacter
denovo21093	5	0	0	0	6	0	0	0	1	0	0	0	7	0	0	0	7	1	0	0	D_0__Bacteria	D_1__Firmicutes	D_2__Clostridia	D_3__Clostridiales	D_4__Christensenellaceae	D_5__Christensenellaceae R-7 group	D_6__uncultured bacterium
denovo21552	5	0	0	0	3	0	0	0	6	0	0	0	3	0	0	0	5	0	0	0	D_0__Bacteria	D_1__Proteobacteria	D_2__Betaproteobacteria	D_3__Burkholderiales	D_4__Comamonadaceae	D_5__Hydrogenophaga
denovo21644	5	0	0	0	5	2	0	0	1	0	0	0	1	2	0	0	1	0	0	0	D_0__Bacteria	D_1__Actinobacteria	D_2__Actinobacteria	D_3__Micrococcales	D_4__Microbacteriaceae	D_5__Leucobacter	D_6__uncultured bacterium
denovo22472	5	126	4	0	4	51	9	1	4	22	12	0	3	28	0	0	7	0	0	0	D_0__Bacteria	D_1__Bacteroidetes	D_2__Bacteroidia	D_3__Bacteroidales	D_4__Prevotellaceae	D_5__Prevotella 7
denovo2248	5	0	0	0	3	0	0	0	6	0	0	0	3	1	0	0	5	1	14	41	D_0__Bacteria	D_1__Firmicutes	D_2__Negativicutes	D_3__Selenomonadales	D_4__Acidaminococcaceae	D_5__Phascolarctobacterium	D_6__uncultured bacterium
denovo2431	5	1	0	0	7	0	0	0	4	0	0	0	5	0	0	0	4	0	0	0	D_0__Bacteria	D_1__Proteobacteria	D_2__Betaproteobacteria	D_3__Neisseriales	D_4__Neisseriaceae	D_5__Vitreoscilla
denovo3114	5	2	0	0	6	2	1	0	4	1	3	0	10	2	2	0	5	2	0	0	D_0__Bacteria	D_1__Actinobacteria	D_2__Actinobacteria	D_3__PeM15	D_4__uncultured bacterium	D_5__uncultured bacterium
denovo3223	5	1	1	0	12	0	0	0	9	0	0	0	13	0	0	0	18	0	0	0	D_0__Bacteria	D_1__Bacteroidetes	D_2__Cytophagia	D_3__Cytophagales	D_4__Cytophagaceae	D_5__uncultured
denovo3783	5	0	0	0	7	0	0	0	3	0	0	0	3	0	0	0	8	0	0	0	D_0__Bacteria	D_1__Proteobacteria	D_2__Deltaproteobacteria	D_3__Myxococcales	D_4__mle1-27	D_5__uncultured bacterium	D_6__uncultured bacterium
denovo4022	5	0	0	0	1	0	0	0	1	0	0	0	1	0	0	0	0	0	0	0	D_0__Bacteria	D_1__Spirochaetae	D_2__Spirochaetes	D_3__Spirochaetales	D_4__PL-11B10	D_5__uncultured bacterium	D_6__uncultured bacterium
denovo4507	5	5	1	1	4	0	0	1	5	0	1	0	2	0	0	0	4	1	0	0	D_0__Bacteria	D_1__Proteobacteria	D_2__Betaproteobacteria	D_3__Burkholderiales	D_4__Comamonadaceae	D_5__Ottowia
denovo4519	5	0	0	0	6	0	0	0	13	0	0	0	4	0	0	0	7	0	0	0	D_0__Bacteria	D_1__Bacteroidetes	D_2__Sphingobacteriia	D_3__Sphingobacteriales	D_4__Sphingobacteriaceae	D_5__Pedobacter
denovo4666	5	0	0	0	2	0	0	0	0	0	0	0	2	0	0	0	3	0	0	0	D_0__Bacteria	D_1__Chloroflexi	D_2__Thermomicrobia	D_3__AKYG1722	D_4__uncultured bacterium	D_5__uncultured bacterium
denovo50	5	2	0	1	10	0	0	0	9	0	0	0	6	0	0	0	8	0	0	0	D_0__Bacteria	D_1__Bacteroidetes	D_2__Sphingobacteriia	D_3__Sphingobacteriales	D_4__Chitinophagaceae	D_5__uncultured	D_6__uncultured bacterium
denovo5481	5	6	0	0	6	0	0	0	7	6	0	0	13	0	0	0	12	0	0	0	D_0__Bacteria	D_1__Firmicutes	D_2__Clostridia	D_3__Clostridiales	D_4__Ruminococcaceae	D_5__Oscillibacter	D_6__uncultured bacterium
denovo5744	5	0	0	0	4	0	0	0	4	0	0	0	2	0	0	0	5	0	0	0	D_0__Bacteria	D_1__Bacteroidetes	D_2__Bacteroidia	D_3__Bacteroidales	D_4__Bacteroidaceae	D_5__Bacteroides	D_6__uncultured bacterium
denovo5940	5	0	0	0	12	0	0	0	2	0	0	0	5	0	0	0	17	0	0	0	D_0__Bacteria	D_1__Bacteroidetes	D_2__Flavobacteriia	D_3__Flavobacteriales	D_4__NS9 marine group	D_5__uncultured bacterium	D_6__uncultured bacterium
denovo599	5	0	0	0	4	0	0	0	3	0	0	0	1	0	0	0	0	0	0	0	D_0__Bacteria	D_1__Firmicutes	D_2__Clostridia	D_3__Clostridiales	D_4__Lachnospiraceae	D_5__Roseburia
denovo6076	5	0	0	0	2	1	1	0	7	4	0	0	0	0	0	0	2	0	0	0	Unassigned						D_6__uncultured bacterium
denovo6316	5	265	7	1	16	69	10	1	2	41	15	0	2	34	1	0	8	1	0	0	D_0__Bacteria	D_1__Bacteroidetes	D_2__Bacteroidia	D_3__Bacteroidales	D_4__Prevotellaceae	D_5__Prevotella 7	D_6__uncultured bacterium
denovo6515	5	0	0	0	2	1	0	0	4	0	0	0	7	0	0	0	4	0	0	0	D_0__Bacteria	D_1__Proteobacteria	D_2__Deltaproteobacteria	D_3__Bdellovibrionales	D_4__Bdellovibrionaceae	D_5__Bdellovibrio	D_6__uncultured rumen bacterium
denovo6860	5	0	0	0	14	1	0	0	12	3	0	0	7	0	0	0	11	0	0	0	D_0__Bacteria	D_1__Firmicutes	D_2__Clostridia	D_3__Clostridiales	D_4__Ruminococcaceae	D_5__uncultured
denovo7014	5	248	11	0	11	53	7	1	7	31	14	0	2	51	0	1	7	0	0	0	D_0__Bacteria	D_1__Bacteroidetes	D_2__Bacteroidia	D_3__Bacteroidales	D_4__Prevotellaceae	D_5__Prevotella 7	D_6__uncultured bacterium
denovo7281	5	2	0	0	12	0	0	0	3	0	0	0	7	1	0	0	2	0	0	0	D_0__Bacteria	D_1__Proteobacteria	D_2__Alphaproteobacteria	D_3__Rickettsiales	D_4__Rickettsiales Incertae Sedis	D_5__Candidatus Captivus
denovo7322	5	4	10	1	4	0	0	0	5	0	0	0	5	0	2	9	3	174	879	1358	D_0__Bacteria	D_1__Firmicutes	D_2__Clostridia	D_3__Clostridiales	D_4__Lachnospiraceae	D_5__Blautia
denovo7492	5	0	0	0	2	0	0	0	2	0	0	0	2	0	0	0	3	0	0	0	D_0__Bacteria	D_1__Planctomycetes	D_2__OM190	D_3__uncultured bacterium	D_4__uncultured bacterium	D_5__uncultured bacterium
denovo790	5	5	0	0	2	1	0	0	8	0	0	0	4	0	0	0	6	0	0	0	D_0__Bacteria	D_1__Proteobacteria	D_2__Betaproteobacteria	D_3__Rhodocyclales	D_4__Rhodocyclaceae	D_5__Thauera
denovo8290	5	0	0	0	0	0	0	0	24	1	1	0	4	0	0	0	5	0	0	0	D_0__Bacteria	D_1__Bacteroidetes	D_2__Bacteroidia	D_3__Bacteroidales	D_4__p-2534-18B5 gut group	D_5__uncultured bacterium
denovo9431	5	1	0	0	3	0	0	0	1	3	2	0	8	0	0	0	0	3	0	0	D_0__Bacteria	D_1__Firmicutes	D_2__Clostridia	D_3__Clostridiales	D_4__Ruminococcaceae	D_5__Ruminococcaceae V9D2013 group	D_6__uncultured bacterium
denovo9772	5	0	0	0	6	0	0	0	4	0	0	0	4	0	0	0	3	0	0	0	D_0__Bacteria	D_1__Proteobacteria	D_2__Gammaproteobacteria	D_3__Xanthomonadales	D_4__Xanthomonadaceae	D_5__Pseudofulvimonas
denovo10078	4	0	0	0	0	0	0	0	0	0	0	0	0	0	0	0	1	0	0	0	D_0__Bacteria	D_1__Proteobacteria	D_2__Deltaproteobacteria	D_3__Myxococcales	D_4__Haliangiaceae	D_5__Haliangium
denovo10132	4	0	0	0	1	0	0	0	0	0	0	0	0	0	0	0	1	0	0	0	D_0__Bacteria	D_1__Proteobacteria	D_2__Deltaproteobacteria	D_3__Bdellovibrionales	D_4__Bacteriovoracaceae	D_5__Bacteriovorax
denovo10570	4	0	0	0	3	0	0	0	1	0	0	0	0	0	0	0	0	0	0	0	D_0__Bacteria	D_1__Proteobacteria	D_2__Deltaproteobacteria	D_3__Myxococcales	D_4__Polyangiaceae	D_5__Sorangium	D_6__uncultured bacterium
denovo10642	4	11	3	4	0	3	0	0	3	1	0	0	0	0	0	0	1	0	0	0	D_0__Bacteria	D_1__Proteobacteria	D_2__Gammaproteobacteria	D_3__Xanthomonadales	D_4__Xanthomonadaceae	D_5__Arenimonas
denovo10988	4	0	0	0	1	0	0	0	0	0	0	0	2	0	0	0	3	0	0	0	D_0__Bacteria	D_1__Verrucomicrobia	D_2__OPB35 soil group	D_3__uncultured bacterium	D_4__uncultured bacterium	D_5__uncultured bacterium
denovo11056	4	5	0	0	5	0	0	0	5	0	0	0	3	0	0	0	4	0	0	0	D_0__Bacteria	D_1__Firmicutes	D_2__Clostridia	D_3__Clostridiales	D_4__Ruminococcaceae	D_5__[Eubacterium] coprostanoligenes group
denovo11330	4	0	0	0	4	0	0	0	4	0	0	0	4	0	0	0	2	0	0	0	D_0__Bacteria	D_1__Proteobacteria	D_2__Alphaproteobacteria	D_3__DB1-14	D_4__uncultured bacterium	D_5__uncultured bacterium	D_6__uncultured bacterium
denovo1153	4	0	0	0	4	0	0	0	5	0	0	0	5	0	0	0	3	0	1	0	D_0__Bacteria	D_1__Proteobacteria	D_2__Betaproteobacteria	D_3__Rhodocyclales	D_4__Rhodocyclaceae	D_5__uncultured
denovo11968	4	0	1	0	5	0	0	0	3	0	1	0	1	2	2	0	3	7	0	1	D_0__Bacteria	D_1__Bacteroidetes	D_2__Bacteroidia	D_3__Bacteroidales	D_4__Prevotellaceae	D_5__Prevotella 7
denovo12054	4	0	0	0	0	0	0	0	0	0	0	0	0	0	0	0	3	0	0	0	D_0__Bacteria	D_1__Bacteroidetes	D_2__Sphingobacteriia	D_3__Sphingobacteriales	D_4__WCHB1-69		D_6__uncultured bacterium
denovo12097	4	1	0	0	9	0	0	0	4	0	0	0	8	1	0	0	7	0	0	0	D_0__Bacteria	D_1__Actinobacteria	D_2__Actinobacteria	D_3__Actinomycetales	D_4__Actinomycetaceae	D_5__uncultured Actinomycetaceae bacterium
denovo12160	4	3	0	0	2	2	0	0	5	0	0	0	2	0	0	0	1	0	0	0	D_0__Bacteria	D_1__Proteobacteria	D_2__Alphaproteobacteria	D_3__Rickettsiales	D_4__Holosporaceae	D_5__uncultured	D_6__uncultured bacterium
denovo12252	4	0	0	0	3	0	0	0	4	0	0	0	4	0	0	0	4	0	0	0	D_0__Bacteria	D_1__Verrucomicrobia	D_2__OPB35 soil group	D_3__uncultured bacterium	D_4__uncultured bacterium	D_5__uncultured bacterium
denovo12295	4	0	0	0	4	0	0	0	0	0	0	0	0	0	0	0	0	0	0	0	D_0__Bacteria	D_1__Bacteroidetes	D_2__Bacteroidia	D_3__Bacteroidales			D_6__uncultured bacterium
denovo1287	4	0	0	0	3	0	0	0	7	0	0	0	5	0	0	0	1	0	0	0	D_0__Bacteria	D_1__Proteobacteria	D_2__Deltaproteobacteria	D_3__Bdellovibrionales	D_4__Bdellovibrionaceae	D_5__Bdellovibrio	D_6__uncultured bacterium
denovo13012	4	2	0	0	8	2	0	2	5	2	1	0	4	1	0	0	7	2	0	0	D_0__Bacteria	D_1__Proteobacteria	D_2__Deltaproteobacteria	D_3__Desulfovibrionales	D_4__Desulfovibrionaceae	D_5__Desulfovibrio	D_6__uncultured bacterium
denovo13069	4	3	0	0	8	4	0	0	10	0	0	0	8	4	0	0	9	0	3	0	D_0__Bacteria	D_1__Firmicutes	D_2__Clostridia	D_3__Clostridiales	D_4__Lachnospiraceae	D_5__Lachnospiraceae NK3A20 group
denovo13175	4	1	0	0	3	0	0	0	2	0	0	0	2	0	0	0	6	0	0	0	D_0__Bacteria	D_1__Proteobacteria	D_2__Alphaproteobacteria	D_3__Rhizobiales	D_4__Rhizobiaceae	D_5__Rhizobium	D_6__uncultured bacterium
denovo13398	4	0	0	0	0	0	0	0	2	0	0	0	1	0	0	0	2	0	0	0	D_0__Bacteria	D_1__Proteobacteria	D_2__Alphaproteobacteria	D_3__Rhodospirillales	D_4__I-10	D_5__uncultured bacterium	D_6__uncultured bacterium
denovo13653	4	0	0	0	4	0	0	0	2	0	0	0	1	0	0	0	7	0	0	0	D_0__Bacteria	D_1__Chloroflexi	D_2__Caldilineae	D_3__Caldilineales	D_4__Caldilineaceae	D_5__uncultured	D_6__uncultured bacterium
denovo13757	4	2	0	0	2	0	0	0	4	0	0	0	7	0	0	0	0	0	0	0	D_0__Bacteria	D_1__Proteobacteria	D_2__Betaproteobacteria	D_3__Rhodocyclales	D_4__Rhodocyclaceae	D_5__Denitratisoma	D_6__uncultured compost bacterium
denovo13787	4	1	0	0	11	0	0	0	5	0	0	0	4	0	0	0	4	0	0	0	D_0__Bacteria	D_1__Proteobacteria	D_2__Deltaproteobacteria	D_3__Desulfovibrionales	D_4__Desulfovibrionaceae	D_5__Desulfovibrio	D_6__uncultured bacterium
denovo13826	4	1	0	0	0	1	0	0	6	1	0	0	4	0	0	0	4	0	0	0	D_0__Bacteria	D_1__Firmicutes	D_2__Clostridia	D_3__Clostridiales	D_4__Ruminococcaceae	D_5__Ruminococcaceae UCG-014	D_6__uncultured bacterium
denovo13925	4	0	2	0	0	0	0	0	4	0	0	0	1	0	0	0	1	0	0	0	D_0__Bacteria	D_1__Proteobacteria	D_2__Betaproteobacteria	D_3__Rhodocyclales	D_4__Rhodocyclaceae	D_5__Candidatus Accumulibacter	D_6__uncultured bacterium
denovo14048	4	0	0	0	0	0	0	0	0	0	0	0	0	0	0	0	0	0	0	0	D_0__Bacteria	D_1__Firmicutes	D_2__Clostridia	D_3__Clostridiales	D_4__Lachnospiraceae	D_5__Lachnoclostridium	D_6__uncultured bacterium
denovo14200	4	0	0	0	9	0	0	0	4	0	0	0	8	0	0	0	2	0	0	0	D_0__Bacteria	D_1__Planctomycetes	D_2__OM190	D_3__uncultured bacterium	D_4__uncultured bacterium	D_5__uncultured bacterium
denovo14219	4	2	0	0	3	0	0	0	1	0	0	0	2	0	0	0	1	0	0	0	D_0__Bacteria	D_1__Verrucomicrobia	D_2__Verrucomicrobiae	D_3__Verrucomicrobiales	D_4__Verrucomicrobiaceae	D_5__Akkermansia	D_6__uncultured bacterium
denovo14220	4	0	0	0	0	0	0	0	0	0	0	0	0	0	0	0	1	0	0	0	D_0__Bacteria	D_1__Firmicutes	D_2__Clostridia	D_3__Clostridiales	D_4__Ruminococcaceae	D_5__uncultured	D_6__uncultured bacterium
denovo14591	4	0	0	0	0	0	0	0	1	0	0	0	1	0	0	0	0	0	0	0	D_0__Bacteria	D_1__Proteobacteria	D_2__Gammaproteobacteria	D_3__Enterobacteriales	D_4__Enterobacteriaceae		D_6__uncultured bacterium
denovo14713	4	0	0	0	2	0	0	0	3	1	0	0	0	1	0	0	4	0	0	0	D_0__Bacteria	D_1__Firmicutes	D_2__Clostridia	D_3__Clostridiales	D_4__Family XIII	D_5__[Eubacterium] nodatum group	D_6__uncultured bacterium
denovo15142	4	0	0	0	0	0	0	0	4	0	0	0	3	0	0	0	1	0	0	0	D_0__Bacteria	D_1__Actinobacteria	D_2__Acidimicrobiia	D_3__Acidimicrobiales	D_4__uncultured	D_5__uncultured bacterium
denovo15471	4	0	0	0	1	0	0	0	4	0	0	0	1	0	0	0	1	0	0	0	D_0__Bacteria	D_1__Proteobacteria	D_2__Gammaproteobacteria	D_3__Pseudomonadales	D_4__Pseudomonadaceae	D_5__Pseudomonas
denovo15484	4	0	0	0	2	0	0	0	3	0	0	0	5	0	0	0	4	0	0	0	D_0__Bacteria	D_1__Gemmatimonadetes	D_2__Gemmatimonadetes	D_3__Gemmatimonadales	D_4__Gemmatimonadaceae	D_5__uncultured
denovo15488	4	2	0	0	4	0	0	0	6	0	0	0	9	0	0	0	7	1	5	1	D_0__Bacteria	D_1__Firmicutes	D_2__Negativicutes	D_3__Selenomonadales	D_4__Veillonellaceae	D_5__Dialister
denovo16282	4	3	0	0	5	1	0	0	3	2	0	0	0	0	1	0	3	1	0	0	D_0__Bacteria	D_1__Proteobacteria	D_2__Alphaproteobacteria	D_3__Sphingomonadales	D_4__Sphingomonadaceae	D_5__Sphingopyxis
denovo16302	4	0	0	0	2	0	0	0	4	0	0	0	2	0	0	0	3	0	0	0	D_0__Bacteria	D_1__Firmicutes	D_2__Clostridia	D_3__Clostridiales	D_4__Ruminococcaceae	D_5__Ruminococcus 1
denovo16315	4	0	0	0	6	0	0	0	3	0	0	0	5	0	0	0	4	1	0	0	D_0__Bacteria	D_1__Bacteroidetes	D_2__Bacteroidia	D_3__Bacteroidales	D_4__Rikenellaceae	D_5__Alistipes	D_6__uncultured bacterium
denovo16888	4	0	0	0	2	0	0	0	6	0	0	0	5	0	0	0	1	0	0	0	D_0__Bacteria	D_1__Proteobacteria	D_2__Deltaproteobacteria	D_3__Myxococcales	D_4__Sandaracinaceae	D_5__Sandaracinus	D_6__uncultured bacterium
denovo16982	4	0	0	0	2	0	0	0	2	0	0	0	0	0	0	0	1	0	0	0	D_0__Bacteria	D_1__Actinobacteria	D_2__Actinobacteria	D_3__Micrococcales	D_4__Dermatophilaceae	D_5__Mobilicoccus
denovo17073	4	0	0	1	1	0	0	0	2	1	0	0	3	3	0	0	6	1056	189	2	D_0__Bacteria	D_1__Firmicutes	D_2__Negativicutes	D_3__Selenomonadales	D_4__Acidaminococcaceae	D_5__Phascolarctobacterium
denovo17115	4	0	0	0	3	0	0	0	2	0	0	0	5	0	0	0	3	0	0	0	Unassigned
denovo17491	4	0	0	0	0	0	0	0	1	0	0	0	0	0	0	0	1	0	0	0	D_0__Bacteria	D_1__Proteobacteria	D_2__Deltaproteobacteria	D_3__Oligoflexales	D_4__Oligoflexaceae	D_5__uncultured bacterium
denovo17508	4	1	0	0	1	1	0	1	0	0	0	0	0	0	0	0	0	0	0	0	D_0__Bacteria	D_1__Actinobacteria	D_2__Actinobacteria	D_3__Frankiales	D_4__Cryptosporangiaceae	D_5__Fodinicola
denovo17652	4	0	0	0	3	0	0	0	4	0	0	0	1	0	0	0	3	0	0	0	D_0__Bacteria	D_1__Bacteroidetes	D_2__Sphingobacteriia	D_3__Sphingobacteriales	D_4__Chitinophagaceae	D_5__uncultured	D_6__uncultured bacterium
denovo17898	4	0	0	0	0	0	0	0	0	0	0	0	0	0	0	0	0	0	0	0	D_0__Bacteria	D_1__Proteobacteria	D_2__Gammaproteobacteria	D_3__Enterobacteriales	D_4__Enterobacteriaceae	D_5__Serratia	D_6__uncultured bacterium
denovo1800	4	1	0	0	7	0	0	0	5	0	0	0	5	0	0	0	7	0	0	0	D_0__Bacteria	D_1__Firmicutes	D_2__Clostridia	D_3__Clostridiales	D_4__Lachnospiraceae	D_5__Lachnospira
denovo18049	4	0	0	0	3	0	0	0	3	0	1	0	2	0	0	0	2	0	0	0	D_0__Bacteria	D_1__Proteobacteria	D_2__Betaproteobacteria	D_3__Burkholderiales	D_4__Comamonadaceae	D_5__Acidovorax
denovo18083	4	0	0	0	0	0	1	0	0	0	0	0	0	0	0	0	2	0	0	0	D_0__Bacteria	D_1__Actinobacteria	D_2__Actinobacteria	D_3__Propionibacteriales	D_4__Nocardioidaceae	D_5__Aeromicrobium	D_6__uncultured bacterium
denovo18242	4	4	0	0	2	0	0	0	7	0	0	0	7	0	0	0	1	0	0	0	D_0__Bacteria	D_1__Proteobacteria	D_2__Gammaproteobacteria	D_3__NKB5	D_4__uncultured bacterium	D_5__uncultured bacterium	D_6__uncultured bacterium
denovo18282	4	0	0	0	0	0	0	0	0	0	0	0	1	0	0	0	0	0	0	0	D_0__Bacteria	D_1__Lentisphaerae	D_2__Lentisphaerae RFP12 gut group	D_3__uncultured bacterium	D_4__uncultured bacterium	D_5__uncultured bacterium	D_6__uncultured bacterium
denovo18290	4	0	0	0	16	0	0	0	24	1	0	0	21	0	0	0	22	0	0	0	D_0__Bacteria	D_1__Bacteroidetes	D_2__Sphingobacteriia	D_3__Sphingobacteriales	D_4__Saprospiraceae	D_5__uncultured
denovo18392	4	3	3	0	0	0	0	0	0	1	0	0	0	0	0	0	0	0	0	0	D_0__Bacteria	D_1__Bacteroidetes	D_2__Sphingobacteriia	D_3__Sphingobacteriales	D_4__Saprospiraceae	D_5__uncultured	D_6__uncultured bacterium
denovo1853	4	1	0	1	3	3	0	0	4	1	1	0	2	0	0	0	7	0	0	0	D_0__Bacteria	D_1__Firmicutes	D_2__Clostridia	D_3__Clostridiales	D_4__Eubacteriaceae	D_5__Acetobacterium	D_6__uncultured rumen bacterium
denovo18631	4	0	0	0	2	0	0	0	1	0	0	0	1	0	0	0	3	0	0	0	Unassigned
denovo18883	4	3	0	0	10	41	5	10	3	45	4	0	2	137	4	0	2	22	2	0	D_0__Bacteria	D_1__Firmicutes	D_2__Negativicutes	D_3__Selenomonadales	D_4__Veillonellaceae	D_5__uncultured	D_6__uncultured organism
denovo1920	4	0	0	0	5	0	0	0	3	0	0	0	6	0	0	0	2	0	0	0	D_0__Bacteria	D_1__Firmicutes	D_2__Clostridia	D_3__Clostridiales	D_4__Clostridiales vadinBB60 group	D_5__uncultured bacterium
denovo19255	4	1	0	0	1	1	0	0	3	0	0	0	2	0	0	0	7	1	0	0	D_0__Bacteria	D_1__Bacteroidetes	D_2__Flavobacteriia	D_3__Flavobacteriales	D_4__Flavobacteriaceae	D_5__Chryseobacterium
denovo19475	4	0	0	0	1	0	0	0	9	0	0	0	2	0	0	0	1	0	0	0	D_0__Bacteria	D_1__Firmicutes	D_2__Clostridia	D_3__Clostridiales	D_4__Lachnospiraceae	D_5__Lachnospira	D_6__uncultured bacterium
denovo19602	4	0	0	0	0	0	0	0	0	0	0	0	2	0	0	0	5	0	0	0	D_0__Bacteria	D_1__Proteobacteria	D_2__Gammaproteobacteria	D_3__Legionellales	D_4__Coxiellaceae	D_5__Aquicella	D_6__uncultured bacterium
denovo19645	4	1	0	0	1	0	0	1	0	3	0	0	2	0	0	0	1	1	0	0	D_0__Bacteria	D_1__Firmicutes	D_2__Negativicutes	D_3__Selenomonadales	D_4__Acidaminococcaceae	D_5__Succiniclasticum	D_6__uncultured Saprospiraceae bacterium
denovo1969	4	1	0	0	1	2	0	0	1	4	0	0	3	0	0	0	9	5	0	0	D_0__Bacteria	D_1__Firmicutes	D_2__Clostridia	D_3__Clostridiales	D_4__Clostridiaceae 1	D_5__Clostridium sensu stricto 12
denovo19877	4	0	0	0	1	0	0	0	0	0	0	0	0	0	0	0	0	0	0	0	D_0__Bacteria	D_1__Tenericutes	D_2__Mollicutes	D_3__Mollicutes RF9	D_4__uncultured bacterium	D_5__uncultured bacterium
denovo19998	4	0	0	0	0	0	0	0	0	0	0	0	0	0	0	0	1	0	0	0	D_0__Bacteria	D_1__Parcubacteria	D_2__uncultured bacterium	D_3__uncultured bacterium	D_4__uncultured bacterium	D_5__uncultured bacterium
denovo20148	4	0	1	0	3	0	0	0	0	0	0	0	1	0	0	0	2	0	0	0	D_0__Bacteria	D_1__Proteobacteria	D_2__Alphaproteobacteria	D_3__Rhizobiales	D_4__Hyphomicrobiaceae	D_5__Hyphomicrobium	D_6__uncultured bacterium
denovo20644	4	2	1	0	2	0	0	0	3	0	0	0	4	0	0	0	1	2	0	1	D_0__Bacteria	D_1__Actinobacteria	D_2__Actinobacteria	D_3__Bifidobacteriales	D_4__Bifidobacteriaceae	D_5__Bifidobacterium
denovo20923	4	0	0	0	6	0	0	0	3	0	0	0	3	0	0	0	3	0	1	1	D_0__Bacteria	D_1__Firmicutes	D_2__Clostridia	D_3__Clostridiales	D_4__Lachnospiraceae	D_5__Lachnoclostridium
denovo21268	4	0	0	0	3	0	0	0	2	0	0	0	2	0	0	0	4	0	0	0	D_0__Bacteria	D_1__Bacteroidetes	D_2__Sphingobacteriia	D_3__Sphingobacteriales	D_4__WCHB1-69	D_5__uncultured bacterium
denovo21592	4	0	0	0	1	0	1	0	2	0	0	0	1	0	0	0	4	0	0	0	D_0__Bacteria	D_1__Proteobacteria	D_2__Deltaproteobacteria	D_3__Oligoflexales	D_4__uncultured bacterium	D_5__uncultured bacterium	D_6__uncultured bacterium
denovo21689	4	0	0	0	0	0	0	0	4	1	0	0	2	0	0	0	3	0	1	0	D_0__Bacteria	D_1__Firmicutes	D_2__Clostridia	D_3__Clostridiales	D_4__Ruminococcaceae	D_5__Ruminiclostridium 5	D_6__uncultured bacterium
denovo21729	4	11	1	6	1	0	1	0	5	0	1	0	0	0	0	0	1	1	0	0	D_0__Bacteria	D_1__Proteobacteria	D_2__Betaproteobacteria	D_3__Nitrosomonadales	D_4__Nitrosomonadaceae	D_5__Nitrosomonas	D_6__uncultured rumen bacterium
denovo21838	4	0	0	1	18	0	0	0	6	0	0	0	5	1	0	0	10	0	0	0	D_0__Bacteria	D_1__Proteobacteria	D_2__Gammaproteobacteria	D_3__Xanthomonadales	D_4__Xanthomonadaceae	D_5__uncultured	D_6__uncultured bacterium
denovo22348	4	0	0	0	5	1	0	0	0	0	0	0	1	0	0	0	2	0	0	0	D_0__Bacteria	D_1__Bacteroidetes	D_2__Bacteroidia	D_3__Bacteroidales	D_4__Bacteroidaceae	D_5__Bacteroides
denovo2264	4	2	0	0	7	0	1	0	3	0	1	0	3	0	0	0	14	0	0	1	D_0__Bacteria	D_1__Saccharibacteria	D_2__uncultured bacterium	D_3__uncultured bacterium	D_4__uncultured bacterium	D_5__uncultured bacterium	D_6__uncultured bacterium
denovo2648	4	0	0	0	6	4	4	0	2	0	1	0	6	1	0	0	5	1	0	0	D_0__Bacteria	D_1__Proteobacteria	D_2__Alphaproteobacteria	D_3__Sphingomonadales			D_6__uncultured bacterium
denovo2749	4	0	0	0	1	0	0	0	5	3	0	0	0	1	0	0	2	0	0	0	D_0__Bacteria	D_1__Tenericutes	D_2__Mollicutes	D_3__Mollicutes RF9			D_6__uncultured bacterium
denovo3303	4	0	0	0	1	0	0	0	1	0	0	0	0	0	0	0	0	0	0	0	D_0__Bacteria	D_1__Proteobacteria	D_2__Deltaproteobacteria	D_3__Oligoflexales	D_4__uncultured bacterium	D_5__uncultured bacterium	D_6__uncultured Clostridium sp.
denovo3351	4	0	0	0	5	0	0	0	3	0	0	0	9	0	0	0	3	0	0	0	D_0__Bacteria	D_1__Firmicutes	D_2__Clostridia	D_3__Clostridiales	D_4__Lachnospiraceae
denovo352	4	0	0	0	2	1	0	0	1	1	0	0	4	0	0	0	1	0	1	0	D_0__Bacteria	D_1__Proteobacteria	D_2__Alphaproteobacteria	D_3__Caulobacterales	D_4__Caulobacteraceae	D_5__uncultured
denovo3681	4	0	0	0	3	1	0	0	1	0	0	0	2	0	0	0	2	0	0	0	D_0__Bacteria	D_1__Proteobacteria	D_2__Betaproteobacteria	D_3__Nitrosomonadales	D_4__Nitrosomonadaceae	D_5__uncultured	D_6__uncultured bacterium
denovo3718	4	0	0	0	0	0	0	0	4	0	0	0	1	0	0	0	4	0	0	0	D_0__Bacteria	D_1__Proteobacteria	D_2__Alphaproteobacteria	D_3__DB1-14	D_4__uncultured bacterium	D_5__uncultured bacterium	D_6__uncultured Actinomycetaceae bacterium
denovo382	4	0	0	0	8	2	0	0	9	1	1	0	4	0	0	0	4	0	1	0	D_0__Bacteria	D_1__Saccharibacteria	D_2__uncultured bacterium	D_3__uncultured bacterium	D_4__uncultured bacterium	D_5__uncultured bacterium
denovo3914	4	1	0	0	5	0	0	0	3	0	0	0	0	0	0	0	2	0	0	0	D_0__Bacteria	D_1__Verrucomicrobia	D_2__Verrucomicrobiae	D_3__Verrucomicrobiales	D_4__Verrucomicrobiaceae	D_5__Prosthecobacter
denovo4555	4	2	0	0	18	0	0	0	9	0	0	0	11	0	0	0	9	1	0	0	D_0__Bacteria	D_1__Proteobacteria	D_2__Alphaproteobacteria	D_3__Rhodospirillales	D_4__I-10	D_5__uncultured bacterium	D_6__uncultured bacterium
denovo4567	4	0	0	0	4	0	0	0	5	0	0	0	2	0	0	0	2	0	0	0	D_0__Bacteria	D_1__Bacteroidetes	D_2__Bacteroidia	D_3__Bacteroidales	D_4__Porphyromonadaceae		D_6__uncultured bacterium
denovo4664	4	0	0	0	11	0	0	0	6	0	0	0	10	0	0	0	8	0	0	0	Unassigned						D_6__uncultured bacterium
denovo5303	4	0	0	0	1	0	0	0	2	0	0	0	0	0	0	0	1	0	0	0	D_0__Bacteria	D_1__Proteobacteria	D_2__Betaproteobacteria	D_3__Burkholderiales	D_4__Comamonadaceae	D_5__Leptothrix	D_6__uncultured bacterium
denovo5645	4	1	0	0	8	0	0	0	7	0	0	0	4	0	0	0	8	0	0	0	D_0__Bacteria	D_1__Proteobacteria	D_2__Betaproteobacteria	D_3__Rhodocyclales	D_4__Rhodocyclaceae	D_5__Candidatus Accumulibacter
denovo6387	4	0	0	0	3	1	0	0	4	0	0	0	6	0	0	1	1	0	0	0	D_0__Bacteria	D_1__Actinobacteria	D_2__Actinobacteria	D_3__Propionibacteriales	D_4__Propionibacteriaceae	D_5__Tessaracoccus	D_6__uncultured bacterium
denovo6826	4	0	0	0	1	0	0	0	1	0	0	0	0	0	0	0	0	0	0	0	D_0__Bacteria	D_1__Proteobacteria	D_2__Gammaproteobacteria	D_3__B38	D_4__uncultured bacterium	D_5__uncultured bacterium
denovo7003	4	0	0	0	4	0	0	0	1	0	0	0	0	0	0	0	4	0	0	0	Unassigned						D_6__uncultured bacterium
denovo7177	4	1	0	0	0	0	0	0	1	0	0	0	0	0	0	0	1	0	0	0	D_0__Bacteria	D_1__Proteobacteria	D_2__Deltaproteobacteria	D_3__Myxococcales	D_4__Blfdi19	D_5__uncultured bacterium	D_6__uncultured bacterium
denovo7539	4	1	0	0	4	0	0	0	4	0	0	0	4	0	0	0	3	0	0	0	D_0__Bacteria	D_1__Proteobacteria	D_2__Betaproteobacteria	D_3__Burkholderiales	D_4__Comamonadaceae
denovo7561	4	1	0	0	5	0	0	0	2	1	0	0	0	2	0	0	1	0	0	0	D_0__Bacteria	D_1__Proteobacteria	D_2__Alphaproteobacteria	D_3__Rhizobiales	D_4__Methylobacteriaceae	D_5__Meganema	D_6__uncultured bacterium
denovo7662	4	0	0	0	0	2	0	0	1	0	0	0	1	0	0	0	1	0	0	0	D_0__Bacteria	D_1__Proteobacteria	D_2__Gammaproteobacteria	D_3__Legionellales	D_4__Coxiellaceae	D_5__uncultured	D_6__uncultured bacterium
denovo7939	4	0	0	0	1	0	0	0	1	0	0	0	1	0	0	0	2	0	0	0	D_0__Bacteria	D_1__Planctomycetes	D_2__Phycisphaerae	D_3__Phycisphaerales	D_4__Phycisphaeraceae	D_5__SM1A02
denovo8000	4	0	0	0	2	0	0	0	3	1	0	0	1	0	0	0	7	42	31	1	D_0__Bacteria	D_1__Firmicutes	D_2__Clostridia	D_3__Clostridiales	D_4__Lachnospiraceae	D_5__[Ruminococcus] gauvreauii group
denovo8503	4	1	0	0	4	0	0	0	11	0	0	0	18	0	0	0	10	0	0	0	D_0__Bacteria	D_1__Bacteroidetes	D_2__Flavobacteriia	D_3__Flavobacteriales	D_4__NS9 marine group	D_5__uncultured bacterium	D_6__uncultured bacterium
denovo8622	4	6	0	0	6	0	0	0	4	1	0	0	4	0	1	0	5	1	0	0	D_0__Bacteria	D_1__Proteobacteria	D_2__Alphaproteobacteria	D_3__Rhizobiales	D_4__Methylocystaceae	D_5__Pleomorphomonas	D_6__uncultured bacterium
denovo8837	4	0	0	0	7	1	0	0	5	3	0	0	5	1	0	0	1	0	0	0	D_0__Bacteria	D_1__Saccharibacteria	D_2__uncultured bacterium	D_3__uncultured bacterium	D_4__uncultured bacterium	D_5__uncultured bacterium	D_6__uncultured bacterium
denovo8853	4	0	0	0	8	1	0	0	9	0	0	0	9	0	0	0	8	0	0	0	D_0__Bacteria	D_1__WCHB1-60	D_2__uncultured bacterium	D_3__uncultured bacterium	D_4__uncultured bacterium	D_5__uncultured bacterium	D_6__uncultured bacterium
denovo8866	4	0	0	0	3	0	0	0	0	0	0	0	2	0	0	0	1	0	0	0	D_0__Bacteria	D_1__Proteobacteria	D_2__Betaproteobacteria	D_3__Rhodocyclales	D_4__Rhodocyclaceae
denovo8901	4	1	0	0	0	0	0	0	1	0	0	0	1	0	0	0	0	0	0	0	D_0__Bacteria	D_1__Proteobacteria	D_2__Deltaproteobacteria	D_3__Bdellovibrionales	D_4__Bacteriovoracaceae	D_5__Peredibacter
denovo8954	4	0	0	0	9	0	0	0	22	1	0	0	7	0	0	0	13	0	0	0	D_0__Bacteria	D_1__Lentisphaerae	D_2__Lentisphaerae RFP12 gut group				D_6__uncultured bacterium
denovo9365	4	0	0	0	2	0	0	0	6	0	0	0	0	0	0	0	1	0	0	0	Unassigned						D_6__uncultured rumen bacterium
denovo1016	3	1	0	0	1	0	0	0	2	0	0	0	1	0	0	0	1	0	0	0	D_0__Bacteria	D_1__Proteobacteria	D_2__Gammaproteobacteria	D_3__Oceanospirillales	D_4__Halomonadaceae	D_5__Halomonas
denovo10239	3	0	0	0	3	0	0	0	2	0	0	0	3	0	0	0	2	0	1	0	D_0__Bacteria	D_1__Proteobacteria	D_2__Deltaproteobacteria	D_3__Desulfobacterales	D_4__Desulfobulbaceae	D_5__Desulfotalea
denovo10320	3	0	0	0	7	0	0	0	4	0	0	0	2	0	0	0	7	0	0	0	D_0__Bacteria	D_1__Proteobacteria	D_2__Deltaproteobacteria	D_3__Myxococcales	D_4__Haliangiaceae	D_5__Haliangium	D_6__uncultured bacterium
denovo10833	3	0	0	0	0	0	0	0	1	0	0	0	2	0	0	0	0	0	0	0	D_0__Bacteria	D_1__Actinobacteria	D_2__Actinobacteria	D_3__Frankiales	D_4__Frankiaceae	D_5__Jatrophihabitans
denovo1087	3	0	0	0	4	0	0	0	3	0	0	0	1	0	0	0	2	0	0	0	D_0__Bacteria	D_1__Proteobacteria	D_2__Betaproteobacteria	D_3__Burkholderiales	D_4__Comamonadaceae	D_5__uncultured
denovo1101	3	0	0	0	1	0	0	0	2	0	0	0	2	0	0	0	3	0	0	1	D_0__Bacteria	D_1__Saccharibacteria	D_2__uncultured bacterium	D_3__uncultured bacterium	D_4__uncultured bacterium	D_5__uncultured bacterium	D_6__uncultured Comamonadaceae bacterium
denovo11053	3	0	0	0	0	2	1	0	3	1	0	0	1	0	0	0	0	0	0	0	D_0__Bacteria	D_1__Proteobacteria	D_2__Alphaproteobacteria	D_3__Sphingomonadales	D_4__Sphingomonadaceae	D_5__Sphingopyxis	D_6__uncultured bacterium
denovo11111	3	1	0	0	2	0	0	0	5	0	0	0	2	0	0	0	2	0	0	0	D_0__Bacteria	D_1__Bacteroidetes	D_2__Bacteroidia	D_3__Bacteroidales	D_4__Porphyromonadaceae	D_5__Dysgonomonas	D_6__uncultured bacterium
denovo11228	3	0	1	0	2	0	0	0	1	0	0	0	4	1	0	0	2	0	0	0	D_0__Bacteria	D_1__Proteobacteria	D_2__Alphaproteobacteria	D_3__Rickettsiales	D_4__Rickettsiales Incertae Sedis		D_6__uncultured bacterium
denovo11283	3	0	0	0	4	0	0	0	0	0	0	0	0	0	0	0	3	0	0	0	D_0__Bacteria	D_1__Proteobacteria	D_2__Alphaproteobacteria	D_3__Rickettsiales	D_4__Rickettsiaceae	D_5__uncultured
denovo11389	3	0	0	0	0	0	0	0	3	0	0	0	3	0	0	0	1	0	0	0	Unassigned						D_6__uncultured bacterium
denovo11468	3	0	0	0	6	0	0	0	3	0	0	0	6	0	0	0	11	0	0	0	D_0__Bacteria	D_1__Bacteroidetes	D_2__Flavobacteriia	D_3__Flavobacteriales	D_4__NS9 marine group	D_5__uncultured Bacteroidetes bacterium	D_6__uncultured bacterium
denovo11514	3	1	0	0	4	1	0	0	0	0	0	0	2	0	0	0	1	0	0	0	D_0__Bacteria	D_1__Proteobacteria	D_2__Betaproteobacteria	D_3__Burkholderiales	D_4__Comamonadaceae	D_5__Albidiferax	D_6__uncultured bacterium
denovo11571	3	0	0	0	3	0	0	0	5	2	1	0	4	0	0	0	1	0	1	0	D_0__Bacteria	D_1__Tenericutes	D_2__Mollicutes	D_3__Mollicutes RF9	D_4__uncultured bacterium	D_5__uncultured bacterium	D_6__uncultured bacterium
denovo11595	3	0	0	0	3	0	0	0	6	0	0	0	1	0	0	0	1	0	0	0	D_0__Bacteria	D_1__Bacteroidetes	D_2__Sphingobacteriia	D_3__Sphingobacteriales	D_4__Chitinophagaceae	D_5__uncultured	D_6__uncultured bacterium
denovo11684	3	0	0	0	6	0	0	0	1	0	0	0	1	0	0	0	0	0	0	0	D_0__Bacteria	D_1__Proteobacteria	D_2__Epsilonproteobacteria	D_3__Campylobacterales	D_4__Helicobacteraceae	D_5__Sulfurimonas	D_6__uncultured bacterium
denovo1171	3	0	0	0	2	0	0	0	1	0	0	0	0	0	0	0	6	0	0	0	D_0__Bacteria	D_1__Proteobacteria	D_2__Betaproteobacteria	D_3__Rhodocyclales	D_4__Rhodocyclaceae	D_5__Sulfuritalea
denovo11781	3	0	0	0	0	0	0	0	2	0	0	0	1	0	0	0	2	0	0	0	D_0__Bacteria	D_1__Proteobacteria	D_2__Gammaproteobacteria	D_3__Pseudomonadales	D_4__Pseudomonadaceae	D_5__Pseudomonas	D_6__uncultured bacterium
denovo11821	3	0	1	0	2	2	0	0	0	1	0	0	1	0	1	0	3	4	1	0	D_0__Bacteria	D_1__Firmicutes	D_2__Clostridia	D_3__Clostridiales	D_4__Eubacteriaceae	D_5__uncultured	D_6__Lactobacillus mucosae
denovo11999	3	0	0	0	4	0	0	0	3	0	0	0	1	0	0	0	2	0	0	0	D_0__Bacteria	D_1__Actinobacteria	D_2__Actinobacteria	D_3__Micrococcales	D_4__Sanguibacteraceae	D_5__Sanguibacter
denovo12197	3	0	0	0	5	0	0	0	5	2	0	0	0	0	0	0	4	0	0	0	D_0__Bacteria	D_1__Proteobacteria	D_2__Gammaproteobacteria	D_3__Enterobacteriales	D_4__Enterobacteriaceae	D_5__Yersinia
denovo12439	3	0	0	0	5	0	0	0	6	0	0	0	6	0	0	0	2	0	0	0	D_0__Bacteria	D_1__Proteobacteria	D_2__Alphaproteobacteria	D_3__DB1-14	D_4__uncultured bacterium	D_5__uncultured bacterium
denovo12713	3	1	0	0	2	1	0	0	1	0	0	0	2	0	0	0	0	0	0	0	D_0__Bacteria	D_1__Chlamydiae	D_2__Chlamydiae	D_3__Chlamydiales	D_4__Parachlamydiaceae		D_6__uncultured rumen bacterium
denovo13132	3	0	0	0	0	0	0	0	2	0	0	0	0	0	0	0	0	0	0	0	D_0__Bacteria	D_1__Bacteroidetes	D_2__Bacteroidia	D_3__Bacteroidales	D_4__Bacteroidales S24-7 group	D_5__uncultured bacterium	D_6__uncultured bacterium
denovo1333	3	1	0	0	12	0	0	0	16	5	1	0	26	1	0	0	20	1	0	0	D_0__Bacteria	D_1__Firmicutes	D_2__Erysipelotrichia	D_3__Erysipelotrichales	D_4__Erysipelotrichaceae	D_5__Asteroleplasma
denovo13842	3	0	0	0	1	0	0	0	1	0	0	0	4	0	0	0	0	0	0	0	D_0__Bacteria	D_1__Firmicutes	D_2__Negativicutes	D_3__Selenomonadales	D_4__Veillonellaceae	D_5__uncultured bacterium
denovo14130	3	0	0	0	0	0	1	0	0	0	0	0	2	0	0	0	1	0	0	0	D_0__Bacteria	D_1__Proteobacteria	D_2__Alphaproteobacteria	D_3__Rhizobiales	D_4__A0839
denovo1427	3	0	0	0	0	0	0	0	0	0	0	0	1	0	0	0	0	0	0	0	D_0__Bacteria	D_1__Proteobacteria	D_2__Gammaproteobacteria	D_3__Legionellales	D_4__Legionellaceae	D_5__Legionella
denovo14286	3	0	0	0	4	0	0	0	0	0	0	0	1	0	0	0	0	0	0	0	D_0__Bacteria	D_1__Firmicutes	D_2__Clostridia	D_3__Clostridiales	D_4__Gracilibacteraceae	D_5__uncultured
denovo14340	3	8	0	0	4	24	0	23	3	4	0	0	2	43	27	430	2	0	0	0	D_0__Bacteria	D_1__Firmicutes	D_2__Negativicutes	D_3__Selenomonadales	D_4__Veillonellaceae	D_5__Selenomonas 1
denovo14797	3	0	0	0	2	0	0	0	0	0	0	0	0	0	0	0	1	0	0	0	D_0__Bacteria	D_1__Proteobacteria	D_2__Betaproteobacteria	D_3__Burkholderiales	D_4__Comamonadaceae	D_5__Leptothrix	D_6__uncultured bacterium
denovo14801	3	2	1	0	3	1	1	1	4	0	0	0	2	0	0	0	3	0	0	1	D_0__Bacteria	D_1__Proteobacteria	D_2__Alphaproteobacteria	D_3__Rhodobacterales	D_4__Rhodobacteraceae	D_5__Tabrizicola	D_6__uncultured bacterium
denovo152	3	0	0	0	2	0	0	0	1	2	1	0	1	0	0	0	3	0	0	0	Unassigned						D_6__uncultured bacterium
denovo15224	3	3	0	0	6	0	0	0	2	0	0	0	3	0	0	0	2	0	0	0	D_0__Bacteria	D_1__Bacteroidetes	D_2__Sphingobacteriia	D_3__Sphingobacteriales	D_4__Chitinophagaceae	D_5__Filimonas
denovo15378	3	0	0	0	2	1	0	0	1	0	0	0	2	0	0	0	0	0	0	0	D_0__Bacteria	D_1__Proteobacteria	D_2__Gammaproteobacteria	D_3__Xanthomonadales	D_4__Xanthomonadaceae	D_5__Stenotrophomonas
denovo15487	3	0	0	0	4	0	0	0	1	0	0	0	4	0	0	0	6	0	0	0	D_0__Bacteria	D_1__Bacteroidetes	D_2__Flavobacteriia	D_3__Flavobacteriales	D_4__Flavobacteriaceae	D_5__Flavobacterium
denovo15751	3	0	0	0	1	0	0	0	0	0	0	0	0	0	0	0	4	0	0	0	D_0__Bacteria	D_1__Bacteroidetes	D_2__Cytophagia	D_3__Cytophagales	D_4__Cytophagaceae	D_5__Runella	D_6__uncultured bacterium
denovo16081	3	0	0	0	4	0	0	0	8	0	0	0	6	0	0	0	7	0	0	0	D_0__Bacteria	D_1__Bacteroidetes	D_2__Flavobacteriia	D_3__Flavobacteriales	D_4__Flavobacteriaceae	D_5__Flavobacterium	D_6__uncultured rumen bacterium
denovo16154	3	0	0	0	3	0	0	0	1	0	0	0	3	0	0	0	2	48	0	0	D_0__Bacteria	D_1__Firmicutes	D_2__Clostridia	D_3__Clostridiales	D_4__Ruminococcaceae	D_5__Ruminiclostridium
denovo1625	3	0	0	0	1	0	0	0	1	0	0	0	0	0	0	0	1	0	0	0	D_0__Bacteria	D_1__Proteobacteria	D_2__Deltaproteobacteria	D_3__Myxococcales	D_4__Phaselicystidaceae	D_5__Phaselicystis	D_6__uncultured bacterium
denovo16326	3	0	0	0	0	0	0	0	1	0	0	0	1	0	0	0	2	2	0	0	D_0__Bacteria	D_1__Bacteroidetes	D_2__Bacteroidia	D_3__Bacteroidales			D_6__uncultured bacterium
denovo16352	3	0	0	0	3	1	0	0	0	0	0	0	1	0	0	0	0	0	0	0	D_0__Bacteria	D_1__Firmicutes	D_2__Negativicutes	D_3__Selenomonadales	D_4__Veillonellaceae	D_5__Veillonella
denovo16772	3	0	0	0	2	0	0	0	1	0	0	0	1	0	0	0	3	0	0	0	D_0__Bacteria	D_1__Proteobacteria	D_2__Gammaproteobacteria	D_3__Pseudomonadales	D_4__Pseudomonadaceae	D_5__Pseudomonas	D_6__uncultured bacterium
denovo16846	3	0	0	0	1	0	0	0	0	0	0	0	1	0	0	0	0	0	0	0	D_0__Bacteria	D_1__Bacteroidetes	D_2__Bacteroidia	D_3__Bacteroidales	D_4__Porphyromonadaceae	D_5__Odoribacter	D_6__uncultured bacterium
denovo16948	3	0	0	0	0	0	0	0	0	0	0	0	3	0	0	0	2	0	0	0	D_0__Bacteria	D_1__Bacteroidetes	D_2__Sphingobacteriia	D_3__Sphingobacteriales	D_4__Saprospiraceae	D_5__uncultured
denovo16959	3	3	1	1	0	0	0	0	0	0	1	0	0	0	0	0	0	0	0	0	D_0__Bacteria	D_1__Proteobacteria	D_2__Gammaproteobacteria	D_3__Cellvibrionales	D_4__Spongiibacteraceae	D_5__BD1-7 clade	D_6__uncultured bacterium
denovo17399	3	0	0	0	5	0	0	0	0	0	0	0	2	0	0	0	5	0	0	0	D_0__Bacteria	D_1__Synergistetes	D_2__Synergistia	D_3__Synergistales	D_4__Synergistaceae		D_6__uncultured bacterium
denovo17421	3	0	0	0	2	0	0	0	0	0	0	0	1	0	0	0	2	0	0	0	D_0__Bacteria	D_1__Firmicutes	D_2__Negativicutes	D_3__Selenomonadales	D_4__Acidaminococcaceae	D_5__uncultured	D_6__uncultured bacterium
denovo17564	3	0	0	0	1	0	0	0	0	0	0	0	0	0	0	0	0	0	0	0	D_0__Bacteria	D_1__Proteobacteria	D_2__Gammaproteobacteria	D_3__Methylococcales	D_4__Methylococcaceae	D_5__Methylomonas
denovo17602	3	0	0	0	1	1	0	0	1	2	0	0	4	0	0	0	3	0	0	0	D_0__Bacteria	D_1__Actinobacteria	D_2__Thermoleophilia	D_3__Solirubrobacterales	D_4__480-2	D_5__uncultured bacterium	D_6__uncultured bacterium
denovo17727	3	0	0	0	2	0	0	0	1	0	0	0	0	0	0	0	0	0	0	0	D_0__Bacteria	D_1__Proteobacteria	D_2__Gammaproteobacteria	D_3__Xanthomonadales	D_4__Xanthomonadaceae	D_5__Ignatzschineria
denovo17829	3	0	0	0	0	0	0	0	0	0	0	0	1	0	0	0	0	0	0	0	D_0__Bacteria	D_1__Planctomycetes	D_2__Phycisphaerae	D_3__Phycisphaerales	D_4__Phycisphaeraceae	D_5__SM1A02	D_6__uncultured bacterium
denovo17846	3	0	0	0	0	0	0	0	0	0	0	0	1	0	0	0	1	0	0	0	D_0__Bacteria	D_1__Proteobacteria	D_2__Betaproteobacteria	D_3__Hot Creek 32	D_4__uncultured bacterium	D_5__uncultured bacterium	D_6__uncultured bacterium
denovo17959	3	0	0	0	0	0	0	0	0	0	0	0	1	0	0	0	1	1	0	0	D_0__Bacteria	D_1__Firmicutes	D_2__Clostridia	D_3__Clostridiales	D_4__Ruminococcaceae	D_5__Ruminiclostridium 5
denovo18109	3	0	0	0	1	0	0	0	1	0	0	0	0	0	0	0	0	0	0	0	D_0__Bacteria	D_1__Bacteroidetes	D_2__Bacteroidia	D_3__Bacteroidales	D_4__Bacteroidales UCG-001	D_5__uncultured bacterium
denovo18583	3	1	0	0	0	0	0	0	1	5	4	0	1	2	2	0	1	1	0	0	D_0__Bacteria	D_1__Firmicutes	D_2__Erysipelotrichia	D_3__Erysipelotrichales	D_4__Erysipelotrichaceae	D_5__Erysipelotrichaceae UCG-004	D_6__uncultured bacterium
denovo18752	3	0	0	0	0	0	0	0	0	0	0	0	1	0	0	0	0	0	0	0	D_0__Bacteria	D_1__Bacteroidetes	D_2__Flavobacteriia	D_3__Flavobacteriales	D_4__Flavobacteriaceae	D_5__Cloacibacterium	D_6__uncultured bacterium
denovo188	3	0	0	0	1	0	0	0	1	0	0	0	0	0	0	0	2	0	0	0	D_0__Bacteria	D_1__Proteobacteria	D_2__Deltaproteobacteria	D_3__Myxococcales	D_4__Phaselicystidaceae	D_5__Phaselicystis	D_6__uncultured bacterium
denovo19051	3	0	0	0	4	0	0	0	3	0	1	0	2	0	0	0	2	0	0	0	D_0__Bacteria	D_1__Armatimonadetes	D_2__Armatimonadia	D_3__Armatimonadales	D_4__Armatimonadaceae	D_5__Armatimonas	D_6__uncultured bacterium
denovo19293	3	1	0	0	3	1	0	0	1	0	0	0	1	0	0	0	3	1	0	0	D_0__Bacteria	D_1__Verrucomicrobia	D_2__OPB35 soil group
denovo19303	3	0	0	0	6	1	0	0	2	0	0	0	5	0	0	0	4	0	0	0	D_0__Bacteria	D_1__Saccharibacteria	D_2__uncultured bacterium	D_3__uncultured bacterium	D_4__uncultured bacterium	D_5__uncultured bacterium	D_6__Proteus mirabilis
denovo19375	3	0	0	0	8	2	0	0	3	0	0	0	0	0	0	0	3	0	0	0	D_0__Bacteria	D_1__Saccharibacteria	D_2__uncultured bacterium	D_3__uncultured bacterium	D_4__uncultured bacterium	D_5__uncultured bacterium	D_6__uncultured bacterium
denovo19423	3	0	0	0	2	0	0	0	2	2	1	0	1	0	0	0	0	0	0	0	D_0__Bacteria	D_1__Firmicutes	D_2__Erysipelotrichia	D_3__Erysipelotrichales	D_4__Erysipelotrichaceae	D_5__Erysipelotrichaceae UCG-004	D_6__uncultured bacterium
denovo19481	3	2	2	0	4	0	0	0	3	0	0	0	0	1	0	5	8	1415	1169	1055	D_0__Bacteria	D_1__Bacteroidetes	D_2__Bacteroidia	D_3__Bacteroidales	D_4__Bacteroidaceae	D_5__Bacteroides
denovo19560	3	0	0	0	2	0	0	0	4	0	0	0	1	0	0	0	0	0	0	0	D_0__Bacteria	D_1__Bacteroidetes	D_2__Flavobacteriia	D_3__Flavobacteriales	D_4__Flavobacteriaceae	D_5__Flavobacterium
denovo19640	3	1	0	0	3	0	0	0	4	0	0	0	6	0	0	0	2	0	0	0	D_0__Bacteria	D_1__Proteobacteria	D_2__Alphaproteobacteria	D_3__Rickettsiales	D_4__Rickettsiaceae	D_5__uncultured	D_6__uncultured bacterium
denovo19747	3	0	0	0	2	0	0	0	1	0	0	0	5	0	0	0	2	0	0	0	D_0__Bacteria	D_1__Firmicutes	D_2__Negativicutes	D_3__Selenomonadales	D_4__Veillonellaceae	D_5__Propionispira
denovo19774	3	0	1	0	3	0	0	0	7	0	0	0	2	0	0	0	2	0	0	0	D_0__Bacteria	D_1__Bacteroidetes	D_2__Sphingobacteriia	D_3__Sphingobacteriales	D_4__env.OPS 17	D_5__uncultured Bacteroidetes bacterium
denovo20004	3	0	0	0	1	0	0	0	2	0	0	0	2	0	0	0	1	0	0	0	D_0__Bacteria	D_1__Bacteroidetes	D_2__Sphingobacteriia	D_3__Sphingobacteriales	D_4__env.OPS 17	D_5__uncultured bacterium
denovo20054	3	0	0	0	2	0	0	0	2	0	0	0	1	0	0	0	0	0	0	0	D_0__Bacteria	D_1__Proteobacteria	D_2__Alphaproteobacteria	D_3__Rhodospirillales	D_4__Rhodospirillaceae	D_5__Ferrovibrio	D_6__uncultured bacterium
denovo20084	3	0	0	0	3	0	0	0	7	0	0	0	3	0	0	0	4	0	0	0	D_0__Bacteria	D_1__Proteobacteria	D_2__Deltaproteobacteria	D_3__Oligoflexales	D_4__uncultured bacterium	D_5__uncultured bacterium
denovo20353	3	0	0	0	4	0	0	0	2	0	0	0	4	0	0	0	4	0	0	0	D_0__Bacteria	D_1__Bacteroidetes	D_2__Flavobacteriia	D_3__Flavobacteriales	D_4__Flavobacteriaceae	D_5__Flavobacterium	D_6__uncultured bacterium
denovo20419	3	0	0	0	0	0	0	0	1	0	0	0	3	0	0	0	1	0	0	0	D_0__Bacteria	D_1__Proteobacteria	D_2__Gammaproteobacteria	D_3__Oceanospirillales	D_4__Halomonadaceae	D_5__Halomonas
denovo20955	3	0	0	0	0	0	0	0	0	0	0	0	2	0	0	0	3	0	0	0	D_0__Bacteria	D_1__Proteobacteria	D_2__Gammaproteobacteria	D_3__Enterobacteriales	D_4__Enterobacteriaceae	D_5__Ewingella	D_6__uncultured rumen bacterium
denovo21214	3	0	0	0	14	1	0	0	2	0	0	0	3	0	0	0	6	0	0	0	D_0__Bacteria	D_1__Bacteroidetes	D_2__Bacteroidia	D_3__Bacteroidales	D_4__Porphyromonadaceae	D_5__Dysgonomonas	D_6__uncultured bacterium
denovo21288	3	0	0	0	3	0	0	0	1	0	0	0	0	0	0	0	2	0	0	0	D_0__Bacteria	D_1__Firmicutes	D_2__Clostridia	D_3__Clostridiales	D_4__Ruminococcaceae	D_5__uncultured	D_6__uncultured bacterium
denovo21394	3	0	0	0	10	0	0	0	7	0	0	0	11	0	0	0	6	0	0	0	D_0__Bacteria	D_1__Bacteroidetes	D_2__Sphingobacteriia	D_3__Sphingobacteriales	D_4__PHOS-HE51	D_5__uncultured bacterium
denovo21539	3	108	1	0	8	29	3	0	3	23	8	0	5	29	1	2	5	2	0	0	D_0__Bacteria	D_1__Bacteroidetes	D_2__Bacteroidia	D_3__Bacteroidales	D_4__Prevotellaceae	D_5__Prevotella 7	D_6__uncultured bacterium
denovo21553	3	0	0	0	1	0	0	0	6	0	0	0	2	0	0	0	2	0	0	0	D_0__Bacteria	D_1__Proteobacteria	D_2__Betaproteobacteria	D_3__Rhodocyclales	D_4__Rhodocyclaceae	D_5__Propionivibrio
denovo21614	3	0	1	0	2	0	0	0	2	0	0	0	2	0	0	0	4	0	0	0	D_0__Bacteria	D_1__Bacteroidetes	D_2__Sphingobacteriia	D_3__Sphingobacteriales	D_4__env.OPS 17	D_5__uncultured bacterium
denovo21774	3	0	0	0	2	0	0	0	0	0	0	0	0	0	0	0	1	0	0	0	D_0__Bacteria	D_1__Proteobacteria	D_2__Deltaproteobacteria	D_3__Oligoflexales	D_4__Oligoflexaceae	D_5__uncultured bacterium	D_6__uncultured bacterium
denovo21806	3	0	0	0	4	0	0	0	4	0	0	0	1	0	0	0	3	0	0	0	D_0__Bacteria	D_1__Proteobacteria	D_2__Deltaproteobacteria	D_3__Myxococcales	D_4__Nannocystaceae	D_5__Nannocystis
denovo21974	3	2	0	0	1	0	0	0	1	0	0	0	0	0	0	0	4	0	0	0	D_0__Bacteria	D_1__Bacteroidetes	D_2__Bacteroidia	D_3__Bacteroidales	D_4__Bacteroidales S24-7 group	D_5__uncultured bacterium	D_6__uncultured bacterium
denovo246	3	0	0	0	3	0	0	0	1	0	0	0	0	0	0	0	6	0	0	0	D_0__Bacteria	D_1__Bacteroidetes	D_2__Cytophagia	D_3__Cytophagales	D_4__Cytophagaceae	D_5__Dyadobacter	D_6__uncultured bacterium
denovo2603	3	0	0	0	0	0	0	0	0	0	0	0	0	0	0	0	0	0	0	0	D_0__Bacteria	D_1__Proteobacteria	D_2__Alphaproteobacteria	D_3__DB1-14	D_4__uncultured bacterium	D_5__uncultured bacterium	D_6__uncultured bacterium
denovo2676	3	0	0	0	0	0	0	0	0	0	0	0	4	0	0	0	0	0	0	0	D_0__Bacteria	D_1__Bacteroidetes	D_2__Sphingobacteriia	D_3__Sphingobacteriales	D_4__Sphingobacteriaceae	D_5__Sphingobacterium
denovo2716	3	0	0	0	1	0	0	0	0	0	0	0	0	0	0	0	2	0	0	0	D_0__Bacteria	D_1__Firmicutes	D_2__Erysipelotrichia	D_3__Erysipelotrichales	D_4__Erysipelotrichaceae	D_5__Erysipelotrichaceae UCG-004	D_6__Proteus mirabilis
denovo2769	3	2	0	0	2	0	0	0	3	0	0	0	3	0	0	0	4	0	0	0	D_0__Bacteria	D_1__Bacteroidetes	D_2__Flavobacteriia	D_3__Flavobacteriales	D_4__Flavobacteriaceae	D_5__Chryseobacterium	D_6__uncultured bacterium
denovo2816	3	0	0	0	3	0	0	0	3	2	0	0	5	0	0	0	1	0	0	0	D_0__Bacteria	D_1__Firmicutes	D_2__Erysipelotrichia	D_3__Erysipelotrichales	D_4__Erysipelotrichaceae	D_5__Catenibacterium
denovo2852	3	0	0	0	2	0	0	0	2	0	0	0	0	0	0	0	0	0	0	0	D_0__Bacteria	D_1__Actinobacteria	D_2__Actinobacteria	D_3__Micrococcales	D_4__Intrasporangiaceae	D_5__Janibacter	D_6__uncultured bacterium
denovo3204	3	1	0	0	1	0	0	0	2	0	0	0	3	0	0	0	5	0	0	0	D_0__Bacteria	D_1__Acidobacteria	D_2__Acidobacteria	D_3__Subgroup 6	D_4__uncultured Acidobacteria bacterium	D_5__uncultured Acidobacteria bacterium
denovo3289	3	0	0	0	0	0	0	0	4	0	0	0	0	0	0	0	0	0	0	0	D_0__Bacteria	D_1__Firmicutes	D_2__Negativicutes	D_3__Selenomonadales	D_4__Veillonellaceae	D_5__uncultured	D_6__uncultured organism
denovo3378	3	1	0	0	1	2	0	0	1	3	2	0	2	0	0	0	4	3	0	0	D_0__Bacteria	D_1__Firmicutes	D_2__Clostridia	D_3__Clostridiales	D_4__Peptococcaceae	D_5__uncultured
denovo362	3	0	0	0	2	0	0	0	0	0	0	0	0	0	0	0	0	0	0	0	D_0__Bacteria	D_1__Firmicutes	D_2__Clostridia	D_3__Clostridiales	D_4__Ruminococcaceae	D_5__Ruminococcus 2
denovo3721	3	8	5	0	1	2	0	0	2	0	0	0	0	1	0	0	1	1	1	0	D_0__Bacteria	D_1__Candidate division WS6	D_2__uncultured bacterium	D_3__uncultured bacterium	D_4__uncultured bacterium	D_5__uncultured bacterium
denovo3777	3	0	0	0	0	0	0	0	4	0	0	0	3	0	0	0	3	0	0	0	Unassigned						D_6__uncultured bacterium
denovo4004	3	5	10	2	10	1	1	3	7	1	2	0	2	2	8	25	16	1010	5016	6768	D_0__Bacteria	D_1__Bacteroidetes	D_2__Bacteroidia	D_3__Bacteroidales	D_4__Bacteroidaceae	D_5__Bacteroides	D_6__uncultured bacterium
denovo4261	3	0	0	0	3	0	0	0	17	1	0	0	2	0	0	0	12	0	0	0	D_0__Bacteria	D_1__Proteobacteria	D_2__Deltaproteobacteria	D_3__Bdellovibrionales	D_4__Bacteriovoracaceae	D_5__Peredibacter
denovo4340	3	1	0	0	3	0	0	0	2	0	0	0	5	0	0	0	3	0	0	0	D_0__Bacteria	D_1__Proteobacteria	D_2__Alphaproteobacteria	D_3__DB1-14	D_4__uncultured bacterium	D_5__uncultured bacterium	D_6__uncultured bacterium
denovo4493	3	0	0	0	0	0	0	0	1	0	0	0	2	0	0	0	0	0	0	0	D_0__Bacteria	D_1__Bacteroidetes	D_2__Bacteroidia	D_3__Bacteroidales	D_4__Porphyromonadaceae	D_5__uncultured
denovo4720	3	0	0	0	4	0	0	0	4	0	0	0	5	0	0	0	2	0	0	0	D_0__Bacteria	D_1__Proteobacteria	D_2__Alphaproteobacteria	D_3__Rhodospirillales	D_4__Rhodospirillaceae	D_5__uncultured
denovo4801	3	0	0	0	1	0	0	0	1	0	0	0	5	0	0	0	0	0	0	0	D_0__Bacteria	D_1__Firmicutes	D_2__Clostridia	D_3__Clostridiales	D_4__Lachnospiraceae	D_5__uncultured
denovo5196	3	2	0	0	0	0	0	0	1	0	0	0	0	0	0	0	0	0	0	0	D_0__Bacteria	D_1__Proteobacteria	D_2__Deltaproteobacteria	D_3__Desulfobacterales	D_4__Desulfobacteraceae	D_5__Desulfobacter	D_6__uncultured bacterium
denovo5324	3	0	0	0	0	0	0	0	1	0	0	0	1	0	0	0	1	0	0	0	D_0__Bacteria	D_1__Proteobacteria	D_2__Betaproteobacteria	D_3__Neisseriales	D_4__Neisseriaceae	D_5__Formivibrio	D_6__uncultured bacterium
denovo5343	3	0	0	0	1	0	0	0	5	0	0	0	0	0	0	0	5	0	0	0	D_0__Bacteria	D_1__Proteobacteria	D_2__Betaproteobacteria	D_3__Rhodocyclales	D_4__Rhodocyclaceae	D_5__Sulfuritalea	D_6__uncultured bacterium
denovo5679	3	0	0	0	3	0	0	0	4	0	0	0	8	0	0	0	4	0	0	0	D_0__Bacteria	D_1__Proteobacteria	D_2__Gammaproteobacteria	D_3__Enterobacteriales	D_4__Enterobacteriaceae	D_5__Raoultella	D_6__uncultured bacterium
denovo6412	3	1	0	0	0	0	1	0	0	0	0	0	0	0	0	0	1	0	0	0	D_0__Bacteria	D_1__Firmicutes	D_2__Clostridia	D_3__Clostridiales	D_4__Clostridiaceae 1	D_5__Clostridium sensu stricto 1	D_6__uncultured bacterium
denovo6654	3	0	0	0	2	0	0	0	0	0	0	0	3	0	0	0	0	0	0	0	D_0__Bacteria	D_1__Proteobacteria	D_2__Betaproteobacteria	D_3__Burkholderiales
denovo7374	3	1	1	0	2	1	0	0	2	1	1	0	1	1	0	0	3	43	66	54	D_0__Bacteria	D_1__Firmicutes	D_2__Clostridia	D_3__Clostridiales	D_4__Eubacteriaceae		D_6__uncultured bacterium
denovo7530	3	1	0	0	3	0	0	0	0	0	1	0	3	0	0	0	2	0	0	0	D_0__Bacteria	D_1__Proteobacteria	D_2__Gammaproteobacteria	D_3__Xanthomonadales	D_4__Xanthomonadaceae	D_5__uncultured	D_6__uncultured bacterium
denovo7598	3	0	0	0	0	0	0	0	1	0	0	0	1	0	0	0	0	0	0	0	D_0__Bacteria	D_1__Firmicutes	D_2__Clostridia	D_3__Clostridiales	D_4__Lachnospiraceae	D_5__Syntrophococcus	D_6__uncultured bacterium
denovo7815	3	0	0	0	4	0	0	0	6	0	0	0	7	0	0	0	15	0	0	0	D_0__Bacteria	D_1__Proteobacteria	D_2__Betaproteobacteria	D_3__Burkholderiales	D_4__Comamonadaceae	D_5__Leptothrix
denovo7859	3	0	0	0	2	0	0	0	0	0	0	0	2	0	0	0	3	0	0	0	D_0__Bacteria	D_1__Bacteroidetes	D_2__Sphingobacteriia	D_3__Sphingobacteriales	D_4__Chitinophagaceae	D_5__Filimonas	D_6__uncultured bacterium
denovo792	3	1	0	0	2	0	0	0	5	0	1	0	1	0	0	0	1	0	0	0	D_0__Bacteria	D_1__Bacteroidetes	D_2__Bacteroidia	D_3__Bacteroidales	D_4__Bacteroidaceae	D_5__Bacteroides
denovo7940	3	0	0	0	8	0	0	0	2	1	1	0	7	0	0	0	2	0	0	0	D_0__Bacteria	D_1__Chlamydiae	D_2__Chlamydiae	D_3__Chlamydiales	D_4__Parachlamydiaceae	D_5__Candidatus Protochlamydia
denovo796	3	0	0	0	0	0	0	0	1	0	0	0	0	0	0	0	0	0	0	0	D_0__Bacteria	D_1__Proteobacteria	D_2__Betaproteobacteria	D_3__Burkholderiales	D_4__Oxalobacteraceae	D_5__Massilia	D_6__uncultured bacterium
denovo807	3	0	0	0	3	0	0	0	1	0	0	0	2	0	0	0	0	0	0	0	D_0__Bacteria	D_1__Firmicutes	D_2__Clostridia	D_3__Clostridiales	D_4__Ruminococcaceae	D_5__Ruminococcaceae UCG-002
denovo8158	3	0	0	0	1	1	0	0	0	0	0	0	1	0	0	0	1	0	0	0	D_0__Bacteria	D_1__Acidobacteria	D_2__Holophagae	D_3__Subgroup 7	D_4__uncultured bacterium	D_5__uncultured bacterium	D_6__uncultured bacterium
denovo8321	3	2	0	0	3	0	0	0	2	0	0	0	5	0	0	0	1	0	0	0	D_0__Bacteria	D_1__Proteobacteria	D_2__Gammaproteobacteria	D_3__Pseudomonadales	D_4__Moraxellaceae	D_5__Acinetobacter	D_6__uncultured bacterium
denovo847	3	0	0	0	3	0	0	0	4	0	0	0	3	0	0	0	6	0	0	0	D_0__Bacteria	D_1__Proteobacteria	D_2__Gammaproteobacteria	D_3__Enterobacteriales	D_4__Enterobacteriaceae	D_5__Rahnella	D_6__uncultured bacterium
denovo849	3	0	0	0	3	0	0	0	3	0	0	0	0	0	0	0	0	0	0	0	D_0__Bacteria	D_1__Bacteroidetes	D_2__Bacteroidia	D_3__Bacteroidia Incertae Sedis	D_4__Prolixibacteraceae	D_5__Prolixibacter	D_6__uncultured bacterium
denovo8535	3	0	0	0	1	0	0	0	3	0	0	0	2	0	0	0	3	0	0	0	D_0__Bacteria	D_1__Proteobacteria	D_2__Betaproteobacteria	D_3__Neisseriales	D_4__Neisseriaceae		D_6__uncultured bacterium
denovo8639	3	1	0	0	1	0	0	0	3	0	0	0	1	0	0	0	2	2	0	1	D_0__Bacteria	D_1__Bacteroidetes	D_2__Bacteroidia	D_3__Bacteroidales	D_4__Bacteroidaceae	D_5__Bacteroides
denovo8791	3	1	0	0	0	5	0	0	2	23	0	0	0	6	0	0	2	0	0	0	D_0__Bacteria	D_1__Bacteroidetes	D_2__Bacteroidia	D_3__Bacteroidales	D_4__Prevotellaceae	D_5__Prevotella 1
denovo8803	3	57	2	0	3	14	1	0	2	14	2	0	2	12	1	0	9	0	0	0	D_0__Bacteria	D_1__Bacteroidetes	D_2__Bacteroidia	D_3__Bacteroidales	D_4__Prevotellaceae	D_5__Prevotella 7
denovo8907	3	0	0	0	4	0	0	0	5	0	0	0	5	0	0	0	4	0	0	0	D_0__Bacteria	D_1__Bacteroidetes	D_2__Sphingobacteriia	D_3__Sphingobacteriales	D_4__Saprospiraceae	D_5__uncultured	D_6__uncultured bacterium
denovo8932	3	1	0	0	3	0	0	0	2	0	0	0	2	0	0	0	2	0	0	0	D_0__Bacteria	D_1__Firmicutes	D_2__Clostridia	D_3__Clostridiales	D_4__Ruminococcaceae	D_5__uncultured	D_6__uncultured bacterium
denovo8956	3	2	0	0	3	0	0	0	6	0	0	0	10	0	0	0	2	1	0	0	D_0__Bacteria	D_1__Proteobacteria	D_2__Betaproteobacteria	D_3__Rhodocyclales	D_4__Rhodocyclaceae	D_5__Candidatus Accumulibacter	D_6__uncultured bacterium
denovo8994	3	2	0	0	4	2	0	0	1	0	0	0	1	0	0	0	5	0	0	0	D_0__Bacteria	D_1__Acidobacteria	D_2__Acidobacteria	D_3__Subgroup 4	D_4__Unknown Family	D_5__Blastocatella
denovo9447	3	0	0	0	1	0	0	0	1	0	0	0	0	0	0	0	1	0	0	0	D_0__Bacteria	D_1__Proteobacteria	D_2__Epsilonproteobacteria	D_3__Campylobacterales	D_4__Campylobacteraceae	D_5__Sulfurospirillum	D_6__uncultured rumen bacterium
denovo9536	3	1	4	0	6	0	0	1	1	0	2	0	1	3	5	4	2	271	2448	433	D_0__Bacteria	D_1__Bacteroidetes	D_2__Bacteroidia	D_3__Bacteroidales	D_4__Bacteroidaceae	D_5__Bacteroides	D_6__uncultured bacterium
denovo9611	3	0	0	0	0	0	0	0	1	0	0	0	0	0	0	0	2	0	0	0	D_0__Bacteria	D_1__Proteobacteria	D_2__Betaproteobacteria	D_3__Burkholderiales	D_4__Comamonadaceae
denovo9691	3	0	0	0	3	0	0	0	7	0	0	0	2	0	0	0	6	0	0	0	D_0__Bacteria	D_1__Bacteroidetes	D_2__Bacteroidia	D_3__Bacteroidales	D_4__Prevotellaceae	D_5__Prevotella 1	D_6__uncultured bacterium
denovo9706	3	0	0	0	1	0	0	0	2	0	0	0	1	1	0	0	2	0	0	0	D_0__Bacteria	D_1__Proteobacteria	D_2__Betaproteobacteria	D_3__Rhodocyclales	D_4__Rhodocyclaceae	D_5__uncultured	D_6__uncultured bacterium
denovo9776	3	4	1	0	8	0	0	0	2	1	0	0	3	0	3	3	4	20	361	425	D_0__Bacteria	D_1__Bacteroidetes	D_2__Bacteroidia	D_3__Bacteroidales	D_4__Rikenellaceae	D_5__Alistipes	D_6__uncultured bacterium
denovo9809	3	0	0	0	1	0	0	0	1	0	0	0	3	0	0	0	2	0	0	0	D_0__Bacteria	D_1__Proteobacteria	D_2__Betaproteobacteria	D_3__Burkholderiales	D_4__Comamonadaceae	D_5__Ottowia
denovo10022	2	3	0	0	8	2	0	0	1	0	0	0	8	1	0	0	5	0	0	0	D_0__Bacteria	D_1__Proteobacteria	D_2__Alphaproteobacteria	D_3__Rhodospirillales	D_4__B79	D_5__uncultured bacterium
denovo10091	2	0	0	0	0	0	0	0	1	0	0	0	2	0	0	0	1	0	0	0	Unassigned
denovo1020	2	0	0	0	0	0	0	0	2	0	0	0	4	0	0	0	3	0	0	0	D_0__Bacteria	D_1__Firmicutes	D_2__Clostridia	D_3__Clostridiales	D_4__Family XIII		D_6__uncultured bacterium
denovo10240	2	0	0	0	4	0	0	0	2	0	0	0	2	0	0	0	0	0	0	0	D_0__Bacteria	D_1__Proteobacteria	D_2__Gammaproteobacteria	D_3__Xanthomonadales	D_4__Xanthomonadaceae	D_5__uncultured	D_6__uncultured bacterium
denovo10381	2	2	0	0	0	0	0	0	3	0	0	0	4	0	0	0	4	0	0	0	D_0__Bacteria	D_1__Verrucomicrobia	D_2__Opitutae	D_3__Opitutales	D_4__Opitutaceae	D_5__Opitutus	D_6__uncultured bacterium
denovo10443	2	0	0	0	0	0	0	0	0	0	0	0	0	0	0	0	0	0	0	0	D_0__Bacteria	D_1__Proteobacteria	D_2__Gammaproteobacteria	D_3__BD72BR169	D_4__uncultured bacterium	D_5__uncultured bacterium
denovo10449	2	0	0	0	0	0	0	0	0	0	0	0	0	0	0	0	3	0	0	0	D_0__Bacteria	D_1__Proteobacteria	D_2__TA18	D_3__uncultured bacterium	D_4__uncultured bacterium	D_5__uncultured bacterium
denovo10571	2	0	0	0	2	0	0	0	3	0	0	0	1	0	0	0	0	0	0	0	D_0__Bacteria	D_1__Bacteroidetes	D_2__Sphingobacteriia	D_3__Sphingobacteriales	D_4__Chitinophagaceae	D_5__uncultured
denovo10578	2	2	1	0	24	3	0	0	5	0	0	0	8	1	1	0	11	1	1	0	D_0__Bacteria	D_1__Proteobacteria	D_2__Betaproteobacteria	D_3__Burkholderiales	D_4__Comamonadaceae	D_5__uncultured
denovo10823	2	0	0	0	0	0	0	0	0	0	0	0	0	0	0	0	0	0	0	0	Unassigned						D_6__uncultured bacterium
denovo10846	2	0	0	0	0	0	0	0	0	0	0	0	0	0	0	0	0	0	0	0	Unassigned
denovo10873	2	0	0	0	1	0	0	0	1	0	0	0	0	0	0	0	2	0	0	0	D_0__Bacteria	D_1__Firmicutes	D_2__Clostridia	D_3__Clostridiales	D_4__Ruminococcaceae	D_5__[Eubacterium] coprostanoligenes group	D_6__uncultured bacterium
denovo10882	2	0	0	0	2	0	0	0	1	0	0	0	1	0	0	0	2	0	0	0	D_0__Bacteria	D_1__Proteobacteria	D_2__Alphaproteobacteria	D_3__Rhodospirillales	D_4__Rhodospirillaceae	D_5__uncultured	D_6__uncultured bacterium
denovo10916	2	0	0	0	1	0	0	0	2	0	0	0	0	0	0	0	0	0	0	0	D_0__Bacteria	D_1__Proteobacteria	D_2__Alphaproteobacteria	D_3__Rhodospirillales	D_4__Rhodospirillaceae	D_5__Thalassospira	D_6__uncultured organism
denovo1092	2	0	0	0	1	0	0	0	1	0	0	0	1	0	0	0	0	0	0	0	D_0__Bacteria	D_1__Bacteroidetes	D_2__Sphingobacteriia	D_3__Sphingobacteriales	D_4__Sphingobacteriaceae	D_5__Pedobacter
denovo10994	2	0	1	0	1	0	0	0	0	0	0	0	1	0	0	0	3	0	0	0	D_0__Bacteria	D_1__Chlamydiae	D_2__Chlamydiae	D_3__Chlamydiales	D_4__Parachlamydiaceae	D_5__Candidatus Protochlamydia
denovo11039	2	0	0	0	0	1	0	0	1	1	0	0	0	0	0	0	2	0	0	0	D_0__Bacteria	D_1__Proteobacteria	D_2__Deltaproteobacteria	D_3__Bdellovibrionales	D_4__Bacteriovoracaceae	D_5__Bacteriovorax
denovo11083	2	0	0	0	0	0	0	0	0	0	0	0	0	0	0	0	0	0	0	0	D_0__Bacteria	D_1__Proteobacteria	D_2__Deltaproteobacteria	D_3__Desulfovibrionales	D_4__Desulfovibrionaceae	D_5__Desulfovibrio	D_6__uncultured bacterium
denovo11088	2	0	0	0	0	0	0	0	0	0	0	0	0	0	0	0	0	0	0	0	D_0__Bacteria	D_1__Firmicutes	D_2__Clostridia	D_3__Clostridiales	D_4__Lachnospiraceae		D_6__uncultured bacterium
denovo11153	2	0	0	0	1	0	0	0	1	0	0	0	0	0	0	0	0	0	0	0	D_0__Bacteria	D_1__Firmicutes	D_2__Bacilli	D_3__Lactobacillales			D_6__uncultured bacterium
denovo11193	2	1	1	0	0	0	0	0	1	1	0	0	0	0	0	0	3	0	0	0	D_0__Bacteria	D_1__Firmicutes	D_2__Clostridia	D_3__Clostridiales	D_4__Ruminococcaceae	D_5__Ruminococcus 1
denovo11217	2	0	0	0	1	0	0	0	2	0	0	0	4	0	0	0	2	0	0	0	D_0__Bacteria	D_1__Planctomycetes	D_2__Phycisphaerae	D_3__Phycisphaerales	D_4__Phycisphaeraceae	D_5__CL500-3
denovo11221	2	0	0	0	5	0	0	1	6	0	0	0	3	1	0	0	4	0	0	0	D_0__Bacteria	D_1__Saccharibacteria	D_2__uncultured bacterium	D_3__uncultured bacterium	D_4__uncultured bacterium	D_5__uncultured bacterium
denovo11354	2	0	0	0	1	0	0	0	2	0	0	0	0	0	0	0	0	0	0	0	D_0__Bacteria	D_1__Tenericutes	D_2__Mollicutes	D_3__Acholeplasmatales	D_4__Acholeplasmataceae	D_5__Acholeplasma	D_6__uncultured organism
denovo11394	2	0	0	0	0	0	0	0	1	0	0	0	0	0	0	0	1	0	0	0	D_0__Bacteria	D_1__Candidate division SR1	D_2__uncultured bacterium	D_3__uncultured bacterium	D_4__uncultured bacterium	D_5__uncultured bacterium	D_6__uncultured bacterium
denovo11476	2	0	0	0	11	1	0	0	0	6	1	0	3	0	0	0	2	8	3	0	D_0__Bacteria	D_1__Bacteroidetes	D_2__Bacteroidia	D_3__Bacteroidales	D_4__Prevotellaceae	D_5__uncultured	D_6__uncultured bacterium
denovo11591	2	1	0	0	0	0	0	0	0	0	0	0	0	0	0	0	2	1	0	0	D_0__Bacteria	D_1__Proteobacteria	D_2__Betaproteobacteria	D_3__Rhodocyclales	D_4__Rhodocyclaceae	D_5__Propionivibrio
denovo11645	2	0	0	0	1	0	0	0	0	0	0	0	0	0	0	0	0	0	0	0	D_0__Bacteria	D_1__Synergistetes	D_2__Synergistia	D_3__Synergistales	D_4__Synergistaceae	D_5__uncultured	D_6__uncultured bacterium
denovo11668	2	0	0	0	0	0	0	0	0	0	0	0	0	0	0	0	0	0	0	0	D_0__Bacteria	D_1__Proteobacteria	D_2__Gammaproteobacteria	D_3__NKB5	D_4__uncultured bacterium	D_5__uncultured bacterium	D_6__uncultured bacterium
denovo11827	2	0	0	0	0	0	0	0	0	0	0	0	1	0	0	0	0	0	0	0	D_0__Bacteria	D_1__Saccharibacteria	D_2__uncultured bacterium	D_3__uncultured bacterium	D_4__uncultured bacterium	D_5__uncultured bacterium
denovo11829	2	0	0	0	0	0	0	0	2	0	0	0	0	0	0	0	1	0	0	0	D_0__Bacteria	D_1__Firmicutes	D_2__Clostridia	D_3__Clostridiales	D_4__Family XI	D_5__Sedimentibacter	D_6__uncultured bacterium
denovo11847	2	0	0	0	1	0	0	0	0	0	0	0	0	0	0	0	0	0	0	0	Unassigned						D_6__uncultured bacterium
denovo11899	2	0	0	0	1	0	0	0	3	0	0	0	3	0	0	0	2	0	0	0	D_0__Bacteria	D_1__Proteobacteria	D_2__Betaproteobacteria	D_3__Rhodocyclales	D_4__Rhodocyclaceae	D_5__Candidatus Accumulibacter
denovo11926	2	0	0	0	0	0	0	0	0	0	0	0	0	0	0	0	0	0	0	0	D_0__Bacteria	D_1__Firmicutes	D_2__Erysipelotrichia	D_3__Erysipelotrichales	D_4__Erysipelotrichaceae	D_5__Erysipelotrichaceae UCG-004	D_6__uncultured bacterium
denovo11938	2	0	0	0	2	0	0	0	1	0	0	0	2	0	0	0	0	0	0	0	D_0__Bacteria	D_1__Firmicutes	D_2__Clostridia	D_3__Clostridiales	D_4__Peptostreptococcaceae	D_5__Peptoclostridium
denovo11946	2	0	0	0	0	0	0	0	1	0	0	0	0	0	0	0	0	0	0	0	D_0__Bacteria	D_1__Acidobacteria	D_2__Acidobacteria	D_3__Subgroup 6	D_4__uncultured Acidobacteria bacterium	D_5__uncultured Acidobacteria bacterium
denovo11980	2	0	0	0	5	0	0	0	5	0	0	0	5	0	0	0	0	0	0	0	D_0__Bacteria	D_1__Proteobacteria	D_2__Epsilonproteobacteria	D_3__Campylobacterales	D_4__Helicobacteraceae	D_5__Sulfurovum
denovo1207	2	0	0	0	1	0	0	0	0	0	0	0	0	0	0	0	1	0	0	0	D_0__Bacteria	D_1__Proteobacteria	D_2__Gammaproteobacteria	D_3__Enterobacteriales	D_4__Enterobacteriaceae	D_5__Raoultella	D_6__uncultured bacterium
denovo12176	2	1	0	0	3	0	0	0	0	0	0	0	2	0	0	0	2	0	0	0	D_0__Bacteria	D_1__Proteobacteria	D_2__Deltaproteobacteria	D_3__Desulfovibrionales	D_4__Desulfovibrionaceae	D_5__Desulfovibrio	D_6__uncultured bacterium
denovo12268	2	0	0	0	0	0	0	0	1	1	0	0	1	0	0	0	0	0	0	0	D_0__Bacteria	D_1__Firmicutes	D_2__Negativicutes	D_3__Selenomonadales	D_4__Acidaminococcaceae	D_5__Succiniclasticum	D_6__uncultured bacterium
denovo12319	2	5	0	0	5	3	0	0	7	1	0	0	3	0	0	0	5	0	0	0	D_0__Bacteria	D_1__Actinobacteria	D_2__Actinobacteria	D_3__Corynebacteriales	D_4__Mycobacteriaceae	D_5__Mycobacterium
denovo12331	2	1	0	0	4	1	1	0	0	0	0	0	0	0	0	0	1	0	0	0	D_0__Bacteria	D_1__Firmicutes	D_2__Clostridia	D_3__Clostridiales	D_4__Clostridiaceae 1	D_5__Clostridium sensu stricto 1	D_6__uncultured bacterium
denovo12416	2	0	0	0	3	1	0	0	4	0	0	0	5	0	0	0	3	0	0	0	D_0__Bacteria	D_1__Proteobacteria	D_2__Alphaproteobacteria	D_3__DB1-14	D_4__uncultured bacterium	D_5__uncultured bacterium	D_6__uncultured bacterium
denovo12428	2	0	0	0	0	1	0	0	0	0	0	0	0	0	0	0	0	0	0	0	D_0__Bacteria	D_1__Actinobacteria	D_2__Actinobacteria	D_3__Propionibacteriales	D_4__Nocardioidaceae	D_5__Nocardioides
denovo12491	2	1	0	0	3	5	0	0	2	0	1	0	3	2	0	0	2	0	0	0	D_0__Bacteria	D_1__Proteobacteria	D_2__Alphaproteobacteria	D_3__Rhizobiales	D_4__Bradyrhizobiaceae	D_5__Bosea
denovo12515	2	0	0	0	6	0	0	0	8	1	0	0	5	0	0	0	5	0	0	0	D_0__Bacteria	D_1__Proteobacteria	D_2__Alphaproteobacteria	D_3__Rickettsiales	D_4__Rickettsiaceae		D_6__uncultured bacterium
denovo12534	2	0	0	0	1	0	0	0	0	0	0	0	0	0	0	0	0	0	0	0	D_0__Bacteria	D_1__Bacteroidetes	D_2__Bacteroidetes BD2-2	D_3__uncultured bacterium	D_4__uncultured bacterium	D_5__uncultured bacterium	D_6__uncultured bacterium
denovo12589	2	0	0	0	1	0	0	0	0	0	0	0	4	0	0	0	2	0	0	0	D_0__Bacteria	D_1__Proteobacteria	D_2__Betaproteobacteria	D_3__Rhodocyclales	D_4__Rhodocyclaceae	D_5__Thauera	D_6__uncultured bacterium
denovo126	2	1	0	0	0	0	0	0	2	1	0	0	4	1	0	0	2	0	0	0	D_0__Bacteria	D_1__Proteobacteria	D_2__Gammaproteobacteria	D_3__Xanthomonadales	D_4__Xanthomonadaceae	D_5__Thermomonas	D_6__uncultured bacterium
denovo1261	2	0	0	0	0	0	0	0	4	0	0	0	0	0	0	0	1	0	0	0	D_0__Bacteria	D_1__Bacteroidetes	D_2__Flavobacteriia	D_3__Flavobacteriales	D_4__Flavobacteriaceae		D_6__uncultured bacterium
denovo12698	2	0	0	0	2	0	0	0	2	0	0	0	3	0	0	0	3	0	0	0	D_0__Bacteria	D_1__Spirochaetae	D_2__Spirochaetes	D_3__Spirochaetales	D_4__Leptospiraceae	D_5__Leptospira	D_6__uncultured bacterium
denovo12797	2	0	0	0	0	1	0	0	2	0	0	0	1	1	0	0	1	0	0	0	D_0__Bacteria	D_1__Chloroflexi	D_2__Thermomicrobia	D_3__JG30-KF-CM45	D_4__uncultured bacterium	D_5__uncultured bacterium	D_6__uncultured bacterium
denovo12839	2	1	2	0	0	0	0	0	1	0	0	0	1	0	0	0	1	0	0	0	D_0__Bacteria	D_1__Proteobacteria	D_2__Gammaproteobacteria	D_3__Pseudomonadales	D_4__Moraxellaceae	D_5__uncultured	D_6__uncultured bacterium
denovo12852	2	0	0	0	0	0	0	0	0	0	0	0	0	0	0	0	0	0	0	0	D_0__Bacteria	D_1__Proteobacteria	D_2__Alphaproteobacteria	D_3__Rhodobacterales	D_4__Rhodobacteraceae	D_5__Rhodobacter
denovo12859	2	0	0	0	0	0	0	0	0	0	0	0	0	0	0	0	0	0	0	0	D_0__Bacteria	D_1__Proteobacteria	D_2__Deltaproteobacteria	D_3__Bdellovibrionales	D_4__Bacteriovoracaceae	D_5__Bacteriovorax	D_6__uncultured rumen bacterium
denovo12862	2	0	0	0	0	0	0	0	0	0	0	0	0	0	0	0	0	0	0	0	Unassigned
denovo12867	2	0	0	0	1	0	0	0	0	0	0	0	2	0	0	0	0	0	0	0	D_0__Bacteria	D_1__Firmicutes	D_2__Clostridia	D_3__Clostridiales	D_4__Peptostreptococcaceae	D_5__Proteocatella	D_6__uncultured bacterium
denovo12883	2	0	0	0	1	0	0	0	1	0	0	0	2	0	0	1	0	0	0	0	D_0__Bacteria	D_1__Bacteroidetes	D_2__Flavobacteriia	D_3__Flavobacteriales	D_4__Flavobacteriaceae	D_5__Chryseobacterium
denovo12950	2	1	0	0	0	0	0	0	1	0	0	0	0	0	0	0	1	0	0	0	D_0__Bacteria	D_1__TM6
denovo13084	2	0	0	0	1	0	0	0	2	0	0	0	0	0	0	0	0	0	0	0	D_0__Bacteria	D_1__Proteobacteria	D_2__Betaproteobacteria	D_3__Burkholderiales	D_4__Comamonadaceae	D_5__Comamonas	D_6__uncultured bacterium
denovo13196	2	0	0	0	2	0	0	0	2	0	0	0	6	0	0	0	1	0	0	0	D_0__Bacteria	D_1__Proteobacteria	D_2__Betaproteobacteria	D_3__Rhodocyclales	D_4__Rhodocyclaceae	D_5__Azospira	D_6__uncultured bacterium
denovo13379	2	0	0	0	3	0	0	0	3	0	0	0	1	0	0	0	4	0	0	0	D_0__Bacteria	D_1__Proteobacteria	D_2__Deltaproteobacteria	D_3__Bdellovibrionales	D_4__Bdellovibrionaceae	D_5__Bdellovibrio	D_6__uncultured bacterium
denovo1343	2	0	0	0	1	0	0	0	1	0	0	0	3	0	0	0	4	0	0	0	D_0__Bacteria	D_1__Proteobacteria	D_2__Gammaproteobacteria	D_3__Xanthomonadales	D_4__Xanthomonadaceae	D_5__Dokdonella	D_6__uncultured bacterium
denovo13463	2	0	0	0	0	0	0	0	0	0	0	0	2	0	0	0	0	0	0	0	D_0__Bacteria	D_1__Proteobacteria	D_2__Betaproteobacteria	D_3__Burkholderiales	D_4__Comamonadaceae	D_5__Acidovorax	D_6__uncultured bacterium
denovo13519	2	0	0	0	0	0	0	0	1	0	0	0	1	0	0	0	1	0	0	0	D_0__Bacteria	D_1__Bacteroidetes	D_2__Sphingobacteriia	D_3__Sphingobacteriales	D_4__Chitinophagaceae	D_5__Hydrotalea	D_6__uncultured bacterium
denovo1353	2	0	0	0	0	0	0	0	0	0	0	0	0	0	0	0	0	0	0	0	Unassigned
denovo13559	2	3	0	0	5	4	0	0	5	5	0	0	5	1	0	0	13	15	1	0	D_0__Bacteria	D_1__Firmicutes	D_2__Clostridia	D_3__Clostridiales	D_4__Family XIII	D_5__[Eubacterium] nodatum group	D_6__uncultured rumen bacterium
denovo13564	2	0	0	0	1	0	0	0	1	0	0	0	1	0	0	0	0	0	0	0	D_0__Bacteria	D_1__Proteobacteria	D_2__Deltaproteobacteria	D_3__Bdellovibrionales	D_4__Bacteriovoracaceae	D_5__Peredibacter	D_6__uncultured bacterium
denovo13588	2	0	0	0	2	0	0	0	0	1	1	0	0	0	0	0	1	0	0	2	D_0__Bacteria	D_1__Firmicutes	D_2__Clostridia	D_3__Clostridiales	D_4__Ruminococcaceae	D_5__Anaerofilum	D_6__uncultured bacterium
denovo13618	2	1	0	0	5	0	0	0	0	0	0	0	0	0	0	0	4	0	0	0	D_0__Bacteria	D_1__Bacteroidetes	D_2__Bacteroidia	D_3__Bacteroidales	D_4__Rikenellaceae	D_5__dgA-11 gut group
denovo13840	2	0	0	0	2	0	0	0	2	0	0	0	1	0	0	0	1	0	0	0	D_0__Bacteria	D_1__Proteobacteria	D_2__Deltaproteobacteria	D_3__Myxococcales	D_4__Phaselicystidaceae	D_5__Phaselicystis	D_6__uncultured bacterium
denovo13882	2	0	0	0	2	0	0	0	2	0	0	0	1	0	0	0	5	0	0	0	D_0__Bacteria	D_1__Proteobacteria	D_2__Alphaproteobacteria	D_3__Rickettsiales	D_4__SM2D12	D_5__uncultured bacterium
denovo139	2	0	0	0	1	0	0	0	0	0	0	0	0	0	0	0	0	0	0	0	D_0__Bacteria	D_1__Proteobacteria	D_2__Epsilonproteobacteria	D_3__Campylobacterales	D_4__Campylobacteraceae	D_5__Arcobacter	D_6__uncultured bacterium
denovo14044	2	0	0	0	1	0	0	0	0	1	0	0	1	0	0	0	0	0	0	0	D_0__Bacteria	D_1__Bacteroidetes	D_2__Sphingobacteriia	D_3__Sphingobacteriales	D_4__Chitinophagaceae	D_5__uncultured	D_6__uncultured bacterium
denovo1409	2	0	0	0	0	0	0	0	1	0	0	0	0	0	0	0	1	0	0	0	D_0__Bacteria	D_1__Verrucomicrobia	D_2__OPB35 soil group	D_3__uncultured bacterium	D_4__uncultured bacterium	D_5__uncultured bacterium
denovo14101	2	0	0	0	0	0	0	0	0	0	0	0	1	0	0	0	0	0	0	0	D_0__Bacteria	D_1__Proteobacteria	D_2__Epsilonproteobacteria	D_3__Campylobacterales	D_4__Campylobacteraceae	D_5__Arcobacter	D_6__uncultured bacterium
denovo1414	2	0	0	0	2	0	0	0	3	0	0	0	0	0	0	0	2	0	0	0	D_0__Bacteria	D_1__Firmicutes	D_2__Erysipelotrichia	D_3__Erysipelotrichales	D_4__Erysipelotrichaceae	D_5__Erysipelotrichaceae UCG-004	D_6__uncultured bacterium
denovo14199	2	0	0	0	2	0	0	0	0	0	0	0	1	0	0	0	2	0	0	0	D_0__Bacteria	D_1__Proteobacteria	D_2__Gammaproteobacteria	D_3__NKB5	D_4__uncultured bacterium	D_5__uncultured bacterium
denovo14223	2	0	0	0	0	0	0	0	0	0	0	0	3	0	0	0	2	0	0	0	D_0__Bacteria	D_1__Firmicutes	D_2__Clostridia	D_3__Clostridiales	D_4__Ruminococcaceae	D_5__Ruminococcaceae NK4A214 group	D_6__uncultured bacterium
denovo14234	2	0	0	0	2	0	0	0	3	0	0	0	1	0	0	0	2	0	0	0	D_0__Bacteria	D_1__Proteobacteria	D_2__Gammaproteobacteria	D_3__Enterobacteriales	D_4__Enterobacteriaceae	D_5__Ewingella
denovo14268	2	0	0	0	0	0	0	0	0	0	0	0	0	0	0	0	1	0	0	0	D_0__Bacteria	D_1__Proteobacteria	D_2__Betaproteobacteria	D_3__Hot Creek 32	D_4__uncultured bacterium	D_5__uncultured bacterium	D_6__uncultured bacterium
denovo14295	2	0	0	0	0	0	0	0	0	0	0	0	0	0	0	0	1	1	0	0	D_0__Bacteria	D_1__Proteobacteria	D_2__Betaproteobacteria	D_3__Rhodocyclales	D_4__Rhodocyclaceae	D_5__12up
denovo14468	2	0	0	0	1	0	0	0	2	0	0	0	4	0	0	0	2	0	0	0	D_0__Bacteria	D_1__Saccharibacteria	D_2__uncultured bacterium	D_3__uncultured bacterium	D_4__uncultured bacterium	D_5__uncultured bacterium	D_6__uncultured bacterium
denovo14529	2	1	0	0	1	0	0	0	2	0	0	0	1	0	0	0	0	0	0	0	D_0__Bacteria	D_1__Proteobacteria	D_2__Deltaproteobacteria	D_3__Bdellovibrionales	D_4__Bdellovibrionaceae	D_5__Bdellovibrio
denovo14570	2	0	0	0	1	0	0	0	0	0	0	0	0	0	0	0	3	0	0	0	D_0__Bacteria	D_1__Proteobacteria	D_2__Deltaproteobacteria	D_3__Bdellovibrionales	D_4__Bdellovibrionaceae	D_5__OM27 clade	D_6__uncultured bacterium
denovo14605	2	0	0	0	1	0	0	0	1	0	0	0	1	0	0	0	0	0	0	0	D_0__Bacteria	D_1__Firmicutes	D_2__Clostridia	D_3__Clostridiales	D_4__Lachnospiraceae	D_5__Lachnoclostridium	D_6__uncultured bacterium
denovo14613	2	0	0	0	0	0	0	0	4	0	0	0	1	0	0	0	0	0	0	0	D_0__Bacteria	D_1__Bacteroidetes	D_2__Sphingobacteriia	D_3__Sphingobacteriales	D_4__Chitinophagaceae	D_5__Filimonas	D_6__uncultured bacterium
denovo14802	2	1	0	0	2	0	0	0	3	0	0	0	6	0	0	0	4	0	0	0	D_0__Bacteria	D_1__Proteobacteria	D_2__Gammaproteobacteria	D_3__Xanthomonadales	D_4__Xanthomonadaceae	D_5__Chiayiivirga
denovo14833	2	0	0	0	1	0	0	0	0	0	0	0	0	0	0	0	0	0	0	0	D_0__Bacteria	D_1__Firmicutes	D_2__Clostridia	D_3__Clostridiales	D_4__Ruminococcaceae	D_5__Ruminococcus 1
denovo14842	2	0	0	0	1	0	0	0	3	0	0	0	3	0	0	0	1	0	0	0	D_0__Bacteria	D_1__Proteobacteria	D_2__Deltaproteobacteria	D_3__Desulfovibrionales	D_4__Desulfovibrionaceae	D_5__Desulfovibrio	D_6__uncultured bacterium
denovo14895	2	0	0	0	0	0	0	0	0	0	0	0	0	0	0	0	0	0	0	0	D_0__Bacteria	D_1__Proteobacteria	D_2__Alphaproteobacteria	D_3__Sphingomonadales	D_4__Erythrobacteraceae	D_5__Altererythrobacter	D_6__uncultured bacterium
denovo14982	2	5	1	0	0	2	1	0	1	0	0	0	0	1	0	0	0	1	0	0	D_0__Bacteria	D_1__Proteobacteria	D_2__Betaproteobacteria	D_3__Burkholderiales	D_4__Burkholderiaceae	D_5__Limnobacter	D_6__uncultured bacterium
denovo15015	2	0	0	0	0	0	0	0	0	0	0	0	0	0	0	0	1	0	0	0	D_0__Bacteria	D_1__Bacteroidetes	D_2__Bacteroidia	D_3__Bacteroidales	D_4__Rikenellaceae	D_5__U29-B03
denovo15055	2	0	0	0	0	0	0	0	0	0	0	0	0	0	0	0	1	0	0	0	Unassigned						D_6__uncultured bacterium
denovo15081	2	0	0	0	2	0	0	0	1	0	0	0	1	0	0	0	1	0	0	0	D_0__Bacteria	D_1__Proteobacteria	D_2__Deltaproteobacteria	D_3__Myxococcales	D_4__Haliangiaceae	D_5__Haliangium
denovo15157	2	0	0	0	1	0	0	0	1	0	0	0	0	0	0	0	1	0	0	0	D_0__Bacteria	D_1__Hydrogenedentes	D_2__uncultured bacterium	D_3__uncultured bacterium	D_4__uncultured bacterium	D_5__uncultured bacterium
denovo15232	2	1	0	0	0	0	0	0	0	0	0	0	0	0	0	0	1	0	0	0	D_0__Bacteria	D_1__Proteobacteria	D_2__Deltaproteobacteria	D_3__Desulfovibrionales	D_4__Desulfovibrionaceae	D_5__Desulfovibrio	D_6__uncultured bacterium
denovo15247	2	0	0	0	2	0	0	0	3	0	0	0	2	0	0	0	2	0	0	0	D_0__Bacteria	D_1__Bacteroidetes	D_2__Flavobacteriia	D_3__Flavobacteriales	D_4__Flavobacteriaceae
denovo1525	2	1	0	0	1	1	0	0	0	0	0	0	0	0	0	0	0	22	0	0	D_0__Bacteria	D_1__Firmicutes	D_2__Clostridia	D_3__Clostridiales	D_4__Lachnospiraceae	D_5__Roseburia
denovo15252	2	0	0	0	0	0	0	0	0	0	0	0	0	0	0	0	0	0	0	0	D_0__Bacteria	D_1__Proteobacteria	D_2__Betaproteobacteria	D_3__Neisseriales	D_4__Neisseriaceae	D_5__Uruburuella	D_6__uncultured bacterium
denovo15306	2	0	0	0	1	0	0	0	2	0	0	0	2	0	0	0	0	0	0	0	D_0__Bacteria	D_1__Firmicutes	D_2__Erysipelotrichia	D_3__Erysipelotrichales	D_4__Erysipelotrichaceae	D_5__Erysipelotrichaceae UCG-004
denovo15308	2	0	0	0	6	0	0	0	3	0	0	0	5	0	0	0	3	1	0	0	D_0__Bacteria	D_1__Bacteroidetes	D_2__Bacteroidia	D_3__Bacteroidales	D_4__Porphyromonadaceae	D_5__Barnesiella	D_6__uncultured bacterium
denovo15317	2	0	0	0	2	0	0	0	2	0	0	0	0	0	0	0	0	0	0	0	D_0__Bacteria	D_1__Bacteroidetes	D_2__Sphingobacteriia	D_3__Sphingobacteriales	D_4__Chitinophagaceae	D_5__Sediminibacterium
denovo15325	2	3	0	0	7	3	1	0	4	2	0	0	3	2	1	0	6	0	1	0	D_0__Bacteria	D_1__Proteobacteria	D_2__Alphaproteobacteria	D_3__Rhodospirillales	D_4__Rhodospirillales Incertae Sedis	D_5__Reyranella
denovo15459	2	0	0	0	1	0	0	0	4	0	0	0	5	0	0	0	4	0	0	0	D_0__Bacteria	D_1__Proteobacteria	D_2__Gammaproteobacteria	D_3__Oceanospirillales	D_4__Oceanospirillaceae	D_5__Pseudospirillum	D_6__uncultured bacterium
denovo15615	2	0	0	0	0	0	0	0	4	0	0	0	0	0	0	0	0	0	0	0	D_0__Bacteria	D_1__Firmicutes	D_2__Erysipelotrichia	D_3__Erysipelotrichales	D_4__Erysipelotrichaceae	D_5__Erysipelotrichaceae UCG-004
denovo157	2	3	3	2	1	1	0	2	1	0	0	0	0	0	0	0	0	0	0	0	D_0__Bacteria	D_1__Elusimicrobia	D_2__Elusimicrobia	D_3__Lineage I (Endomicrobia)
denovo15784	2	0	0	0	0	0	0	0	0	0	0	0	0	0	0	0	0	0	0	0	D_0__Bacteria	D_1__Firmicutes	D_2__Clostridia	D_3__Clostridiales	D_4__Ruminococcaceae	D_5__Oscillibacter	D_6__uncultured bacterium
denovo15947	2	2	0	0	1	1	0	0	2	0	1	0	10	0	0	0	0	0	0	0	D_0__Bacteria	D_1__Proteobacteria	D_2__Alphaproteobacteria	D_3__Rhodobacterales	D_4__Rhodobacteraceae	D_5__Haematobacter	D_6__uncultured bacterium
denovo160	2	0	0	0	5	0	0	0	6	1	0	0	0	0	0	0	2	0	0	0	D_0__Bacteria	D_1__Firmicutes	D_2__Clostridia	D_3__Clostridiales	D_4__Ruminococcaceae	D_5__Ruminococcaceae UCG-014	D_6__uncultured bacterium
denovo16050	2	0	0	0	6	1	1	0	5	0	0	0	3	0	0	0	2	2	0	0	D_0__Bacteria	D_1__Proteobacteria	D_2__Alphaproteobacteria	D_3__Sphingomonadales	D_4__Sphingomonadaceae	D_5__Novosphingobium	D_6__uncultured rumen bacterium
denovo1611	2	0	0	0	1	0	0	0	0	0	1	0	1	0	0	0	0	0	0	0	D_0__Bacteria	D_1__Synergistetes	D_2__Synergistia	D_3__Synergistales	D_4__Synergistaceae	D_5__uncultured	D_6__uncultured bacterium
denovo16115	2	0	0	0	0	0	0	0	5	0	0	0	0	0	0	0	3	0	0	1	Unassigned
denovo16195	2	0	0	0	1	0	0	0	0	0	0	0	0	0	0	0	1	0	0	0	D_0__Bacteria	D_1__Acidobacteria	D_2__Acidobacteria	D_3__Subgroup 6	D_4__uncultured bacterium	D_5__uncultured bacterium	D_6__uncultured bacterium
denovo16294	2	0	0	0	1	0	0	0	1	0	0	0	2	0	0	0	2	0	0	0	D_0__Bacteria	D_1__Proteobacteria	D_2__Deltaproteobacteria	D_3__Bdellovibrionales	D_4__Bacteriovoracaceae	D_5__Bacteriovorax	D_6__uncultured bacterium
denovo16296	2	0	0	0	0	0	0	0	0	0	0	0	0	0	0	0	0	0	0	0	D_0__Bacteria	D_1__Proteobacteria	D_2__Deltaproteobacteria	D_3__Bdellovibrionales	D_4__Bdellovibrionaceae	D_5__Bdellovibrio	D_6__uncultured bacterium
denovo16305	2	0	0	0	0	0	0	0	5	0	0	0	3	0	0	0	3	0	0	0	D_0__Bacteria	D_1__Firmicutes	D_2__Clostridia	D_3__Clostridiales	D_4__Ruminococcaceae	D_5__Ruminococcaceae V9D2013 group
denovo16307	2	0	0	0	2	0	0	0	0	0	0	0	3	0	0	0	0	0	0	0	D_0__Bacteria	D_1__Firmicutes	D_2__Clostridia	D_3__Clostridiales	D_4__Ruminococcaceae	D_5__[Eubacterium] coprostanoligenes group
denovo16431	2	0	0	0	3	0	0	0	1	0	0	0	3	0	0	0	2	0	0	0	Unassigned
denovo16548	2	1	0	0	1	10	0	0	0	11	8	0	0	2	0	0	0	0	0	0	D_0__Bacteria	D_1__Bacteroidetes	D_2__Bacteroidia	D_3__Bacteroidales	D_4__Prevotellaceae	D_5__Prevotella 1
denovo16630	2	1	0	0	2	0	0	0	1	0	0	0	0	0	0	0	0	0	0	0	D_0__Bacteria	D_1__Proteobacteria	D_2__Betaproteobacteria	D_3__Burkholderiales	D_4__Comamonadaceae	D_5__Acidovorax	D_6__uncultured bacterium
denovo1666	2	0	0	0	1	0	0	0	0	0	0	0	0	0	0	0	1	0	0	0	Unassigned
denovo16734	2	0	0	0	2	0	0	0	2	0	0	0	2	0	0	0	2	0	0	0	D_0__Bacteria	D_1__Proteobacteria	D_2__Deltaproteobacteria	D_3__Desulfovibrionales	D_4__Desulfomicrobiaceae	D_5__Desulfomicrobium	D_6__uncultured Lachnospiraceae bacterium
denovo16766	2	0	0	0	1	0	0	0	2	0	0	0	0	0	0	0	0	0	0	0	D_0__Bacteria	D_1__Proteobacteria	D_2__Gammaproteobacteria	D_3__Pseudomonadales	D_4__Moraxellaceae	D_5__Acinetobacter
denovo1678	2	1	0	0	0	0	0	0	0	0	0	0	0	0	0	0	2	0	0	0	D_0__Bacteria	D_1__Bacteroidetes	D_2__Cytophagia	D_3__Cytophagales	D_4__Cytophagaceae	D_5__Leadbetterella
denovo16817	2	0	0	0	1	0	0	0	0	0	0	0	1	0	0	0	1	0	0	0	D_0__Bacteria	D_1__Proteobacteria	D_2__Gammaproteobacteria	D_3__Xanthomonadales	D_4__Xanthomonadaceae	D_5__Arenimonas	D_6__uncultured bacterium
denovo1691	2	0	0	0	0	0	0	0	0	0	1	0	1	0	0	0	0	0	0	0	D_0__Bacteria	D_1__Gemmatimonadetes	D_2__Gemmatimonadetes	D_3__Gemmatimonadales	D_4__Gemmatimonadaceae	D_5__uncultured
denovo17049	2	0	0	0	0	0	0	0	0	0	0	0	0	0	0	0	0	0	0	0	D_0__Bacteria	D_1__Proteobacteria	D_2__Alphaproteobacteria	D_3__Rickettsiales	D_4__Mitochondria	D_5__uncultured rumen bacterium
denovo17169	2	0	0	0	0	0	0	0	0	0	0	0	0	0	0	0	0	0	0	0	D_0__Bacteria	D_1__Bacteroidetes	D_2__Bacteroidia	D_3__Bacteroidales	D_4__Porphyromonadaceae		D_6__uncultured bacterium
denovo1718	2	0	0	0	0	0	0	0	0	0	0	0	0	0	0	0	0	0	0	0	D_0__Bacteria	D_1__Proteobacteria	D_2__Betaproteobacteria	D_3__Burkholderiales	D_4__Comamonadaceae	D_5__Aquabacterium	D_6__uncultured bacterium
denovo17191	2	0	0	0	0	0	0	0	0	0	0	0	0	0	0	0	0	0	0	0	Unassigned						D_6__uncultured bacterium
denovo17236	2	0	0	0	0	0	0	0	2	0	0	0	1	0	0	0	4	0	0	0	D_0__Bacteria	D_1__Proteobacteria	D_2__Gammaproteobacteria	D_3__Enterobacteriales	D_4__Enterobacteriaceae		D_6__uncultured bacterium
denovo17253	2	0	0	0	2	0	0	0	2	0	0	0	0	0	0	0	1	0	0	0	D_0__Bacteria	D_1__Proteobacteria	D_2__Deltaproteobacteria	D_3__Desulfuromonadales	D_4__Desulfuromonadaceae	D_5__Pelobacter	D_6__uncultured bacterium
denovo17472	2	1	0	0	3	0	0	0	1	0	0	0	1	0	0	0	0	0	0	0	D_0__Bacteria	D_1__Bacteroidetes	D_2__Bacteroidia	D_3__Bacteroidales	D_4__Porphyromonadaceae		D_6__uncultured bacterium
denovo17512	2	0	0	0	0	0	0	0	0	0	0	0	0	0	0	0	1	0	0	0	D_0__Bacteria	D_1__Fusobacteria	D_2__Fusobacteriia	D_3__Fusobacteriales	D_4__Fusobacteriaceae	D_5__Fusobacterium	D_6__uncultured organism
denovo17555	2	0	0	0	1	0	0	0	1	0	0	0	1	0	0	0	0	0	0	0	Unassigned
denovo17600	2	0	1	0	5	0	0	0	4	0	0	0	3	0	0	0	6	0	0	0	D_0__Bacteria	D_1__Proteobacteria	D_2__Betaproteobacteria	D_3__Burkholderiales	D_4__Comamonadaceae	D_5__uncultured	D_6__uncultured bacterium
denovo17603	2	0	0	0	0	0	0	0	0	0	0	0	0	0	0	0	0	0	0	0	D_0__Bacteria	D_1__Proteobacteria	D_2__Epsilonproteobacteria	D_3__Campylobacterales	D_4__Helicobacteraceae	D_5__Sulfurimonas
denovo17700	2	0	0	0	1	0	0	0	0	0	0	0	0	0	0	0	0	0	0	0	D_0__Bacteria	D_1__Proteobacteria	D_2__Gammaproteobacteria	D_3__Pseudomonadales	D_4__Pseudomonadaceae	D_5__Pseudomonas	D_6__uncultured bacterium
denovo17864	2	0	0	0	0	0	0	0	1	0	2	0	0	0	0	0	1	0	0	0	D_0__Bacteria	D_1__Bacteroidetes	D_2__Bacteroidia	D_3__Bacteroidales	D_4__Prevotellaceae	D_5__Prevotella 7	D_6__uncultured bacterium
denovo18357	2	0	0	0	0	0	0	0	1	0	0	0	1	0	0	0	0	168	23	2	D_0__Bacteria	D_1__Firmicutes	D_2__Clostridia	D_3__Clostridiales	D_4__Lachnospiraceae	D_5__uncultured	D_6__uncultured bacterium
denovo18364	2	0	0	0	3	0	0	0	3	0	0	0	1	0	0	0	2	0	0	0	D_0__Bacteria	D_1__Proteobacteria	D_2__Alphaproteobacteria	D_3__DB1-14	D_4__uncultured bacterium	D_5__uncultured bacterium	D_6__uncultured bacterium
denovo18402	2	0	0	0	1	0	0	0	0	0	0	0	2	0	0	0	0	0	0	0	D_0__Bacteria	D_1__Proteobacteria	D_2__Gammaproteobacteria	D_3__Xanthomonadales	D_4__Xanthomonadaceae	D_5__Stenotrophomonas
denovo18446	2	0	0	0	5	0	0	0	6	0	0	0	3	0	0	0	6	0	0	0	D_0__Bacteria	D_1__Proteobacteria	D_2__Betaproteobacteria	D_3__Burkholderiales	D_4__Comamonadaceae	D_5__uncultured	D_6__uncultured bacterium
denovo18477	2	0	0	0	1	0	0	0	0	0	0	0	0	0	0	0	0	0	0	0	D_0__Bacteria	D_1__Proteobacteria	D_2__Alphaproteobacteria	D_3__Sphingomonadales	D_4__Sphingomonadaceae	D_5__Sphingomonas	D_6__uncultured bacterium
denovo1851	2	0	0	0	1	0	0	0	0	0	0	0	1	0	0	0	1	0	0	0	D_0__Bacteria	D_1__Proteobacteria	D_2__Alphaproteobacteria	D_3__Caulobacterales	D_4__Caulobacteraceae	D_5__Brevundimonas
denovo18558	2	0	0	0	0	0	0	0	2	0	0	0	2	0	0	0	3	0	0	0	D_0__Bacteria	D_1__Proteobacteria	D_2__Betaproteobacteria	D_3__Burkholderiales	D_4__Comamonadaceae	D_5__Hydrogenophaga
denovo1867	2	2	0	0	0	0	0	0	0	0	0	0	0	0	0	0	1	0	0	0	D_0__Bacteria	D_1__Firmicutes	D_2__Clostridia	D_3__Clostridiales	D_4__Lachnospiraceae	D_5__Lachnospiraceae NK4A136 group	D_6__uncultured actinobacterium
denovo18780	2	0	0	0	2	0	0	0	1	0	0	0	2	0	0	0	1	0	0	0	D_0__Bacteria	D_1__Acidobacteria	D_2__Holophagae	D_3__Subgroup 10	D_4__ABS-19	D_5__uncultured bacterium	D_6__uncultured bacterium
denovo18803	2	0	0	0	0	0	0	0	0	0	0	0	0	0	0	0	3	0	0	0	Unassigned
denovo18905	2	0	0	0	0	0	0	0	0	0	0	0	0	0	0	0	0	0	0	0	D_0__Bacteria	D_1__Saccharibacteria	D_2__uncultured bacterium	D_3__uncultured bacterium	D_4__uncultured bacterium	D_5__uncultured bacterium	D_6__uncultured bacterium
denovo1905	2	0	0	0	0	0	0	0	0	0	1	0	2	0	0	0	0	0	0	0	D_0__Bacteria	D_1__Proteobacteria	D_2__Betaproteobacteria	D_3__Burkholderiales	D_4__Comamonadaceae		D_6__uncultured bacterium
denovo19055	2	0	1	0	2	0	0	0	3	0	0	0	3	0	0	0	3	0	0	0	D_0__Bacteria	D_1__Chloroflexi	D_2__Caldilineae	D_3__Caldilineales	D_4__Caldilineaceae	D_5__uncultured
denovo19071	2	0	0	0	0	0	0	0	0	0	0	0	0	0	0	0	0	0	0	0	D_0__Bacteria	D_1__Bacteroidetes	D_2__Sphingobacteriia	D_3__Sphingobacteriales	D_4__Saprospiraceae	D_5__uncultured
denovo19134	2	0	1	0	1	0	0	0	2	0	0	0	0	0	0	0	0	248	6	3	D_0__Bacteria	D_1__Firmicutes	D_2__Clostridia	D_3__Clostridiales	D_4__Lachnospiraceae	D_5__Coprococcus 3	D_6__uncultured bacterium
denovo19148	2	0	0	0	0	1	0	0	0	0	0	0	0	0	0	0	0	0	0	0	D_0__Bacteria	D_1__Firmicutes	D_2__Clostridia	D_3__Clostridiales	D_4__Family XI	D_5__uncultured
denovo19154	2	0	0	0	0	0	0	0	0	0	0	0	1	0	0	0	1	0	0	0	D_0__Bacteria	D_1__Proteobacteria	D_2__Gammaproteobacteria	D_3__Xanthomonadales	D_4__Xanthomonadaceae	D_5__Thermomonas	D_6__uncultured bacterium
denovo19157	2	58	2	0	1	3	0	0	2	6	1	0	3	12	0	0	2	1	0	0	D_0__Bacteria	D_1__Bacteroidetes	D_2__Bacteroidia	D_3__Bacteroidales	D_4__Prevotellaceae	D_5__Prevotella 7	D_6__uncultured rumen bacterium
denovo19229	2	72	0	0	1	22	1	0	0	22	0	0	0	67	0	0	0	0	0	0	D_0__Bacteria	D_1__Bacteroidetes	D_2__Bacteroidia	D_3__Bacteroidales	D_4__Prevotellaceae	D_5__Prevotella 7
denovo19451	2	0	0	0	1	0	0	0	1	0	0	0	1	0	0	0	0	0	0	0	D_0__Bacteria	D_1__Bacteroidetes	D_2__Sphingobacteriia	D_3__Sphingobacteriales	D_4__WCHB1-69	D_5__uncultured bacterium	D_6__uncultured bacterium
denovo19541	2	1	0	0	6	0	0	0	4	0	0	0	0	0	0	0	3	0	0	0	D_0__Bacteria	D_1__Proteobacteria	D_2__Betaproteobacteria	D_3__Burkholderiales	D_4__Comamonadaceae		D_6__uncultured bacterium
denovo19681	2	0	0	0	0	0	0	0	1	0	0	0	0	0	0	0	0	0	0	0	D_0__Bacteria	D_1__Bacteroidetes	D_2__Flavobacteriia	D_3__Flavobacteriales	D_4__Flavobacteriaceae	D_5__Chryseobacterium	D_6__Megasphaera sp. TrE9262
denovo19752	2	0	0	0	0	0	0	0	0	0	0	0	0	0	0	0	0	0	0	0	D_0__Bacteria	D_1__Actinobacteria	D_2__Acidimicrobiia	D_3__Acidimicrobiales	D_4__uncultured
denovo19805	2	0	0	0	1	0	0	0	0	0	0	0	4	0	0	0	0	0	0	0	D_0__Bacteria	D_1__Proteobacteria	D_2__Gammaproteobacteria	D_3__Aeromonadales	D_4__Aeromonadaceae	D_5__Tolumonas	D_6__uncultured bacterium
denovo19847	2	0	0	1	0	0	0	0	0	0	0	0	1	0	0	0	0	0	0	0	D_0__Bacteria	D_1__Proteobacteria	D_2__Gammaproteobacteria	D_3__Pseudomonadales	D_4__Moraxellaceae	D_5__uncultured	D_6__uncultured bacterium
denovo19856	2	0	0	0	1	0	0	0	1	0	0	0	0	0	0	0	2	0	0	0	Unassigned						D_6__uncultured bacterium
denovo20006	2	0	0	0	3	0	0	0	2	0	0	0	6	0	0	0	2	0	0	0	D_0__Bacteria	D_1__Verrucomicrobia	D_2__Verrucomicrobiae	D_3__Verrucomicrobiales	D_4__Verrucomicrobiaceae	D_5__Prosthecobacter
denovo20069	2	2	0	4	1	0	0	0	0	0	0	0	0	0	0	0	2	0	0	0	D_0__Bacteria	D_1__Bacteroidetes	D_2__Flavobacteriia	D_3__Flavobacteriales	D_4__Flavobacteriaceae	D_5__Moheibacter
denovo20160	2	0	0	0	1	0	0	0	0	0	0	0	2	0	0	0	1	0	0	0	D_0__Bacteria	D_1__Firmicutes	D_2__Clostridia	D_3__Clostridiales	D_4__Christensenellaceae	D_5__Christensenellaceae R-7 group	D_6__uncultured bacterium
denovo20210	2	0	0	0	2	0	0	0	0	0	0	0	0	0	0	0	1	0	0	0	D_0__Bacteria	D_1__Bacteroidetes	D_2__Flavobacteriia	D_3__Flavobacteriales	D_4__Flavobacteriaceae	D_5__Flavobacterium	D_6__uncultured alpha proteobacterium
denovo20224	2	3	0	0	3	0	0	0	2	0	0	0	4	0	0	0	4	0	0	0	D_0__Bacteria	D_1__Proteobacteria	D_2__Deltaproteobacteria	D_3__Desulfuromonadales	D_4__Geobacteraceae	D_5__Geobacter
denovo20243	2	1	0	0	0	0	0	0	0	0	0	0	0	0	0	0	0	0	0	0	D_0__Bacteria	D_1__Synergistetes	D_2__Synergistia	D_3__Synergistales	D_4__Synergistaceae	D_5__Candidatus Tammella
denovo20267	2	0	0	0	5	0	0	0	1	0	0	0	2	0	0	0	2	0	0	0	D_0__Bacteria	D_1__Proteobacteria	D_2__Deltaproteobacteria	D_3__Myxococcales	D_4__Haliangiaceae	D_5__Haliangium
denovo20348	2	0	0	0	0	0	0	0	0	0	0	0	1	0	0	0	1	0	0	0	D_0__Bacteria	D_1__Proteobacteria	D_2__Alphaproteobacteria	D_3__DB1-14	D_4__uncultured bacterium	D_5__uncultured bacterium	D_6__uncultured bacterium
denovo20517	2	1	0	0	2	0	0	0	0	1	0	0	0	0	0	0	1	0	0	0	D_0__Bacteria	D_1__Proteobacteria	D_2__Alphaproteobacteria	D_3__Rhodospirillales	D_4__Rhodospirillales Incertae Sedis	D_5__Candidatus Alysiosphaera
denovo20519	2	1	0	0	3	0	0	0	1	0	0	0	4	0	0	0	3	0	0	0	D_0__Bacteria	D_1__Proteobacteria	D_2__Alphaproteobacteria	D_3__Rickettsiales	D_4__LWSR-14	D_5__uncultured bacterium	D_6__uncultured bacterium
denovo2065	2	0	0	0	0	0	0	0	0	0	0	0	0	0	0	0	0	0	0	0	D_0__Bacteria	D_1__Firmicutes	D_2__Clostridia	D_3__Clostridiales	D_4__Lachnospiraceae	D_5__Hespellia	D_6__uncultured bacterium
denovo2086	2	0	0	0	0	0	0	0	0	0	0	0	0	0	0	0	0	0	0	0	D_0__Bacteria	D_1__Proteobacteria	D_2__Deltaproteobacteria	D_3__Bdellovibrionales	D_4__Bdellovibrionaceae	D_5__Bdellovibrio	D_6__uncultured bacterium
denovo2087	2	0	0	0	0	0	0	0	1	0	0	0	0	0	0	0	0	0	0	0	Unassigned
denovo20924	2	0	0	0	0	0	0	0	1	0	0	0	0	0	0	0	0	0	0	0	D_0__Bacteria	D_1__Spirochaetae	D_2__Spirochaetes	D_3__Spirochaetales	D_4__PL-11B10	D_5__uncultured bacterium	D_6__uncultured bacterium
denovo20959	2	5	4	0	1	0	5	73	1	0	0	0	1	5	0	1	1	0	0	0	D_0__Bacteria	D_1__Firmicutes	D_2__Bacilli	D_3__Lactobacillales	D_4__Lactobacillaceae	D_5__Lactobacillus	D_6__uncultured bacterium
denovo20985	2	0	0	0	1	0	0	0	0	0	0	0	3	0	0	0	0	0	0	0	D_0__Bacteria	D_1__Saccharibacteria	D_2__uncultured bacterium	D_3__uncultured bacterium	D_4__uncultured bacterium	D_5__uncultured bacterium
denovo21149	2	0	0	0	0	0	0	0	0	0	0	0	0	0	0	0	0	0	0	0	Unassigned
denovo21154	2	0	0	0	2	0	0	0	2	0	0	0	2	0	0	0	1	0	0	0	D_0__Bacteria	D_1__Proteobacteria	D_2__Alphaproteobacteria	D_3__DB1-14
denovo2116	2	0	0	0	2	0	0	0	1	0	0	0	1	0	0	0	0	0	0	0	D_0__Bacteria	D_1__Proteobacteria	D_2__Betaproteobacteria	D_3__Burkholderiales	D_4__Comamonadaceae	D_5__uncultured	D_6__uncultured bacterium
denovo21177	2	0	0	0	1	0	0	0	0	0	0	0	0	0	0	0	0	0	0	0	D_0__Bacteria	D_1__Firmicutes	D_2__Erysipelotrichia	D_3__Erysipelotrichales	D_4__Erysipelotrichaceae	D_5__Erysipelotrichaceae UCG-004	D_6__uncultured bacterium
denovo212	2	0	0	0	0	0	0	0	1	0	0	0	0	0	0	0	0	0	0	0	D_0__Bacteria	D_1__Chlamydiae	D_2__Chlamydiae	D_3__Chlamydiales	D_4__Parachlamydiaceae	D_5__Neochlamydia	D_6__uncultured bacterium
denovo21202	2	0	0	0	0	0	0	0	1	0	0	0	0	0	0	0	0	0	0	0	D_0__Bacteria	D_1__Proteobacteria	D_2__Betaproteobacteria	D_3__Burkholderiales	D_4__Comamonadaceae	D_5__Acidovorax	D_6__uncultured bacterium
denovo21216	2	0	0	0	0	0	0	0	2	0	0	0	8	0	0	0	5	0	0	0	D_0__Bacteria	D_1__Bacteroidetes	D_2__Flavobacteriia	D_3__Flavobacteriales	D_4__Flavobacteriaceae	D_5__uncultured	D_6__uncultured bacterium
denovo21219	2	0	0	0	0	0	0	0	0	0	0	0	0	0	0	0	0	0	0	0	D_0__Bacteria	D_1__Proteobacteria	D_2__Betaproteobacteria	D_3__Rhodocyclales	D_4__Rhodocyclaceae	D_5__Sulfuritalea
denovo21259	2	0	0	0	1	0	0	0	2	1	0	0	9	0	0	0	1	0	0	0	D_0__Bacteria	D_1__Proteobacteria	D_2__Gammaproteobacteria	D_3__Pseudomonadales	D_4__Moraxellaceae	D_5__Acinetobacter	D_6__uncultured bacterium
denovo2144	2	0	0	0	1	0	0	0	2	0	0	0	0	0	0	0	3	0	0	0	D_0__Bacteria	D_1__Proteobacteria	D_2__Gammaproteobacteria	D_3__Aeromonadales	D_4__Aeromonadaceae	D_5__Aeromonas
denovo21445	2	1	0	0	2	0	0	0	2	0	0	0	5	0	0	0	4	0	0	0	D_0__Bacteria	D_1__Proteobacteria	D_2__Betaproteobacteria	D_3__Burkholderiales	D_4__Comamonadaceae	D_5__Comamonas	D_6__uncultured bacterium
denovo21528	2	0	0	0	0	0	0	0	1	0	0	0	3	0	0	0	0	0	0	0	D_0__Bacteria	D_1__Firmicutes	D_2__Negativicutes	D_3__Selenomonadales	D_4__Acidaminococcaceae	D_5__uncultured	D_6__uncultured bacterium
denovo21546	2	2	0	0	0	0	0	0	2	0	0	0	0	0	0	0	0	0	0	0	Unassigned
denovo21550	2	19	4	1	0	3	1	3	0	2	0	0	0	0	0	0	0	0	0	0	D_0__Bacteria	D_1__Firmicutes	D_2__Bacilli	D_3__Lactobacillales	D_4__Lactobacillaceae	D_5__Lactobacillus
denovo21589	2	0	0	0	0	0	0	0	0	0	0	0	0	0	0	0	0	0	0	0	D_0__Bacteria	D_1__Bacteroidetes	D_2__Flavobacteriia	D_3__Flavobacteriales	D_4__Flavobacteriaceae	D_5__Aequorivita	D_6__uncultured bacterium
denovo21640	2	0	0	0	3	0	0	0	1	0	0	0	3	0	0	0	2	0	0	0	D_0__Bacteria	D_1__Proteobacteria	D_2__Deltaproteobacteria	D_3__Desulfovibrionales	D_4__Desulfovibrionaceae	D_5__Desulfovibrio	D_6__uncultured bacterium
denovo21648	2	0	0	0	0	0	0	0	0	0	0	0	0	0	0	0	0	0	0	0	D_0__Bacteria	D_1__Proteobacteria	D_2__Betaproteobacteria	D_3__Hot Creek 32	D_4__uncultured bacterium	D_5__uncultured bacterium
denovo21738	2	1	0	0	1	0	0	0	3	0	1	0	2	0	0	0	1	0	0	0	D_0__Bacteria	D_1__Caldiserica	D_2__Caldisericia	D_3__Caldisericales	D_4__WCHB1-02	D_5__uncultured bacterium	D_6__uncultured bacterium
denovo21812	2	0	0	0	3	0	0	0	0	0	0	0	1	0	0	0	1	0	0	0	D_0__Bacteria	D_1__Proteobacteria	D_2__Deltaproteobacteria	D_3__Bdellovibrionales	D_4__Bdellovibrionaceae	D_5__OM27 clade	D_6__uncultured bacterium
denovo2190	2	0	0	0	0	0	0	0	0	0	0	0	0	0	0	0	0	0	0	0	D_0__Bacteria	D_1__Proteobacteria	D_2__Deltaproteobacteria	D_3__Desulfovibrionales	D_4__Desulfovibrionaceae	D_5__Desulfovibrio
denovo22090	2	0	0	0	0	0	0	0	1	0	0	0	0	0	0	0	2	0	0	0	D_0__Bacteria	D_1__Proteobacteria	D_2__Alphaproteobacteria	D_3__Sphingomonadales	D_4__Erythrobacteraceae	D_5__Altererythrobacter	D_6__uncultured bacterium
denovo22099	2	0	0	0	1	0	0	0	1	0	0	0	0	0	0	0	1	0	0	0	D_0__Bacteria	D_1__Bacteroidetes	D_2__Sphingobacteriia	D_3__Sphingobacteriales	D_4__Saprospiraceae	D_5__uncultured	D_6__uncultured bacterium
denovo22103	2	0	0	0	0	0	0	0	0	0	0	0	1	0	0	0	0	0	0	0	D_0__Bacteria	D_1__Proteobacteria	D_2__Epsilonproteobacteria	D_3__Campylobacterales	D_4__Campylobacteraceae	D_5__Arcobacter	D_6__uncultured bacterium
denovo22182	2	0	0	0	2	0	0	0	2	0	0	0	2	0	0	0	2	0	0	0	D_0__Bacteria	D_1__Proteobacteria	D_2__Gammaproteobacteria	D_3__NKB5	D_4__uncultured bacterium	D_5__uncultured bacterium
denovo22187	2	0	0	0	5	0	0	0	3	0	0	0	1	0	0	0	1	0	0	0	D_0__Bacteria	D_1__Proteobacteria	D_2__Gammaproteobacteria	D_3__Xanthomonadales	D_4__Xanthomonadaceae	D_5__Ignatzschineria
denovo22212	2	0	0	0	2	0	0	0	1	1	1	0	0	0	0	0	1	0	0	0	D_0__Bacteria	D_1__Bacteroidetes	D_2__Bacteroidia	D_3__Bacteroidales	D_4__Rikenellaceae	D_5__Rikenellaceae RC9 gut group	D_6__uncultured bacterium
denovo2236	2	1	0	0	0	0	0	0	0	0	0	0	0	0	0	0	1	0	0	0	D_0__Bacteria	D_1__Proteobacteria	D_2__Betaproteobacteria	D_3__Burkholderiales	D_4__Comamonadaceae	D_5__uncultured	D_6__uncultured bacterium
denovo2237	2	0	0	0	0	0	0	0	0	0	0	0	0	0	0	0	0	0	0	0	D_0__Bacteria	D_1__Proteobacteria	D_2__Betaproteobacteria	D_3__Hydrogenophilales	D_4__Hydrogenophilaceae		D_6__uncultured bacterium
denovo2330	2	0	0	0	0	0	0	0	2	0	0	0	1	0	0	0	2	0	0	0	D_0__Bacteria	D_1__Firmicutes	D_2__Clostridia	D_3__Clostridiales	D_4__Ruminococcaceae	D_5__[Eubacterium] coprostanoligenes group
denovo238	2	0	0	0	0	0	0	0	0	0	0	0	0	0	0	0	2	0	0	0	D_0__Bacteria	D_1__Proteobacteria	D_2__Gammaproteobacteria	D_3__Oceanospirillales	D_4__Halomonadaceae	D_5__Halomonas	D_6__uncultured bacterium
denovo2408	2	0	0	0	0	0	0	0	1	1	0	0	2	0	0	0	0	0	0	0	D_0__Bacteria	D_1__Proteobacteria	D_2__Alphaproteobacteria				D_6__uncultured bacterium
denovo2425	2	0	0	0	0	0	0	0	2	0	0	0	0	0	0	0	1	0	0	0	Unassigned						D_6__uncultured bacterium
denovo2443	2	0	0	0	0	0	0	0	2	0	0	0	0	0	0	0	1	0	0	0	D_0__Bacteria	D_1__Firmicutes	D_2__Clostridia	D_3__Clostridiales	D_4__Lachnospiraceae	D_5__Lachnospiraceae NK4B4 group	D_6__uncultured bacterium
denovo2444	2	0	0	0	2	0	0	0	0	0	0	0	1	0	0	0	1	0	0	0	D_0__Bacteria	D_1__Bacteroidetes	D_2__WCHB1-32	D_3__uncultured bacterium	D_4__uncultured bacterium	D_5__uncultured bacterium	D_6__uncultured bacterium
denovo2753	2	0	0	0	0	0	0	0	0	0	0	0	0	0	0	0	0	0	0	0	D_0__Bacteria	D_1__Proteobacteria	D_2__Gammaproteobacteria	D_3__Aeromonadales	D_4__Aeromonadaceae	D_5__Aeromonas
denovo2810	2	0	0	0	1	0	0	0	1	0	1	0	1	0	0	0	1	0	0	0	D_0__Bacteria	D_1__Proteobacteria	D_2__Alphaproteobacteria	D_3__Rhodospirillales	D_4__Rhodospirillaceae	D_5__Elstera
denovo282	2	0	0	0	2	0	0	0	1	0	0	0	0	0	0	0	2	0	0	0	D_0__Bacteria	D_1__Bacteroidetes	D_2__Bacteroidia	D_3__Bacteroidales	D_4__Bacteroidaceae	D_5__Bacteroides
denovo2918	2	0	0	0	4	0	0	0	0	0	0	0	3	0	0	0	0	0	0	0	D_0__Bacteria	D_1__Proteobacteria	D_2__Gammaproteobacteria	D_3__Xanthomonadales	D_4__Xanthomonadaceae	D_5__Arenimonas	D_6__uncultured bacterium
denovo2935	2	0	0	0	2	0	0	0	1	0	0	0	1	0	0	0	0	0	0	0	D_0__Bacteria	D_1__Bacteroidetes	D_2__Sphingobacteriia	D_3__Sphingobacteriales	D_4__Saprospiraceae	D_5__uncultured	D_6__uncultured bacterium
denovo2944	2	0	0	0	8	0	1	0	0	0	0	0	3	0	0	0	0	0	0	0	D_0__Bacteria	D_1__Saccharibacteria	D_2__uncultured bacterium	D_3__uncultured bacterium	D_4__uncultured bacterium	D_5__uncultured bacterium
denovo296	2	0	0	0	4	0	0	1	3	0	0	0	7	0	0	0	5	0	0	0	D_0__Bacteria	D_1__Proteobacteria	D_2__Betaproteobacteria	D_3__Burkholderiales	D_4__Comamonadaceae
denovo2964	2	0	0	0	1	0	0	0	0	0	0	0	1	0	0	0	0	0	0	0	D_0__Bacteria	D_1__Proteobacteria	D_2__Deltaproteobacteria	D_3__Oligoflexales	D_4__uncultured bacterium	D_5__uncultured bacterium
denovo3058	2	1	0	0	2	0	1	0	3	0	0	0	1	0	0	0	2	0	0	0	D_0__Bacteria	D_1__Saccharibacteria	D_2__uncultured bacterium	D_3__uncultured bacterium	D_4__uncultured bacterium	D_5__uncultured bacterium
denovo323	2	0	0	0	1	1	0	0	3	0	0	0	2	0	0	0	1	0	0	0	D_0__Bacteria	D_1__Proteobacteria	D_2__Alphaproteobacteria	D_3__Rhizobiales	D_4__A0839		D_6__uncultured bacterium
denovo3235	2	0	0	0	0	0	0	0	0	0	0	0	0	0	0	0	0	0	0	0	D_0__Bacteria	D_1__Proteobacteria	D_2__Betaproteobacteria	D_3__Neisseriales	D_4__Neisseriaceae	D_5__Uruburuella	D_6__uncultured bacterium
denovo3238	2	0	0	0	5	0	0	0	1	0	0	0	1	0	0	0	2	0	0	0	D_0__Bacteria	D_1__Proteobacteria	D_2__Deltaproteobacteria	D_3__Oligoflexales	D_4__uncultured bacterium	D_5__uncultured bacterium	D_6__uncultured delta proteobacterium
denovo3240	2	1	0	1	0	0	0	0	0	0	0	0	0	0	0	0	0	0	0	0	D_0__Bacteria	D_1__Proteobacteria	D_2__Gammaproteobacteria	D_3__Xanthomonadales	D_4__Xanthomonadales Incertae Sedis	D_5__uncultured	D_6__uncultured bacterium
denovo3300	2	0	0	0	0	0	0	0	1	0	0	0	1	0	0	0	0	0	0	0	D_0__Bacteria	D_1__Proteobacteria	D_2__Betaproteobacteria	D_3__Rhodocyclales	D_4__Rhodocyclaceae	D_5__Zoogloea	D_6__uncultured bacterium
denovo3463	2	0	0	0	1	0	0	0	1	0	0	0	2	0	0	0	1	0	0	0	D_0__Bacteria	D_1__Firmicutes	D_2__Erysipelotrichia	D_3__Erysipelotrichales	D_4__Erysipelotrichaceae	D_5__Erysipelotrichaceae UCG-004	D_6__uncultured bacterium
denovo3487	2	0	0	0	1	0	0	0	0	0	0	0	1	0	0	0	0	0	0	0	D_0__Bacteria	D_1__Proteobacteria	D_2__Deltaproteobacteria	D_3__GR-WP33-30	D_4__uncultured delta proteobacterium	D_5__uncultured delta proteobacterium
denovo3551	2	0	0	0	0	0	0	0	1	0	0	0	0	0	0	0	0	0	0	0	D_0__Bacteria	D_1__Proteobacteria	D_2__Epsilonproteobacteria	D_3__Campylobacterales	D_4__Campylobacteraceae	D_5__Arcobacter	D_6__uncultured bacterium
denovo3848	2	0	0	0	0	0	0	0	0	0	0	0	0	0	0	0	0	0	0	0	Unassigned						D_6__uncultured bacterium
denovo3860	2	0	0	0	1	0	0	0	2	0	0	0	0	0	0	0	2	0	0	0	D_0__Bacteria	D_1__Proteobacteria	D_2__Gammaproteobacteria	D_3__Pseudomonadales	D_4__Moraxellaceae	D_5__Acinetobacter
denovo3875	2	0	0	0	0	0	0	0	3	0	0	0	3	0	0	0	4	0	0	0	Unassigned						D_6__uncultured bacterium
denovo3886	2	0	0	0	1	0	0	0	0	0	0	0	1	0	0	0	1	0	0	0	D_0__Bacteria	D_1__Bacteroidetes	D_2__Sphingobacteriia	D_3__Sphingobacteriales	D_4__Chitinophagaceae	D_5__uncultured
denovo40	2	2	0	0	5	0	0	0	2	0	0	0	0	0	0	0	3	0	0	0	D_0__Bacteria	D_1__Bacteroidetes	D_2__Flavobacteriia	D_3__Flavobacteriales	D_4__NS9 marine group	D_5__uncultured bacterium
denovo4012	2	0	0	0	2	0	0	0	1	0	0	0	0	0	0	0	1	0	0	0	D_0__Bacteria	D_1__Gracilibacteria	D_2__uncultured organism	D_3__uncultured organism	D_4__uncultured organism	D_5__uncultured organism	D_6__uncultured organism
denovo4047	2	0	0	0	1	0	0	0	1	0	0	0	3	0	0	0	3	0	0	0	D_0__Bacteria	D_1__Bacteroidetes	D_2__Bacteroidia	D_3__Bacteroidales	D_4__Bacteroidaceae	D_5__Bacteroides
denovo4106	2	0	0	0	5	0	0	0	1	0	1	0	3	0	0	0	1	0	0	0	D_0__Bacteria	D_1__Firmicutes	D_2__Clostridia	D_3__Clostridiales	D_4__Lachnospiraceae	D_5__Butyrivibrio 2	D_6__uncultured bacterium
denovo4115	2	0	0	0	0	0	0	0	0	0	0	0	0	0	0	0	0	0	0	0	D_0__Bacteria	D_1__Proteobacteria	D_2__Betaproteobacteria	D_3__Burkholderiales	D_4__Comamonadaceae
denovo4192	2	0	0	0	2	1	0	0	0	3	1	0	0	1	0	0	0	1	0	0	D_0__Bacteria	D_1__Firmicutes	D_2__Negativicutes	D_3__Selenomonadales	D_4__Acidaminococcaceae	D_5__Succiniclasticum
denovo4215	2	0	0	0	2	1	0	0	1	0	0	0	1	0	0	0	2	0	0	0	D_0__Bacteria	D_1__Proteobacteria	D_2__Betaproteobacteria	D_3__Rhodocyclales	D_4__Rhodocyclaceae
denovo4264	2	0	0	0	6	0	0	0	3	0	0	0	0	0	0	0	2	1	0	0	D_0__Bacteria	D_1__Proteobacteria	D_2__Alphaproteobacteria	D_3__Caulobacterales	D_4__Caulobacteraceae	D_5__Brevundimonas
denovo4308	2	1	4	1	4	0	0	0	7	1	0	0	2	0	3	3	6	718	1112	1447	D_0__Bacteria	D_1__Bacteroidetes	D_2__Bacteroidia	D_3__Bacteroidales	D_4__Bacteroidaceae	D_5__Bacteroides
denovo4494	2	0	0	0	0	0	0	0	0	0	0	0	0	0	0	0	0	0	0	0	D_0__Bacteria	D_1__Bacteroidetes	D_2__Flavobacteriia	D_3__Flavobacteriales	D_4__Flavobacteriaceae	D_5__Chryseobacterium	D_6__uncultured bacterium
[truncated: 6,868 more rows]

## Sheet: Table S10
Day	0	2	4	6	12	18	24	30	36	42	48	54	60	66	72	78	84	90	96	102	108	114	120	126	132	138	144	150	156	162	168	174	180	186	192	198	204	210	216	222	228	234	240	246	252	Classification with Silva database
#OTU ID	Seed.SRT6d.pH55.L001	2d.SRT6d.pH55.L001	4d.SRT6d.pH55.L001	1SRT.SRT6d.pH55.L001	2SRT.SRT6d.pH55.L001	3SRT.SRT6d.pH55.L001	4SRT.SRT6d.pH55.L001	5SRT.SRT6d.pH55.L001	6SRT.SRT6d.pH55.L001	7SRT.SRT6d.pH55.L001	8SRT.SRT6d.pH55.L001	9SRT.SRT6d.pH55.L001	10SRT.SRT6d.pH55.L001	11SRT.SRT6d.pH55.L001	12SRT.SRT6d.pH55.L001	13SRT.SRT6d.pH55.L001	14SRT.SRT6d.pH55.L001	15SRT.SRT6d.pH55.L001	16SRT.SRT6d.pH55.L001	17SRT.SRT6d.pH55.L001	18SRT.SRT6d.pH55.L001	19SRT.SRT6d.pH55.L001	20SRT.SRT6d.pH55.L001	21SRT.SRT6d.pH55.L001	22SRT.SRT6d.pH55.L001	23SRT.SRT6d.pH55.L001	24SRT.SRT6d.pH55.L001	25SRT.SRT6d.pH55.L001	26SRT.SRT6d.pH55.L001	27SRT.SRT6d.pH55.L001	28SRT.SRT6d.pH55.L001	29SRT.SRT6d.pH55.L001	30SRT.SRT6d.pH55.L001	31SRT.SRT6d.pH55.L001	32SRT.SRT6d.pH55.L001	33SRT.SRT6d.pH55.L001	34SRT.SRT6d.pH55.L001	35SRT.SRT6d.pH55.L001	36SRT.SRT6d.pH55.L001	37SRT.SRT6d.pH55.L001	38SRT.SRT6d.pH55.L001	39SRT.SRT6d.pH55.L001	40SRT.SRT6d.pH55.L001	41SRT.SRT6d.pH55.L001	42SRT.SRT6d.pH55.L001	ConsensusLineage	Kingdom	Phylum	Class
denovo13986	9587	1121	335	1	0	0	1	0	0	0	1	0	0	0	0	0	0	0	0	0	0	0	0	0	0	0	0	0	0	0	0	0	0	0	0	0	0	0	0	0	0	0	0	0	0	Unassigned	Unassigned	Unassigned	Unassigned
denovo58506	8988	196	48	21	8	1	0	0	1	0	0	0	0	0	0	0	0	0	0	0	0	0	0	0	0	0	0	0	0	0	0	0	0	0	0	0	0	0	0	0	0	0	0	0	0	D_0__Bacteria; D_1__Proteobacteria; D_2__Epsilonproteobacteria; D_3__Campylobacterales; D_4__Campylobacteraceae; D_5__Arcobacter; D_6__uncultured bacterium	D_0__Bacteria	D_1__Proteobacteria	D_2__Epsilonproteobacteria
denovo68189	5746	10006	8650	2166	179	90	34	41	5	3	1	0	0	0	0	0	0	0	0	0	0	0	0	0	0	0	0	0	0	0	0	0	0	0	0	0	0	0	0	0	0	0	0	0	0	D_0__Bacteria; D_1__Bacteroidetes; D_2__Bacteroidia; D_3__Bacteroidales; D_4__Prevotellaceae; D_5__Prevotella 1; D_6__uncultured bacterium	D_0__Bacteria	D_1__Bacteroidetes	D_2__Bacteroidia
denovo80472	4908	1135	455	204	55	16	19	6	0	0	0	0	0	0	0	0	0	0	0	0	0	0	0	0	0	0	0	0	0	0	0	0	0	0	0	0	0	0	0	0	0	0	0	0	0	D_0__Bacteria; D_1__Firmicutes; D_2__Erysipelotrichia; D_3__Erysipelotrichales; D_4__Erysipelotrichaceae; D_5__Erysipelotrichaceae UCG-004; D_6__uncultured bacterium	D_0__Bacteria	D_1__Firmicutes	D_2__Erysipelotrichia
denovo85772	3775	482	171	111	49	11	4	0	0	0	0	1	0	0	0	0	0	0	0	0	0	0	0	0	0	0	0	0	0	0	0	0	0	0	0	0	0	0	0	0	0	0	0	0	0	D_0__Bacteria; D_1__Proteobacteria; D_2__Betaproteobacteria; D_3__Burkholderiales; D_4__Comamonadaceae; D_5__Acidovorax; D_6__Acidovorax defluvii	D_0__Bacteria	D_1__Proteobacteria	D_2__Betaproteobacteria
denovo117592	3433	3330	931	763	185	37	16	12	2	0	0	0	0	0	0	0	0	0	0	0	0	0	0	0	0	0	0	0	0	0	0	0	0	0	0	0	0	0	0	0	0	0	0	0	0	D_0__Bacteria; D_1__Bacteroidetes; D_2__Bacteroidia; D_3__Bacteroidales; D_4__Rikenellaceae; D_5__U29-B03; D_6__uncultured bacterium	D_0__Bacteria	D_1__Bacteroidetes	D_2__Bacteroidia
denovo23048	2616	2	3	0	1	0	0	0	1	0	0	0	0	0	0	0	0	0	0	0	3	0	0	0	0	0	0	0	0	0	0	0	0	0	0	0	0	0	0	0	0	0	0	0	0	D_0__Bacteria; D_1__Proteobacteria; D_2__Epsilonproteobacteria; D_3__Campylobacterales; D_4__Campylobacteraceae; D_5__Arcobacter; D_6__uncultured bacterium	D_0__Bacteria	D_1__Proteobacteria	D_2__Epsilonproteobacteria
denovo103418	2230	8052	5108	4529	1259	347	31	11	1	0	1	1	0	0	0	0	0	0	0	0	0	0	0	0	0	0	0	0	0	0	0	0	0	0	0	0	0	0	0	0	0	0	0	0	0	D_0__Bacteria; D_1__Bacteroidetes; D_2__Bacteroidia; D_3__Bacteroidales; D_4__Rikenellaceae; D_5__Rikenellaceae RC9 gut group; D_6__uncultured bacterium	D_0__Bacteria	D_1__Bacteroidetes	D_2__Bacteroidia
denovo56143	2176	3432	2785	1569	411	100	43	37	11	0	0	0	0	0	0	0	0	0	0	0	0	0	0	0	0	0	0	0	0	0	0	0	0	0	0	0	0	0	0	0	0	0	0	0	0	D_0__Bacteria; D_1__Firmicutes; D_2__Negativicutes; D_3__Selenomonadales; D_4__Acidaminococcaceae; D_5__Succiniclasticum; D_6__uncultured bacterium	D_0__Bacteria	D_1__Firmicutes	D_2__Negativicutes
denovo117846	2140	140	58	49	15	1	0	0	0	0	0	0	0	0	0	0	0	0	0	0	0	0	0	0	0	0	0	0	0	0	0	0	0	0	0	0	0	0	0	0	0	0	0	0	0	D_0__Bacteria; D_1__Bacteroidetes; D_2__Bacteroidia; D_3__Bacteroidales; D_4__Porphyromonadaceae; D_5__Macellibacteroides; D_6__uncultured bacterium	D_0__Bacteria	D_1__Bacteroidetes	D_2__Bacteroidia
denovo96801	2113	180	56	63	15	3	0	0	0	0	0	0	0	0	0	0	0	0	0	0	0	0	0	0	0	0	0	0	0	0	0	0	0	0	0	0	0	0	0	0	0	0	0	0	0	D_0__Bacteria; D_1__Bacteroidetes; D_2__Flavobacteriia; D_3__Flavobacteriales; D_4__Flavobacteriaceae; D_5__Cloacibacterium; D_6__uncultured bacterium	D_0__Bacteria	D_1__Bacteroidetes	D_2__Flavobacteriia
denovo13009	1838	127	21	22	0	0	0	0	1	0	0	0	0	0	0	0	0	0	0	0	0	0	0	0	0	0	0	0	0	0	0	0	0	0	0	0	0	0	0	0	0	0	0	0	0	D_0__Bacteria; D_1__Bacteroidetes; D_2__Sphingobacteriia; D_3__Sphingobacteriales; D_4__Chitinophagaceae; D_5__Sediminibacterium; D_6__uncultured bacterium	D_0__Bacteria	D_1__Bacteroidetes	D_2__Sphingobacteriia
denovo36436	1730	175	86	43	16	1	0	0	0	0	0	0	0	0	0	0	0	0	0	0	0	0	0	0	0	0	0	0	0	0	0	0	0	0	0	0	0	0	0	0	0	0	0	0	0	D_0__Bacteria; D_1__Proteobacteria; D_2__Betaproteobacteria; D_3__Rhodocyclales; D_4__Rhodocyclaceae; D_5__Dechloromonas	D_0__Bacteria	D_1__Proteobacteria	D_2__Betaproteobacteria
denovo54255	1511	218	120	80	29	7	10	0	0	0	0	0	0	0	0	0	0	0	0	0	0	0	0	0	0	0	0	0	0	0	0	0	0	0	0	0	0	0	0	0	0	0	0	0	0	D_0__Bacteria; D_1__Proteobacteria; D_2__Betaproteobacteria; D_3__Neisseriales; D_4__Neisseriaceae; D_5__Uruburuella; D_6__uncultured bacterium	D_0__Bacteria	D_1__Proteobacteria	D_2__Betaproteobacteria
denovo36423	1476	29	12	14	3	0	0	0	0	0	0	0	0	0	0	0	0	0	0	0	0	0	0	0	0	0	0	0	0	0	0	0	0	0	0	0	0	0	0	0	0	0	0	0	0	D_0__Bacteria; D_1__Proteobacteria; D_2__Gammaproteobacteria; D_3__Pseudomonadales; D_4__Moraxellaceae; D_5__Acinetobacter; D_6__uncultured Acinetobacter sp.	D_0__Bacteria	D_1__Proteobacteria	D_2__Gammaproteobacteria
denovo93420	1451	19	7	2	1	0	0	0	0	0	0	0	0	0	0	0	0	0	0	0	0	0	0	0	0	0	0	0	0	0	0	0	0	0	0	0	0	0	0	0	0	0	0	0	0	D_0__Bacteria; D_1__Bacteroidetes; D_2__Bacteroidia; D_3__Bacteroidales; D_4__Bacteroidaceae; D_5__Bacteroides; D_6__uncultured bacterium	D_0__Bacteria	D_1__Bacteroidetes	D_2__Bacteroidia
denovo907	1391	123	35	25	6	0	0	0	0	0	0	1	0	0	0	0	0	0	0	0	0	0	0	0	0	0	0	0	0	0	0	0	0	0	0	0	0	0	0	0	0	0	0	0	0	D_0__Bacteria; D_1__Bacteroidetes; D_2__Sphingobacteriia; D_3__Sphingobacteriales; D_4__Saprospiraceae; D_5__uncultured	D_0__Bacteria	D_1__Bacteroidetes	D_2__Sphingobacteriia
denovo2137	1388	4127	2437	1032	123	22	4	3	0	0	0	0	0	0	0	0	0	0	0	0	0	0	0	0	0	0	0	0	0	0	0	0	0	0	0	0	0	0	0	0	0	0	0	0	0	D_0__Bacteria; D_1__Bacteroidetes; D_2__Bacteroidia; D_3__Bacteroidales; D_4__Prevotellaceae; D_5__Prevotella 1; D_6__uncultured bacterium	D_0__Bacteria	D_1__Bacteroidetes	D_2__Bacteroidia
denovo113953	1254	315	194	220	42	15	5	5	1	0	0	0	0	0	0	0	0	0	0	0	0	0	0	0	0	0	0	0	0	0	0	0	0	0	0	0	0	0	0	0	0	0	0	0	0	D_0__Bacteria; D_1__Firmicutes; D_2__Erysipelotrichia; D_3__Erysipelotrichales; D_4__Erysipelotrichaceae; D_5__Erysipelotrichaceae UCG-004; D_6__uncultured bacterium	D_0__Bacteria	D_1__Firmicutes	D_2__Erysipelotrichia
denovo10138	1044	6225	5813	2863	1487	328	125	80	8	5	0	1	0	0	0	0	0	0	0	0	0	0	0	0	0	0	0	0	0	0	0	0	0	0	0	0	0	0	0	0	0	0	0	0	0	D_0__Bacteria; D_1__Firmicutes; D_2__Negativicutes; D_3__Selenomonadales; D_4__Acidaminococcaceae; D_5__Succiniclasticum; D_6__uncultured bacterium	D_0__Bacteria	D_1__Firmicutes	D_2__Negativicutes
denovo22658	1030	1592	182	42	5	1	1	0	0	0	0	0	0	0	0	0	0	0	0	0	0	0	0	0	0	0	0	0	0	0	0	0	0	0	0	0	0	0	0	0	0	0	0	0	0	D_0__Bacteria; D_1__Bacteroidetes; D_2__Bacteroidia; D_3__Bacteroidales; D_4__Prevotellaceae; D_5__Prevotella 1; D_6__uncultured bacterium	D_0__Bacteria	D_1__Bacteroidetes	D_2__Bacteroidia
denovo54892	997	251	137	94	35	23	8	3	2	0	0	0	0	0	0	0	0	0	0	0	0	0	0	0	0	0	0	0	0	0	0	0	0	0	0	0	0	0	0	0	0	0	0	0	0	D_0__Bacteria; D_1__Proteobacteria; D_2__Gammaproteobacteria; D_3__Xanthomonadales; D_4__Xanthomonadaceae; D_5__Dokdonella; D_6__uncultured bacterium	D_0__Bacteria	D_1__Proteobacteria	D_2__Gammaproteobacteria
denovo108482	994	64	16	12	3	0	0	0	0	0	0	0	0	0	0	0	0	0	0	0	0	0	0	0	0	0	0	0	0	0	0	0	0	0	0	0	0	0	0	0	0	0	0	0	0	D_0__Bacteria; D_1__Bacteroidetes; D_2__Sphingobacteriia; D_3__Sphingobacteriales; D_4__Saprospiraceae; D_5__uncultured; D_6__uncultured Saprospiraceae bacterium	D_0__Bacteria	D_1__Bacteroidetes	D_2__Sphingobacteriia
denovo77791	956	123	2	2	1	0	0	0	0	0	0	0	0	0	0	0	0	0	0	0	0	0	0	0	0	0	0	0	0	0	0	0	0	0	0	0	0	0	0	0	0	0	0	0	0	D_0__Bacteria; D_1__Bacteroidetes; D_2__Bacteroidia; D_3__Bacteroidales; D_4__Prevotellaceae; D_5__Prevotella 9; D_6__uncultured bacterium	D_0__Bacteria	D_1__Bacteroidetes	D_2__Bacteroidia
denovo54034	955	216	83	50	1	0	0	0	1	0	0	0	0	0	0	0	0	0	0	0	0	0	0	0	0	0	0	0	0	0	0	0	0	0	0	0	0	0	0	0	0	0	0	0	0	D_0__Bacteria; D_1__Firmicutes; D_2__Clostridia; D_3__Clostridiales; D_4__Clostridiaceae 1	D_0__Bacteria	D_1__Firmicutes	D_2__Clostridia
denovo536	911	233	168	186	35	11	1	7	1	1	0	0	0	0	0	0	0	0	0	0	0	0	0	0	0	0	0	0	0	0	0	0	0	0	0	0	0	0	0	0	0	0	0	0	0	Unassigned	Unassigned	Unassigned	Unassigned
denovo76793	894	1551	1406	1503	550	156	37	16	3	0	0	0	0	0	0	0	0	0	0	0	0	0	0	0	0	0	0	0	0	0	0	0	0	0	0	0	0	0	0	0	0	0	0	0	0	D_0__Bacteria; D_1__Bacteroidetes; D_2__Bacteroidia; D_3__Bacteroidales; D_4__Bacteroidales S24-7 group; D_5__uncultured bacterium; D_6__uncultured bacterium	D_0__Bacteria	D_1__Bacteroidetes	D_2__Bacteroidia
denovo66636	863	96	44	15	5	2	1	0	0	0	0	0	0	0	0	0	0	0	0	0	0	0	0	0	0	0	0	0	0	0	0	0	0	0	0	0	0	0	0	0	0	0	0	0	0	D_0__Bacteria; D_1__Proteobacteria; D_2__Betaproteobacteria; D_3__Burkholderiales; D_4__Comamonadaceae	D_0__Bacteria	D_1__Proteobacteria	D_2__Betaproteobacteria
denovo76721	836	41	12	4	1	2	1	0	0	0	0	0	0	0	0	0	0	0	0	0	0	0	0	0	0	0	0	0	0	0	0	0	0	0	0	0	0	0	0	0	0	0	0	0	0	D_0__Bacteria; D_1__Proteobacteria; D_2__Betaproteobacteria; D_3__Burkholderiales; D_4__Comamonadaceae; D_5__Hydrogenophaga; D_6__uncultured bacterium	D_0__Bacteria	D_1__Proteobacteria	D_2__Betaproteobacteria
denovo30565	814	6875	6670	3335	2915	10	4	3	1	0	0	0	0	0	0	0	0	0	0	0	0	0	0	0	0	0	0	0	0	0	0	0	0	0	0	0	0	0	0	0	0	0	0	0	0	D_0__Bacteria; D_1__Bacteroidetes; D_2__Bacteroidia; D_3__Bacteroidales; D_4__Prevotellaceae; D_5__Prevotella 7; D_6__uncultured bacterium	D_0__Bacteria	D_1__Bacteroidetes	D_2__Bacteroidia
denovo105393	795	337	219	199	98	24	24	4	2	3	0	0	0	0	0	0	0	0	0	0	0	0	0	0	0	0	0	0	0	0	0	0	0	0	0	0	0	0	0	0	0	0	0	0	0	D_0__Bacteria; D_1__Proteobacteria; D_2__Gammaproteobacteria; D_3__Xanthomonadales; D_4__Xanthomonadaceae; D_5__Aquimonas	D_0__Bacteria	D_1__Proteobacteria	D_2__Gammaproteobacteria
denovo98920	777	354	126	117	2	1	0	0	0	0	0	0	0	0	0	0	0	0	0	0	0	0	0	0	0	0	0	0	0	0	0	0	0	0	0	0	0	0	0	0	0	0	0	0	0	D_0__Bacteria; D_1__Firmicutes; D_2__Clostridia; D_3__Clostridiales; D_4__Clostridiaceae 1; D_5__Caloramator; D_6__uncultured bacterium	D_0__Bacteria	D_1__Firmicutes	D_2__Clostridia
denovo35985	706	71	11	0	0	0	0	0	0	0	0	0	0	0	0	0	0	0	0	0	0	0	0	0	0	0	0	0	0	0	0	0	0	0	0	0	0	0	0	0	0	0	0	0	0	Unassigned	Unassigned	Unassigned	Unassigned
denovo25785	683	22	13	7	1	0	0	0	0	0	0	0	0	0	0	0	0	0	0	0	0	0	0	0	0	0	0	0	0	0	0	0	0	0	0	0	0	0	0	0	0	0	0	0	0	D_0__Bacteria; D_1__Proteobacteria; D_2__Gammaproteobacteria; D_3__Aeromonadales; D_4__Aeromonadaceae; D_5__Aeromonas	D_0__Bacteria	D_1__Proteobacteria	D_2__Gammaproteobacteria
denovo112074	628	111	61	28	19	9	8	2	0	0	0	0	0	0	0	0	0	0	0	0	0	0	0	0	0	0	0	0	0	0	0	0	0	0	0	0	0	0	0	0	0	0	0	0	0	D_0__Bacteria; D_1__Cyanobacteria; D_2__Melainabacteria; D_3__Obscuribacterales; D_4__uncultured bacterium; D_5__uncultured bacterium; D_6__uncultured bacterium	D_0__Bacteria	D_1__Cyanobacteria	D_2__Melainabacteria
denovo89952	604	76	11	8	1	0	0	0	0	0	0	0	0	0	0	0	0	0	0	0	1	0	0	0	0	0	0	0	0	0	0	0	0	0	0	0	0	0	0	0	0	0	0	0	0	D_0__Bacteria; D_1__Firmicutes; D_2__Bacilli; D_3__Lactobacillales; D_4__Carnobacteriaceae; D_5__Trichococcus; D_6__uncultured bacterium	D_0__Bacteria	D_1__Firmicutes	D_2__Bacilli
denovo1819	598	90	46	0	0	0	0	0	0	0	0	0	0	0	0	0	0	0	0	0	0	0	0	0	0	0	0	0	0	0	0	0	0	0	0	0	0	0	0	0	0	0	0	0	0	Unassigned	Unassigned	Unassigned	Unassigned
denovo89163	595	93	63	29	18	1	0	0	0	0	0	0	0	0	0	0	0	0	0	0	0	0	0	0	0	0	0	0	0	0	0	0	0	0	0	0	0	0	0	0	0	0	0	0	0	D_0__Bacteria; D_1__Proteobacteria; D_2__Betaproteobacteria; D_3__Burkholderiales; D_4__Comamonadaceae; D_5__Aquabacterium; D_6__uncultured bacterium	D_0__Bacteria	D_1__Proteobacteria	D_2__Betaproteobacteria
denovo106690	595	2971	2247	2497	882	292	56	22	1	1	0	0	0	0	0	0	0	0	0	0	0	0	0	0	0	0	0	0	0	0	0	0	0	0	0	0	0	0	0	0	0	0	0	0	0	D_0__Bacteria; D_1__Bacteroidetes; D_2__Bacteroidia; D_3__Bacteroidales; D_4__Porphyromonadaceae; D_5__Parabacteroides; D_6__uncultured bacterium	D_0__Bacteria	D_1__Bacteroidetes	D_2__Bacteroidia
denovo113750	585	49	31	10	1	0	0	0	1	0	0	0	0	0	0	0	0	0	0	0	0	0	0	2	0	0	0	0	0	0	0	0	0	0	0	0	0	0	0	0	0	0	0	0	0	D_0__Bacteria; D_1__Bacteroidetes; D_2__Cytophagia; D_3__Cytophagales; D_4__Cytophagaceae; D_5__uncultured; D_6__uncultured bacterium	D_0__Bacteria	D_1__Bacteroidetes	D_2__Cytophagia
denovo78592	575	197	83	61	16	11	1	1	1	0	0	0	0	0	0	0	0	0	0	0	0	0	0	0	0	0	0	0	0	0	0	0	0	0	0	0	0	0	0	0	0	0	0	0	0	Unassigned	Unassigned	Unassigned	Unassigned
denovo28128	562	1179	931	397	29	9	0	1	0	0	1	0	0	0	0	0	0	0	0	0	0	0	0	0	0	0	0	0	0	0	0	0	0	0	0	0	0	0	0	0	0	0	0	0	0	D_0__Bacteria; D_1__Bacteroidetes; D_2__Bacteroidia; D_3__Bacteroidales; D_4__uncultured; D_5__uncultured bacterium; D_6__uncultured bacterium	D_0__Bacteria	D_1__Bacteroidetes	D_2__Bacteroidia
denovo117503	560	146	49	32	23	6	4	0	0	0	0	0	0	0	0	0	0	0	0	0	0	0	0	0	0	0	0	0	0	0	0	0	0	0	0	0	0	0	0	0	0	0	0	0	0	D_0__Bacteria; D_1__Proteobacteria; D_2__Betaproteobacteria; D_3__Neisseriales; D_4__Neisseriaceae; D_5__Vitreoscilla; D_6__uncultured bacterium	D_0__Bacteria	D_1__Proteobacteria	D_2__Betaproteobacteria
denovo88922	551	70	38	20	9	0	0	0	0	0	0	0	0	0	0	0	0	0	0	0	0	0	0	0	0	0	0	0	0	0	0	0	0	0	0	0	0	0	0	0	0	0	0	0	0	D_0__Bacteria; D_1__Proteobacteria; D_2__Betaproteobacteria; D_3__Burkholderiales; D_4__Comamonadaceae; D_5__Inhella	D_0__Bacteria	D_1__Proteobacteria	D_2__Betaproteobacteria
denovo35813	543	86	42	42	19	0	0	1	0	0	0	0	0	0	0	0	0	0	0	0	0	0	0	0	0	0	0	0	0	0	0	0	0	0	0	0	0	0	0	0	0	0	0	0	0	D_0__Bacteria; D_1__Proteobacteria; D_2__Betaproteobacteria; D_3__Burkholderiales; D_4__Comamonadaceae; D_5__uncultured; D_6__uncultured bacterium	D_0__Bacteria	D_1__Proteobacteria	D_2__Betaproteobacteria
denovo45812	521	51	19	26	4	0	0	0	0	0	0	0	0	0	0	0	0	0	0	0	0	0	0	0	0	0	0	0	0	0	0	0	0	0	0	0	0	0	0	0	0	0	0	0	0	D_0__Bacteria; D_1__Bacteroidetes; D_2__Bacteroidia; D_3__Bacteroidales; D_4__Porphyromonadaceae; D_5__Macellibacteroides	D_0__Bacteria	D_1__Bacteroidetes	D_2__Bacteroidia
denovo50866	516	888	308	104	14	4	0	0	0	0	0	0	0	0	0	0	0	0	0	0	0	0	0	0	0	0	0	0	0	0	0	0	0	0	0	0	0	0	0	0	0	0	0	0	0	D_0__Bacteria; D_1__Bacteroidetes; D_2__Bacteroidia; D_3__Bacteroidales; D_4__Prevotellaceae; D_5__Prevotella 1; D_6__uncultured bacterium	D_0__Bacteria	D_1__Bacteroidetes	D_2__Bacteroidia
denovo68212	509	33	6	6	0	0	0	0	0	0	0	0	0	0	0	0	0	0	0	0	0	0	0	0	0	0	0	0	0	0	0	0	0	0	0	0	0	0	0	0	0	0	0	0	0	D_0__Bacteria; D_1__Bacteroidetes; D_2__Cytophagia; D_3__Cytophagales; D_4__Cytophagaceae; D_5__uncultured; D_6__uncultured bacterium	D_0__Bacteria	D_1__Bacteroidetes	D_2__Cytophagia
denovo85448	508	228	161	144	69	23	17	15	2	0	0	0	0	0	0	0	0	0	0	0	1	1	0	0	0	0	0	0	0	0	0	0	0	0	0	0	0	0	0	0	0	0	0	0	0	D_0__Bacteria; D_1__Proteobacteria; D_2__Gammaproteobacteria; D_3__Xanthomonadales; D_4__Xanthomonadaceae; D_5__Thermomonas; D_6__uncultured bacterium	D_0__Bacteria	D_1__Proteobacteria	D_2__Gammaproteobacteria
denovo74301	504	58	34	23	8	0	0	2	0	0	0	0	0	0	0	0	0	0	0	0	0	0	0	0	0	0	0	0	0	0	0	0	0	0	0	0	0	0	0	0	0	0	0	0	0	D_0__Bacteria; D_1__Proteobacteria; D_2__Betaproteobacteria; D_3__Burkholderiales; D_4__Comamonadaceae; D_5__Simplicispira; D_6__uncultured bacterium	D_0__Bacteria	D_1__Proteobacteria	D_2__Betaproteobacteria
denovo82992	468	1	0	1	0	0	0	0	0	0	0	0	0	0	0	0	0	0	0	0	0	0	0	0	0	0	0	0	0	0	0	0	0	0	0	0	0	0	0	0	0	0	0	0	0	D_0__Bacteria; D_1__Fusobacteria; D_2__Fusobacteriia; D_3__Fusobacteriales; D_4__Leptotrichiaceae; D_5__uncultured; D_6__uncultured bacterium	D_0__Bacteria	D_1__Fusobacteria	D_2__Fusobacteriia
denovo63415	441	8	1	1	0	0	0	0	0	0	0	0	0	0	0	0	0	0	0	0	0	0	0	0	0	0	0	0	0	0	0	0	0	0	0	0	0	0	0	0	0	0	0	0	0	D_0__Bacteria; D_1__Bacteroidetes; D_2__Sphingobacteriia; D_3__Sphingobacteriales; D_4__Chitinophagaceae; D_5__Hydrotalea	D_0__Bacteria	D_1__Bacteroidetes	D_2__Sphingobacteriia
denovo65690	440	257	247	260	37	9	7	0	0	0	0	0	0	0	0	0	0	0	0	0	0	0	0	0	0	0	0	0	0	0	0	0	0	0	0	0	0	0	0	0	0	0	0	0	0	D_0__Bacteria; D_1__Firmicutes; D_2__Erysipelotrichia; D_3__Erysipelotrichales; D_4__Erysipelotrichaceae; D_5__Erysipelotrichaceae UCG-004; D_6__uncultured bacterium	D_0__Bacteria	D_1__Firmicutes	D_2__Erysipelotrichia
denovo32353	436	3	0	0	0	0	0	0	0	0	0	0	0	0	0	0	0	0	0	0	0	0	0	0	0	0	0	0	0	0	0	0	0	0	0	0	0	0	0	0	0	0	0	0	0	D_0__Bacteria; D_1__Bacteroidetes; D_2__Sphingobacteriia; D_3__Sphingobacteriales; D_4__Chitinophagaceae; D_5__uncultured; D_6__uncultured bacterium	D_0__Bacteria	D_1__Bacteroidetes	D_2__Sphingobacteriia
denovo88251	427	34	14	6	0	1	0	0	0	1	0	0	0	0	0	0	0	0	0	0	0	0	0	0	0	0	0	0	0	0	0	1	0	1	1	1	0	0	0	0	0	0	0	0	0	D_0__Bacteria; D_1__Proteobacteria; D_2__Gammaproteobacteria; D_3__Enterobacteriales; D_4__Enterobacteriaceae	D_0__Bacteria	D_1__Proteobacteria	D_2__Gammaproteobacteria
denovo100120	416	0	0	0	1	0	0	0	0	0	0	0	0	0	0	0	0	0	0	0	0	0	0	0	0	0	0	0	0	0	0	0	0	0	0	0	0	0	0	0	0	0	0	0	0	D_0__Bacteria; D_1__Bacteroidetes; D_2__Bacteroidia; D_3__Bacteroidales; D_4__Porphyromonadaceae; D_5__Paludibacter; D_6__uncultured bacterium	D_0__Bacteria	D_1__Bacteroidetes	D_2__Bacteroidia
denovo34100	409	53	16	0	0	0	0	1	0	0	0	0	0	0	0	0	0	0	0	0	0	0	0	0	0	0	0	0	0	0	0	0	0	0	0	0	0	0	0	0	0	0	0	0	0	Unassigned	Unassigned	Unassigned	Unassigned
denovo96177	409	86	78	85	47	4	0	0	0	0	0	0	0	0	0	0	0	0	0	0	0	0	0	0	0	0	0	0	0	0	0	0	0	0	0	0	0	0	0	0	0	0	0	0	0	D_0__Bacteria; D_1__Firmicutes; D_2__Clostridia; D_3__Clostridiales; D_4__Ruminococcaceae; D_5__Ruminococcaceae NK4A214 group; D_6__uncultured bacterium	D_0__Bacteria	D_1__Firmicutes	D_2__Clostridia
denovo267	396	16264	18395	11838	14499	36	12	19	7	2	0	4	0	0	0	0	0	0	0	0	0	0	0	0	0	0	0	0	0	0	0	0	0	0	0	0	0	0	0	0	0	0	0	0	0	D_0__Bacteria; D_1__Bacteroidetes; D_2__Bacteroidia; D_3__Bacteroidales; D_4__Prevotellaceae; D_5__Prevotella 7; D_6__uncultured bacterium	D_0__Bacteria	D_1__Bacteroidetes	D_2__Bacteroidia
denovo57693	371	36	15	8	9	0	0	0	0	0	0	0	0	0	0	0	0	0	0	0	0	0	0	0	0	0	0	0	0	0	0	0	0	0	0	0	0	0	0	0	0	0	0	0	0	D_0__Bacteria; D_1__Proteobacteria; D_2__Betaproteobacteria; D_3__Burkholderiales; D_4__Comamonadaceae; D_5__Comamonas	D_0__Bacteria	D_1__Proteobacteria	D_2__Betaproteobacteria
denovo11415	370	3522	5268	6529	862	30	1	2	4	2	1	0	0	0	0	0	0	0	0	0	0	0	0	0	0	0	0	0	0	0	0	0	0	0	0	0	0	0	0	0	0	0	0	0	0	D_0__Bacteria; D_1__Bacteroidetes; D_2__Bacteroidia; D_3__Bacteroidales; D_4__Prevotellaceae; D_5__Prevotella 9	D_0__Bacteria	D_1__Bacteroidetes	D_2__Bacteroidia
denovo18045	355	95	39	60	7	5	4	0	0	0	0	0	0	0	0	0	0	0	0	0	0	0	0	0	0	0	0	0	0	0	0	0	0	0	0	0	0	0	0	0	0	0	0	0	0	D_0__Bacteria; D_1__Firmicutes; D_2__Erysipelotrichia; D_3__Erysipelotrichales; D_4__Erysipelotrichaceae; D_5__Erysipelotrichaceae UCG-004; D_6__uncultured bacterium	D_0__Bacteria	D_1__Firmicutes	D_2__Erysipelotrichia
denovo35669	351	53	21	9	6	1	0	0	0	0	0	0	0	0	0	0	0	0	0	0	0	0	0	0	0	0	0	0	0	0	0	0	0	0	0	0	0	0	0	0	0	0	0	0	0	D_0__Bacteria; D_1__Proteobacteria; D_2__Betaproteobacteria; D_3__Rhodocyclales; D_4__Rhodocyclaceae; D_5__Propionivibrio; D_6__uncultured bacterium	D_0__Bacteria	D_1__Proteobacteria	D_2__Betaproteobacteria
denovo93431	344	30	6	6	5	0	0	0	0	0	0	0	0	0	0	0	0	0	0	0	0	0	0	0	0	0	0	0	0	0	0	0	0	0	0	0	0	0	0	0	0	0	0	0	0	D_0__Bacteria; D_1__Proteobacteria; D_2__Deltaproteobacteria; D_3__Desulfovibrionales; D_4__Desulfomicrobiaceae; D_5__Desulfomicrobium	D_0__Bacteria	D_1__Proteobacteria	D_2__Deltaproteobacteria
denovo103931	335	10	6	1	0	0	0	0	0	0	0	0	0	0	0	0	0	0	0	0	0	0	0	0	0	0	0	0	0	0	0	0	0	0	0	0	0	0	0	0	0	0	0	0	0	D_0__Bacteria; D_1__Chloroflexi; D_2__Caldilineae; D_3__Caldilineales; D_4__Caldilineaceae; D_5__uncultured; D_6__uncultured bacterium	D_0__Bacteria	D_1__Chloroflexi	D_2__Caldilineae
denovo72388	333	1357	714	19	1	0	1	0	0	0	0	0	0	0	0	0	0	0	0	0	0	0	0	0	0	0	0	0	0	0	0	0	0	0	0	0	0	0	0	0	0	0	0	0	0	D_0__Bacteria; D_1__Bacteroidetes; D_2__Bacteroidia; D_3__Bacteroidales; D_4__Prevotellaceae; D_5__Prevotella 1; D_6__uncultured bacterium	D_0__Bacteria	D_1__Bacteroidetes	D_2__Bacteroidia
denovo66867	331	814	1757	2096	285	77	6	1	0	0	0	0	0	0	0	0	0	0	0	0	0	0	0	0	0	0	0	0	0	0	0	0	0	0	0	0	0	0	0	0	0	0	0	0	0	D_0__Bacteria; D_1__Firmicutes; D_2__Clostridia; D_3__Clostridiales; D_4__Ruminococcaceae; D_5__Ruminococcaceae NK4A214 group; D_6__uncultured bacterium	D_0__Bacteria	D_1__Firmicutes	D_2__Clostridia
denovo78827	312	305	52	23	5	3	1	2	0	0	0	0	0	0	0	0	0	0	0	0	0	0	0	0	0	0	0	0	0	0	0	0	0	0	0	0	0	0	0	0	0	0	0	0	0	D_0__Bacteria; D_1__Bacteroidetes; D_2__Bacteroidia; D_3__Bacteroidales; D_4__Rikenellaceae; D_5__U29-B03; D_6__uncultured bacterium	D_0__Bacteria	D_1__Bacteroidetes	D_2__Bacteroidia
denovo114869	307	3664	4157	2317	9	5	2	5	0	0	0	0	0	0	0	0	0	0	0	0	0	0	0	0	0	0	0	0	0	0	0	0	0	0	0	0	0	0	0	0	0	0	0	0	0	D_0__Bacteria; D_1__Bacteroidetes; D_2__Bacteroidia; D_3__Bacteroidales; D_4__Prevotellaceae; D_5__uncultured; D_6__uncultured bacterium	D_0__Bacteria	D_1__Bacteroidetes	D_2__Bacteroidia
denovo603	303	79	48	40	8	1	0	0	0	0	0	0	0	0	1	0	0	0	0	0	0	0	0	0	0	0	0	0	0	0	0	0	0	0	0	0	0	0	0	0	0	0	0	0	0	D_0__Bacteria; D_1__Proteobacteria; D_2__Betaproteobacteria; D_3__Rhodocyclales; D_4__Rhodocyclaceae; D_5__Candidatus Accumulibacter; D_6__uncultured bacterium	D_0__Bacteria	D_1__Proteobacteria	D_2__Betaproteobacteria
denovo78282	301	17	5	6	1	0	0	1	0	0	0	0	0	0	0	0	0	0	0	0	0	0	0	0	0	0	0	0	0	0	0	0	0	0	0	0	0	0	0	0	0	0	0	0	0	D_0__Bacteria; D_1__Proteobacteria; D_2__Betaproteobacteria; D_3__Burkholderiales; D_4__Comamonadaceae; D_5__Albidiferax; D_6__uncultured bacterium	D_0__Bacteria	D_1__Proteobacteria	D_2__Betaproteobacteria
denovo4844	298	23	7	10	4	0	1	0	0	0	0	0	0	0	0	0	0	0	0	0	0	0	0	0	0	0	0	0	0	0	0	0	0	0	0	0	0	0	0	0	0	0	0	0	0	D_0__Bacteria; D_1__Proteobacteria; D_2__Epsilonproteobacteria; D_3__Campylobacterales; D_4__Campylobacteraceae; D_5__Sulfurospirillum; D_6__uncultured bacterium	D_0__Bacteria	D_1__Proteobacteria	D_2__Epsilonproteobacteria
denovo66363	296	382	286	226	11	2	0	0	0	1	0	0	0	0	0	0	0	0	0	0	0	0	0	0	0	0	0	0	0	0	0	0	0	0	0	0	0	0	0	0	0	0	0	0	0	D_0__Bacteria; D_1__Firmicutes; D_2__Clostridia; D_3__Clostridiales; D_4__Ruminococcaceae; D_5__Oscillibacter; D_6__uncultured bacterium	D_0__Bacteria	D_1__Firmicutes	D_2__Clostridia
denovo75626	295	25	7	2	2	0	0	0	0	0	0	0	0	0	0	0	0	0	0	0	0	0	0	0	0	0	0	0	0	0	0	0	0	0	0	0	0	0	0	0	0	0	0	0	0	D_0__Bacteria; D_1__Bacteroidetes; D_2__Flavobacteriia; D_3__Flavobacteriales; D_4__Flavobacteriaceae; D_5__Flavobacterium	D_0__Bacteria	D_1__Bacteroidetes	D_2__Flavobacteriia
denovo101929	293	244	166	156	55	9	1	1	0	1	0	0	0	0	0	0	0	0	0	0	0	0	0	0	0	0	0	0	0	0	0	0	0	0	0	0	0	0	0	0	0	0	0	0	0	D_0__Bacteria; D_1__Firmicutes; D_2__Clostridia; D_3__Clostridiales; D_4__Ruminococcaceae; D_5__Ruminiclostridium	D_0__Bacteria	D_1__Firmicutes	D_2__Clostridia
denovo80919	292	1400	1181	289	50	20	6	5	1	0	0	0	0	0	0	0	0	0	0	0	0	0	0	0	0	0	0	0	0	0	0	0	0	0	0	0	0	0	0	0	0	0	0	0	0	D_0__Bacteria; D_1__Bacteroidetes; D_2__Bacteroidia; D_3__Bacteroidales; D_4__Prevotellaceae; D_5__Prevotellaceae UCG-004; D_6__uncultured bacterium	D_0__Bacteria	D_1__Bacteroidetes	D_2__Bacteroidia
denovo88145	290	610	1615	3778	1992	597	222	140	19	5	1	0	0	0	0	0	0	0	0	0	0	0	0	0	0	0	0	0	0	0	0	0	0	0	0	0	0	0	0	0	0	0	0	0	0	D_0__Bacteria; D_1__Firmicutes; D_2__Clostridia; D_3__Clostridiales; D_4__Lachnospiraceae; D_5__Lachnospiraceae NK3A20 group; D_6__uncultured bacterium	D_0__Bacteria	D_1__Firmicutes	D_2__Clostridia
denovo96250	284	58	33	17	3	3	0	0	0	0	0	2	0	0	0	0	0	0	0	0	0	0	0	0	0	0	0	0	0	0	0	0	0	0	0	0	0	0	0	0	0	0	0	0	0	D_0__Bacteria; D_1__Proteobacteria; D_2__Alphaproteobacteria; D_3__DB1-14	D_0__Bacteria	D_1__Proteobacteria	D_2__Alphaproteobacteria
denovo58674	277	79	37	51	22	3	2	4	2	0	0	0	0	0	0	0	0	0	0	0	0	0	0	0	0	0	0	0	0	0	0	0	0	0	0	0	0	0	0	0	0	0	0	0	0	D_0__Bacteria; D_1__Fusobacteria; D_2__Fusobacteriia; D_3__Fusobacteriales; D_4__Leptotrichiaceae; D_5__Leptotrichia; D_6__uncultured bacterium	D_0__Bacteria	D_1__Fusobacteria	D_2__Fusobacteriia
denovo91638	275	29	16	1	4	0	0	0	0	0	0	0	0	0	0	0	0	0	0	0	0	0	0	0	0	0	0	0	0	0	0	0	0	0	0	0	0	0	0	0	0	0	0	0	0	D_0__Bacteria; D_1__Proteobacteria; D_2__Alphaproteobacteria; D_3__Caulobacterales; D_4__Hyphomonadaceae; D_5__Hirschia; D_6__uncultured bacterium	D_0__Bacteria	D_1__Proteobacteria	D_2__Alphaproteobacteria
denovo62607	270	1576	967	526	55	7	0	0	0	0	0	0	0	0	0	0	0	0	0	0	0	0	0	0	0	0	0	0	0	0	0	0	0	0	0	0	0	0	0	0	0	0	0	0	0	D_0__Bacteria; D_1__Bacteroidetes; D_2__Bacteroidia; D_3__Bacteroidales; D_4__Bacteroidales S24-7 group; D_5__uncultured bacterium; D_6__uncultured bacterium	D_0__Bacteria	D_1__Bacteroidetes	D_2__Bacteroidia
denovo74379	270	1	1	1	0	0	0	0	0	0	0	0	0	0	0	0	0	0	0	0	1	0	0	0	0	0	0	0	0	0	0	0	0	0	0	0	0	0	0	0	0	0	0	0	0	D_0__Bacteria; D_1__Chloroflexi; D_2__uncultured; D_3__uncultured bacterium; D_4__uncultured bacterium; D_5__uncultured bacterium; D_6__uncultured bacterium	D_0__Bacteria	D_1__Chloroflexi	D_2__uncultured
denovo10763	265	38	15	13	2	5	1	2	0	0	0	0	0	0	0	0	0	0	0	0	0	0	0	0	0	0	0	0	0	0	0	0	0	0	0	0	0	0	0	0	0	0	0	0	0	D_0__Bacteria; D_1__Firmicutes; D_2__Negativicutes; D_3__Selenomonadales; D_4__Acidaminococcaceae; D_5__uncultured; D_6__uncultured bacterium	D_0__Bacteria	D_1__Firmicutes	D_2__Negativicutes
denovo105730	262	67	25	14	5	0	0	1	0	0	0	0	0	0	0	0	0	0	0	0	0	0	0	0	0	0	0	0	0	0	0	0	0	0	0	0	0	0	0	0	0	0	0	0	0	D_0__Bacteria; D_1__Proteobacteria; D_2__Betaproteobacteria; D_3__Burkholderiales; D_4__Comamonadaceae	D_0__Bacteria	D_1__Proteobacteria	D_2__Betaproteobacteria
denovo8877	261	69	35	28	10	4	0	0	0	0	0	0	0	0	0	0	0	0	0	0	0	0	0	0	0	0	0	0	0	0	0	0	0	0	0	0	0	0	0	0	0	0	0	0	0	D_0__Bacteria; D_1__Firmicutes; D_2__Erysipelotrichia; D_3__Erysipelotrichales; D_4__Erysipelotrichaceae; D_5__Erysipelotrichaceae UCG-004; D_6__uncultured bacterium	D_0__Bacteria	D_1__Firmicutes	D_2__Erysipelotrichia
denovo97199	261	201	75	63	0	0	0	0	0	0	0	1	0	0	0	0	0	0	0	0	0	0	0	0	0	0	0	0	0	0	0	0	0	0	0	0	0	0	0	0	0	0	0	0	0	D_0__Bacteria; D_1__Firmicutes; D_2__Clostridia; D_3__Clostridiales; D_4__Lachnospiraceae	D_0__Bacteria	D_1__Firmicutes	D_2__Clostridia
denovo73090	258	10	9	8	4	0	0	0	0	0	0	0	0	0	0	0	0	0	0	0	0	0	0	0	0	0	0	0	0	0	0	0	0	0	0	0	0	0	0	0	0	0	0	0	0	D_0__Bacteria; D_1__Proteobacteria; D_2__Betaproteobacteria; D_3__Rhodocyclales; D_4__Rhodocyclaceae; D_5__Candidatus Accumulibacter; D_6__uncultured bacterium	D_0__Bacteria	D_1__Proteobacteria	D_2__Betaproteobacteria
denovo18764	256	0	0	0	0	0	0	0	0	0	0	0	0	0	0	0	0	0	0	0	0	0	0	0	0	0	0	0	0	0	0	0	0	0	0	0	0	0	0	0	0	0	0	0	0	D_0__Bacteria; D_1__Spirochaetae; D_2__Spirochaetes; D_3__Spirochaetales; D_4__Spirochaetaceae; D_5__Treponema 2; D_6__uncultured bacterium	D_0__Bacteria	D_1__Spirochaetae	D_2__Spirochaetes
denovo101896	256	12	9	4	2	0	0	0	0	0	0	0	0	0	0	0	0	0	0	0	0	0	0	0	0	0	0	0	0	0	0	0	0	0	0	0	0	0	0	0	0	0	0	0	0	D_0__Bacteria; D_1__Bacteroidetes; D_2__Sphingobacteriia; D_3__Sphingobacteriales; D_4__Saprospiraceae; D_5__uncultured; D_6__uncultured bacterium	D_0__Bacteria	D_1__Bacteroidetes	D_2__Sphingobacteriia
denovo14091	252	114	156	214	34	10	0	0	0	0	0	0	0	0	0	0	0	0	0	0	0	0	0	0	0	0	0	0	0	0	0	0	0	0	0	0	0	0	0	0	0	0	0	0	0	D_0__Bacteria; D_1__Firmicutes; D_2__Clostridia; D_3__Clostridiales; D_4__Lachnospiraceae; D_5__Lachnospira; D_6__uncultured bacterium	D_0__Bacteria	D_1__Firmicutes	D_2__Clostridia
denovo16192	251	92	37	34	22	2	2	3	0	0	0	0	0	0	0	0	0	0	0	0	0	0	0	0	0	0	0	0	0	0	0	0	0	0	0	0	0	0	0	0	0	0	0	0	0	D_0__Bacteria; D_1__Proteobacteria; D_2__Gammaproteobacteria; D_3__Pasteurellales; D_4__Pasteurellaceae; D_5__Chelonobacter; D_6__Chelonobacter oris	D_0__Bacteria	D_1__Proteobacteria	D_2__Gammaproteobacteria
denovo39285	243	30	9	4	1	0	0	0	0	0	0	0	0	0	0	0	0	0	0	0	0	0	0	0	0	0	0	0	0	0	0	0	0	0	0	0	0	0	0	0	0	0	0	0	0	D_0__Bacteria; D_1__Proteobacteria; D_2__Betaproteobacteria; D_3__Burkholderiales; D_4__Comamonadaceae; D_5__uncultured; D_6__uncultured Rhodoferax sp.	D_0__Bacteria	D_1__Proteobacteria	D_2__Betaproteobacteria
denovo7745	234	20	14	10	4	0	0	1	0	0	0	0	0	0	0	0	0	0	0	0	0	0	0	0	0	0	0	0	0	0	0	0	0	0	0	0	0	0	0	0	0	0	0	0	0	D_0__Bacteria; D_1__Proteobacteria; D_2__Betaproteobacteria; D_3__Rhodocyclales; D_4__Rhodocyclaceae; D_5__Dechloromonas	D_0__Bacteria	D_1__Proteobacteria	D_2__Betaproteobacteria
denovo91297	234	1606	1404	1144	241	49	14	7	0	0	0	0	0	0	0	0	0	0	0	0	0	0	0	0	0	0	0	0	0	0	0	0	0	0	0	0	0	0	0	0	0	0	0	0	0	D_0__Bacteria; D_1__Bacteroidetes; D_2__Bacteroidia; D_3__Bacteroidales; D_4__Porphyromonadaceae; D_5__Parabacteroides; D_6__uncultured bacterium	D_0__Bacteria	D_1__Bacteroidetes	D_2__Bacteroidia
denovo69823	231	34	23	17	0	0	0	0	0	0	0	0	0	0	0	0	0	0	0	0	0	0	0	0	0	0	0	0	0	0	0	0	0	0	0	0	0	0	0	0	0	0	0	0	0	D_0__Bacteria; D_1__Bacteroidetes; D_2__Sphingobacteriia; D_3__Sphingobacteriales; D_4__Saprospiraceae; D_5__uncultured; D_6__uncultured bacterium	D_0__Bacteria	D_1__Bacteroidetes	D_2__Sphingobacteriia
denovo114107	230	13	3	1	2	0	0	0	0	0	0	0	0	0	0	0	0	0	0	0	0	0	0	0	0	0	0	0	0	0	0	0	0	0	0	0	0	0	0	0	0	0	0	0	0	D_0__Bacteria; D_1__Bacteroidetes; D_2__Flavobacteriia; D_3__Flavobacteriales; D_4__NS9 marine group; D_5__uncultured bacterium; D_6__uncultured bacterium	D_0__Bacteria	D_1__Bacteroidetes	D_2__Flavobacteriia
denovo114579	230	31	8	2	1	2	0	0	0	0	0	0	0	0	0	0	0	0	0	0	0	0	0	0	0	0	0	0	0	0	0	0	0	0	0	0	0	0	0	0	0	0	0	0	0	D_0__Bacteria; D_1__Proteobacteria; D_2__Betaproteobacteria; D_3__Burkholderiales; D_4__Burkholderiaceae; D_5__Lautropia; D_6__uncultured bacterium	D_0__Bacteria	D_1__Proteobacteria	D_2__Betaproteobacteria
denovo94109	224	40	31	14	2	0	0	0	0	0	0	0	0	0	0	0	0	0	0	0	0	0	0	0	0	0	0	0	0	0	0	0	0	0	0	0	0	0	0	0	0	0	0	0	0	D_0__Bacteria; D_1__Chloroflexi; D_2__Caldilineae; D_3__Caldilineales; D_4__Caldilineaceae; D_5__uncultured; D_6__uncultured bacterium	D_0__Bacteria	D_1__Chloroflexi	D_2__Caldilineae
denovo231	220	5448	7672	4732	89	5	0	6	2	0	0	0	0	0	0	0	0	0	0	0	0	0	0	0	0	0	0	0	0	0	0	0	0	0	0	0	0	0	0	0	0	0	0	0	0	Unassigned	Unassigned	Unassigned	Unassigned
denovo114475	219	57	23	46	11	6	1	1	0	0	0	0	0	0	0	0	0	0	0	0	0	0	0	0	0	0	0	0	0	0	0	0	0	0	0	0	0	0	0	0	0	0	0	0	0	D_0__Bacteria; D_1__Actinobacteria; D_2__Actinobacteria; D_3__Micrococcales; D_4__Intrasporangiaceae; D_5__Ornithinibacter; D_6__Ornithinibacter aureus	D_0__Bacteria	D_1__Actinobacteria	D_2__Actinobacteria
denovo9273	218	106	39	35	3	0	0	0	0	0	0	0	0	0	0	0	0	0	0	0	0	0	0	0	0	0	0	0	0	0	0	0	0	0	0	0	0	0	0	0	0	0	0	0	0	D_0__Bacteria; D_1__Proteobacteria; D_2__Alphaproteobacteria; D_3__Rhodospirillales; D_4__Rhodospirillaceae; D_5__Dongia; D_6__uncultured bacterium	D_0__Bacteria	D_1__Proteobacteria	D_2__Alphaproteobacteria
denovo12271	217	16	12	4	1	0	0	0	0	0	0	0	0	0	0	0	0	0	0	0	0	0	0	0	0	0	0	0	0	0	0	0	0	0	0	0	0	0	0	0	0	0	0	0	0	D_0__Bacteria; D_1__Proteobacteria; D_2__Betaproteobacteria; D_3__Burkholderiales; D_4__Comamonadaceae	D_0__Bacteria	D_1__Proteobacteria	D_2__Betaproteobacteria
denovo114838	215	109	60	117	40	7	7	5	2	0	0	0	0	0	0	0	0	0	0	0	0	0	0	0	0	0	0	0	0	0	0	0	0	0	0	0	0	0	0	0	0	0	0	0	0	D_0__Bacteria; D_1__Actinobacteria; D_2__Acidimicrobiia; D_3__Acidimicrobiales; D_4__Acidimicrobiales Incertae Sedis; D_5__Candidatus Microthrix; D_6__uncultured bacterium	D_0__Bacteria	D_1__Actinobacteria	D_2__Acidimicrobiia
denovo57402	209	8	0	0	0	0	0	0	0	0	0	0	0	0	0	0	0	0	0	0	0	0	0	0	0	0	0	0	0	0	0	0	0	0	0	0	0	0	0	0	0	0	0	0	0	D_0__Bacteria; D_1__Bacteroidetes; D_2__Sphingobacteriia; D_3__Sphingobacteriales; D_4__Saprospiraceae; D_5__Phaeodactylibacter; D_6__uncultured bacterium	D_0__Bacteria	D_1__Bacteroidetes	D_2__Sphingobacteriia
denovo56284	206	4	1	2	0	0	0	0	0	0	0	0	0	0	0	0	0	0	0	0	1	0	0	0	0	0	0	0	0	0	0	0	0	0	0	0	0	0	0	0	0	0	0	0	0	D_0__Bacteria; D_1__Proteobacteria; D_2__Betaproteobacteria; D_3__Burkholderiales; D_4__Comamonadaceae; D_5__Sphaerotilus; D_6__uncultured bacterium	D_0__Bacteria	D_1__Proteobacteria	D_2__Betaproteobacteria
denovo34135	204	18	6	7	2	0	0	0	0	0	0	0	0	0	0	0	0	0	0	0	0	0	0	0	0	0	0	0	0	0	0	0	0	0	0	0	0	0	0	0	0	0	0	0	0	D_0__Bacteria; D_1__Proteobacteria; D_2__Betaproteobacteria; D_3__Burkholderiales; D_4__Comamonadaceae; D_5__Variovorax; D_6__uncultured bacterium	D_0__Bacteria	D_1__Proteobacteria	D_2__Betaproteobacteria
denovo84509	203	30	6	6	1	0	0	0	0	0	0	0	0	0	0	0	0	0	0	0	0	0	0	0	0	0	0	0	0	0	0	0	0	0	0	0	0	0	0	0	0	0	0	0	0	D_0__Bacteria; D_1__Saccharibacteria; D_2__uncultured bacterium; D_3__uncultured bacterium; D_4__uncultured bacterium; D_5__uncultured bacterium; D_6__uncultured bacterium	D_0__Bacteria	D_1__Saccharibacteria	D_2__uncultured bacterium
denovo6668	202	0	1	0	0	0	0	0	0	0	0	0	0	0	0	0	0	0	0	0	0	0	0	0	0	0	0	0	0	0	0	0	0	0	0	0	0	0	0	0	0	0	0	0	0	D_0__Bacteria; D_1__Bacteroidetes; D_2__Bacteroidia; D_3__Bacteroidales; D_4__Bacteroidaceae; D_5__Bacteroides	D_0__Bacteria	D_1__Bacteroidetes	D_2__Bacteroidia
denovo8053	202	35	10	2	6	0	0	2	0	0	0	0	0	0	0	0	0	0	0	0	0	0	0	0	0	0	0	0	0	0	0	0	0	0	0	0	0	0	0	0	0	0	0	0	0	D_0__Bacteria; D_1__Proteobacteria; D_2__Betaproteobacteria; D_3__Rhodocyclales; D_4__Rhodocyclaceae; D_5__Thauera; D_6__uncultured bacterium	D_0__Bacteria	D_1__Proteobacteria	D_2__Betaproteobacteria
denovo96428	202	3	3	1	0	0	0	0	0	0	0	0	0	0	0	0	0	0	0	0	0	0	0	0	0	0	0	0	0	0	0	0	0	0	0	0	0	0	0	0	0	0	0	0	0	D_0__Bacteria; D_1__Proteobacteria; D_2__Betaproteobacteria; D_3__Burkholderiales; D_4__Comamonadaceae	D_0__Bacteria	D_1__Proteobacteria	D_2__Betaproteobacteria
denovo113803	201	329	193	150	14	2	0	1	0	0	0	0	0	0	0	0	0	0	0	0	0	0	0	0	0	0	0	0	0	0	0	0	0	0	0	0	0	0	0	0	0	0	0	0	0	D_0__Bacteria; D_1__Firmicutes; D_2__Negativicutes; D_3__Selenomonadales; D_4__Veillonellaceae; D_5__Megasphaera; D_6__uncultured bacterium	D_0__Bacteria	D_1__Firmicutes	D_2__Negativicutes
denovo7798	199	27	13	11	4	0	0	0	0	0	0	0	0	0	0	0	0	0	0	0	0	0	0	0	0	0	0	0	0	0	0	0	0	0	0	0	0	0	0	0	0	0	0	0	0	D_0__Bacteria; D_1__Proteobacteria; D_2__Betaproteobacteria; D_3__Rhodocyclales; D_4__Rhodocyclaceae; D_5__Sulfuritalea	D_0__Bacteria	D_1__Proteobacteria	D_2__Betaproteobacteria
denovo18155	198	0	0	0	0	0	0	0	1	0	0	0	0	0	0	0	0	0	0	0	0	0	0	0	0	0	0	0	0	0	0	0	0	0	0	0	0	0	0	0	0	0	0	0	0	D_0__Bacteria; D_1__Proteobacteria; D_2__Epsilonproteobacteria; D_3__Campylobacterales; D_4__Campylobacteraceae; D_5__Arcobacter; D_6__uncultured epsilon proteobacterium	D_0__Bacteria	D_1__Proteobacteria	D_2__Epsilonproteobacteria
denovo23423	190	952	362	134	2	1	0	0	0	0	0	0	0	0	0	0	0	0	0	0	0	0	0	0	0	0	0	0	0	0	0	0	0	0	0	0	0	0	0	0	0	0	0	0	0	D_0__Bacteria; D_1__Bacteroidetes; D_2__Bacteroidia; D_3__Bacteroidales; D_4__Bacteroidales S24-7 group; D_5__uncultured bacterium; D_6__uncultured bacterium	D_0__Bacteria	D_1__Bacteroidetes	D_2__Bacteroidia
denovo70530	190	1	1	0	0	0	0	0	0	0	0	0	0	0	0	0	0	0	0	0	0	0	0	0	0	0	0	0	0	0	0	0	0	0	0	0	0	0	0	0	0	0	0	0	0	D_0__Bacteria; D_1__Bacteroidetes; D_2__Sphingobacteriia; D_3__Sphingobacteriales; D_4__Saprospiraceae; D_5__uncultured; D_6__uncultured bacterium	D_0__Bacteria	D_1__Bacteroidetes	D_2__Sphingobacteriia
denovo80698	190	5	0	0	0	0	0	0	0	0	0	0	0	0	0	0	0	0	0	0	0	0	0	0	0	0	0	0	0	0	0	0	0	0	0	0	0	0	0	0	0	0	0	0	0	D_0__Bacteria; D_1__Bacteroidetes; D_2__Sphingobacteriia; D_3__Sphingobacteriales; D_4__PHOS-HE51; D_5__uncultured bacterium; D_6__uncultured bacterium	D_0__Bacteria	D_1__Bacteroidetes	D_2__Sphingobacteriia
denovo57104	186	24	12	3	1	1	0	0	0	0	0	0	0	0	0	0	0	0	0	0	0	0	0	0	0	0	0	0	0	0	0	0	0	0	0	0	0	0	0	0	0	0	0	0	0	D_0__Bacteria; D_1__Firmicutes; D_2__Negativicutes; D_3__Selenomonadales; D_4__Acidaminococcaceae; D_5__Acidaminococcus	D_0__Bacteria	D_1__Firmicutes	D_2__Negativicutes
denovo69740	184	2	0	0	0	0	0	0	0	0	0	0	0	0	0	0	0	0	0	0	0	0	0	0	0	0	0	0	0	0	0	0	0	0	0	0	0	0	0	0	0	0	0	0	0	D_0__Bacteria; D_1__Bacteroidetes; D_2__Sphingobacteriia; D_3__Sphingobacteriales; D_4__Saprospiraceae; D_5__uncultured; D_6__uncultured bacterium	D_0__Bacteria	D_1__Bacteroidetes	D_2__Sphingobacteriia
denovo65134	182	3	1	0	0	0	0	0	0	0	0	0	0	0	0	0	0	0	0	0	0	0	0	0	0	0	0	0	0	0	0	0	0	0	0	0	0	0	0	0	0	0	0	0	0	D_0__Bacteria; D_1__Nitrospirae; D_2__Nitrospira; D_3__Nitrospirales; D_4__Nitrospiraceae; D_5__Nitrospira	D_0__Bacteria	D_1__Nitrospirae	D_2__Nitrospira
denovo10957	178	172	26	0	1	0	0	0	0	0	0	0	0	0	0	0	0	0	0	0	0	0	0	0	0	0	0	0	0	0	0	0	0	0	0	0	0	0	0	0	0	0	0	0	0	D_0__Bacteria; D_1__Bacteroidetes; D_2__Bacteroidia; D_3__Bacteroidales; D_4__Prevotellaceae; D_5__Prevotella 1; D_6__uncultured bacterium	D_0__Bacteria	D_1__Bacteroidetes	D_2__Bacteroidia
denovo89747	176	44	45	31	18	4	1	0	0	0	0	0	0	0	0	0	0	0	0	0	0	0	0	0	0	0	0	0	0	0	0	0	0	0	0	0	0	0	0	0	0	0	0	0	0	D_0__Bacteria; D_1__Proteobacteria; D_2__Alphaproteobacteria; D_3__Sphingomonadales; D_4__Sphingomonadaceae; D_5__Sphingobium; D_6__uncultured bacterium	D_0__Bacteria	D_1__Proteobacteria	D_2__Alphaproteobacteria
denovo14355	174	13	5	2	2	0	0	0	0	0	0	0	0	0	0	0	0	0	0	0	0	0	0	0	0	0	0	0	0	0	0	0	0	0	0	0	0	0	0	0	0	0	0	0	0	D_0__Bacteria; D_1__Proteobacteria; D_2__Betaproteobacteria; D_3__Rhodocyclales; D_4__Rhodocyclaceae; D_5__Propionivibrio	D_0__Bacteria	D_1__Proteobacteria	D_2__Betaproteobacteria
denovo32367	174	436	29	3	2	0	0	3	0	1	0	0	0	0	0	0	0	0	0	0	0	0	0	0	0	0	0	0	0	0	0	0	0	0	0	0	0	0	0	0	0	0	0	0	0	D_0__Bacteria; D_1__Bacteroidetes; D_2__Bacteroidia; D_3__Bacteroidales; D_4__uncultured; D_5__uncultured bacterium; D_6__uncultured bacterium	D_0__Bacteria	D_1__Bacteroidetes	D_2__Bacteroidia
denovo60557	171	33	24	16	6	0	0	0	0	0	0	0	0	0	0	0	0	0	0	0	0	0	0	0	0	0	0	0	0	0	0	0	0	0	0	0	0	0	0	0	0	0	0	0	0	D_0__Bacteria; D_1__Proteobacteria; D_2__Betaproteobacteria; D_3__Burkholderiales; D_4__Comamonadaceae	D_0__Bacteria	D_1__Proteobacteria	D_2__Betaproteobacteria
denovo25259	168	28	10	3	0	0	0	0	0	0	0	0	0	0	0	0	0	0	0	0	0	0	0	0	0	0	0	0	0	0	0	0	0	0	0	0	0	0	0	0	0	0	0	0	0	D_0__Bacteria; D_1__Bacteroidetes; D_2__Sphingobacteriia; D_3__Sphingobacteriales; D_4__Chitinophagaceae; D_5__Filimonas; D_6__uncultured bacterium	D_0__Bacteria	D_1__Bacteroidetes	D_2__Sphingobacteriia
denovo52535	164	0	0	0	0	0	0	0	0	0	0	0	0	0	0	0	0	0	0	0	0	0	0	0	0	0	0	0	0	0	0	0	0	0	0	0	0	0	0	0	0	0	0	0	0	D_0__Bacteria; D_1__Bacteroidetes; D_2__Bacteroidia; D_3__Bacteroidales; D_4__Porphyromonadaceae; D_5__uncultured; D_6__uncultured bacterium	D_0__Bacteria	D_1__Bacteroidetes	D_2__Bacteroidia
denovo95242	161	149	44	40	6	2	0	1	0	0	0	0	0	0	0	0	0	0	0	0	0	0	0	0	0	0	0	0	0	0	0	0	0	0	0	0	0	0	0	0	0	0	0	0	0	D_0__Bacteria; D_1__Firmicutes; D_2__Negativicutes; D_3__Selenomonadales; D_4__Veillonellaceae; D_5__Selenomonas 1	D_0__Bacteria	D_1__Firmicutes	D_2__Negativicutes
denovo79103	158	19	13	9	7	0	0	1	0	0	0	0	0	0	0	0	0	0	0	0	0	0	0	0	0	0	0	0	0	0	0	0	0	0	0	0	0	0	0	0	0	0	0	0	0	D_0__Bacteria; D_1__Planctomycetes; D_2__Phycisphaerae; D_3__Phycisphaerales; D_4__Phycisphaeraceae; D_5__SM1A02; D_6__uncultured planctomycete	D_0__Bacteria	D_1__Planctomycetes	D_2__Phycisphaerae
denovo40402	157	7	2	5	0	0	0	0	0	0	0	0	0	0	0	0	0	0	0	0	0	0	0	0	0	0	0	0	0	0	0	0	0	0	0	0	0	0	0	0	0	0	0	0	0	Unassigned	Unassigned	Unassigned	Unassigned
denovo9921	155	91	53	49	10	7	1	0	1	0	0	0	0	0	0	0	0	0	0	0	0	0	0	0	0	0	0	0	0	0	0	0	0	0	0	0	0	0	0	0	0	0	0	0	0	D_0__Bacteria; D_1__Firmicutes; D_2__Clostridia; D_3__Clostridiales; D_4__Ruminococcaceae; D_5__Ruminococcaceae UCG-014; D_6__uncultured bacterium	D_0__Bacteria	D_1__Firmicutes	D_2__Clostridia
denovo26779	151	755	1118	1296	181	22	1	5	1	0	0	0	0	0	0	0	0	0	0	0	0	0	0	0	0	0	0	0	0	0	0	0	0	0	0	0	0	0	0	0	0	0	0	0	0	D_0__Bacteria; D_1__Firmicutes; D_2__Clostridia; D_3__Clostridiales; D_4__Lachnospiraceae; D_5__Acetitomaculum; D_6__uncultured bacterium	D_0__Bacteria	D_1__Firmicutes	D_2__Clostridia
denovo1127	150	607	737	544	76	16	4	0	1	0	0	0	0	0	0	0	0	0	0	0	0	0	0	0	0	0	0	0	0	0	0	0	0	0	0	0	0	0	0	0	0	0	0	0	0	D_0__Bacteria; D_1__Bacteroidetes; D_2__Bacteroidia; D_3__Bacteroidales; D_4__Prevotellaceae	D_0__Bacteria	D_1__Bacteroidetes	D_2__Bacteroidia
denovo5962	149	9	1	2	1	0	0	0	1	0	0	0	0	0	0	0	0	0	0	0	0	0	0	0	0	0	0	0	0	0	0	0	0	0	0	0	0	0	0	0	0	0	0	0	0	D_0__Bacteria; D_1__Firmicutes; D_2__Negativicutes; D_3__Selenomonadales; D_4__Veillonellaceae; D_5__Propionispira	D_0__Bacteria	D_1__Firmicutes	D_2__Negativicutes
denovo10325	147	7	4	1	0	1	0	0	0	0	0	0	0	0	0	0	0	0	0	0	0	0	0	0	0	0	0	0	0	0	0	0	0	0	0	0	0	0	0	0	0	0	0	0	0	D_0__Bacteria; D_1__Fusobacteria; D_2__Fusobacteriia; D_3__Fusobacteriales; D_4__Hados.Sed.Eubac.3; D_5__uncultured bacterium; D_6__uncultured bacterium	D_0__Bacteria	D_1__Fusobacteria	D_2__Fusobacteriia
denovo12465	145	53	32	23	39	9	11	7	1	0	0	0	0	0	0	0	0	0	0	0	0	0	0	0	0	0	0	0	0	0	0	0	0	0	0	0	0	0	0	0	0	0	0	0	0	D_0__Bacteria; D_1__Proteobacteria; D_2__Gammaproteobacteria; D_3__Cellvibrionales; D_4__Halieaceae; D_5__OM60(NOR5) clade	D_0__Bacteria	D_1__Proteobacteria	D_2__Gammaproteobacteria
denovo50229	144	35	25	28	10	0	0	1	0	0	0	0	0	0	0	0	0	0	0	0	0	0	0	0	0	0	0	0	0	0	0	0	0	0	0	1	0	0	0	0	0	0	0	0	0	D_0__Bacteria; D_1__Proteobacteria; D_2__Alphaproteobacteria; D_3__Sphingomonadales; D_4__Sphingomonadaceae; D_5__Sphingopyxis	D_0__Bacteria	D_1__Proteobacteria	D_2__Alphaproteobacteria
denovo37658	143	5	0	0	0	0	0	0	0	0	0	0	0	0	0	0	0	0	0	0	0	0	0	0	0	0	0	0	0	0	0	0	0	0	0	0	0	0	0	0	0	0	0	0	0	D_0__Bacteria; D_1__Proteobacteria; D_2__Gammaproteobacteria; D_3__Aeromonadales; D_4__Aeromonadaceae; D_5__Aeromonas	D_0__Bacteria	D_1__Proteobacteria	D_2__Gammaproteobacteria
denovo85882	143	19	7	5	2	0	1	1	0	0	0	1	0	0	0	0	0	0	0	0	0	0	0	0	0	0	0	0	0	0	0	0	0	0	0	0	0	0	0	0	0	0	0	0	0	D_0__Bacteria; D_1__Proteobacteria; D_2__Gammaproteobacteria; D_3__Enterobacteriales; D_4__Enterobacteriaceae; D_5__Enterobacter	D_0__Bacteria	D_1__Proteobacteria	D_2__Gammaproteobacteria
denovo8988	142	4	2	0	0	0	0	0	1	0	0	0	0	0	0	0	1	0	0	0	0	0	0	0	0	0	0	0	0	0	0	0	0	1	0	0	0	0	0	0	0	0	0	0	0	D_0__Bacteria; D_1__Proteobacteria; D_2__Gammaproteobacteria; D_3__Pseudomonadales; D_4__Pseudomonadaceae; D_5__Pseudomonas	D_0__Bacteria	D_1__Proteobacteria	D_2__Gammaproteobacteria
denovo13598	142	12	10	6	6	0	0	0	0	0	0	0	0	0	0	0	0	0	0	0	0	0	0	0	0	0	0	0	0	0	0	0	0	0	0	0	0	0	0	0	0	0	0	0	0	D_0__Bacteria; D_1__Proteobacteria; D_2__Betaproteobacteria; D_3__Rhodocyclales; D_4__Rhodocyclaceae; D_5__Zoogloea; D_6__uncultured bacterium	D_0__Bacteria	D_1__Proteobacteria	D_2__Betaproteobacteria
denovo17110	142	6	0	0	0	0	0	0	0	0	0	0	0	0	0	0	0	0	0	0	0	0	0	0	0	0	0	0	0	0	0	0	0	0	0	0	0	0	0	0	0	0	0	0	0	D_0__Bacteria; D_1__Bacteroidetes; D_2__Sphingobacteriia; D_3__Sphingobacteriales; D_4__Sphingobacteriaceae; D_5__Pedobacter	D_0__Bacteria	D_1__Bacteroidetes	D_2__Sphingobacteriia
denovo97473	141	3	1	1	2	0	0	0	0	0	0	0	0	0	0	0	0	0	0	0	0	0	0	0	0	0	0	0	0	0	0	0	0	0	0	0	0	0	0	0	0	0	0	0	0	D_0__Bacteria; D_1__Proteobacteria; D_2__Epsilonproteobacteria; D_3__Campylobacterales; D_4__Campylobacteraceae; D_5__Sulfurospirillum; D_6__uncultured bacterium	D_0__Bacteria	D_1__Proteobacteria	D_2__Epsilonproteobacteria
denovo28325	140	114	100	90	223	162	19186	35022	71982	58161	35088	26360	4340	857	426	3827	6288	8375	10589	9737	6591	3239	5147	867	228	262	630	1037	4190	5626	4574	4005	7185	8648	6544	8367	7945	10322	10190	8802	11021	9648	11136	9765	9056	D_0__Bacteria; D_1__Firmicutes; D_2__Bacilli; D_3__Lactobacillales; D_4__Lactobacillaceae; D_5__Lactobacillus; D_6__uncultured bacterium	D_0__Bacteria	D_1__Firmicutes	D_2__Bacilli
denovo5724	139	60	22	17	1	0	0	1	0	0	0	0	0	0	0	0	0	0	0	0	0	0	0	0	0	0	0	0	0	0	0	0	0	0	0	0	0	0	0	0	0	0	0	0	0	D_0__Bacteria; D_1__Proteobacteria; D_2__Betaproteobacteria; D_3__Neisseriales; D_4__Neisseriaceae; D_5__Alysiella; D_6__uncultured bacterium	D_0__Bacteria	D_1__Proteobacteria	D_2__Betaproteobacteria
denovo20108	139	10	8	5	1	1	0	0	0	0	0	0	0	0	0	0	0	0	0	0	0	0	0	0	0	0	0	0	0	0	0	0	0	0	0	0	0	0	0	0	0	0	0	0	0	D_0__Bacteria; D_1__Proteobacteria; D_2__Betaproteobacteria; D_3__Hydrogenophilales; D_4__Hydrogenophilaceae; D_5__uncultured; D_6__uncultured bacterium	D_0__Bacteria	D_1__Proteobacteria	D_2__Betaproteobacteria
denovo54702	139	12	6	4	0	0	0	0	0	0	0	0	0	0	0	0	0	0	0	0	0	0	0	0	0	0	0	0	0	0	0	0	0	0	0	0	0	0	0	0	0	0	0	0	0	D_0__Bacteria; D_1__Proteobacteria; D_2__Betaproteobacteria; D_3__Rhodocyclales; D_4__Rhodocyclaceae; D_5__Methyloversatilis	D_0__Bacteria	D_1__Proteobacteria	D_2__Betaproteobacteria
denovo95119	139	992	966	394	373	1	0	0	1	0	1	0	0	0	0	0	0	0	0	0	0	0	0	0	0	0	0	0	0	0	0	0	0	0	0	0	0	0	0	0	0	0	0	0	0	D_0__Bacteria; D_1__Bacteroidetes; D_2__Bacteroidia; D_3__Bacteroidales; D_4__Prevotellaceae; D_5__uncultured; D_6__uncultured bacterium	D_0__Bacteria	D_1__Bacteroidetes	D_2__Bacteroidia
denovo102735	136	9	1	5	3	0	2	0	0	0	0	0	0	0	0	0	0	0	0	0	0	0	0	0	0	0	0	0	0	0	0	0	0	0	0	0	1	1	0	0	0	0	0	0	0	D_0__Bacteria; D_1__Firmicutes; D_2__Clostridia; D_3__Clostridiales; D_4__Ruminococcaceae; D_5__Ruminococcus 2; D_6__uncultured bacterium	D_0__Bacteria	D_1__Firmicutes	D_2__Clostridia
denovo35287	135	21	15	7	1	0	0	0	0	0	0	0	0	0	0	0	0	0	0	0	0	0	0	0	0	0	0	0	0	0	0	0	0	0	0	0	0	0	0	0	0	0	0	0	0	D_0__Bacteria; D_1__Proteobacteria; D_2__Alphaproteobacteria; D_3__Rhodospirillales; D_4__Rhodospirillaceae; D_5__uncultured; D_6__uncultured bacterium	D_0__Bacteria	D_1__Proteobacteria	D_2__Alphaproteobacteria
denovo20661	134	15	10	8	1	0	0	0	0	0	0	0	0	0	0	0	0	0	0	0	0	0	0	0	0	0	0	0	0	0	0	0	0	0	0	0	0	0	0	0	0	0	0	0	0	D_0__Bacteria; D_1__Firmicutes; D_2__Erysipelotrichia; D_3__Erysipelotrichales; D_4__Erysipelotrichaceae; D_5__Erysipelotrichaceae UCG-004; D_6__uncultured bacterium	D_0__Bacteria	D_1__Firmicutes	D_2__Erysipelotrichia
denovo39390	134	10	5	0	1	0	0	0	0	0	0	0	0	0	0	0	0	0	0	0	0	0	0	0	0	0	0	0	0	0	0	0	0	0	0	0	0	0	0	0	0	0	0	0	0	D_0__Bacteria; D_1__Firmicutes; D_2__Negativicutes; D_3__Selenomonadales; D_4__Veillonellaceae; D_5__Anaerosinus; D_6__uncultured bacterium	D_0__Bacteria	D_1__Firmicutes	D_2__Negativicutes
denovo17802	132	13	3	1	9	1	0	1	1	0	0	2	0	0	0	0	0	0	0	0	0	0	0	0	4	3	1	0	19	2	1	0	80	10	3	10	2	1	3	6	9	17	4	30	29	D_0__Bacteria; D_1__Bacteroidetes; D_2__Bacteroidia; D_3__Bacteroidales; D_4__Bacteroidaceae; D_5__Bacteroides; D_6__uncultured bacterium	D_0__Bacteria	D_1__Bacteroidetes	D_2__Bacteroidia
denovo13911	132	24	9	7	4	0	0	0	0	0	0	0	0	0	0	0	0	0	0	0	0	0	0	0	0	0	0	0	0	0	0	0	0	0	0	0	0	0	0	0	0	0	0	0	0	D_0__Bacteria; D_1__Proteobacteria; D_2__Betaproteobacteria; D_3__Methylophilales; D_4__Methylophilaceae; D_5__Methylotenera	D_0__Bacteria	D_1__Proteobacteria	D_2__Betaproteobacteria
denovo31509	130	16	14	9	4	2	0	1	0	0	0	0	0	0	0	0	0	0	0	0	0	0	0	0	0	0	0	0	0	0	0	0	0	0	0	0	0	0	0	0	0	0	0	0	0	D_0__Bacteria; D_1__Bacteroidetes; D_2__Flavobacteriia; D_3__Flavobacteriales; D_4__Flavobacteriaceae; D_5__Chryseobacterium	D_0__Bacteria	D_1__Bacteroidetes	D_2__Flavobacteriia
denovo73374	130	46	25	18	8	1	0	0	0	0	0	0	0	0	0	0	0	0	0	0	0	0	0	0	0	0	0	0	0	0	0	0	0	0	0	0	0	0	0	0	0	0	0	0	0	D_0__Bacteria; D_1__Proteobacteria; D_2__Betaproteobacteria; D_3__Rhodocyclales; D_4__Rhodocyclaceae; D_5__Thauera	D_0__Bacteria	D_1__Proteobacteria	D_2__Betaproteobacteria
denovo69477	129	26	9	9	3	1	0	0	0	0	0	0	0	0	0	0	0	0	0	0	0	0	0	0	0	0	0	0	0	0	0	0	0	0	0	0	0	0	0	0	0	0	0	0	0	D_0__Bacteria; D_1__Proteobacteria; D_2__Gammaproteobacteria; D_3__Oceanospirillales; D_4__Halomonadaceae; D_5__Halomonas; D_6__uncultured soil bacterium	D_0__Bacteria	D_1__Proteobacteria	D_2__Gammaproteobacteria
denovo49937	127	0	0	0	0	0	0	0	0	0	0	0	0	0	0	0	0	0	0	0	0	0	0	0	0	0	0	0	0	0	0	0	0	0	0	0	0	0	0	0	0	0	0	0	0	D_0__Bacteria; D_1__Proteobacteria; D_2__Betaproteobacteria	D_0__Bacteria	D_1__Proteobacteria	D_2__Betaproteobacteria
denovo74757	127	202	184	162	22	5	5	4	0	0	0	0	0	0	0	0	0	0	0	0	0	0	0	0	0	0	0	0	0	0	0	0	0	0	0	0	0	0	0	0	0	0	0	0	0	D_0__Bacteria; D_1__Bacteroidetes; D_2__Bacteroidia; D_3__Bacteroidales; D_4__uncultured; D_5__uncultured bacterium; D_6__uncultured bacterium	D_0__Bacteria	D_1__Bacteroidetes	D_2__Bacteroidia
denovo93760	127	248	154	87	19	2	2	5	0	0	0	0	0	0	0	0	0	0	0	0	0	0	0	0	0	0	0	0	0	0	0	0	0	0	0	0	0	0	0	0	0	0	0	0	0	D_0__Bacteria; D_1__Firmicutes; D_2__Negativicutes; D_3__Selenomonadales; D_4__Acidaminococcaceae	D_0__Bacteria	D_1__Firmicutes	D_2__Negativicutes
denovo29642	126	35	20	4	3	0	0	1	0	0	0	0	0	0	0	0	0	0	0	0	0	0	0	0	0	0	0	0	0	0	0	0	0	0	0	0	0	0	0	0	0	0	0	0	0	D_0__Bacteria; D_1__Proteobacteria; D_2__Betaproteobacteria; D_3__Burkholderiales; D_4__Comamonadaceae; D_5__Comamonas	D_0__Bacteria	D_1__Proteobacteria	D_2__Betaproteobacteria
denovo75438	126	231	244	242	77	31	4	4	0	1	0	0	0	0	0	0	0	0	0	0	0	0	0	0	0	0	0	0	0	0	0	0	0	0	0	0	0	0	0	0	0	0	0	0	0	D_0__Bacteria; D_1__Bacteroidetes; D_2__Bacteroidia; D_3__Bacteroidales; D_4__Rikenellaceae; D_5__Rikenellaceae RC9 gut group; D_6__uncultured bacterium	D_0__Bacteria	D_1__Bacteroidetes	D_2__Bacteroidia
denovo111103	126	4	2	1	0	0	0	0	0	0	0	0	0	0	0	0	0	0	0	0	0	0	0	0	0	0	0	0	0	0	0	0	0	0	0	0	0	0	0	0	0	0	0	0	0	D_0__Bacteria; D_1__Proteobacteria; D_2__Betaproteobacteria; D_3__Burkholderiales; D_4__Comamonadaceae; D_5__uncultured; D_6__uncultured bacterium	D_0__Bacteria	D_1__Proteobacteria	D_2__Betaproteobacteria
[truncated: 4,193 more rows]
[truncated: 4 more columns]
