# Supplementary material for: Increasing the economic value of lignocellulosic stillage through medium-chain fatty acid production
Source: Biotechnol Biofuels. 2018 Jul 19;11:200. doi: 10.1186/s13068-018-1193-x (PMC6052542; doi:10.1186/s13068-018-1193-x)
Supplement: Supplementary file 3 — Additional file 3. Data used for development of the technoeconomic analysis (TEA). Table S11. Summary of process modeling for liquid-liquid extraction, solvent distillation, and MCFA separation with ASPEN. Table S12. Summary of capitol expenses added to the NREL TEA. Table S13. Summary of operating expenses and additional product revenues added to NREL TEA. Table S14. 30 year cash flow from NREL TEA updated to include MCFA production expenses and revenues. Table S15. Calculations for additional capital expenses. Table S16. Chemical costs for octanoic acid, hexanoic acid and 2-octanol obtained from Zauba. [file 13068_2018_1193_MOESM3_ESM.xlsx]

## Sheet: Table_S11
Table S11. Summary of process modeling for liquid-liquid extraction, solvent distillation, and MCFA separation with ASPEN
Distillation Column 1
Condenser
Name	Value	Units
Temperature	95.635	C
Subcooled temperature
Heat duty	-2.37196	Gcal/hr
Subcooled duty
Distillate rate	102.347	kmol/hr
Reflux rate	55.3697	kmol/hr
Reflux ratio	0.541
Free water distillate rate
Free water reflux ratio
Distillate to feed ratio	0.8545
Reboiler
Name	Value	Units
Temperature	206.899	C
Heat duty	3.04194	Gcal/hr
Bottoms rate	17.4271	kmol/hr
Boilup rate	274.449	kmol/hr
Boilup ratio	15.7484
Bottoms to feed ratio	0.1455
Distillation Column 2
Condenser
Name	Value	Units
Temperature	205.384	C
Subcooled temperature
Heat duty	-0.321601	Gcal/hr
Subcooled duty
Distillate rate	16.2571	kmol/hr
Reflux rate	13.0057	kmol/hr
Reflux ratio	0.8
Free water distillate rate
Free water reflux ratio
Distillate to feed ratio	0.932862
Reboiler
Name	Value	Units
Temperature	239.167	C
Heat duty	0.323384	Gcal/hr
Bottoms rate	1.17002	kmol/hr
Boilup rate	25.2741	kmol/hr
Boilup ratio	21.6014
Bottoms to feed ratio	0.0671378
Solvent 2octanol Mass Flow	9000	kg/h
	AQU5	EXTRACT5	MCFEFF5	S3SOLREC	S4	S5OCTA	S6HEXA	SOLVENT5
		B3	2OCTSOL2		B4			2OCTSOL2
	2OCTSOL2	2OCTSOL2		B3	B3	B4	B4
	LIQUID	LIQUID	LIQUID	LIQUID	LIQUID	LIQUID	LIQUID	LIQUID
Substream: MIXED
Mole Flow kmol/hr
WATER	22470.3	34.512	22504.8	34.512	5.731e-49	0	0	0
HEXACID	0.610607	16.3401	16.9507	0.182061	16.1581	9.56822e-07	16.1581	0
OCTACID	6.2059e-14	1.26895	1.26895	1.09022e-07	1.26895	1.17002	0.0989307	0
2OCTANOL	5.71696	63.3914	0	63.3913	9.57302e-05	2.7298e-16	9.57302e-05	69.1083
BUTA	21.6531	3.79346	25.4465	3.79346	2.153e-12	1.0124e-28	2.153e-12	0
ACTA	22.0788	0.468111	22.5469	0.468111	5.0088e-26	0	0	0
BUTANOL	0	0	0	0	0	0	0	0
Mass Flow kg/hr
WATER	404808	621.743	405430	621.743	1.0325e-47	0	0	0
HEXACID	70.9282	1898.07	1969	21.1482	1876.92	0.000111145	1876.92	0
OCTACID	8.9498e-12	183	183	1.57225e-05	183	168.733	14.2672	0
2OCTANOL	744.521	8255.48	0	8255.47	0.0124669	3.5551e-14	0.0124669	9000
BUTA	1907.77	334.228	2242	334.228	1.897e-10	8.9197e-27	1.897e-10	0
ACTA	1325.89	28.1113	1354	28.1113	3.0079e-24	0	0	0
BUTANOL	0	0	0	0	0	0	0	0
Total Flow kmol/hr	22520.3	119.774	22571	102.347	17.4271	1.17002	16.2571	69.1083
Total Flow kg/hr	409561	11320.6	410876	9260.7	2059.94	168.733	1891.2	9000
Total Flow l/min	6864.43	218.295	6906.14	195.717	45.7888	3.91749	41.9645	183.772
Temperature C	25.0409	24.9835	25	95.635	206.899	239.167	205.384	25
Pressure bar	1	1	1	1	1	1	1	1
Vapor Frac	0	0	0	0	0	0	0	0
Liquid Frac	1	1	1	1	1	1	1	1
Solid Frac	0	0	0	0	0	0	0	0
Enthalpy cal/mol	-68365	-100410	-68420.2	-89587.6	-125510	-132350	-124910	-105860
Enthalpy cal/gm	-3765.62	-1062.34	-3755.83	-990.099	-1061.83	-917.721	-1073.75	-812.886
Enthalpy cal/sec	-427670000	-3340600	-428980000	-2546900	-607590	-43013.8	-564080	-2032200
Entropy cal/mol-K	-39.079	-161.808	-39.1438	-147.701	-142.812	-177.012	-140.614	-231.546
Entropy cal/gm-K	-2.15252	-1.71195	-2.14874	-1.63235	-1.2082	-1.22742	-1.20875	-1.77797
Density mol/cc	0.0546788	0.00914464	0.0544708	0.00871554	0.0063433	0.00497776	0.00645668	0.00626758
Density gm/cc	0.992696	0.864321	0.992301	0.788611	0.749796	0.717862	0.751112	0.816229
Average MW	18.155	94.5166	18.2171	90.4834	118.203	144.214	116.331	130.23
Liq Vol 60F l/min	6830.57	223.043	6869.79	185.63	37.4132	3.1103	34.3029	183.828
*** ALL PHASES ***
QVALNET Gcal/kg	5.34032e-05	0.00794686	7.54325e-05	0.00822289	0.00670591	0.00736674	0.00664695	0.00897573
API Low Heating Value (Ref @ 16°C) - Gcal/hr	21.8719	89.9635	30.9934	76.1497	13.8137	1.24301	12.5707	80.7816
Total Flow (mgd)	2.61128	0.0830413	2.62715	0.0744524	0.0174184	0.00149024	0.0159636	0.0699083

## Sheet: Table_S12
Table S12. Summary of capital expenses added to the NREL TEA
Mechanical Equipment List											Scaled Installed Costs
EQPT NO		EQUIPMENT TITLE	VENDOR	MODEL	DESCRIPTION	HP	MATERIAL	QUOTE INFO	NUM REQD	$	Year of Quote	Purch Cost in Base Yr	Scaling Variable	Scaling Val	Units	Scaling Exp	Inst Factor	New Val	Size Ratio	Scaled Purch Cost	Purch Cost in Proj year	Inst Cost in Proj year
		Mixed Culture Fermentation Reactor			4 Million Gallon with Cover		CONCRETE		4	27000000	2010	27000000	strm.a600.601	31	MG	0.6	1	4	0.129032	7.90283e+06	7.53839e+06	7.53839e+06
		Mixed Culture Fermentation Stillage Feed Pumps			2500 gpm submersible rail mounted	50			4	231488	2010	231488	strm.a600.601	393100	kg/hr	0.6	1	405430	1.03137	235818	224943	224943
		Caustic Feed System			0-300 gph	1.5			4	30400	2010	30400	strm.a600.601	393100	kg/hr	0.6	1	405430	1.03137	30968.6	29540.5	29540.5
		Liquid-Liquid Extraction			4,700 ft3		316SS		2	170417	2001	170417	strm.a600.601	1	ea	1	2.4	1	2	340833	358148	859554
		Solvent Feed System			50 gpm	3			2	14714	2010	14714	strm.a600.601	59	gpm	0.6	2.3	50	0.847458	13323	12708.6	29229.8
		Distillation Column 1 (Solvent Recovery)			630 ft3		316SS		1	587386	2009	587386	strm.a600.601	1	ea	0.6	2.4	1	1	587386	591325	1.41918e+06
		Distillation Column 2 (MCFA Separation)			240 ft3		316SS		1	329803	2009	329803	strm.a600.601	1	ea	0.6	2.4	1	1	329803	332015	796836

## Sheet: Table_S13
Ethanol Stream	cmix.ethanol.a500.515
Ethanol Production Rate (kg/hr)	#REF!
Ethanol Production Rate (MM gal/yr)	#REF!		Feedstock Dry Tons/yr	#REF!	Biomass Feed + Boiler	#REF!
			gal/ton	#REF!
Table S13. Summary of operating expenses and additional product revenues added to NREL TEA
Variable Operating Costs												DW1102A
	Costing Code	Raw Material	Stream No.	kg/hr	lb/hr	Quoted Price (cents / ton)	Year of Price Quote	2007 Cost ($ / ton)	2007 Cost ($/lb)	$/hour	MM$/yr (2007)	Cents/Gallon Ethanol (2007)
Raw Materials
		KOH	NA	1746	3849.93	86634	2017	864.431	0.432215	1664	13.9942	22.9316
		2-Octanol	NA	745	1642.73	140200	2017	1398.91	0.699455	1149.01	9.6632	15.8346
Additional Product Revenues
		Octanoic Acid	NA	169	kg/hr	by year	2007	$/kg	5.05883	854.942	7.49442	12.2807
		Hexanoic Acid	NA	1877	kg/hr	by year	2007	$/kg	2.88363	5412.58	47.4466	77.7483

## Sheet: Table_S14
Table S14. 30 year cash flow from NREL TEA updated to include MCFA production expenses and revenues.
						Total Capital Investment										Total Capital Investment (Rounded Table)
						Process Area			Purchased Cost	Installed Cost						Process Area			Purchased Cost	Installed Cost
Assumptions	Value		Land Requirement			Area 100: Feedstock handling*			1.42088e+07	2.4155e+07						Area 100: Feedstock handling*			14200000	24200000
Fixed Capital Investment	4.18466e+08		132	Acres		Area 200: Pretreatment			1.99453e+07	2.9918e+07						Area 200: Pretreatment			19900000	29900000
General Plant	3.52655e+08		14000	/acre		Area 200: Neutralization			1.53904e+06	3.03922e+06	Area 200 Total	3.29572e+07				Area 200: Neutralization			1500000	3000000
Steam Plant	6.58111e+07					Area 300: Enzymatic Hydrolysis & Fermentation			1.85121e+07	3.12697e+07						Area 300: Enzymatic Hydrolysis & Fermentation			18500000	31300000
						Area 400: Enzyme Production			1.09591e+07	1.87363e+07						Area 400: Enzyme Production			11000000	18700000
Equity	0.4					Area 500: Recovery			1.11324e+07	2.23177e+07	ISBL Total	1.05281e+08				Area 500: Recovery			11100000	22300000
Loan Interest	0.08					Area 600: Wastewater			5.83825e+07	6.01931e+07						Area 600: Wastewater			58400000	60200000
Loan Term, years	10					Area 700: Storage			2.82662e+06	4.95292e+06						Area 700: Storage			2800000	5000000
Annual Loan Payment	3.74182e+07					Area 800: Boiler			3.63595e+07	6.58111e+07						Area 800: Boiler			36400000	65800000
Periodic expenses		No. Bags	4320			Area 900: Utilities			3.9778e+06	6.87881e+06						Area 900: Utilities			4000000	6900000
Baghouse Bags (5 yr life, Ryton MOC)	466183	Bag Cost	80			Totals (Excl. Area 100)			1.63634e+08	2.43117e+08						Totals (Excl. Area 100)			163600000	243100000
		Quote year	1998			Warehouse		0.04	of ISBL	4.21124e+06						Warehouse		0.04	of ISBL	4200000
						Site Development		0.09	of ISBL	9.47528e+06						Site Development		0.09	of ISBL	9500000
Working Capital (% of FCI)	0.05					Additional Piping		0.045	of ISBL	4.73764e+06						Additional Piping		0.045	of ISBL	4700000
Salvage Value						Total Direct Costs (TDC)				2.61541e+08						Total Direct Costs (TDC)				261500000
General Plant	0	Not permitted since 2002				Prorateable Expenses		0.1	of TDC	2.61541e+07						Prorateable Expenses		0.1	of TDC	26200000
Steam Plant	0	Not permitted since 2002				Field Expenses		0.1	of TDC	2.61541e+07						Field Expenses		0.1	of TDC	26200000
Depreciation Period (Years)						Home Office & Construction Fee		0.2	of TDC	5.23082e+07						Home Office & Construction Fee		0.2	of TDC	52300000
General Plant	7	IRS Pub 946				Project Contingency		0.1	of TDC	2.61541e+07		0.0625	of FCI	0.159833	of PEC	Project Contingency		0.1	of TDC	26200000
Steam/Electricity System	20	IRS Pub 946				Other Costs (Start-Up, Permits, etc.)		0.1	of TDC	2.61541e+07		0.0625	of FCI			Other Costs (Start-Up, Permits, etc.)		0.1	of TDC	26200000
Construction Period (Years)	3					Total Indirect Costs				1.56925e+08		0.958996	of PEC			Total Indirect Costs				156900000
% Spent in Year -2	0.08					Fixed Capital Investment (FCI)				4.18466e+08						Fixed Capital Investment (FCI)				418500000
% Spent in Year -1	0.6					Land				1848000						Land				1800000
% Spent in Year 0	0.32					Working Capital		0.05	of FCI	2.09233e+07						Working Capital		0.05	of FCI	20900000
Start-up Time (Years)	0.25					Total Capital Investment (TCI)				4.41237e+08		Working capital statements				Total Capital Investment (TCI)				441200000
EtOH production/Feedstock use (% of Normal)	0.5											P&T 10% of FCI		4.18466e+07
Variable Costs (% of Normal)	0.75					Lang Factor (FCI/Purchased Equip Cost)				3.1424		One month opcost		8.86228e+06		Lang Factor (TCI/Purchased Equip Cost)				3.1424
Fixed Cost (% of Normal)	1					TCI per annual gallon				$7.23/gal		One year opcost		1.06347e+08		TCI per annual gallon				$7.23/gal
Discount Rate (Internal Rate of Return [IRR])	0.1	Short et. al										Garrett 10% of annual		1.06347e+07
Income Tax Rate	0.35					2007 Dollars						Garrett 35% of annual		3.72216e+07		2007 Dollars
Ethanol Production Rate (MMgal/yr)	61.0259	ASPEN				*Feedstock Handling not included in this calculation				DW1102A		5% of FCI		2.09233e+07		*Feedstock Handling not included in this calculation				DW1102A
Cost Year for Analysis	2007
Minimum Ethanol Selling Price ($/gal)	1.76368	Manipulated Value
									Delta-T factor	1.69994
Net Present Value	0	Targeted Value
DCFROR Worksheet
Year		-2	-1	0	1	2	3	4	5	6	7	8	9	10	11	12	13	14	15	16	17	18	19	20	21	22	23	24	25	26	27	28	29	30
Fixed Capital Investment		1.33909e+07	1.00432e+08	5.35636e+07
Land		1848000																																-1848000
Working Capital				2.09233e+07																														-2.09233e+07
Loan Payment					3.74182e+07	3.74182e+07	3.74182e+07	3.74182e+07	3.74182e+07	3.74182e+07	3.74182e+07	3.74182e+07	3.74182e+07	3.74182e+07	0	0	0	0	0	0	0	0	0	0	0	0	0	0	0	0	0	0	0	0
Loan Interest Payment		1.60691e+06	1.36587e+07	2.00864e+07	2.00864e+07	1.86998e+07	1.72023e+07	1.55851e+07	1.38384e+07	1.1952e+07	9.91472e+06	7.71443e+06	5.33813e+06	2.77172e+06	-3.35276e-10	-3.62098e-10	-3.91066e-10	-4.22351e-10	-4.56139e-10	-4.92631e-10	-5.32041e-10	-5.74604e-10	-6.20573e-10	-6.70219e-10	-7.23836e-10	-7.81743e-10	-8.44282e-10	-9.11825e-10	-9.84771e-10	-1.06355e-09	-1.14864e-09	-1.24053e-09	-1.33977e-09	-6.70219e-10
Loan Principal		2.00864e+07	1.70734e+08	2.51079e+08	2.33748e+08	2.15029e+08	1.94813e+08	1.7298e+08	1.494e+08	1.23934e+08	9.64304e+07	6.67266e+07	3.46465e+07	-4.19095e-09	-4.52623e-09	-4.88833e-09	-5.27939e-09	-5.70174e-09	-6.15788e-09	-6.65051e-09	-7.18255e-09	-7.75716e-09	-8.37773e-09	-9.04795e-09	-9.77179e-09	-1.05535e-08	-1.13978e-08	-1.23096e-08	-1.32944e-08	-1.4358e-08	-1.55066e-08	-1.67471e-08	-1.80869e-08	-9.04795e-09
Ethanol Sales					9.41762e+07	1.0763e+08	1.0763e+08	1.0763e+08	1.0763e+08	1.0763e+08	1.0763e+08	1.0763e+08	1.0763e+08	1.0763e+08	1.0763e+08	1.0763e+08	1.0763e+08	1.0763e+08	1.0763e+08	1.0763e+08	1.0763e+08	1.0763e+08	1.0763e+08	1.0763e+08	1.0763e+08	1.0763e+08	1.0763e+08	1.0763e+08	1.0763e+08	1.0763e+08	1.0763e+08	1.0763e+08	1.0763e+08	1.0763e+08
By-Product Credit					4.9655e+07	5.67485e+07	5.67485e+07	5.67485e+07	5.67485e+07	5.67485e+07	5.67485e+07	5.67485e+07	5.67485e+07	5.67485e+07	5.67485e+07	5.67485e+07	5.67485e+07	5.67485e+07	5.67485e+07	5.67485e+07	5.67485e+07	5.67485e+07	5.67485e+07	5.67485e+07	5.67485e+07	5.67485e+07	5.67485e+07	5.67485e+07	5.67485e+07	5.67485e+07	5.67485e+07	5.67485e+07	5.67485e+07	5.67485e+07
Total Annual Sales					1.43831e+08	1.64378e+08	1.64378e+08	1.64378e+08	1.64378e+08	1.64378e+08	1.64378e+08	1.64378e+08	1.64378e+08	1.64378e+08	1.64378e+08	1.64378e+08	1.64378e+08	1.64378e+08	1.64378e+08	1.64378e+08	1.64378e+08	1.64378e+08	1.64378e+08	1.64378e+08	1.64378e+08	1.64378e+08	1.64378e+08	1.64378e+08	1.64378e+08	1.64378e+08	1.64378e+08	1.64378e+08	1.64378e+08	1.64378e+08
Annual Manufacturing Cost
Feedstock					3.9551e+07	4.52011e+07	4.52011e+07	4.52011e+07	4.52011e+07	4.52011e+07	4.52011e+07	4.52011e+07	4.52011e+07	4.52011e+07	4.52011e+07	4.52011e+07	4.52011e+07	4.52011e+07	4.52011e+07	4.52011e+07	4.52011e+07	4.52011e+07	4.52011e+07	4.52011e+07	4.52011e+07	4.52011e+07	4.52011e+07	4.52011e+07	4.52011e+07	4.52011e+07	4.52011e+07	4.52011e+07	4.52011e+07	4.52011e+07
Baghouse Bags					466183					466183					466183					466183					466183					466183
Other Variable Costs					4.72053e+07	5.03523e+07	5.03523e+07	5.03523e+07	5.03523e+07	5.03523e+07	5.03523e+07	5.03523e+07	5.03523e+07	5.03523e+07	5.03523e+07	5.03523e+07	5.03523e+07	5.03523e+07	5.03523e+07	5.03523e+07	5.03523e+07	5.03523e+07	5.03523e+07	5.03523e+07	5.03523e+07	5.03523e+07	5.03523e+07	5.03523e+07	5.03523e+07	5.03523e+07	5.03523e+07	5.03523e+07	5.03523e+07	5.03523e+07
Fixed Operating Costs					1.07939e+07	1.07939e+07	1.07939e+07	1.07939e+07	1.07939e+07	1.07939e+07	1.07939e+07	1.07939e+07	1.07939e+07	1.07939e+07	1.07939e+07	1.07939e+07	1.07939e+07	1.07939e+07	1.07939e+07	1.07939e+07	1.07939e+07	1.07939e+07	1.07939e+07	1.07939e+07	1.07939e+07	1.07939e+07	1.07939e+07	1.07939e+07	1.07939e+07	1.07939e+07	1.07939e+07	1.07939e+07	1.07939e+07	1.07939e+07
Total Product Cost					9.80164e+07	1.06347e+08	1.06347e+08	1.06347e+08	1.06347e+08	1.06814e+08	1.06347e+08	1.06347e+08	1.06347e+08	1.06347e+08	1.06814e+08	1.06347e+08	1.06347e+08	1.06347e+08	1.06347e+08	1.06814e+08	1.06347e+08	1.06347e+08	1.06347e+08	1.06347e+08	1.06814e+08	1.06347e+08	1.06347e+08	1.06347e+08	1.06347e+08	1.06814e+08	1.06347e+08	1.06347e+08	1.06347e+08	1.06347e+08
Annual Depreciation
General Plant Writedown					0.1429	0.2449	0.1749	0.1249	0.0893	0.0892	0.0893	0.0446
Depreciation Charge					5.03943e+07	8.63651e+07	6.16793e+07	4.40466e+07	3.14921e+07	3.14568e+07	3.14921e+07	1.57284e+07
Remaining Value					3.0226e+08	2.15895e+08	1.54216e+08	1.10169e+08	7.86772e+07	4.72204e+07	1.57284e+07	-2.6077e-08
Steam Plant Writedown					0.0375	0.07219	0.06677	0.06177	0.05713	0.05285	0.04888	0.04522	0.04462	0.04461	0.04462	0.04461	0.04462	0.04461	0.04462	0.04461	0.04462	0.04461	0.04462	0.04461	0.02231
Depreciation Charge					2.46792e+06	4.75091e+06	4.39421e+06	4.06515e+06	3.75979e+06	3.47812e+06	3.21685e+06	2.97598e+06	2.93649e+06	2.93583e+06	2.93649e+06	2.93583e+06	2.93649e+06	2.93583e+06	2.93649e+06	2.93583e+06	2.93649e+06	2.93583e+06	2.93649e+06	2.93583e+06	1.46825e+06
Remaining Value					6.33432e+07	5.85923e+07	5.41981e+07	5.01329e+07	4.63732e+07	4.2895e+07	3.96782e+07	3.67022e+07	3.37657e+07	3.08299e+07	2.78934e+07	2.49576e+07	2.20211e+07	1.90852e+07	1.61487e+07	1.32129e+07	1.02764e+07	7.34057e+06	4.40408e+06	1.46825e+06	9.0804e-09
Net Revenue					-2.71338e+07	-5.17847e+07	-2.52447e+07	-5.66566e+06	8.94086e+06	1.0678e+07	1.34075e+07	3.16123e+07	4.97565e+07	5.23235e+07	5.46284e+07	5.50953e+07	5.50946e+07	5.50953e+07	5.50946e+07	5.46291e+07	5.50946e+07	5.50953e+07	5.50946e+07	5.50953e+07	5.60967e+07	5.80311e+07	5.80311e+07	5.80311e+07	5.80311e+07	5.75649e+07	5.80311e+07	5.80311e+07	5.80311e+07	5.80311e+07
Losses Forward						-2.71338e+07	-7.89185e+07	-1.04163e+08	-1.09829e+08	-1.00888e+08	-9.021e+07	-7.68026e+07	-4.51903e+07	0	0	0	0	0	0	0	0	0	0	0	0	0	0	0	0	0	0	0	0	0
Taxable Income					-2.71338e+07	-7.89185e+07	-1.04163e+08	-1.09829e+08	-1.00888e+08	-9.021e+07	-7.68026e+07	-4.51903e+07	4.56623e+06	5.23235e+07	5.46284e+07	5.50953e+07	5.50946e+07	5.50953e+07	5.50946e+07	5.46291e+07	5.50946e+07	5.50953e+07	5.50946e+07	5.50953e+07	5.60967e+07	5.80311e+07	5.80311e+07	5.80311e+07	5.80311e+07	5.75649e+07	5.80311e+07	5.80311e+07	5.80311e+07	5.80311e+07
Income Tax					0	0	0	0	0	0	0	0	1.59818e+06	1.83132e+07	1.912e+07	1.92833e+07	1.92831e+07	1.92833e+07	1.92831e+07	1.91202e+07	1.92831e+07	1.92833e+07	1.92831e+07	1.92833e+07	1.96338e+07	2.03109e+07	2.03109e+07	2.03109e+07	2.03109e+07	2.01477e+07	2.03109e+07	2.03109e+07	2.03109e+07	2.03109e+07
Annual Cash Income					8.39654e+06	2.06129e+07	2.06129e+07	2.06129e+07	2.06129e+07	2.01467e+07	2.06129e+07	2.06129e+07	1.90147e+07	2.29963e+06	3.8445e+07	3.87478e+07	3.8748e+07	3.87478e+07	3.8748e+07	3.84447e+07	3.8748e+07	3.87478e+07	3.8748e+07	3.87478e+07	3.79311e+07	3.77202e+07	3.77202e+07	3.77202e+07	3.77202e+07	3.74172e+07	3.77202e+07	3.77202e+07	3.77202e+07	3.77202e+07
Discount Factor		1.21	1.1	1	0.909091	0.826446	0.751315	0.683013	0.620921	0.564474	0.513158	0.466507	0.424098	0.385543	0.350494	0.318631	0.289664	0.263331	0.239392	0.217629	0.197845	0.179859	0.163508	0.148644	0.135131	0.122846	0.111678	0.101526	0.092296	0.0839055	0.0762777	0.0693433	0.0630394	0.148644
Annual Present Value	2.37071e+08				7.63321e+06	1.70354e+07	1.54868e+07	1.40789e+07	1.2799e+07	1.13723e+07	1.05777e+07	9.61606e+06	8.06408e+06	886606	1.34747e+07	1.23462e+07	1.12239e+07	1.02035e+07	9.27596e+06	8.3667e+06	7.66608e+06	6.96913e+06	6.33561e+06	5.75961e+06	5.12565e+06	4.63378e+06	4.21252e+06	3.82957e+06	3.48143e+06	3.13951e+06	2.87721e+06	2.61565e+06	2.37786e+06	5.60687e+06
Total Capital Investment + Interest		2.03834e+07	1.255e+08	9.45732e+07																														-3.38481e+06
Net Present Worth				0
					If taxable income < 0, tax = $0
					Loan Interest subtracted from taxable income.
					Loan payment subtracted from annual cash income
					Interest on construction loan added to investment
NPV of Income Tax	7.36284e+07				0	0	0	0	0	0	0	0	677784	7.06055e+06	6.70143e+06	6.14427e+06	5.58563e+06	5.07791e+06	4.61622e+06	4.16111e+06	3.81506e+06	3.46828e+06	3.15294e+06	2.86635e+06	2.65313e+06	2.49511e+06	2.26828e+06	2.06207e+06	1.87461e+06	1.6905e+06	1.54927e+06	1.40842e+06	1.28039e+06	3.01908e+06
NPV of Ethanol Income	1.01222e+09				8.56147e+07	8.89504e+07	8.0864e+07	7.35127e+07	6.68297e+07	6.07543e+07	5.52312e+07	5.02102e+07	4.56456e+07	4.1496e+07	3.77236e+07	3.42942e+07	3.11766e+07	2.83423e+07	2.57658e+07	2.34234e+07	2.1294e+07	1.93582e+07	1.75984e+07	1.59985e+07	1.45441e+07	1.32219e+07	1.20199e+07	1.09272e+07	9.93381e+06	9.03074e+06	8.20976e+06	7.46342e+06	6.78493e+06	1.59985e+07		1.01222e+09
							0.32	0.192	0.1152	0.1152	0.0576
							0.16	0.096	0.0576	0.0576	0.0288

## Sheet: Table_S15
Table S15. Calculations for additional capital expenses
Mixed Culture Fermentation Reactors
Parameter	Value	Units	Notes
Influent Flow Rate	6906	L/min	From ASPEN Mass Balance
Influent Flow Rate	2.6271	MGD
Solids Rentention Time	6	d	SRT used operations of MCF reactor in this study
Required Volume	15.7626	MG
Number of Reactors	4
Volume Per Reactor	3.94064	MG
Scaling Exponent1	0.6		Standard value; Same as used in NREL TEA
Installation Factor2	1		Installation included in quote for anaeorbic digesters
Scaling Value	31	MG	Volume used for NREL TEA Anerobic Digester Quote
New Value	4	MG
Unscaled Cost	27000000
Scaled Cost	7.90283e+06
Installed Cost	7.90283e+06
Year of Quote	2010
Cost Index for Quote Year	550.8
Cost Index for 2007	525.4
Total Cost	7.53839e+06
Mixed Culture Fermentation Stillage Feed Pumps
Parameter	Value	Units	Notes
Nuber of Pumps	4
Scaling Exponent1	0.6		Standard value; Same as used in NREL TEA
Installation Factor2	1		Installation included in quote for pumps
Scaling Value	393100	kghr	Mass flow rate used for NREL TEA Feed Pump Quote
New Value	405430	kg/hr
Unscaled Cost	231488
Scaled Cost	235818
Installed Cost	235818
Year of Quote	2010
Cost Index for Quote Year	550.8
Cost Index for 2007	525.4
Total Cost	224943
Mixed Culture Fermentation Caustic Pumps
Parameter	Value	Units	Notes
Nuber of Pumps	4
Scaling Exponent	0.6		Standard value; Same as used in NREL TEA
Installation Factor	1		Installation included in quote for pumps
Scaling Value	393100	kghr	Mass flow rate used for NREL TEA Feed Pump Quote
New Value	405430	kg/hr
Unscaled Cost	30400
Scaled Cost	30968.6
Installed Cost	30968.6
Year of Quote	2010
Cost Index for Quote Year	550.8
Cost Index for 2007	525.4
Total 2007 Cost	29540.5
Liquid-Liquid Extraction
Parameter	Value	Units	Notes
Total Influent Flow	7089.91	L/min	MCF Effluent + Solvent
Total Influent Flow	15022	ft3/hr
Max Throughput	120	ft3/ft2 -hr	From Sedier, et al. 2009.
Minimum Cross Sectioal Area	125.183	ft2
Safety Factor	1.66667
Required Cross Sectional Area	208.639	ft2
Number of Units	2
Area Per Unit	104.319
Diameter of Each Unit	11.5249	ft
Stages	15
HETP	3	ft
Total Stage Height	45
Free Board Each End	3	ft
Working Volume Per Unit	4694.38	ft3
Total Volume Per Unit	5007.33	ft3
S	1760.63		S = H*D^1.5, From Seider et al. 2009
Raw Cost (2001 USD)	170417		C = 320*S^0.84, From Seider et al. 2009
2001 Cost Index	500
2007 Cost Index	525.4
2007 Raw Cost	179074
Installation Factor	2.4		Used in NREL TEA for similar process capital costs
Cost Per Unit	429777
Total Cost	859554
Solvent Feed Pump
Parameter	Value	Units	Notes
Nuber of Pumps	2
Scaling Exponent	0.6		Standard value; Same as used in NREL TEA
Installation Factor	2.3		Used for similar sized Cellulase Transfer Pumps in NREL TEA
Scaling Value	59	gpm	Mass flow rate used for NREL TEA Feed Pump Quote
New Value	50	kg/hr
Unscaled Cost	14714		Based on cost for Cellulase Pumps in NREL TEA
Scaled Cost	13323
Installed Cost	30642.9
Year of Quote	2010
Cost Index for Quote Year	550.8
Cost Index for 2007	525.4
Total 2007 Cost	29229.8
Distilation Column 1 (Solvent Recovery)
Parameter	Value	Units	Notes
Scaling Exponent	0.6		Standard value; Same as used in NREL TEA
Scaling Value	11699.3	ft3	Mass flow rate used for NREL TEA Feed Pump Quote
New Value	624.806	ft3
Unscaled Cost	3407000		Cost for Beer Distillation Column in NREL TEA
Scaled Cost	587386
Installation Factor	2.4		Used for similar sized Beer Distillation Column in NREL TEA
Installed Cost	1.40973e+06
Year of Quote	2010
Cost Index for Quote Year	550.8
Cost Index for 2007	525.4
Total 2007 Cost	1.34472e+06
Distilation Column 1 (MCFA Separation)
Parameter	Value	Units	Notes
Scaling Exponent	0.6		Standard value; Same as used in NREL TEA
Scaling Value	11699.3	ft3	Mass flow rate used for NREL TEA Feed Pump Quote
New Value	238.761	ft3
Unscaled Cost	3407000		Cost for Beer Distillation Column in NREL TEA
Scaled Cost	329803
Installation Factor	2.4		Used for similar sized Beer Distillation Column in NREL TEA
Installed Cost	791528
Year of Quote	2009
Cost Index for Quote Year	521.9
Cost Index for 2007	525.4
Total 2007 Cost	796836

## Sheet: Table_S16
Table S16. Chemical costs for octanoic acid, hexanoic acid and 2-octanol obatined from Zauba
Octanoic Acid
Date	HS Code	Description	Origin Country	Port of Discharge	Unit	Quantity	Value (INR)	Per Unit (INR)	Per Unit (USD)
2016	38231900	CAPRIC CAPRYLIC ACID (C 810)	Malaysia	Kolkata Sea	KGS	5040	1326304	263	4.208
2016	Octanoic Acid	CAPRYLIC - CAPRIC ACID (ISOTANK)	Indonesia	Nhava Sheva Sea	KGS	20010	5232274	261	4.176
2016	38231900	CAPRYLIC - CAPRIC ACID PALMERA A5608 (ISOTANK)	Malaysia	Nhava Sheva Sea	KGS	19650	4899446	249	3.984
2016	38231900	CAPRYLIC - CAPRIC ACID PALMERA A5608 (ISOTANK)	Malaysia	Nhava Sheva Sea	KGS	19300	4919195	255	4.08
2016	29159020	CAPRYLIC ACID	China	Nhava Sheva Sea	KGS	60000	20369156	339	5.424
2016	29159020	CAPRYLIC ACID	China	Nhava Sheva Sea	KGS	60000	20281002	338	5.408
2016	29159020	CAPRYLIC ACID	China	Nhava Sheva Sea	KGS	60000	20206768	337	5.392
2016	29159020	CAPRYLIC ACID	China	Nhava Sheva Sea	KGS	60000	19865286	331	5.296
2016	29159020	CAPRYLIC ACID	China	Nhava Sheva Sea	KGS	40000	13539350	338	5.408
2016	29159020	CAPRYLIC ACID	China	Nhava Sheva Sea	KGS	40000	13539350	338	5.408
2016	29159020	CAPRYLIC ACID	China	Nhava Sheva Sea	KGS	40000	13579437	339	5.424
2016	29159020	CAPRYLIC ACID	China	Nhava Sheva Sea	KGS	40000	13609503	340	5.44
2016	29159020	CAPRYLIC ACID	China	Nhava Sheva Sea	KGS	40000	13669633	342	5.472
2016	29159020	CAPRYLIC ACID	China	Nhava Sheva Sea	KGS	40000	13669633	342	5.472
2016	29159020	CAPRYLIC ACID	China	Nhava Sheva Sea	KGS	40000	13669633	342	5.472
2016	29159020	CAPRYLIC ACID	China	Nhava Sheva Sea	KGS	40000	13689676	342	5.472
2016	29159020	CAPRYLIC ACID	Indonesia	Nhava Sheva Sea	KGS	40000	13487131	337	5.392
2016	29159020	CAPRYLIC ACID	China	Nhava Sheva Sea	KGS	2700	905296	335	5.36
2016	29159020	CAPRYLIC ACID	China	Nhava Sheva Sea	KGS	1620	538367	332	5.312
2016	29159020	CAPRYLIC ACID	Malaysia	Nhava Sheva Sea	KGS	1440	545146	379	6.064
2016	29159020	CAPRYLIC ACID (OCTANOIC ACID )	Malaysia	Nhava Sheva Sea	KGS	19950	6515448	327	5.232
2016	29159020	CAPRYLIC ACID (OCTANOIC ACID)	Malaysia	Nhava Sheva Sea	KGS	19980	6472037	324	5.184
2016	29159020	CAPRYLIC ACID (OCTANOIC ACID)	Malaysia	Nhava Sheva Sea	KGS	19960	6465559	324	5.184
2016	29159020	CAPRYLIC ACID 99% MIN	Malaysia	Nhava Sheva Sea	KGS	7200	2467197	343	5.488
2016	29159020	CAPRYLIC ACID C-899 (ADC LIST NO: 386/387)	Malaysia	Chennai Sea	KGS	7200	2514978	349	5.584
2016	29159090	CAPRYLIC ACID C899	Malaysia	Nhava Sheva Sea	KGS	14400	5015393	348	5.568
2016	29159020	CAPRYLIC ACID C899 (ADC LIST NO: 381)	Malaysia	Chennai Sea	KGS	7200	2567013	357	5.712
2016	38231900	CAPRYLIC CAPRIC ACID (ISOTANK)	Indonesia	Nhava Sheva Sea	KGS	20080	5342876	266	4.256
2016	38231900	CAPRYLIC CAPRIC ACID (ISOTANK)	Indonesia	Nhava Sheva Sea	KGS	20080	5358695	267	4.272
2016	38231900	CAPRYLIC CAPRIC ACID (ISOTANK)	Indonesia	Nhava Sheva Sea	KGS	20060	5365210	267	4.272
2016	38231900	CAPRYLIC CAPRIC ACID (ISOTANK)	Indonesia	Nhava Sheva Sea	KGS	20060	5176330	258	4.128
2016	38231900	CAPRYLIC CAPRIC ACID (ISOTANK)	Indonesia	Nhava Sheva Sea	KGS	20050	5215906	260	4.16
2016	38231900	CAPRYLIC CAPRIC ACID (ISOTANK)	Indonesia	Nhava Sheva Sea	KGS	20040	5359861	267	4.272
2016	38231900	CAPRYLIC CAPRIC ACID (ISOTANK)	Indonesia	Nhava Sheva Sea	KGS	20040	5232457	261	4.176
2016	38231900	CAPRYLIC CAPRIC ACID (ISOTANK)	Indonesia	Nhava Sheva Sea	KGS	20030	5222189	261	4.176
2016	38231900	CAPRYLIC CAPRIC ACID (ISOTANK)	Indonesia	Nhava Sheva Sea	KGS	20010	5182552	259	4.144
2016	38231900	CAPRYLIC CAPRIC ACID (ISOTANK)	Indonesia	Nhava Sheva Sea	KGS	19990	5154446	258	4.128
2016	38231900	CAPRYLIC CAPRIC ACID (ISOTANK)	Indonesia	Nhava Sheva Sea	KGS	19980	5316268	266	4.256
2016	38231900	CAPRYLIC CAPRIC ACID (ISOTANK)	Indonesia	Nhava Sheva Sea	KGS	19970	5317540	266	4.256
2016	38231900	CAPRYLIC CAPRIC ACID (ISOTANK)	Indonesia	Nhava Sheva Sea	KGS	19960	5326671	267	4.272
2016	38231900	CAPRYLIC CAPRIC ACID (ISOTANK)	Indonesia	Nhava Sheva Sea	KGS	19950	5201332	261	4.176
2016	38231900	CAPRYLIC CAPRIC ACID (ISOTANK)	Indonesia	Nhava Sheva Sea	KGS	19950	5189892	260	4.16
2016	38231900	CAPRYLIC CAPRIC ACID (ISOTANK)	Indonesia	Nhava Sheva Sea	KGS	19950	5147946	258	4.128
2016	29159090	EMERY 657 (CAPRYLIC ACID98% MIN)	Malaysia	Nhava Sheva Sea	KGS	3600	1288289	358	5.728
2016	29159020	KORTACID 0899 (K) P CAPRYLIC ACID 99% FATTY ACID C8 99.6%	Malaysia	Nhava Sheva Sea	KGS	1800	603531	335	5.36
2016	29159020	KORTACID 0899 (K) P CAPRYLIC ACID 99% FATTY ACID C8 99.7%	Malaysia	Nhava Sheva Sea	KGS	1800	645408	359	5.744
2016	29159090	OCTAANZUUR (OCTANOIC ACID) (USE IN PRINTING INDUSTRY )	Belgium	Nhava Sheva Sea	KGS	1700	633665	373	5.968
2016	29159090	OCTAANZUUR (OCTANOIC ACID) (USE IN PRINTING INDUSTRY)	Belgium	Nhava Sheva Sea	KGS	2550	949063	372	5.952
2016	29159090	OCTAANZUUR (OCTANOIC ACID) (USE IN PRINTING INDUSTRY)	Belgium	Nhava Sheva Sea	KGS	2550	967644	379	6.064
2016	29159090	OCTAANZUUR (OCTANOIC ACID) (USE IN PRINTING INDUSTRY)	Belgium	Nhava Sheva Sea	KGS	1700	651337	383	6.128
2016	29159090	OCTAANZUUR (OCTANOIC ACID) (USE IN PRINTING INDUSTRY)	Belgium	Nhava Sheva Sea	KGS	1700	636956	375	6
2016	29159090	OCTAANZUUR (OCTANOIC ACID) (USE IN PRINTING INDUSTRY)	Belgium	Nhava Sheva Sea	KGS	1700	516405	304	4.864
2016	29159090	OCTAANZUUR (OCTANOIC ACID) (USE IN PRINTING INDUSTRY)	Belgium	Nhava Sheva Sea	KGS	1700	516753	304	4.864
2016	29159090	OCTAANZUUR (OCTANOIC ACID) (USE IN PRINTING INDUSTRY)	Belgium	Nhava Sheva Sea	KGS	1700	511175	301	4.816
2016	29159020	PALMAC 99-08 CAPRYLIC ACID (ADC LIST NO:386/387)	Malaysia	Chennai Sea	KGS	7200	2491980	346	5.536
2016	29159020	PALMAC 99-08 CAPRYLIC ACID(ADC LIST NO: 381)	Malaysia	Chennai Sea	KGS	7200	2701934	375	6
2016	29159020	PALMAC 99-08 CAPRYLIC ACID(ADC LIST NO: 381)	Malaysia	Chennai Sea	KGS	7200	2457645	341	5.456
2016	29159020	PALMAC 99-08 CAPRYLIC ACID(ADC LIST NO: 381)	Malaysia	Chennai Sea	KGS	4513	1541598	342	5.472
2016	29159020	PALMAC 99-08 CAPRYLIC ACID(ADC LIST NO: 381)	Malaysia	Chennai Sea	KGS	1876	640824	342	5.472
2016	29159020	PALMERA A9908 CAPRYLIC ACID 99 % LIQUID	Malaysia	Nhava Sheva Sea	KGS	13735	4639018	338	5.408
2016	29159020	PALMERA A9908 CAPRYLIC ACID 99 PCT LIQUID(OCTOIC ACID)	Malaysia	Nhava Sheva Sea	KGS	5040	1840924	365	5.84
								Avg	5.0741
								Min	3.984
								Max	6.128
Hexanoic Acid
Date	HS Code	Description	Origin Country	Port of Discharge	Unit	Quantity	Value (INR)	Per Unit (INR)	Per Unit USD
2015	29159030	CAPROIC ACID 99% LIQUID (AROMATIC CHEMICALS)	Malaysia	Nhava Sheva Sea	KGS	14400	2496449	173	2.768
2016	29159030	CAPROIC ACID (INVOICE NO. 234/BJ/2015-16/CAPROIC ACID)	United States	Nhava Sheva Sea	KGS	13860	1328722	96	1.536
2016	29159030	CAPROIC ACID	Malaysia	Nhava Sheva Sea	KGS	8100	1811989	224	3.584
2016	29159030	CAPROIC ACID 99 PERCENT LIQUID	Malaysia	Nhava Sheva Sea	KGS	7200	1382687	192	3.072
2016	29159030	CAPROIC ACID 99 PCT LIQUID	Malaysia	Nhava Sheva Sea	KGS	7200	1350967	188	3.008
2016	29159030	CAPROIC ACID 99% MIN (PALMERA C0699)	Malaysia	Nhava Sheva Sea	KGS	7200	1423003	198	3.168
2016	29159090	PALMERA CAPROIC ACID A9906	Malaysia	Nhava Sheva Sea	KGS	5400	1150549	213	3.408
2016	29159030	CAPROIC ACID	China	Nhava Sheva Sea	KGS	5400	993255	184	2.944
2015	29159030	CAPROIC ACID 99% LIQUID (AROMATIC CHEMICALS)	Malaysia	Nhava Sheva Sea	KGS	5040	873757	173	2.768
2015	29159030	CAPROIC ACID 99% LIQUID (AROMATIC CHEMICALS)	Malaysia	Nhava Sheva Sea	KGS	5040	873757	173	2.768
2015	29159030	CAPROIC ACID 99 PCT LIQUID	Malaysia	Nhava Sheva Sea	KGS	4859	782375	161	2.576
2015	29159030	CAPROIC ACID	China	Nhava Sheva Sea	KGS	2880	552948	192	3.072
2015	29159030	CAPROIC ACID 99 PCT LIQUID	Malaysia	Nhava Sheva Sea	KGS	2341	376938	161	2.576
2016	29159030	CAPROIC ACID 99 PCT LIQUID	Malaysia	Nhava Sheva Sea	KGS	2242	374716	167	2.672
2016	29159030	CAPROIC ACID (ADC.SL.NO.383)	China	Chennai Sea	KGS	2160	443410	205	3.28
2016	29159030	CAPROIC ACID	China	Nhava Sheva Sea	KGS	2160	439483	203	3.248
2016	29159030	CAPROIC ACID 99 PCT LIQUID	Malaysia	Nhava Sheva Sea	KGS	1358	226969	167	2.672
								Avg	2.88941
								Min	1.536
								Max	3.584
2-Octanol
Date	HS Code	Description	Origin Country	Port of Discharge	Unit	Quantity	Value (INR)	Per Unit (INR)	Per Unit USD
2016	29051690	2-OCTANOL (CAPRYL ALCOHOL) (PACKED 1 INLIQUID BULK TANK CONTAINER)	Netherlands	Nhava Sheva Sea	KGS	18530	1733387	94	1.504
2016	29051690	2-OCTANOL /CAPRYL ALCOHOL.	United States	Nhava Sheva Sea	KGS	20970	1668427	80	1.28
2016	29051690	2-OCTANOL (CAPRYL ALCOHOL) (PACKED 1 INLIQUID BULK TANK CONTAINER)	Netherlands	Nhava Sheva Sea	KGS	18630	1739169	93	1.488
2016	29051690	2-OCTANOL (CAPRYL ALCOHOL)	Netherlands	Nhava Sheva Sea	KGS	18610	1780973	96	1.536
2016	29051690	2-OCTANOL /CAPRYL ALCOHOL	United States	Nhava Sheva Sea	KGS	20830	1673900	80	1.28
2016	29051690	2-OCTANOL (CAPRYL ALCOHOL) (PACKED 60 DRUMS RE-PACKED ON 15 PALLETS)	United States	Nhava Sheva Sea	KGS	11520	1288759	112	1.792
2016	29051690	2-OCTANOL //CAPRYL ALCOHOL	United States	Nhava Sheva Sea	KGS	20950	1665584	80	1.28
2016	29051690	2-OCTANOL (CAPRYL ALCOHOL) (PACKED 1 INLIQUID BULK TANK CONTAINER)	Netherlands	Nhava Sheva Sea	KGS	18400	2011389	109	1.744
2016	29051690	2-OCTANOL (CAPRYL ALCOHOL) (PACKED 1 INLIQUID BULK TANK CONTAINER)	United States	Nhava Sheva Sea	KGS	18510	2057959	111	1.776
2016	29051690	2-OCTANOL (CAPRYL ALCOHOL) (PACKED 1 INLIQUID BULK TANK CONTAINER)	United States	Nhava Sheva Sea	KGS	18540	2055768	111	1.776
								Avg	1.5456
								Min	1.28
								Max	1.792
